# Supplementary material for: An experimental study of deformation and fracture characteristics of shale with pore-water pressure and under triaxial cyclic loading
Source: R Soc Open Sci. 2018 Aug 22;5(8):180670. doi: 10.1098/rsos.180670 (PMC6124076; doi:10.1098/rsos.180670)
Supplement: The original data of the experiments under pore-water pressure of 2MPa [file rsos180670supp1.csv]

C:\Documents and Settings\Administrator\����\zhou17.csv
2017/8/17	14:32:39
���.10
diameter:50mm	Standard distance :100mm
���.	time	fload	displacement	deformation1	deformation2	stress	strain1	strain2	confining pressure	displacement2	water-pressure	discharge	temperature
	h	kN	mm	mm	mm	MPa
1	0.0371	0.11	0.832	1.7158	-0.4012	1.461538462	0.034315549	-0.040123402	0.7	0	0.0183	-84.6263	0
2	0.0378	0.21	1.305	1.716	-0.4014	2.743589744	0.034320549	-0.040141402	0.71	0	0.0187	-89.1737	0
3	0.0597	0.33	14.415	1.7299	-0.408	4.205128205	0.034597199	-0.040804802	1	0	0.0195	-145.477	0
4	0.061	0.44	15.199	1.7342	-0.4081	5.692307692	0.034683299	-0.040812602	1	0	0.0187	-145.477	0
5	0.0617	0.56	15.622	1.7369	-0.4081	7.153846154	0.034738649	-0.040808602	1	0	0.0187	-145.477	0
6	0.0625	0.67	16.085	1.7399	-0.4081	8.641025641	0.034798349	-0.040811802	1	0	0.0195	-145.477	0
7	0.0632	0.8	16.532	1.7428	-0.4081	10.30769231	0.034855599	-0.040809402	1	0	0.0191	-145.477	0
8	0.0641	0.92	17.025	1.7456	-0.4081	11.79487179	0.034911549	-0.040806402	1	0	0.0195	-145.477	0
9	0.0647	1.03	17.425	1.7478	-0.4081	13.25641026	0.034956799	-0.040809402	1	0	0.0195	-145.477	0
10	0.0653	1.13	17.805	1.7499	-0.4081	14.53846154	0.034997049	-0.040810202	1	0	0.0187	-145.477	0
11	0.066	1.25	18.192	1.7519	-0.4081	16	0.035037249	-0.040811002	1	0	0.0203	-145.477	0
12	0.0666	1.36	18.578	1.7539	-0.4081	17.48717949	0.035077499	-0.040811802	1	0	0.0191	-145.477	0
13	0.0672	1.48	18.925	1.7556	-0.4081	18.94871795	0.035112099	-0.040810202	1	0	0.0191	-145.477	0
14	0.0678	1.59	19.275	1.7573	-0.4081	20.41025641	0.035146649	-0.040807202	1	0	0.0191	-145.477	0
15	0.0683	1.69	19.571	1.7588	-0.4081	21.69230769	0.035175599	-0.040805602	1	0	0.0187	-145.477	0
16	0.0689	1.81	19.885	1.7605	-0.408	23.15384615	0.035210799	-0.040802402	1	0	0.0191	-145.477	0
17	0.0697	1.91	20.112	1.7622	-0.408	24.43589744	0.035243499	-0.040803202	1	0	0.0183	-145.477	0
18	0.0709	2.02	20.501	1.7642	-0.4082	25.8974359	0.035283099	-0.040816602	1.02	0	0.0195	-145.477	0
19	0.0715	2.14	20.877	1.7656	-0.4082	27.38461538	0.035311399	-0.040824402	1.04	0	0.0187	-145.477	0
20	0.0722	2.25	21.281	1.7674	-0.4083	28.84615385	0.035347199	-0.040830802	1.05	0	0.0191	-145.477	0
21	0.0728	2.36	21.617	1.7687	-0.4083	30.30769231	0.035374249	-0.040833802	1.07	0	0.0187	-145.477	0
22	0.0732	2.46	21.901	1.7701	-0.4084	31.58974359	0.035401299	-0.040841802	1.08	0	0.0183	-145.477	0
23	0.0737	2.59	22.181	1.7713	-0.4085	33.25641026	0.035426449	-0.040845002	1.09	0	0.0187	-145.477	0
24	0.0743	2.71	22.534	1.773	-0.4085	34.74358974	0.035459099	-0.040854402	1.11	0	0.0191	-145.477	0
25	0.0748	2.82	22.824	1.7742	-0.4086	36.20512821	0.035484899	-0.040859202	1.12	0	0.0183	-145.477	0
26	0.0751	2.94	23.047	1.7753	-0.4086	37.69230769	0.035506249	-0.040863002	1.13	0	0.0183	-145.477	0
27	0.0757	3.05	23.41	1.777	-0.4087	39.15384615	0.035539599	-0.040871002	1.14	0	0.0183	-145.477	0
28	0.0762	3.17	23.671	1.7782	-0.4087	40.64102564	0.035563499	-0.040873202	1.16	0	0.0183	-145.477	0
29	0.0766	3.28	23.93	1.7794	-0.4088	42.1025641	0.035587349	-0.040879602	1.17	0	0.0187	-145.477	0
30	0.0771	3.4	24.197	1.7806	-0.4088	43.58974359	0.035611249	-0.040882802	1.18	0	0.0183	-145.477	0
31	0.0775	3.51	24.457	1.7819	-0.4089	45.05128205	0.035637049	-0.040886602	1.19	0	0.0179	-145.477	0
32	0.0779	3.61	24.707	1.783	-0.4093	46.33333333	0.035659049	-0.040933202	1.21	0	0.0183	-145.477	0
33	0.0783	3.73	24.952	1.7842	-0.409	47.79487179	0.035683549	-0.040898402	1.22	0	0.0187	-145.477	0
34	0.0788	3.84	25.145	1.7854	-0.409	49.28205128	0.035708099	-0.040903202	1.23	0	0.0191	-145.477	0
35	0.0798	3.96	25.324	1.787	-0.4092	50.74358974	0.035740749	-0.040917402	1.26	0	0.0179	-145.477	0
36	1.1514	4.07	26.793	1.8	-0.4159	52.23076923	0.035999149	-0.041593202	2.09	0	0.0183	-145.477	0
37	1.1519	4.22	27.305	1.8015	-0.4161	54.12820513	0.036030599	-0.041607402	2.16	0	0.0175	-145.477	0
38	1.1521	4.35	27.654	1.8028	-0.4162	55.79487179	0.036055749	-0.041623202	2.22	0	0.0179	-145.477	0
39	1.1523	4.47	27.909	1.8038	-0.4163	57.28205128	0.036076499	-0.041627202	2.25	0	0.0187	-145.477	0
40	1.1525	4.63	28.295	1.8055	-0.4164	59.38461538	0.036109199	-0.041643002	2.32	0	0.0175	-145.477	0
41	1.1527	4.75	28.553	1.8066	-0.4165	60.84615385	0.036131799	-0.041650002	2.36	0	0.0179	-145.477	0
42	1.1529	4.88	28.81	1.8079	-0.4166	62.53846154	0.036157599	-0.041661002	2.41	0	0.0179	-145.477	0
43	1.1531	5.03	29.066	1.809	-0.4167	64.43589744	0.036180849	-0.041668802	2.46	0	0.0179	-145.477	0
44	1.1532	5.14	29.329	1.8104	-0.4168	65.8974359	0.036207899	-0.041682202	2.52	0	0.0183	-145.477	0
45	1.1534	5.27	29.581	1.8117	-0.4169	67.58974359	0.036233049	-0.041685402	2.57	0	0.0179	-145.477	0
46	1.1536	5.4	29.829	1.8131	-0.4169	69.28205128	0.036262599	-0.041694202	2.63	0	0.0187	-145.477	0
47	1.1538	5.54	30.074	1.8145	-0.417	70.97435897	0.036290249	-0.041704402	2.69	0	0.0183	-145.477	0
48	1.1539	5.67	30.323	1.8161	-0.4172	72.64102564	0.036321699	-0.041723202	2.75	0	0.0179	-145.477	0
49	1.1541	5.81	30.56	1.8175	-0.4174	74.53846154	0.036349349	-0.041736602	2.81	0	0.0183	-145.477	0
50	1.1543	5.98	30.794	1.819	-0.4175	76.64102564	0.036379499	-0.041747602	2.88	0	0.0187	-145.477	0
51	1.1545	6.16	31.14	1.8213	-0.4177	78.97435897	0.036425399	-0.041771402	2.98	0	0.0179	-145.477	0
52	1.1547	6.27	31.366	1.8228	-0.4179	80.43589744	0.036455599	-0.041788602	3.05	0	0.0183	-145.477	0
53	1.1549	6.44	31.594	1.8242	-0.418	82.53846154	0.036483249	-0.041803602	3.12	0	0.0183	-145.477	0
54	1.1551	6.57	31.812	1.8256	-0.4182	84.23076923	0.036512799	-0.041815402	3.19	0	0.0187	-145.477	0
55	1.1552	6.72	32.028	1.8271	-0.4183	86.12820513	0.036542349	-0.041834402	3.26	0	0.0179	-145.477	0
56	1.1554	6.83	32.24	1.8285	-0.4185	87.58974359	0.036569399	-0.041851602	3.33	0	0.0179	-145.477	0
57	1.1556	6.98	32.456	1.83	-0.4187	89.48717949	0.036599549	-0.041873002	3.4	0	0.0187	-145.477	0
58	1.1558	7.11	32.664	1.8313	-0.4189	91.17948718	0.036625349	-0.041891002	3.48	0	0.0175	-145.477	0
59	1.1559	7.24	32.869	1.8326	-0.4191	92.87179487	0.036652999	-0.041910002	3.55	0	0.0175	-145.477	0
60	1.1561	7.37	33.071	1.8339	-0.4193	94.53846154	0.036678749	-0.041927202	3.62	0	0.0179	-145.477	0
61	1.1563	7.52	33.279	1.8354	-0.4195	96.43589744	0.036708299	-0.041947002	3.69	0	0.0179	-145.477	0
62	1.1565	7.64	33.477	1.8368	-0.4196	97.92307692	0.036735349	-0.041962002	3.76	0	0.0175	-145.477	0
63	1.1566	7.77	33.672	1.8381	-0.4198	99.61538462	0.036762999	-0.041978402	3.84	0	0.0175	-145.477	0
64	1.1568	7.88	33.864	1.8395	-0.4199	101.0769231	0.036790699	-0.041992602	3.91	0	0.0179	-145.477	0
65	1.157	8.05	34.059	1.8409	-0.4201	103.1794872	0.036817699	-0.042014002	3.98	0	0.0179	-145.477	0
66	1.1571	8.18	34.247	1.8421	-0.4203	104.8717949	0.036842849	-0.042031202	4.05	0	0.0183	-145.477	0
67	1.1573	8.29	34.433	1.8434	-0.4205	106.3333333	0.036867999	-0.042047802	4.13	0	0.0179	-145.477	0
68	1.1575	8.43	34.618	1.8448	-0.4207	108.025641	0.036896899	-0.042066002	4.2	0	0.0183	-145.477	0
69	1.1578	8.62	34.894	1.8467	-0.4209	110.5641026	0.036933399	-0.042092802	4.3	0	0.0179	-145.477	0
70	1.1579	8.75	35.073	1.848	-0.4211	112.2307692	0.036959799	-0.042108402	4.37	0	0.0179	-145.477	0
71	1.1581	8.89	35.258	1.8493	-0.4212	113.9230769	0.036986199	-0.042123402	4.44	0	0.0179	-145.477	0
72	1.1583	9.03	35.435	1.8506	-0.4214	115.8205128	0.037011349	-0.042140002	4.51	0	0.0179	-145.477	0
73	1.1585	9.21	35.701	1.8525	-0.4216	118.1282051	0.037050299	-0.042164402	4.61	0	0.0183	-145.477	0
74	1.1587	9.33	35.876	1.8538	-0.4218	119.6153846	0.037075449	-0.042182602	4.68	0	0.0175	-145.477	0
75	1.1589	9.48	36.049	1.855	-0.4219	121.5128205	0.037099999	-0.042193602	4.74	0	0.0187	-145.477	0
76	1.1591	9.59	36.198	1.8561	-0.422	122.974359	0.037122599	-0.042203002	4.78	0	0.0183	-145.477	0
77	1.1592	9.72	36.304	1.8573	-0.4221	124.6666667	0.037145249	-0.042210002	4.82	0	0.0183	-145.477	0
78	1.1596	9.87	36.431	1.8589	-0.4223	126.5641026	0.037177949	-0.042225002	4.87	0	0.0187	-145.477	0
79	1.1601	9.99	36.501	1.8603	-0.4224	128.025641	0.037206249	-0.042237602	4.92	0	0.0179	-145.477	0
80	1.1619	10.1	36.824	1.8628	-0.4232	129.5128205	0.037256549	-0.042323602	5.12	0	0.0187	-145.477	0
81	1.1623	10.27	37.117	1.8643	-0.4235	131.6153846	0.037285449	-0.042348802	5.21	0	0.0187	-145.477	0
82	1.1625	10.41	37.354	1.8656	-0.4236	133.5128205	0.037311249	-0.042364402	5.29	0	0.0179	-145.477	0
83	1.1627	10.53	37.523	1.8664	-0.4237	134.974359	0.037328849	-0.042374802	5.35	0	0.0179	-145.477	0
84	1.1629	10.68	37.688	1.8674	-0.4239	136.8717949	0.037348299	-0.042392802	5.4	0	0.0179	-145.477	0
85	1.1631	10.79	37.852	1.8684	-0.424	138.3589744	0.037368449	-0.042404602	5.47	0	0.0179	-145.477	0
86	1.1632	10.92	38.022	1.8695	-0.4242	140.025641	0.037389199	-0.042417202	5.53	0	0.0179	-145.477	0
87	1.1634	11.05	38.184	1.8705	-0.4243	141.7179487	0.037410549	-0.042430602	5.58	0	0.0175	-145.477	0
88	1.1636	11.19	38.343	1.8715	-0.4244	143.4102564	0.037430699	-0.042440002	5.64	0	0.0183	-145.477	0
89	1.1637	11.35	38.506	1.8726	-0.4245	145.5128205	0.037451449	-0.042454202	5.71	0	0.0179	-145.477	0
90	1.164	11.53	38.734	1.8741	-0.4247	147.8205128	0.037482849	-0.042466802	5.8	0	0.0179	-145.477	0
91	1.1642	11.65	38.886	1.8753	-0.4249	149.3076923	0.037505499	-0.042487402	5.86	0	0.0179	-145.477	0
92	1.1644	11.78	39.041	1.8762	-0.4249	150.974359	0.037523099	-0.042492002	5.93	0	0.0187	-145.477	0
93	1.1645	11.89	39.19	1.8773	-0.4251	152.4615385	0.037545099	-0.042513402	5.99	0	0.0179	-145.477	0
94	1.1647	12.06	39.338	1.8783	-0.4252	154.5641026	0.037565849	-0.042521202	6.06	0	0.0179	-145.477	0
95	1.165	12.22	39.562	1.8798	-0.4254	156.6666667	0.037596649	-0.042541802	6.15	0	0.0175	-145.477	0
96	1.1651	12.34	39.709	1.8808	-0.4255	158.1538462	0.037616149	-0.042553602	6.21	0	0.0175	-145.477	0
97	1.1653	12.48	39.86	1.8817	-0.4257	160.0512821	0.037634999	-0.042573202	6.28	0	0.0183	-145.477	0
98	1.1655	12.63	40.006	1.8827	-0.4259	161.9230769	0.037654499	-0.042585002	6.34	0	0.0183	-145.477	0
99	1.1657	12.73	40.15	1.8837	-0.426	163.2051282	0.037673999	-0.042596802	6.41	0	0.0179	-145.477	0
100	1.1658	12.84	40.293	1.8847	-0.4261	164.6666667	0.037694749	-0.042610202	6.47	0	0.0179	-145.477	0
101	1.166	13.01	40.439	1.8856	-0.4263	166.7692308	0.037712949	-0.042626802	6.53	0	0.0179	-145.477	0
102	1.1662	13.14	40.579	1.8867	-0.4264	168.4615385	0.037733099	-0.042637802	6.6	0	0.0183	-145.477	0
103	1.1663	13.26	40.718	1.8876	-0.4265	169.9487179	0.037752549	-0.042651202	6.66	0	0.0179	-145.477	0
104	1.1665	13.39	40.86	1.8886	-0.4266	171.6153846	0.037772699	-0.042664602	6.73	0	0.0183	-145.477	0
105	1.1667	13.49	40.994	1.8895	-0.4268	172.8974359	0.037790899	-0.042677202	6.79	0	0.0187	-145.477	0
106	1.1669	13.62	41.135	1.8906	-0.4269	174.5641026	0.037812299	-0.042690602	6.85	0	0.0183	-145.477	0
107	1.167	13.78	41.272	1.8914	-0.427	176.6666667	0.037827999	-0.042704802	6.92	0	0.0179	-145.477	0
108	1.1672	13.9	41.407	1.8924	-0.4272	178.1538462	0.037848149	-0.042717402	6.98	0	0.0175	-145.477	0
109	1.1674	14.01	41.541	1.8934	-0.4273	179.6153846	0.037868849	-0.042730002	7.04	0	0.0179	-145.477	0
110	1.1676	14.16	41.681	1.8943	-0.4275	181.5128205	0.037886499	-0.042746602	7.11	0	0.0183	-145.477	0
111	1.1677	14.27	41.816	1.8953	-0.4276	183	0.037905349	-0.042756802	7.17	0	0.0183	-145.477	0
112	1.1679	14.39	41.949	1.8961	-0.4277	184.4615385	0.037921699	-0.042771802	7.24	0	0.0179	-145.477	0
113	1.1681	14.52	42.081	1.8971	-0.4279	186.1538462	0.037942449	-0.042785202	7.3	0	0.0179	-145.477	0
114	1.1683	14.65	42.216	1.898	-0.428	187.8461538	0.037960649	-0.042797802	7.36	0	0.0187	-145.477	0
115	1.1684	14.78	42.346	1.899	-0.4281	189.5128205	0.037979499	-0.042811202	7.43	0	0.0175	-145.477	0
116	1.1686	14.91	42.475	1.8998	-0.4282	191.2051282	0.037996499	-0.042824602	7.49	0	0.0183	-145.477	0
117	1.1688	15.03	42.604	1.9007	-0.4284	192.6923077	0.038014749	-0.042838002	7.55	0	0.0183	-145.477	0
118	1.169	15.16	42.737	1.9016	-0.4285	194.3589744	0.038031699	-0.042852002	7.62	0	0.0171	-145.477	0
119	1.1691	15.29	42.864	1.9025	-0.4286	196.0512821	0.038050549	-0.042863202	7.68	0	0.0175	-145.477	0
120	1.1693	15.41	42.991	1.9034	-0.4288	197.5128205	0.038068799	-0.042876602	7.74	0	0.0179	-145.477	0
121	1.1695	15.54	43.117	1.9043	-0.4289	199.2051282	0.038086399	-0.042887602	7.81	0	0.0179	-145.477	0
122	1.1696	15.67	43.248	1.9052	-0.429	200.8974359	0.038103999	-0.042900202	7.87	0	0.0179	-145.477	0
123	1.1698	15.8	43.372	1.9061	-0.4292	202.5897436	0.038121599	-0.042915202	7.94	0	0.0175	-145.477	0
124	1.17	15.92	43.495	1.9068	-0.4293	204.0512821	0.038136699	-0.042930002	8	0	0.0179	-145.477	0
125	1.1702	16.06	43.619	1.9078	-0.4294	205.9487179	0.038156199	-0.042942602	8.06	0	0.0179	-145.477	0
126	1.1704	16.21	43.807	1.9091	-0.4296	207.8461538	0.038181949	-0.042958402	8.16	0	0.0179	-145.477	0
127	1.1706	16.36	43.933	1.91	-0.4298	209.7435897	0.038199549	-0.042975802	8.22	0	0.0175	-145.477	0
128	1.1708	16.51	44.054	1.9109	-0.4299	211.6410256	0.038217799	-0.042989202	8.28	0	0.0171	-145.477	0
129	1.171	16.64	44.174	1.9117	-0.43	213.3076923	0.038233499	-0.043001002	8.34	0	0.0171	-145.477	0
130	1.1711	16.75	44.294	1.9126	-0.4302	214.7948718	0.038251099	-0.043016802	8.41	0	0.0179	-145.477	0
131	1.1713	16.89	44.417	1.9134	-0.4303	216.4871795	0.038267449	-0.043027002	8.47	0	0.0179	-145.477	0
132	1.1715	17.02	44.535	1.9143	-0.4304	218.1538462	0.038285699	-0.043042802	8.53	0	0.0179	-145.477	0
133	1.1716	17.12	44.654	1.9151	-0.4305	219.4358974	0.038302649	-0.043053802	8.6	0	0.0175	-145.477	0
134	1.1718	17.25	44.773	1.916	-0.4306	221.1025641	0.038319649	-0.043064802	8.66	0	0.0171	-145.477	0
135	1.172	17.39	44.894	1.9168	-0.4308	223	0.038335999	-0.043077402	8.72	0	0.0179	-145.477	0
136	1.1722	17.51	45.012	1.9176	-0.4309	224.4871795	0.038351099	-0.043094802	8.79	0	0.0171	-145.477	0
137	1.1723	17.64	45.128	1.9184	-0.4311	226.1538462	0.038367399	-0.043106602	8.85	0	0.0171	-145.477	0
138	1.1725	17.77	45.245	1.9192	-0.4311	227.8461538	0.038384399	-0.043114402	8.91	0	0.0179	-145.477	0
139	1.1727	17.9	45.364	1.92	-0.4313	229.5384615	0.038400749	-0.043131002	8.98	0	0.0179	-145.477	0
140	1.1729	18.04	45.479	1.9209	-0.4314	231.2307692	0.038418949	-0.043143602	9.04	0	0.0183	-145.477	0
141	1.1731	18.22	45.653	1.9221	-0.4316	233.5384615	0.038442849	-0.043162402	9.13	0	0.0175	-145.477	0
142	1.1733	18.33	45.767	1.923	-0.4318	235	0.038460449	-0.043177402	9.2	0	0.0175	-145.477	0
143	1.1735	18.46	45.879	1.9238	-0.4319	236.6923077	0.038476799	-0.043190002	9.26	0	0.0183	-145.477	0
144	1.1736	18.59	45.991	1.9247	-0.432	238.3846154	0.038493149	-0.043197802	9.32	0	0.0171	-145.477	0
145	1.1738	18.71	46.105	1.9255	-0.4322	239.8461538	0.038509499	-0.043215202	9.39	0	0.0175	-145.477	0
146	1.174	18.84	46.216	1.9262	-0.4323	241.5384615	0.038523349	-0.043227002	9.45	0	0.0171	-145.477	0
147	1.1742	18.95	46.325	1.9271	-0.4324	243	0.038542199	-0.043239602	9.51	0	0.0175	-145.477	0
148	1.1743	19.09	46.436	1.9279	-0.4325	244.6923077	0.038557899	-0.043249802	9.58	0	0.0183	-145.477	0
149	1.1745	19.22	46.549	1.9286	-0.4326	246.3846154	0.038572349	-0.043260202	9.64	0	0.0175	-145.477	0
150	1.1747	19.35	46.659	1.9296	-0.4328	248.0769231	0.038591249	-0.043276602	9.7	0	0.0179	-145.477	0
151	1.1749	19.48	46.77	1.9303	-0.4329	249.7435897	0.038605699	-0.043286202	9.77	0	0.0171	-145.477	0
152	1.175	19.6	46.88	1.9311	-0.433	251.2307692	0.038621399	-0.043299602	9.83	0	0.0183	-145.477	0
153	1.1752	19.73	46.992	1.9319	-0.4331	252.8974359	0.038638399	-0.043314402	9.89	0	0.0175	-145.477	0
154	1.1754	19.83	47.101	1.9327	-0.4333	254.1794872	0.038654099	-0.043329402	9.96	0	0.0179	-145.477	0
155	1.1756	19.97	47.212	1.9336	-0.4334	256.0769231	0.038671099	-0.043341202	10.02	0	0.0191	-145.477	0
156	1.1757	20.1	47.326	1.9343	-0.4336	257.7435897	0.038686799	-0.043357802	10.08	0	0.0216	-145.477	0
157	1.1759	20.22	47.439	1.9352	-0.4337	259.2307692	0.038703149	-0.043372802	10.14	0	0.022	-145.477	0
158	1.1761	20.35	47.551	1.936	-0.4339	260.9230769	0.038719499	-0.043387002	10.21	0	0.0224	-145.477	0
159	1.1762	20.47	47.658	1.9367	-0.4339	262.3846154	0.038733299	-0.043393202	10.27	0	0.0216	-145.477	0
160	1.1764	20.6	47.765	1.9374	-0.434	264.0769231	0.038747799	-0.043403402	10.34	0	0.0216	-145.477	0
161	1.1766	20.73	47.877	1.9383	-0.4342	265.7435897	0.038765999	-0.043415402	10.4	0	0.0212	-145.477	0
162	1.1768	20.86	47.984	1.9391	-0.4343	267.4358974	0.038781749	-0.043429402	10.46	0	0.0212	-145.477	0
163	1.1769	20.98	48.09	1.9398	-0.4344	268.9230769	0.038795549	-0.043442002	10.52	0	0.0216	-145.477	0
164	1.1771	21.11	48.2	1.9406	-0.4345	270.5897436	0.038811899	-0.043450002	10.59	0	0.022	-145.477	0
165	1.1774	21.3	48.358	1.9418	-0.4348	273.1282051	0.038835149	-0.043480602	10.68	0	0.0224	-145.477	0
166	1.1775	21.42	48.467	1.9425	-0.4349	274.5897436	0.038850899	-0.043491002	10.74	0	0.022	-145.477	0
167	1.1777	21.53	48.572	1.9432	-0.4351	276.0769231	0.038864699	-0.043506602	10.8	0	0.022	-145.477	0
168	1.1779	21.67	48.676	1.9441	-0.4351	277.7692308	0.038881699	-0.043512202	10.87	0	0.0224	-145.477	0
169	1.1781	21.81	48.779	1.9448	-0.4353	279.6410256	0.038896749	-0.043527202	10.93	0	0.022	-145.477	0
170	1.1782	21.93	48.884	1.9456	-0.4353	281.1282051	0.038912499	-0.043534202	10.99	0	0.0216	-145.477	0
171	1.1784	22.04	48.986	1.9464	-0.4355	282.5897436	0.038928199	-0.043553202	11.06	0	0.022	-145.477	0
172	1.1786	22.17	49.089	1.9473	-0.4357	284.2820513	0.038945799	-0.043565002	11.12	0	0.022	-145.477	0
173	1.1788	22.29	49.192	1.948	-0.4357	285.7692308	0.038959649	-0.043573602	11.18	0	0.0224	-145.477	0
174	1.1789	22.4	49.298	1.9487	-0.4359	287.2307692	0.038973449	-0.043586202	11.25	0	0.022	-145.477	0
175	1.1791	22.55	49.402	1.9494	-0.436	289.1282051	0.038987949	-0.043598002	11.31	0	0.0216	-145.477	0
176	1.1793	22.68	49.505	1.9502	-0.4361	290.8205128	0.039004899	-0.043606002	11.37	0	0.022	-145.477	0
177	1.1795	22.8	49.609	1.9509	-0.4362	292.2820513	0.039018749	-0.043624802	11.43	0	0.0216	-145.477	0
178	1.1796	22.93	49.715	1.9516	-0.4363	293.974359	0.039032549	-0.043633602	11.5	0	0.0216	-145.477	0
179	1.1798	23.06	49.818	1.9524	-0.4364	295.6666667	0.039047649	-0.043643802	11.56	0	0.022	-145.477	0
180	1.18	23.18	49.918	1.9532	-0.4366	297.1282051	0.039064649	-0.043659602	11.62	0	0.0216	-145.477	0
181	1.1802	23.32	50.018	1.954	-0.4368	299.025641	0.039079699	-0.043675202	11.69	0	0.0212	-145.477	0
182	1.1803	23.46	50.121	1.9548	-0.4369	300.7179487	0.039095449	-0.043690202	11.75	0	0.0216	-145.477	0
183	1.1806	23.64	50.272	1.9558	-0.4371	303.025641	0.039116199	-0.043705202	11.84	0	0.0216	-145.477	0
184	1.1808	23.75	50.373	1.9566	-0.4371	304.5128205	0.039131899	-0.043710802	11.9	0	0.0224	-145.477	0
185	1.1809	23.88	50.473	1.9574	-0.4373	306.1794872	0.039147599	-0.043731202	11.97	0	0.0224	-145.477	0
186	1.1811	24	50.572	1.9581	-0.4374	307.6666667	0.039161449	-0.043743802	12.03	0	0.0216	-145.477	0
187	1.1813	24.15	50.671	1.9588	-0.4376	309.5641026	0.039175899	-0.043755602	12.09	0	0.0216	-145.477	0
188	1.1815	24.26	50.772	1.9596	-0.4377	311.025641	0.039192249	-0.043769002	12.15	0	0.0216	-145.477	0
189	1.1816	24.38	50.869	1.9603	-0.4377	312.5128205	0.039205449	-0.043773002	12.22	0	0.022	-145.477	0
190	1.1818	24.52	50.968	1.9611	-0.438	314.4102564	0.039221199	-0.043797402	12.28	0	0.0212	-145.477	0
191	1.182	24.64	51.066	1.9617	-0.438	315.8717949	0.039233749	-0.043803602	12.35	0	0.0212	-145.477	0
192	1.1821	24.75	51.166	1.9626	-0.4382	317.3589744	0.039251349	-0.043817802	12.4	0	0.0216	-145.477	0
193	1.1823	24.88	51.263	1.9632	-0.4383	319.025641	0.039264549	-0.043827402	12.47	0	0.022	-145.477	0
194	1.1825	25	51.361	1.9639	-0.4385	320.5128205	0.039278999	-0.043845402	12.53	0	0.0216	-145.477	0
195	1.1827	25.13	51.459	1.9646	-0.4386	322.1794872	0.039292849	-0.043858002	12.59	0	0.0212	-145.477	0
196	1.1828	25.25	51.56	1.9655	-0.4387	323.6666667	0.039309799	-0.043868202	12.66	0	0.0212	-145.477	0
197	1.183	25.39	51.655	1.9661	-0.4388	325.5641026	0.039322399	-0.043881602	12.72	0	0.0207	-145.477	0
198	1.1832	25.51	51.75	1.9668	-0.4389	327.025641	0.039336849	-0.043892602	12.78	0	0.0216	-145.477	0
199	1.1834	25.64	51.845	1.9677	-0.4391	328.7179487	0.039353849	-0.043908402	12.85	0	0.0216	-145.477	0
200	1.1835	25.77	51.944	1.9683	-0.4392	330.4102564	0.039365749	-0.043917802	12.91	0	0.0216	-145.477	0
201	1.1837	25.9	52.039	1.9691	-0.4393	332.0769231	0.039382749	-0.043930402	12.97	0	0.0224	-145.477	0
202	1.1839	26.02	52.133	1.9698	-0.4394	333.5641026	0.039396599	-0.043940802	13.03	0	0.0216	-145.477	0
203	1.1841	26.13	52.226	1.9705	-0.4396	335.025641	0.039409799	-0.043955802	13.1	0	0.0207	-145.477	0
204	1.1842	26.28	52.323	1.9713	-0.4397	336.9230769	0.039425499	-0.043966002	13.16	0	0.022	-145.477	0
205	1.1844	26.41	52.418	1.972	-0.4398	338.6153846	0.039439349	-0.043978602	13.22	0	0.0212	-145.477	0
206	1.1846	26.53	52.511	1.9726	-0.4399	340.1025641	0.039452549	-0.043989602	13.29	0	0.0212	-145.477	0
207	1.1848	26.74	52.651	1.9738	-0.4401	342.8205128	0.039475799	-0.044007602	13.38	0	0.022	-145.477	0
208	1.1851	26.89	52.791	1.9749	-0.4403	344.7179487	0.039497149	-0.044026602	13.47	0	0.0207	-145.477	0
209	1.1853	27.04	52.885	1.9755	-0.4404	346.6153846	0.039510999	-0.044036802	13.54	0	0.022	-145.477	0
210	1.1854	27.15	52.977	1.9763	-0.4405	348.1025641	0.039525449	-0.044050202	13.6	0	0.0216	-145.477	0
211	1.1856	27.27	53.075	1.9769	-0.4406	349.5641026	0.039538649	-0.044062002	13.66	0	0.0216	-145.477	0
212	1.1858	27.38	53.169	1.9777	-0.4408	351.0512821	0.039554999	-0.044075402	13.72	0	0.022	-145.477	0
213	1.186	27.51	53.265	1.9784	-0.4409	352.7179487	0.039567599	-0.044087202	13.79	0	0.0216	-145.477	0
214	1.1861	27.64	53.358	1.9791	-0.441	354.4102564	0.039581399	-0.044099802	13.85	0	0.0216	-145.477	0
215	1.1863	27.79	53.449	1.9798	-0.4411	356.3076923	0.039595249	-0.044111602	13.91	0	0.022	-145.477	0
216	1.1865	27.91	53.539	1.9805	-0.4412	357.7692308	0.039609699	-0.044123402	13.98	0	0.0224	-145.477	0
217	1.1867	28.02	53.63	1.9811	-0.4414	359.2564103	0.039622299	-0.044144802	14.04	0	0.0216	-145.477	0
218	1.1868	28.17	53.723	1.9819	-0.4416	361.1538462	0.039637349	-0.044156602	14.1	0	0.022	-145.477	0
219	1.187	28.37	53.799	1.9829	-0.4416	363.6666667	0.039658099	-0.044161402	14.17	0	0.022	-145.477	0
220	1.1873	28.47	53.905	1.984	-0.4418	364.9487179	0.039680749	-0.044180202	14.26	0	0.022	-145.477	0
221	1.1875	28.61	54.059	1.9846	-0.4421	366.8461538	0.039692699	-0.044206202	14.35	0	0.0212	-145.477	0
222	1.1877	28.78	54.161	1.9854	-0.4422	368.9487179	0.039707149	-0.044217202	14.41	0	0.0212	-145.477	0
223	1.1879	28.93	54.255	1.986	-0.4423	370.8461538	0.039720999	-0.044230602	14.48	0	0.0216	-145.477	0
224	1.1881	29.11	54.394	1.9871	-0.4425	373.1538462	0.039741749	-0.044248802	14.57	0	0.0212	-145.477	0
225	1.1883	29.22	54.485	1.9879	-0.4426	374.6153846	0.039757449	-0.044262202	14.64	0	0.022	-145.477	0
226	1.1885	29.35	54.573	1.9886	-0.4427	376.3076923	0.039771299	-0.044273202	14.7	0	0.0216	-145.477	0
227	1.1887	29.48	54.664	1.9893	-0.4429	378	0.039785099	-0.044287402	14.76	0	0.0216	-145.477	0
228	1.1888	29.62	54.751	1.9899	-0.443	379.6923077	0.039798949	-0.044299202	14.82	0	0.022	-145.477	0
229	1.1891	29.78	54.883	1.991	-0.4432	381.7948718	0.039820949	-0.044316402	14.92	0	0.0216	-145.477	0
230	1.1893	29.91	54.97	1.9917	-0.4433	383.4615385	0.039833499	-0.044328402	14.98	0	0.022	-145.477	0
231	1.1894	30.04	55.057	1.9924	-0.4434	385.1538462	0.039848599	-0.044342402	15.04	0	0.0212	-145.477	0
232	1.1897	30.24	55.187	1.9936	-0.4436	387.6923077	0.039871249	-0.044360602	15.14	0	0.0207	-145.477	0
233	1.1899	30.37	55.274	1.9941	-0.4437	389.3589744	0.039882549	-0.044370802	15.2	0	0.0212	-145.477	0
234	1.19	30.49	55.363	1.9948	-0.4439	390.8461538	0.039895149	-0.044385002	15.26	0	0.0212	-145.477	0
235	1.1902	30.6	55.449	1.9956	-0.444	392.3076923	0.039912749	-0.044396802	15.32	0	0.0216	-145.477	0
236	1.1904	30.73	55.536	1.9962	-0.4441	394	0.039924699	-0.044409402	15.39	0	0.0216	-145.477	0
237	1.1906	30.88	55.621	1.9969	-0.4442	395.8974359	0.039938499	-0.044419602	15.45	0	0.0216	-145.477	0
238	1.1907	30.99	55.709	1.9976	-0.4443	397.3589744	0.039951099	-0.044433802	15.51	0	0.0212	-145.477	0
239	1.1909	31.13	55.794	1.9983	-0.4444	399.0512821	0.039966149	-0.044444202	15.57	0	0.0212	-145.477	0
240	1.1911	31.24	55.878	1.999	-0.4446	400.5384615	0.039979999	-0.044456002	15.64	0	0.0216	-145.477	0
241	1.1913	31.36	55.963	1.9997	-0.4447	402	0.039994449	-0.044466202	15.7	0	0.0216	-145.477	0
242	1.1914	31.47	56.049	2.0004	-0.4448	403.4871795	0.040008299	-0.044481202	15.76	0	0.0216	-145.477	0
243	1.1916	31.64	56.133	2.0011	-0.4449	405.5897436	0.040022749	-0.044492202	15.82	0	0.0216	-145.477	0
244	1.1918	31.75	56.216	2.0018	-0.445	407.0512821	0.040035349	-0.044501602	15.89	0	0.022	-145.477	0
245	1.192	31.87	56.299	2.0024	-0.4452	408.5384615	0.040047249	-0.044515802	15.95	0	0.0216	-145.477	0
246	1.1921	32.01	56.385	2.0032	-0.4453	410.4358974	0.040063599	-0.044528402	16.01	0	0.022	-145.477	0
247	1.1924	32.19	56.51	2.0042	-0.4455	412.7435897	0.040083099	-0.044547202	16.1	0	0.022	-145.477	0
248	1.1927	32.37	56.633	2.0051	-0.4456	415.0512821	0.040101949	-0.044561402	16.2	0	0.0212	-145.477	0
249	1.1928	32.49	56.717	2.0058	-0.4458	416.5384615	0.040116449	-0.044575602	16.26	0	0.0212	-145.477	0
250	1.193	32.62	56.799	2.0065	-0.4459	418.2051282	0.040129649	-0.044588202	16.33	0	0.022	-145.477	0
251	1.1932	32.75	56.88	2.007	-0.446	419.8974359	0.040140949	-0.044599202	16.39	0	0.0216	-145.477	0
252	1.1933	32.87	56.961	2.0078	-0.4461	421.3846154	0.040156649	-0.044614202	16.45	0	0.0212	-145.477	0
253	1.1935	33.02	57.045	2.0086	-0.4462	423.2820513	0.040171749	-0.044623002	16.51	0	0.0216	-145.477	0
254	1.1938	33.2	57.166	2.0096	-0.4464	425.5897436	0.040191249	-0.044641002	16.61	0	0.0212	-145.477	0
255	1.194	33.34	57.248	2.0102	-0.4465	427.4871795	0.040204449	-0.044654402	16.67	0	0.0212	-145.477	0
256	1.1942	33.52	57.368	2.0112	-0.4467	429.7948718	0.040223949	-0.044672602	16.76	0	0.0216	-145.477	0
257	1.1945	33.71	57.485	2.0123	-0.4469	432.1282051	0.040245299	-0.044689802	16.86	0	0.0207	-145.477	0
258	1.1946	33.82	57.567	2.0129	-0.447	433.5897436	0.040257249	-0.044702402	16.92	0	0.0216	-145.477	0
259	1.1948	33.93	57.645	2.0136	-0.4472	435.0512821	0.040271099	-0.044717402	16.98	0	0.0212	-145.477	0
260	1.195	34.07	57.724	2.0143	-0.4473	436.7435897	0.040285549	-0.044726202	17.05	0	0.0207	-145.477	0
261	1.1952	34.2	57.805	2.0149	-0.4474	438.4358974	0.040298749	-0.044739602	17.11	0	0.0212	-145.477	0
262	1.1954	34.39	57.92	2.0159	-0.4475	440.9487179	0.040317599	-0.044753602	17.2	0	0.0212	-145.477	0
263	1.1956	34.53	58	2.0166	-0.4477	442.6410256	0.040332699	-0.044768602	17.27	0	0.0212	-145.477	0
264	1.1958	34.64	58.078	2.0173	-0.4478	444.1282051	0.040345249	-0.044781202	17.33	0	0.0216	-145.477	0
265	1.196	34.76	58.155	2.018	-0.4479	445.5897436	0.040359099	-0.044791402	17.39	0	0.0199	-145.477	0
266	1.1961	34.87	58.232	2.0186	-0.448	447.0769231	0.040371049	-0.044804002	17.45	0	0.0207	-145.477	0
267	1.1963	35.04	58.311	2.0193	-0.4482	449.1794872	0.040386749	-0.044815202	17.51	0	0.0216	-145.477	0
268	1.1966	35.22	58.426	2.0203	-0.4483	451.4871795	0.040406899	-0.044833202	17.61	0	0.0212	-145.477	0
269	1.1967	35.33	58.506	2.021	-0.4484	452.974359	0.040420699	-0.044844202	17.67	0	0.0212	-145.477	0
270	1.1969	35.45	58.581	2.0217	-0.4486	454.4358974	0.040433299	-0.044858402	17.73	0	0.0203	-145.477	0
271	1.1971	35.59	58.656	2.0224	-0.4487	456.3333333	0.040447099	-0.044870202	17.8	0	0.0212	-145.477	0
272	1.1973	35.71	58.731	2.0231	-0.4488	457.7948718	0.040461549	-0.044882002	17.86	0	0.0216	-145.477	0
273	1.1974	35.81	58.809	2.0237	-0.4489	459.0769231	0.040474149	-0.044891602	17.92	0	0.0207	-145.477	0
274	1.1976	35.96	58.885	2.0244	-0.4491	460.974359	0.040487349	-0.044906602	17.99	0	0.0212	-145.477	0
275	1.1978	36.1	58.959	2.0251	-0.4492	462.8717949	0.040501799	-0.044916802	18.05	0	0.0212	-145.477	0
276	1.198	36.28	59.073	2.026	-0.4494	465.1794872	0.040520649	-0.044940402	18.14	0	0.0212	-145.477	0
277	1.1983	36.45	59.185	2.027	-0.4496	467.2820513	0.040540799	-0.044956202	18.23	0	0.0212	-145.477	0
278	1.1985	36.56	59.259	2.0277	-0.4497	468.7692308	0.040553999	-0.044965602	18.3	0	0.0207	-145.477	0
279	1.1986	36.71	59.336	2.0284	-0.4498	470.6410256	0.040567799	-0.044977402	18.36	0	0.0216	-145.477	0
280	1.1988	36.83	59.409	2.029	-0.4499	472.1282051	0.040580999	-0.044992402	18.42	0	0.0216	-145.477	0
281	1.199	36.96	59.483	2.0297	-0.45	473.8205128	0.040594849	-0.045002602	18.49	0	0.0207	-145.477	0
282	1.1992	37.09	59.556	2.0303	-0.4502	475.4871795	0.040606799	-0.045016802	18.55	0	0.0212	-145.477	0
283	1.1993	37.22	59.629	2.0311	-0.4503	477.1794872	0.040622499	-0.045028602	18.61	0	0.0207	-145.477	0
284	1.1995	37.35	59.705	2.0317	-0.4504	478.8717949	0.040633849	-0.045039602	18.67	0	0.0212	-145.477	0
285	1.1997	37.47	59.778	2.0323	-0.4505	480.3333333	0.040646399	-0.045051402	18.73	0	0.0216	-145.477	0
286	1.1999	37.58	59.852	2.033	-0.4506	481.8205128	0.040659599	-0.045062402	18.8	0	0.0212	-145.477	0
287	1.2	37.71	59.928	2.0338	-0.4508	483.4871795	0.040675349	-0.045075002	18.86	0	0.0212	-145.477	0
288	1.2002	37.86	60.001	2.0345	-0.4509	485.3846154	0.040689149	-0.045086202	18.92	0	0.0207	-145.477	0
289	1.2004	37.98	60.073	2.0351	-0.451	486.8717949	0.040701099	-0.045098802	18.99	0	0.0216	-145.477	0
290	1.2006	38.11	60.144	2.0358	-0.4511	488.5641026	0.040715549	-0.045108202	19.05	0	0.0212	-145.477	0
291	1.2008	38.27	60.255	2.0368	-0.4512	490.6666667	0.040736299	-0.045123202	19.14	0	0.022	-145.477	0
292	1.201	38.4	60.327	2.0375	-0.4513	492.3333333	0.040749499	-0.045134202	19.21	0	0.022	-145.477	0
293	1.2012	38.5	60.4	2.0381	-0.4515	493.6153846	0.040762699	-0.045146802	19.27	0	0.022	-145.477	0
294	1.2013	38.67	60.471	2.0388	-0.4516	495.7179487	0.040775899	-0.045161002	19.33	0	0.0212	-145.477	0
295	1.2016	38.85	60.58	2.0398	-0.4517	498.025641	0.040796049	-0.045174402	19.42	0	0.0216	-145.477	0
296	1.2018	38.96	60.651	2.0405	-0.4519	499.5128205	0.040810499	-0.045188602	19.49	0	0.0212	-145.477	0
297	1.2019	39.09	60.722	2.0412	-0.452	501.1794872	0.040824949	-0.045199602	19.55	0	0.0207	-145.477	0
298	1.2021	39.22	60.793	2.0418	-0.4521	502.8717949	0.040835649	-0.045211402	19.61	0	0.0207	-145.477	0
299	1.2023	39.34	60.864	2.0425	-0.4522	504.3333333	0.040850099	-0.045221602	19.67	0	0.0212	-145.477	0
300	1.2025	39.47	60.933	2.0432	-0.4523	506.025641	0.040863299	-0.045231802	19.74	0	0.022	-145.477	0
301	1.2026	39.6	61.003	2.0438	-0.4524	507.7179487	0.040875249	-0.045244402	19.8	0	0.0207	-145.477	0
302	1.2028	39.73	61.073	2.0443	-0.4525	509.4102564	0.040886549	-0.045254602	19.86	0	0.0216	-145.477	0
303	1.203	39.86	61.135	2.0451	-0.4526	511.0769231	0.040902299	-0.045259402	19.9	0	0.0216	-145.477	0
304	1.2038	39.96	61.242	2.0465	-0.4528	512.3589744	0.040930549	-0.045283802	19.97	0	0.0207	-145.477	0
305	3.7041	40.09	70.814	2.082	-0.4834	514.025641	0.041639749	-0.048342602	20	0	14.0005	36.5336	0
306	3.7042	40.19	70.845	2.0821	-0.4833	515.3076923	0.041641599	-0.048333202	20	0	14.0009	36.5331	0
307	3.7043	40.31	70.882	2.0821	-0.4833	516.7692308	0.041642249	-0.048331602	20	0	14.0017	36.5326	0
308	3.7044	40.42	70.916	2.0824	-0.4834	518.2564103	0.041647899	-0.048337802	20	0	14.0009	36.5319	0
309	3.7045	40.55	70.953	2.0824	-0.4836	519.9230769	0.041648549	-0.048355202	20	0	14.0009	36.5311	0
310	3.7045	40.69	70.991	2.0826	-0.4834	521.6153846	0.041652949	-0.048338602	20	0	14.0013	36.5304	0
311	3.7047	40.92	71.07	2.0832	-0.4833	524.5641026	0.041663599	-0.048330002	20	0	14.0009	36.5292	0
312	3.7049	41.15	71.158	2.0838	-0.4832	527.5128205	0.041676199	-0.048315002	20	0	14.0005	36.5283	0
313	3.705	41.26	71.206	2.0843	-0.4831	528.974359	0.041685649	-0.048310402	20	0	13.9997	36.5279	0
314	3.7051	41.38	71.251	2.0847	-0.4832	530.4615385	0.041693149	-0.048320602	20	0	14.0013	36.5276	0
315	3.7052	41.51	71.299	2.085	-0.4832	532.1538462	0.041699449	-0.048315802	20	0	14.0001	36.5273	0
316	3.7052	41.64	71.347	2.0855	-0.483	533.8205128	0.041710149	-0.048297802	20	0	14.0001	36.5272	0
317	3.7053	41.75	71.391	2.0859	-0.483	535.3076923	0.041717699	-0.048295402	20	0	14.0005	36.527	0
318	3.7054	41.88	71.438	2.0862	-0.483	536.974359	0.041724599	-0.048300002	20	0	14.0005	36.5269	0
319	3.7055	42	71.481	2.0867	-0.4829	538.4615385	0.041733399	-0.048288202	20	0	13.9997	36.5265	0
320	3.7056	42.15	71.527	2.0871	-0.4829	540.3589744	0.041741599	-0.048289802	20	0	14.0009	36.5264	0
321	3.7057	42.28	71.572	2.0875	-0.4829	542.0512821	0.041749099	-0.048285202	20	0	14.0001	36.5261	0
322	3.7058	42.39	71.614	2.0878	-0.4828	543.5128205	0.041756649	-0.048282802	20	0	14.0005	36.5257	0
323	3.7058	42.54	71.659	2.0882	-0.4826	545.4102564	0.041764199	-0.048260602	20	0	14.0009	36.5255	0
324	3.7059	42.66	71.703	2.0884	-0.4828	546.8717949	0.041768599	-0.048278802	20	0	14.0001	36.5252	0
325	3.706	42.77	71.745	2.0889	-0.4826	548.3589744	0.041778649	-0.048263802	20	0	14.0005	36.5249	0
326	3.7061	42.9	71.788	2.0893	-0.4825	550.0512821	0.041785599	-0.048254402	20	0	14.0005	36.5248	0
327	3.7062	43.02	71.829	2.0897	-0.4825	551.5128205	0.041794399	-0.048245002	20	0	14.0001	36.5245	0
328	3.7063	43.15	71.874	2.09	-0.4824	553.2051282	0.041800049	-0.048238602	20	0	14.0001	36.5244	0
329	3.7064	43.3	71.918	2.0904	-0.4825	555.1025641	0.041807599	-0.048249602	20	0	14.0005	36.5243	0
330	3.7065	43.51	72.003	2.0911	-0.4824	557.8461538	0.041822049	-0.048242602	20	0	14.0001	36.5243	0
331	3.7066	43.64	72.048	2.0915	-0.4823	559.5128205	0.041829599	-0.048226002	20	0	14.0005	36.5242	0
332	3.7067	43.79	72.089	2.0919	-0.4823	561.4102564	0.041837149	-0.048229202	20	0	14.0005	36.524	0
333	3.7068	43.91	72.132	2.0922	-0.4822	562.8974359	0.041844049	-0.048221402	20	0	14.0005	36.5239	0
334	3.7069	44.02	72.174	2.0926	-0.4821	564.3589744	0.041852249	-0.048209402	20	0	14.0005	36.5237	0
335	3.707	44.14	72.217	2.093	-0.4821	565.8461538	0.041859749	-0.048208002	20	0	14.0001	36.5236	0
336	3.7071	44.28	72.261	2.0932	-0.482	567.7435897	0.041864799	-0.048196002	20	0	14.0001	36.5233	0
337	3.7072	44.53	72.346	2.0941	-0.4819	570.8974359	0.041882399	-0.048192202	20	0	13.9997	36.5231	0
338	3.7073	44.66	72.39	2.0945	-0.4817	572.5641026	0.041889299	-0.048174802	20	0	14.0001	36.523	0
339	3.7074	44.79	72.431	2.0948	-0.4818	574.2564103	0.041896249	-0.048178002	20	0	14.0005	36.5229	0
340	3.7075	44.91	72.476	2.0951	-0.4817	575.7435897	0.041902499	-0.048171602	20	0	13.9997	36.5228	0
341	3.7076	45.02	72.516	2.0955	-0.4817	577.2051282	0.041909449	-0.048170202	20	0	14.0005	36.5227	0
342	3.7077	45.14	72.559	2.0959	-0.4817	578.6923077	0.041918849	-0.048170202	20	0	14.0001	36.5225	0
343	3.7078	45.29	72.603	2.0963	-0.4818	580.5897436	0.041925149	-0.048183402	20	0	13.9997	36.5224	0
344	3.7078	45.4	72.643	2.0967	-0.4818	582.0512821	0.041934599	-0.048175602	20	0	14.0005	36.5223	0
345	3.7079	45.52	72.687	2.0971	-0.4815	583.5384615	0.041942149	-0.048152002	20	0	14.0005	36.5222	0
346	3.708	45.68	72.73	2.0975	-0.4814	585.6410256	0.041950299	-0.048143402	20	0	14.0005	36.5219	0
347	3.7081	45.79	72.77	2.0977	-0.4814	587.1025641	0.041954699	-0.048139402	20	0	13.9997	36.5217	0
348	3.7082	45.91	72.813	2.0982	-0.4815	588.5897436	0.041964749	-0.048145602	20	0	14.0001	36.5218	0
349	3.7083	46.02	72.854	2.0985	-0.4813	590.0512821	0.041970399	-0.048132202	20	0	13.9997	36.5218	0
350	3.7084	46.16	72.897	2.0989	-0.4814	591.7435897	0.041977349	-0.048139402	20	0	13.9997	36.522	0
351	3.7085	46.27	72.941	2.0993	-0.4813	593.2051282	0.041986149	-0.048134602	20	0	14.0005	36.522	0
352	3.7085	46.39	72.981	2.0997	-0.4813	594.6923077	0.041993049	-0.048128402	20	0	14.0005	36.522	0
353	3.7086	46.52	73.025	2.0999	-0.4812	596.3589744	0.041998699	-0.048123602	20	0	14.0005	36.5219	0
354	3.7087	46.65	73.067	2.1004	-0.4811	598.0512821	0.042008149	-0.048108602	20	0	14.0005	36.5218	0
355	3.7088	46.78	73.107	2.1008	-0.4811	599.7435897	0.042015699	-0.048107002	20	0	14.0005	36.5215	0
356	3.7089	46.91	73.151	2.101	-0.481	601.4358974	0.042020699	-0.048100802	20	0	14.0001	36.5212	0
357	3.7091	47.17	73.234	2.1019	-0.4809	604.7948718	0.042037699	-0.048086602	20	0	13.9993	36.5211	0
358	3.7092	47.42	73.316	2.1026	-0.4807	607.9487179	0.042052149	-0.048070802	20	0	14.0001	36.5211	0
359	3.7094	47.65	73.403	2.1034	-0.4807	610.8974359	0.042068499	-0.048065402	20	0	14.0001	36.5211	0
360	3.7095	47.78	73.442	2.1037	-0.4804	612.5897436	0.042074799	-0.048042402	20	0	14.0005	36.5211	0
361	3.7096	47.91	73.486	2.1041	-0.4806	614.2820513	0.042082349	-0.048055802	20	0	14.0001	36.5211	0
362	3.7097	48.04	73.526	2.1045	-0.4806	615.9487179	0.042090499	-0.048058202	20	0	14.0005	36.5211	0
363	3.7098	48.16	73.569	2.105	-0.4806	617.4358974	0.042100549	-0.048055002	20	0	14.0005	36.5211	0
364	3.7098	48.29	73.611	2.1053	-0.4804	619.1025641	0.042106199	-0.048038602	20	0	14.0001	36.5211	0
365	3.7099	48.39	73.651	2.1056	-0.4804	620.3846154	0.042112499	-0.048037802	20	0	13.9997	36.5211	0
366	3.71	48.52	73.694	2.106	-0.4802	622.0512821	0.042120049	-0.048021202	20	0	14.0001	36.521	0
367	3.7101	48.65	73.736	2.1064	-0.4803	623.7435897	0.042128849	-0.048026802	20	0	13.9997	36.521	0
368	3.7102	48.77	73.776	2.1068	-0.4802	625.2307692	0.042136999	-0.048019602	20	0	14.0005	36.5207	0
369	3.7103	48.9	73.818	2.1072	-0.4802	626.8974359	0.042143949	-0.048018002	20	0	14.0001	36.5204	0
370	3.7104	49.01	73.857	2.1076	-0.4801	628.3846154	0.042151499	-0.048011802	20	0	14.0005	36.5204	0
371	3.7104	49.16	73.9	2.108	-0.4801	630.2820513	0.042160299	-0.048005402	20	0	13.9997	36.5205	0
372	3.7106	49.41	73.982	2.1088	-0.48	633.4358974	0.042175349	-0.047998402	20	0	14.0001	36.521	0
373	3.7107	49.54	74.026	2.1092	-0.4798	635.1282051	0.042183549	-0.047984202	20	0	13.9993	36.5212	0
374	3.7108	49.65	74.068	2.1096	-0.4798	636.5897436	0.042191699	-0.047981802	20	0	14.0001	36.5214	0
375	3.7109	49.79	74.109	2.1099	-0.4799	638.2820513	0.042197999	-0.047991202	20	0	13.9997	36.5214	0
376	3.711	49.9	74.151	2.1103	-0.4799	639.7435897	0.042206199	-0.047989802	20	0	14.0005	36.5214	0
377	3.7111	50.03	74.191	2.1107	-0.4796	641.4358974	0.042214349	-0.047956602	20	0	13.9997	36.5216	0
378	3.7111	50.16	74.233	2.1111	-0.4794	643.1282051	0.042221899	-0.047940802	20	0	13.9997	36.5216	0
379	3.7112	50.29	74.276	2.1115	-0.4793	644.7948718	0.042230699	-0.047926602	20	0	14.0001	36.5216	0
380	3.7114	50.51	74.358	2.1122	-0.4792	647.5384615	0.042244549	-0.047920402	20	0	14.0005	36.5213	0
381	3.7115	50.66	74.4	2.1126	-0.4794	649.4358974	0.042252049	-0.047935402	20	0	14.0005	36.5211	0
382	3.7116	50.79	74.44	2.113	-0.4791	651.1282051	0.042259599	-0.047909402	20	0	14.0009	36.5206	0
383	3.7117	50.92	74.482	2.1135	-0.479	652.8205128	0.042269049	-0.047897602	20	0	14.0005	36.5201	0
384	3.7117	51.05	74.522	2.1138	-0.4789	654.4871795	0.042276599	-0.047890402	20	0	14.0005	36.5196	0
385	3.7118	51.17	74.564	2.1143	-0.4788	655.974359	0.042285399	-0.047882602	20	0	14.0001	36.5195	0
386	3.7119	51.28	74.606	2.1146	-0.4788	657.4358974	0.042292299	-0.047881802	20	0	14.0001	36.5195	0
387	3.712	51.41	74.646	2.115	-0.4787	659.1282051	0.042300499	-0.047874802	20	0	14.0001	36.5196	0
388	3.7121	51.53	74.688	2.1155	-0.479	660.5897436	0.042309299	-0.047900002	20	0	14.0001	36.5198	0
389	3.7122	51.69	74.73	2.1158	-0.4788	662.7179487	0.042316199	-0.047883402	20	0	14.0005	36.52	0
390	3.7124	51.9	74.811	2.1167	-0.4785	665.4358974	0.042333149	-0.047850202	20	0	14.0001	36.5202	0
391	3.7124	52.04	74.853	2.1171	-0.4786	667.1282051	0.042341349	-0.047855802	20	0	13.9997	36.5202	0
392	3.7125	52.15	74.893	2.1174	-0.4785	668.5897436	0.042348249	-0.047852602	20	0	13.9997	36.5204	0
393	3.7126	52.28	74.935	2.1178	-0.4784	670.2820513	0.042356449	-0.047844802	20	0	14.0005	36.5204	0
394	3.7127	52.4	74.974	2.1183	-0.4785	671.7692308	0.042365249	-0.047847202	20	0	14.0005	36.5203	0
395	3.7128	52.55	75.015	2.1186	-0.4781	673.6666667	0.042372799	-0.047812402	20	0	14.0005	36.5203	0
396	3.7129	52.68	75.057	2.119	-0.4782	675.3333333	0.042380949	-0.047823402	20	0	14.0001	36.5201	0
397	3.713	52.79	75.096	2.1195	-0.4781	676.8205128	0.042389749	-0.047807002	20	0	14.0005	36.5199	0
398	3.7131	52.91	75.138	2.1199	-0.4782	678.2820513	0.042397949	-0.047822002	20	0	14.0013	36.5196	0
399	3.7131	53.04	75.179	2.1203	-0.478	679.974359	0.042405449	-0.047798202	20	0	14.0005	36.5191	0
400	3.7132	53.17	75.219	2.1207	-0.478	681.6666667	0.042413649	-0.047802202	20	0	14.0001	36.5189	0
401	3.7133	53.3	75.26	2.1211	-0.4779	683.3333333	0.042421199	-0.047787202	20	0	13.9997	36.5188	0
402	3.7134	53.42	75.3	2.1214	-0.478	684.8205128	0.042428749	-0.047796002	20	0	13.9993	36.5189	0
403	3.7135	53.53	75.342	2.1219	-0.4777	686.2820513	0.042437549	-0.047766802	20	0	13.9993	36.5191	0
404	3.7136	53.66	75.384	2.1223	-0.4778	687.974359	0.042446349	-0.047776202	20	0	13.9997	36.5194	0
405	3.7137	53.79	75.422	2.1228	-0.4776	689.6666667	0.042455749	-0.047762802	20	0	14.0005	36.5197	0
406	3.7137	53.94	75.465	2.1231	-0.4775	691.5641026	0.042462699	-0.047749402	20	0	14.0001	36.5199	0
407	3.7139	54.15	75.545	2.1239	-0.4774	694.2820513	0.042478399	-0.047736002	20	0	14.0001	36.5205	0
408	3.7141	54.42	75.625	2.1248	-0.4773	697.6666667	0.042495999	-0.047727402	20	0	13.9997	36.5206	0
409	3.7143	54.66	75.709	2.1256	-0.4772	700.8205128	0.042512349	-0.047718802	20	0	14.0005	36.5206	0
410	3.7144	54.78	75.748	2.126	-0.477	702.3076923	0.042519899	-0.047704602	20	0	14.0005	36.5205	0
411	3.7144	54.89	75.789	2.1264	-0.477	703.7692308	0.042527449	-0.047701402	20	0	14.0005	36.5205	0
412	3.7145	55.03	75.827	2.1268	-0.4769	705.4615385	0.042536249	-0.047688802	20	0	14.0005	36.5204	0
413	3.7146	55.17	75.869	2.1273	-0.4769	707.3589744	0.042545649	-0.047692002	20	0	14.0009	36.5201	0
414	3.7147	55.29	75.91	2.1277	-0.4767	708.8205128	0.042553849	-0.047666802	20	0	14.0001	36.5198	0
415	3.7148	55.4	75.949	2.1281	-0.4766	710.3076923	0.042561999	-0.047655002	20	0	14.0009	36.5194	0
416	3.7149	55.53	75.99	2.1285	-0.4766	711.974359	0.042569549	-0.047655802	20	0	14.0005	36.5189	0
417	3.715	55.67	76.031	2.129	-0.4765	713.6666667	0.042580249	-0.047647002	20	0	14.0005	36.5186	0
418	3.715	55.78	76.069	2.1293	-0.4763	715.1538462	0.042585899	-0.047632802	20	0	14.0005	36.5183	0
419	3.7151	55.91	76.11	2.1297	-0.4764	716.8205128	0.042594699	-0.047640802	20	0	14.0001	36.5181	0
420	3.7152	56.06	76.151	2.1301	-0.4763	718.7179487	0.042602899	-0.047632802	20	0	14.0005	36.5181	0
421	3.7153	56.18	76.189	2.1306	-0.4762	720.2051282	0.042611049	-0.047617802	20	0	13.9997	36.5181	0
422	3.7154	56.29	76.231	2.131	-0.4762	721.6666667	0.042619849	-0.047615602	20	0	13.9997	36.5182	0
423	3.7155	56.42	76.269	2.1314	-0.4761	723.3589744	0.042627399	-0.047607602	20	0	13.9993	36.5186	0
424	3.7156	56.54	76.311	2.1317	-0.476	724.8205128	0.042634299	-0.047602202	20	0	13.9997	36.5189	0
425	3.7157	56.65	76.352	2.1323	-0.476	726.3076923	0.042646249	-0.047595802	20	0	14.0001	36.5192	0
426	3.7157	56.8	76.39	2.1327	-0.476	728.2051282	0.042653149	-0.047602202	20	0	13.9997	36.5195	0
427	3.7158	56.91	76.431	2.1331	-0.4757	729.6666667	0.042661949	-0.047573802	20	0	13.9997	36.5198	0
428	3.7159	57.03	76.469	2.1336	-0.476	731.1538462	0.042671399	-0.047599002	20	0	14.0001	36.52	0
429	3.716	57.18	76.509	2.1339	-0.4757	733.0512821	0.042678299	-0.047571402	20	0	13.9997	36.5201	0
430	3.7161	57.29	76.55	2.1344	-0.4756	734.5128205	0.042688399	-0.047561202	20	0	13.9993	36.5203	0
431	3.7162	57.41	76.587	2.1348	-0.4754	736	0.042695299	-0.047542202	20	0	13.9997	36.5203	0
432	3.7163	57.57	76.628	2.1351	-0.4755	738.1025641	0.042702849	-0.047550202	20	0	14.0001	36.5204	0
433	3.7164	57.8	76.706	2.1361	-0.4754	741.0512821	0.042721049	-0.047539202	20	0	14.0001	36.5206	0
434	3.7165	57.95	76.747	2.1364	-0.4751	742.9487179	0.042728599	-0.047506802	20	0	14.0005	36.5204	0
435	3.7166	58.08	76.785	2.1368	-0.4751	744.6153846	0.042736149	-0.047507602	20	0	14.0001	36.5202	0
436	3.7167	58.18	76.826	2.1372	-0.475	745.8974359	0.042744949	-0.047499002	20	0	14.0009	36.5201	0
437	3.7169	58.43	76.905	2.1382	-0.4748	749.0512821	0.042763199	-0.047475402	20	0	14.0005	36.5197	0
438	3.717	58.54	76.946	2.1386	-0.4748	750.5128205	0.042771999	-0.047480802	20	0	14.0009	36.5194	0
439	3.717	58.67	76.986	2.1389	-0.4747	752.2051282	0.042778899	-0.047474602	20	0	14.0013	36.5189	0
440	3.7171	58.79	77.024	2.1395	-0.4747	753.6666667	0.042790849	-0.047466602	20	0	14.0009	36.5183	0
441	3.7172	58.92	77.065	2.1398	-0.4747	755.3589744	0.042796499	-0.047469002	20	0	14.0013	36.5179	0
442	3.7174	59.18	77.143	2.1408	-0.4744	758.7435897	0.042815999	-0.047439802	20	0	14.0001	36.5174	0
443	3.7176	59.41	77.222	2.1416	-0.4743	761.6923077	0.042831099	-0.047429602	20	0	13.9997	36.5174	0
444	3.7177	59.56	77.264	2.142	-0.4741	763.5641026	0.042840499	-0.047413002	20	0	13.9997	36.5174	0
445	3.7177	59.67	77.303	2.1426	-0.4741	765.0512821	0.042851199	-0.047409202	20	0	14.0005	36.5175	0
446	3.7178	59.79	77.341	2.1428	-0.474	766.5128205	0.042856849	-0.047399602	20	0	13.9997	36.5177	0
447	3.7179	59.92	77.381	2.1433	-0.474	768.2051282	0.042866949	-0.047401202	20	0	14.0001	36.518	0
448	3.718	60.05	77.419	2.1438	-0.474	769.8974359	0.042876349	-0.047400402	20	0	13.9997	36.5182	0
449	3.7181	60.17	77.459	2.1442	-0.4738	771.3589744	0.042883899	-0.047376002	20	0	14.0001	36.5182	0
450	3.7182	60.3	77.5	2.1447	-0.4735	773.0512821	0.042893949	-0.047354002	20	0	14.0005	36.5183	0
451	3.7183	60.43	77.537	2.1451	-0.4735	774.7435897	0.042901499	-0.047352402	20	0	14.0001	36.5183	0
452	3.7183	60.56	77.578	2.1455	-0.4736	776.4102564	0.042909049	-0.047356402	20	0	13.9997	36.5182	0
453	3.7184	60.69	77.619	2.1459	-0.4735	778.1025641	0.042918499	-0.047347002	20	0	14.0001	36.5181	0
454	3.7185	60.81	77.656	2.1462	-0.4734	779.5897436	0.042924149	-0.047335802	20	0	14.0005	36.5179	0
455	3.7186	60.94	77.697	2.1467	-0.4733	781.2564103	0.042934799	-0.047325602	20	0	14.0005	36.5177	0
456	3.7187	61.05	77.737	2.147	-0.4732	782.7435897	0.042940499	-0.047321002	20	0	14.0005	36.5174	0
457	3.7188	61.19	77.775	2.1475	-0.4731	784.4358974	0.042949899	-0.047309802	20	0	14.0005	36.5171	0
458	3.7189	61.32	77.814	2.148	-0.473	786.1025641	0.042959949	-0.047297202	20	0	14.0005	36.517	0
459	3.719	61.56	77.892	2.1489	-0.473	789.2564103	0.042978849	-0.047295002	20	0	14.0001	36.5166	0
460	3.7191	61.66	77.932	2.1493	-0.4729	790.5384615	0.042986399	-0.047288602	20	0	13.9997	36.5166	0
461	3.7192	61.79	77.97	2.1498	-0.4728	792.2051282	0.042995199	-0.047279202	20	0	13.9989	36.5168	0
462	3.7193	61.94	78.01	2.1502	-0.4726	794.1025641	0.043003999	-0.047258602	20	0	13.9997	36.5171	0
463	3.7194	62.04	78.049	2.1506	-0.4725	795.3846154	0.043011499	-0.047249202	20	0	13.9997	36.5175	0
464	3.7195	62.2	78.089	2.151	-0.4723	797.4871795	0.043020949	-0.047232602	20	0	13.9997	36.5179	0
465	3.7196	62.43	78.167	2.1519	-0.4724	800.4358974	0.043038549	-0.047240602	20	0	14.0001	36.5186	0
466	3.7197	62.55	78.206	2.1523	-0.4723	801.8974359	0.043046099	-0.047233402	20	0	14.0001	36.5189	0
467	3.7198	62.68	78.246	2.1529	-0.4719	803.5897436	0.043057399	-0.047194002	20	0	13.9993	36.519	0
468	3.72	62.91	78.324	2.1537	-0.472	806.5384615	0.043073749	-0.047195602	20	0	14.0001	36.5196	0
469	3.7201	63.04	78.361	2.1542	-0.4718	808.2307692	0.043083199	-0.047184602	20	0	14.0005	36.5198	0
470	3.7202	63.21	78.402	2.1546	-0.4717	810.3333333	0.043091349	-0.047174402	20	0	14.0001	36.5198	0
471	3.7203	63.32	78.441	2.155	-0.4715	811.7948718	0.043100149	-0.047152402	20	0	14.0009	36.5199	0
472	3.7204	63.57	78.518	2.1559	-0.4714	814.9487179	0.043117149	-0.047137402	20	0	14.0001	36.5198	0
473	3.7206	63.8	78.595	2.1569	-0.4712	817.8974359	0.043137899	-0.047124802	20	0	14.0001	36.5198	0
474	3.7207	63.93	78.635	2.1572	-0.4712	819.5897436	0.043144199	-0.047118402	20	0	14.0001	36.5197	0
475	3.7208	64.06	78.673	2.1576	-0.4711	821.2820513	0.043152999	-0.047109002	20	0	14.0009	36.5197	0
476	3.7209	64.19	78.712	2.1581	-0.471	822.9487179	0.043161799	-0.047104202	20	0	13.9997	36.5195	0
477	3.721	64.29	78.752	2.1586	-0.4708	824.2307692	0.043171199	-0.047079802	20	0	14.0005	36.5194	0
478	3.721	64.4	78.789	2.1589	-0.4708	825.6923077	0.043178749	-0.047076802	20	0	14.0009	36.5191	0
479	3.7211	64.57	78.829	2.1594	-0.4706	827.7948718	0.043188799	-0.047060202	20	0	14.0005	36.5187	0
480	3.7212	64.68	78.869	2.1598	-0.4705	829.2820513	0.043195749	-0.047050002	20	0	14.0009	36.5183	0
481	3.7213	64.8	78.907	2.1603	-0.4705	830.7435897	0.043205149	-0.047050802	20	0	14.0017	36.518	0
482	3.7214	64.95	78.946	2.1608	-0.4703	832.6410256	0.043215199	-0.047031002	20	0	14.0005	36.5175	0
483	3.7216	65.18	79.024	2.1616	-0.4703	835.5897436	0.043231549	-0.047033402	20	0	14.0009	36.5165	0
484	3.7216	65.31	79.063	2.162	-0.4702	837.2820513	0.043240999	-0.047018402	20	0	14.0009	36.5161	0
485	3.7217	65.44	79.1	2.1626	-0.47	838.974359	0.043252949	-0.047001202	20	0	13.9997	36.5159	0
486	3.7219	65.67	79.179	2.1634	-0.47	841.9230769	0.043268649	-0.046996402	20	0	13.9997	36.5161	0
487	3.722	65.78	79.216	2.1639	-0.4698	843.3846154	0.043277449	-0.046982202	20	0	13.9997	36.5164	0
488	3.7221	65.93	79.256	2.1643	-0.4696	845.2820513	0.043286249	-0.046962602	20	0	14.0001	36.5166	0
489	3.7223	66.18	79.332	2.1653	-0.4693	848.4358974	0.043305099	-0.046931802	20	0	14.0001	36.5171	0
490	3.7223	66.29	79.373	2.1656	-0.4693	849.9230769	0.043312649	-0.046933402	20	0	13.9997	36.5173	0
491	3.7224	66.42	79.41	2.1662	-0.4693	851.5897436	0.043323349	-0.046928602	20	0	14.0005	36.5177	0
492	3.7225	66.54	79.45	2.1665	-0.4692	853.0769231	0.043330899	-0.046916802	20	0	14.0001	36.5178	0
493	3.7226	66.67	79.49	2.167	-0.4693	854.7692308	0.043340349	-0.046927802	20	0	14.0001	36.5179	0
494	3.7227	66.79	79.526	2.1675	-0.4692	856.2307692	0.043349749	-0.046922402	20	0	13.9997	36.518	0
495	3.7228	66.93	79.567	2.1679	-0.4689	858.1282051	0.043357949	-0.046894002	20	0	14.0001	36.5181	0
496	3.7229	67.07	79.605	2.1684	-0.4686	859.8205128	0.043367349	-0.046862402	20	0	14.0001	36.5183	0
497	3.7229	67.18	79.642	2.1688	-0.4687	861.2820513	0.043376149	-0.046866402	20	0	14.0005	36.5183	0
498	3.723	67.31	79.682	2.1694	-0.4686	862.974359	0.043387499	-0.046860002	20	0	14.0009	36.5182	0
499	3.7231	67.44	79.719	2.1697	-0.4684	864.6666667	0.043393749	-0.046836402	20	0	14.0009	36.518	0
500	3.7232	67.56	79.759	2.1702	-0.4683	866.1282051	0.043403199	-0.046827002	20	0	13.9997	36.5177	0
501	3.7233	67.67	79.798	2.1705	-0.4683	867.6153846	0.043410099	-0.046831002	20	0	14.0005	36.5173	0
502	3.7234	67.8	79.835	2.171	-0.4681	869.2820513	0.043420799	-0.046806602	20	0	14.0009	36.517	0
503	3.7235	67.97	79.874	2.1715	-0.468	871.3846154	0.043430249	-0.046800202	20	0	14.0009	36.5168	0
504	3.7236	68.18	79.949	2.1724	-0.4677	874.1282051	0.043448449	-0.046772602	20	0	14.0009	36.5158	0
505	3.7237	68.3	79.988	2.1729	-0.4677	875.6153846	0.043457249	-0.046771802	20	0	14.0001	36.5153	0
506	3.7239	68.56	80.065	2.1737	-0.4674	878.974359	0.043474849	-0.046742802	20	0	13.9997	36.5151	0
507	3.724	68.69	80.105	2.1742	-0.4675	880.6666667	0.043484899	-0.046753802	20	0	13.9997	36.5151	0
508	3.7242	68.94	80.18	2.1752	-0.4673	883.8205128	0.043503149	-0.046732402	20	0	13.9997	36.5157	0
509	3.7242	69.05	80.216	2.1756	-0.467	885.2820513	0.043511349	-0.046704202	20	0	14.0001	36.5161	0
510	3.7243	69.17	80.256	2.176	-0.4672	886.7692308	0.043520149	-0.046718402	20	0	14.0001	36.5161	0
511	3.7244	69.32	80.295	2.1765	-0.467	888.6666667	0.043530199	-0.046696202	20	0	14.0001	36.5162	0
512	3.7245	69.43	80.332	2.1769	-0.4668	890.1282051	0.043537749	-0.046682002	20	0	14.0001	36.5165	0
513	3.7246	69.55	80.371	2.1775	-0.4669	891.6153846	0.043549049	-0.046693802	20	0	14.0001	36.5166	0
514	3.7247	69.66	80.411	2.1779	-0.4666	893.0769231	0.043558499	-0.046655202	20	0	14.0001	36.5166	0
515	3.7248	69.81	80.447	2.1783	-0.4666	894.974359	0.043566649	-0.046664802	20	0	14.0005	36.5166	0
516	3.7249	69.94	80.486	2.1788	-0.4665	896.6666667	0.043576099	-0.046646602	20	0	14.0005	36.5166	0
517	3.7249	70.05	80.522	2.1792	-0.4662	898.1282051	0.043583649	-0.046623802	20	0	14.0005	36.5166	0
518	3.725	70.17	80.561	2.1797	-0.4661	899.6153846	0.043594299	-0.046614402	20	0	14.0001	36.5166	0
519	3.7251	70.33	80.601	2.1802	-0.466	901.7179487	0.043604999	-0.046604002	20	0	14.0001	36.5163	0
520	3.7253	70.56	80.676	2.1811	-0.4659	904.6666667	0.043621349	-0.046593002	20	0	14.0009	36.5158	0
521	3.7254	70.68	80.715	2.1816	-0.4659	906.1538462	0.043632049	-0.046585202	20	0	14.0013	36.5154	0
522	3.7255	70.81	80.752	2.1819	-0.4656	907.8205128	0.043638299	-0.046563202	20	0	14.0005	36.515	0
523	3.7256	70.93	80.791	2.1824	-0.4655	909.3076923	0.043648999	-0.046553602	20	0	14.0009	36.5147	0
524	3.7256	71.06	80.829	2.183	-0.4655	910.974359	0.043660349	-0.046545002	20	0	13.9997	36.5145	0
525	3.7257	71.19	80.866	2.1834	-0.4652	912.6666667	0.043667849	-0.046521402	20	0	14.0005	36.5145	0
526	3.7258	71.3	80.905	2.1838	-0.4652	914.1538462	0.043676649	-0.046516602	20	0	13.9997	36.5145	0
527	3.726	71.57	80.98	2.1847	-0.4651	917.5128205	0.043694299	-0.046507202	20	0	13.9993	36.5148	0
528	3.7261	71.68	81.019	2.1853	-0.465	918.974359	0.043705599	-0.046504802	20	0	14.0001	36.515	0
529	3.7262	71.8	81.056	2.1857	-0.465	920.4615385	0.043714399	-0.046497802	20	0	13.9997	36.5152	0
530	3.7262	71.91	81.096	2.1862	-0.4647	921.9230769	0.043723199	-0.046474202	20	0	14.0005	36.5155	0
531	3.7263	72.06	81.134	2.1867	-0.4646	923.8205128	0.043733249	-0.046457602	20	0	14.0005	36.5157	0
532	3.7264	72.17	81.171	2.1871	-0.4645	925.3076923	0.043742699	-0.046452002	20	0	13.9997	36.5158	0
533	3.7265	72.32	81.21	2.1876	-0.4646	927.2051282	0.043752099	-0.046463002	20	0	14.0001	36.5159	0
534	3.7266	72.44	81.247	2.1881	-0.4643	928.6666667	0.043762199	-0.046433202	20	0	14.0001	36.5159	0
535	3.7267	72.55	81.286	2.1884	-0.464	930.1538462	0.043768449	-0.046397002	20	0	13.9997	36.5159	0
536	3.7268	72.68	81.324	2.189	-0.4642	931.8205128	0.043779149	-0.046416602	20	0	14.0001	36.516	0
537	3.7269	72.8	81.361	2.1894	-0.4638	933.3076923	0.043788599	-0.046382802	20	0	14.0001	36.5159	0
538	3.7269	72.93	81.4	2.1899	-0.464	935	0.043797999	-0.046395402	20	0	14.0001	36.5159	0
539	3.727	73.06	81.439	2.1905	-0.4638	936.6666667	0.043809349	-0.046382002	20	0	14.0005	36.5159	0
540	3.7271	73.18	81.475	2.1908	-0.4636	938.1538462	0.043816849	-0.046361402	20	0	14.0001	36.5158	0
541	3.7272	73.32	81.514	2.1913	-0.4635	940.0512821	0.043826299	-0.046350402	20	0	14.0005	36.5158	0
542	3.7274	73.57	81.589	2.1923	-0.4633	943.2051282	0.043845149	-0.046326002	20	0	14.0001	36.5154	0
543	3.7275	73.7	81.629	2.1928	-0.4632	944.8974359	0.043855849	-0.046323602	20	0	14.0001	36.5152	0
544	3.7275	73.82	81.666	2.1933	-0.4632	946.3589744	0.043865299	-0.046317402	20	0	14.0009	36.5148	0
545	3.7276	73.95	81.704	2.1937	-0.4631	948.0512821	0.043873449	-0.046312602	20	0	14.0009	36.5143	0
546	3.7277	74.06	81.741	2.1942	-0.4629	949.5128205	0.043883499	-0.046290602	20	0	13.9997	36.5139	0
547	3.7278	74.18	81.779	2.1947	-0.4627	951	0.043893549	-0.046274002	20	0	14.0001	36.5138	0
548	3.7279	74.31	81.818	2.1951	-0.4627	952.6923077	0.043901749	-0.046269202	20	0	14.0001	36.5138	0
549	3.728	74.42	81.853	2.1955	-0.4627	954.1538462	0.043909899	-0.046272402	20	0	13.9993	36.514	0
550	3.7281	74.56	81.892	2.1961	-0.4626	955.8461538	0.043921249	-0.046263002	20	0	13.9993	36.5143	0
551	3.7282	74.7	81.931	2.1965	-0.4623	957.7435897	0.043930049	-0.046233002	20	0	13.9997	36.5147	0
552	3.7282	74.82	81.967	2.197	-0.4622	959.2051282	0.043939449	-0.046224402	20	0	13.9997	36.5148	0
553	3.7284	75.05	82.044	2.1979	-0.4619	962.1538462	0.043957049	-0.046192002	20	0	14.0001	36.5154	0
554	3.7285	75.2	82.079	2.1983	-0.4618	964.0512821	0.043965849	-0.046183402	20	0	13.9993	36.5156	0
555	3.7286	75.31	82.118	2.1987	-0.4618	965.5384615	0.043974049	-0.046177202	20	0	14.0001	36.5158	0
556	3.7287	75.43	82.154	2.1993	-0.4616	967	0.043985349	-0.046159002	20	0	14.0001	36.5162	0
557	3.7288	75.57	82.193	2.1997	-0.4615	968.8974359	0.043994799	-0.046150402	20	0	14.0001	36.5164	0
558	3.7289	75.8	82.268	2.2006	-0.4613	971.8461538	0.044012999	-0.046128202	20	0	14.0009	36.517	0
559	3.729	75.94	82.307	2.2012	-0.461	973.5384615	0.044023099	-0.046100002	20	0	14.0005	36.5169	0
560	3.7291	76.05	82.343	2.2016	-0.461	975	0.044031899	-0.046098402	20	0	14.0001	36.5168	0
561	3.7292	76.2	82.382	2.2021	-0.4613	976.8974359	0.044041949	-0.046133002	20	0	13.9997	36.5168	0
562	3.7293	76.31	82.42	2.2026	-0.461	978.3846154	0.044051349	-0.046101602	20	0	14.0005	36.5168	0
563	3.7294	76.44	82.456	2.2031	-0.461	980.0512821	0.044062049	-0.046103002	20	0	14.0013	36.5166	0
564	3.7295	76.56	82.494	2.2035	-0.4606	981.5384615	0.044070849	-0.046062202	20	0	13.9997	36.5163	0
565	3.7295	76.67	82.533	2.204	-0.4604	983	0.044079649	-0.046044002	20	0	14.0005	36.5161	0
566	3.7296	76.81	82.569	2.2045	-0.4603	984.6923077	0.044089099	-0.046029802	20	0	14.0009	36.5158	0
567	3.7297	76.94	82.608	2.2048	-0.4603	986.3846154	0.044096649	-0.046034602	20	0	14.0001	36.5153	0
568	3.7298	77.07	82.646	2.2054	-0.4601	988.0512821	0.044107949	-0.046014802	20	0	14.0001	36.5149	0
569	3.7299	77.18	82.682	2.2059	-0.46	989.5384615	0.044117399	-0.046004602	20	0	14.0005	36.5145	0
570	3.73	77.31	82.721	2.2063	-0.4601	991.2051282	0.044126799	-0.046009402	20	0	14.0005	36.5141	0
571	3.7301	77.43	82.756	2.2068	-0.4598	992.6923077	0.044136849	-0.045984202	20	0	14.0005	36.5137	0
572	3.7302	77.56	82.794	2.2074	-0.4598	994.3846154	0.044147549	-0.045980202	20	0	14.0001	36.5132	0
573	3.7302	77.69	82.833	2.2078	-0.4596	996.0512821	0.044156999	-0.045961202	20	0	13.9993	36.5131	0
574	3.7303	77.81	82.868	2.2083	-0.4596	997.5384615	0.044165799	-0.045955002	20	0	13.9997	36.5131	0
575	3.7304	77.92	82.907	2.2087	-0.4594	999	0.044174599	-0.045944802	20	0	13.9997	36.5133	0
576	3.7305	78.05	82.943	2.2092	-0.4595	1000.692308	0.044183399	-0.045947802	20	0	14.0001	36.5137	0
577	3.7306	78.19	82.981	2.2096	-0.4593	1002.384615	0.044192849	-0.045931402	20	0	13.9997	36.514	0
578	3.7307	78.32	83.02	2.2101	-0.4591	1004.051282	0.044202249	-0.045910802	20	0	14.0009	36.5142	0
579	3.7308	78.55	83.094	2.211	-0.4589	1007	0.044219849	-0.045892002	20	0	13.9997	36.5142	0
580	3.7309	78.69	83.132	2.2116	-0.4586	1008.897436	0.044231199	-0.045862802	20	0	14.0005	36.5143	0
581	3.7311	78.94	83.207	2.2125	-0.4584	1012.076923	0.044250649	-0.045840002	20	0	14.0009	36.5143	0
582	3.7312	79.07	83.242	2.213	-0.4584	1013.74359	0.044260099	-0.045840802	20	0	14.0001	36.5143	0
583	3.7313	79.2	83.28	2.2135	-0.4583	1015.435897	0.044270799	-0.045829002	20	0	13.9997	36.5143	0
584	3.7315	79.42	83.353	2.2144	-0.458	1018.179487	0.044288399	-0.045802202	20	0	13.9997	36.5141	0
585	3.7315	79.57	83.391	2.2149	-0.4579	1020.076923	0.044297199	-0.045792002	20	0	14.0001	36.5141	0
586	3.7316	79.68	83.43	2.2155	-0.4578	1021.538462	0.044309149	-0.045779402	20	0	14.0001	36.514	0
587	3.7317	79.84	83.465	2.2159	-0.4578	1023.641026	0.044317299	-0.045776202	20	0	14.0009	36.5139	0
588	3.7318	79.96	83.503	2.2163	-0.4576	1025.128205	0.044326099	-0.045761202	20	0	14.0009	36.5136	0
589	3.732	80.17	83.576	2.2173	-0.4572	1027.871795	0.044345599	-0.045717002	20	0	14.0005	36.513	0
590	3.7321	80.32	83.615	2.2178	-0.4572	1029.74359	0.044356899	-0.045723402	20	0	14.0001	36.5128	0
591	3.7321	80.44	83.65	2.2183	-0.4573	1031.230769	0.044365099	-0.045729002	20	0	14.0009	36.5125	0
592	3.7322	80.57	83.688	2.2188	-0.4571	1032.923077	0.044375149	-0.045706002	20	0	13.9993	36.5123	0
593	3.7323	80.7	83.726	2.2193	-0.4569	1034.589744	0.044385849	-0.045686402	20	0	13.9993	36.5125	0
594	3.7324	80.81	83.762	2.2198	-0.4567	1036.076923	0.044395249	-0.045674602	20	0	13.9993	36.5128	0
595	3.7325	80.95	83.8	2.2202	-0.4567	1037.769231	0.044403449	-0.045665002	20	0	13.9997	36.5132	0
596	3.7327	81.19	83.873	2.2212	-0.4565	1040.923077	0.044423549	-0.045648602	20	0	13.9993	36.5142	0
597	3.7328	81.32	83.911	2.2216	-0.4562	1042.589744	0.044432349	-0.045621802	20	0	13.9993	36.5147	0
598	3.7328	81.44	83.946	2.2222	-0.4562	1044.076923	0.044443049	-0.045620202	20	0	14.0001	36.5152	0
599	3.733	81.7	84.022	2.2231	-0.4558	1047.435897	0.044461899	-0.045584002	20	0	13.9997	36.5161	0
600	3.7331	81.82	84.057	2.2236	-0.4558	1048.923077	0.044471349	-0.045578402	20	0	14.0001	36.5165	0
601	3.7332	81.93	84.094	2.224	-0.4557	1050.384615	0.044480749	-0.045567402	20	0	13.9997	36.5166	0
602	3.7333	82.06	84.13	2.2245	-0.4555	1052.076923	0.044489549	-0.045549202	20	0	14.0005	36.5167	0
603	3.7334	82.19	84.167	2.2249	-0.4555	1053.769231	0.044498999	-0.045550002	20	0	14.0001	36.5167	0
604	3.7335	82.31	84.205	2.2255	-0.4552	1055.230769	0.044510299	-0.045523402	20	0	14.0001	36.5167	0
605	3.7335	82.44	84.241	2.2259	-0.4553	1056.923077	0.044518499	-0.045532002	20	0	14.0005	36.5166	0
606	3.7336	82.55	84.278	2.2265	-0.455	1058.384615	0.044529149	-0.045502802	20	0	14.0001	36.5166	0
607	3.7337	82.69	84.317	2.2269	-0.4549	1060.076923	0.044538599	-0.045486202	20	0	13.9997	36.5165	0
608	3.7338	82.83	84.352	2.2274	-0.4549	1061.974359	0.044548049	-0.045494202	20	0	14.0005	36.5165	0
609	3.734	83.06	84.425	2.2284	-0.4545	1064.923077	0.044567499	-0.045448402	20	0	14.0009	36.5163	0
610	3.7341	83.2	84.463	2.2289	-0.4544	1066.615385	0.044578199	-0.045442202	20	0	14.0005	36.5161	0
611	3.7341	83.33	84.5	2.2294	-0.4543	1068.282051	0.044587649	-0.045426402	20	0	14.0005	36.5158	0
612	3.7342	83.44	84.536	2.2298	-0.4542	1069.769231	0.044595799	-0.045423202	20	0	14.0005	36.5155	0
613	3.7343	83.59	84.573	2.2304	-0.4539	1071.666667	0.044607149	-0.045392602	20	0	14.0001	36.5151	0
614	3.7345	83.79	84.645	2.2312	-0.4538	1074.179487	0.044624749	-0.045381602	20	0	14.0009	36.5142	0
615	3.7346	83.93	84.682	2.2319	-0.4537	1076.076923	0.044637299	-0.045369002	20	0	14.0009	36.5136	0
616	3.7347	84.08	84.716	2.2323	-0.4536	1077.974359	0.044646099	-0.045362602	20	0	14.0013	36.513	0
617	3.7348	84.2	84.753	2.2327	-0.4534	1079.461538	0.044654299	-0.045340602	20	0	14.0013	36.5124	0
618	3.7348	84.31	84.791	2.2333	-0.4533	1080.923077	0.044666849	-0.045332602	20	0	14.0001	36.5119	0
619	3.7349	84.44	84.826	2.2338	-0.4532	1082.615385	0.044676299	-0.045324802	20	0	14.0001	36.5117	0
620	3.735	84.58	84.863	2.2343	-0.453	1084.307692	0.044685099	-0.045301202	20	0	13.9997	36.5118	0
621	3.7351	84.71	84.901	2.2348	-0.453	1085.974359	0.044695749	-0.045298802	20	0	13.9993	36.5123	0
622	3.7353	84.95	84.973	2.2357	-0.4527	1089.128205	0.044713999	-0.045266602	20	0	13.9993	36.5132	0
623	3.7354	85.07	85.009	2.2362	-0.4525	1090.615385	0.044724699	-0.045248402	20	0	13.9993	36.5136	0
624	3.7354	85.2	85.046	2.2366	-0.4525	1092.307692	0.044732849	-0.045250802	20	0	13.9993	36.5141	0
625	3.7355	85.31	85.084	2.2372	-0.4524	1093.769231	0.044743549	-0.045239002	20	0	13.9989	36.5147	0
626	3.7356	85.43	85.119	2.2376	-0.4522	1095.25641	0.044752999	-0.045216002	20	0	13.9997	36.5153	0
627	3.7357	85.56	85.156	2.2382	-0.4522	1096.923077	0.044763049	-0.045220802	20	0	14.0005	36.5158	0
628	3.7358	85.69	85.193	2.2387	-0.4519	1098.615385	0.044773099	-0.045194802	20	0	13.9997	36.5163	0
629	3.7359	85.82	85.228	2.2391	-0.4519	1100.307692	0.044781299	-0.045188602	20	0	14.0001	36.5167	0
630	3.736	85.94	85.265	2.2396	-0.4518	1101.769231	0.044792599	-0.045182202	20	0	14.0009	36.5168	0
631	3.7361	86.07	85.302	2.2401	-0.4516	1103.461538	0.044801999	-0.045155402	20	0	14.0001	36.5167	0
632	3.7361	86.18	85.336	2.2405	-0.4514	1104.923077	0.044810799	-0.045144402	20	0	14.0005	36.5168	0
633	3.7362	86.32	85.373	2.2411	-0.4513	1106.615385	0.044822149	-0.045130202	20	0	14.0005	36.5167	0
634	3.7363	86.46	85.408	2.2416	-0.4513	1108.512821	0.044832199	-0.045131802	20	0	14.0001	36.5166	0
635	3.7364	86.6	85.446	2.242	-0.4512	1110.205128	0.044840349	-0.045117602	20	0	14.0005	36.5164	0
636	3.7366	86.83	85.517	2.243	-0.451	1113.153846	0.044859249	-0.045095602	20	0	14.0009	36.5158	0
637	3.7367	86.96	85.554	2.2435	-0.4511	1114.820513	0.044869299	-0.045105802	20	0	14.0013	36.5153	0
638	3.7367	87.07	85.588	2.244	-0.4508	1116.307692	0.044880599	-0.045075802	20	0	14.0009	36.5146	0
639	3.7369	87.32	85.662	2.2451	-0.4504	1119.461538	0.044901349	-0.045038002	20	0	14.0013	36.5134	0
640	3.737	87.45	85.697	2.2455	-0.4502	1121.153846	0.044909549	-0.045019202	20	0	14.0005	36.5128	0
641	3.7371	87.56	85.734	2.2459	-0.4501	1122.615385	0.044917699	-0.045009002	20	0	14.0009	36.5122	0
642	3.7372	87.7	85.771	2.2465	-0.4501	1124.307692	0.044929649	-0.045009002	20	0	14.0005	36.5115	0
643	3.7373	87.81	85.806	2.247	-0.4501	1125.769231	0.044939699	-0.045005802	20	0	13.9993	36.511	0
644	3.7374	87.93	85.844	2.2475	-0.4498	1127.25641	0.044950399	-0.044980602	20	0	14.0005	36.5111	0
645	3.7374	88.09	85.879	2.2479	-0.4498	1129.358974	0.044958549	-0.044977402	20	0	13.9993	36.5114	0
646	3.7375	88.21	85.915	2.2484	-0.4497	1130.846154	0.044968599	-0.044973402	20	0	13.9997	36.5119	0
647	3.7377	88.44	85.987	2.2495	-0.4496	1133.794872	0.044989999	-0.044957802	20	0	14.0001	36.5125	0
648	3.7378	88.57	86.024	2.25	-0.4491	1135.461538	0.045000049	-0.044911202	20	0	13.9993	36.5128	0
649	3.738	88.81	86.095	2.251	-0.4488	1138.615385	0.045020799	-0.044879802	20	0	13.9997	36.5137	0
650	3.7381	88.94	86.132	2.2514	-0.4487	1140.307692	0.045028999	-0.044873402	20	0	14.0001	36.5139	0
651	3.7381	89.06	86.167	2.252	-0.4486	1141.794872	0.045039049	-0.044864802	20	0	14.0001	36.5142	0
652	3.7382	89.19	86.204	2.2525	-0.4484	1143.461538	0.045050349	-0.044840402	20	0	14.0001	36.5144	0
653	3.7383	89.31	86.24	2.253	-0.4484	1144.948718	0.045059799	-0.044842602	20	0	13.9997	36.5149	0
654	3.7384	89.45	86.275	2.2534	-0.4483	1146.846154	0.045068599	-0.044827802	20	0	14.0001	36.5149	0
655	3.7385	89.57	86.312	2.2541	-0.4482	1148.307692	0.045081149	-0.044816002	20	0	14.0005	36.515	0
656	3.7386	89.73	86.348	2.2545	-0.4478	1150.410256	0.045089949	-0.044782002	20	0	13.9997	36.515	0
657	3.7387	89.95	86.421	2.2555	-0.4476	1153.153846	0.045109449	-0.044760002	20	0	13.9997	36.515	0
658	3.7388	90.06	86.454	2.256	-0.4476	1154.641026	0.045119499	-0.044760802	20	0	14.0001	36.5148	0
659	3.7389	90.18	86.492	2.2565	-0.4474	1156.102564	0.045129549	-0.044741802	20	0	14.0005	36.5147	0
660	3.739	90.32	86.529	2.2571	-0.4473	1158	0.045142149	-0.044727602	20	0	14.0001	36.5146	0
661	3.7391	90.46	86.563	2.2575	-0.4468	1159.692308	0.045150299	-0.044681202	20	0	14.0001	36.5145	0
662	3.7393	90.72	86.637	2.2585	-0.4468	1163.051282	0.045169799	-0.044681202	20	0	14.0009	36.5141	0
663	3.7394	90.83	86.67	2.259	-0.4467	1164.538462	0.045179849	-0.044668602	20	0	14.0009	36.5139	0
664	3.7394	90.96	86.707	2.2595	-0.4464	1166.205128	0.045190549	-0.044641802	20	0	14.0009	36.5136	0
665	3.7395	91.06	86.741	2.26	-0.4463	1167.487179	0.045200599	-0.044631602	20	0	14.0005	36.5134	0
666	3.7396	91.21	86.778	2.2605	-0.4463	1169.384615	0.045209399	-0.044626802	20	0	14.0005	36.5131	0
667	3.7398	91.44	86.849	2.2615	-0.446	1172.307692	0.045230149	-0.044596202	20	0	14.0009	36.5125	0
668	3.7399	91.59	86.885	2.2619	-0.4458	1174.205128	0.045238949	-0.044579602	20	0	14.0001	36.5121	0
669	3.74	91.7	86.921	2.2624	-0.4457	1175.692308	0.045248999	-0.044571802	20	0	14.0005	36.5118	0
670	3.74	91.84	86.956	2.2629	-0.4455	1177.384615	0.045257799	-0.044551202	20	0	14.0009	36.5115	0
671	3.7401	91.95	86.992	2.2634	-0.4454	1178.846154	0.045268499	-0.044538602	20	0	14.0009	36.511	0
672	3.7402	92.08	87.026	2.2639	-0.4454	1180.538462	0.045277949	-0.044536202	20	0	14.0001	36.5105	0
673	3.7403	92.21	87.063	2.2644	-0.4452	1182.205128	0.045287999	-0.044519802	20	0	14.0001	36.5104	0
674	3.7405	92.43	87.133	2.2654	-0.4448	1184.948718	0.045308099	-0.044483402	20	0	14.0001	36.5105	0
675	3.7406	92.57	87.171	2.2659	-0.4447	1186.846154	0.045317549	-0.044471602	20	0	14.0001	36.5108	0
676	3.7407	92.71	87.207	2.2664	-0.4446	1188.538462	0.045328249	-0.044460602	20	0	13.9997	36.5111	0
677	3.7407	92.84	87.241	2.2669	-0.4445	1190.230769	0.045337649	-0.044451202	20	0	13.9997	36.5114	0
678	3.7409	93.07	87.313	2.2679	-0.4442	1193.179487	0.045357149	-0.044422802	20	0	13.9993	36.5122	0
679	3.741	93.2	87.349	2.2684	-0.4441	1194.846154	0.045368449	-0.044407002	20	0	13.9997	36.5126	0
680	3.7411	93.33	87.386	2.2691	-0.444	1196.538462	0.045381649	-0.044396802	20	0	14.0001	36.513	0
681	3.7412	93.46	87.421	2.2695	-0.4438	1198.230769	0.045389849	-0.044381002	20	0	14.0001	36.5132	0
682	3.7413	93.69	87.494	2.2705	-0.4437	1201.179487	0.045409949	-0.044367002	20	0	13.9997	36.5134	0
683	3.7414	93.81	87.528	2.2709	-0.4434	1202.641026	0.045418149	-0.044341602	20	0	13.9997	36.5134	0
684	3.7415	93.97	87.565	2.2714	-0.4431	1204.74359	0.045428799	-0.044312602	20	0	14.0005	36.5134	0
685	3.7416	94.07	87.599	2.2719	-0.443	1206.025641	0.045438899	-0.044300802	20	0	13.9997	36.5134	0
686	3.7417	94.2	87.635	2.2726	-0.443	1207.692308	0.045451449	-0.044295202	20	0	14.0005	36.5134	0
687	3.7418	94.33	87.672	2.273	-0.4428	1209.384615	0.045459649	-0.044277802	20	0	14.0001	36.5133	0
688	3.7419	94.46	87.706	2.2734	-0.4427	1211.076923	0.045468449	-0.044269202	20	0	14.0005	36.5132	0
689	3.742	94.71	87.78	2.2745	-0.4424	1214.230769	0.045489799	-0.044244002	20	0	14.0001	36.5129	0
690	3.7421	94.82	87.814	2.275	-0.4423	1215.692308	0.045499849	-0.044232202	20	0	14.0009	36.5128	0
691	3.7422	94.94	87.852	2.2755	-0.4422	1217.179487	0.045509899	-0.044220402	20	0	14.0005	36.5124	0
692	3.7423	95.05	87.886	2.2761	-0.4419	1218.641026	0.045521249	-0.044192002	20	0	14.0009	36.5121	0
693	3.7424	95.17	87.922	2.2765	-0.442	1220.128205	0.045530049	-0.044198402	20	0	14.0009	36.5116	0
694	3.7425	95.3	87.96	2.277	-0.4418	1221.794872	0.045539449	-0.044176202	20	0	14.0005	36.5111	0
695	3.7426	95.42	87.994	2.2775	-0.4419	1223.282051	0.045550799	-0.044188802	20	0	14.0005	36.5107	0
696	3.7427	95.56	88.03	2.2781	-0.4415	1225.179487	0.045561449	-0.044145602	20	0	14.0005	36.5104	0
697	3.7427	95.68	88.067	2.2785	-0.4412	1226.641026	0.045570299	-0.044123402	20	0	14.0005	36.5101	0
698	3.7428	95.83	88.101	2.2791	-0.4414	1228.538462	0.045581599	-0.044136002	20	0	14.0009	36.5099	0
699	3.7429	95.96	88.137	2.2795	-0.4409	1230.230769	0.045590999	-0.044091202	20	0	13.9993	36.5099	0
700	3.7431	96.22	88.209	2.2806	-0.4409	1233.589744	0.045611749	-0.044088802	20	0	13.9997	36.5102	0
701	3.7432	96.34	88.245	2.2811	-0.4408	1235.076923	0.045621849	-0.044080202	20	0	13.9993	36.5102	0
702	3.7433	96.45	88.28	2.2817	-0.4405	1236.538462	0.045633149	-0.044051002	20	0	13.9993	36.5105	0
703	3.7433	96.6	88.316	2.2823	-0.4403	1238.435897	0.045645699	-0.044025802	20	0	14.0005	36.5106	0
704	3.7434	96.7	88.353	2.2827	-0.4401	1239.717949	0.045653249	-0.044009202	20	0	13.9997	36.5107	0
705	3.7436	96.94	88.423	2.2838	-0.4399	1242.871795	0.045675899	-0.043994402	20	0	14.0005	36.5109	0
706	3.7437	97.06	88.457	2.2842	-0.4398	1244.333333	0.045683449	-0.043978602	20	0	13.9993	36.5112	0
707	3.7438	97.19	88.493	2.2847	-0.4397	1246.025641	0.045693499	-0.043967602	20	0	14.0001	36.5112	0
708	3.7439	97.32	88.529	2.2851	-0.4396	1247.717949	0.045701649	-0.043961202	20	0	13.9997	36.5112	0
709	3.744	97.45	88.564	2.2857	-0.4393	1249.384615	0.045714249	-0.043933602	20	0	14.0005	36.5113	0
710	3.744	97.58	88.6	2.2862	-0.4392	1251.076923	0.045724949	-0.043918602	20	0	14.0001	36.511	0
711	3.7441	97.7	88.635	2.2868	-0.439	1252.564103	0.045736249	-0.043903802	20	0	14.0009	36.5107	0
712	3.7442	97.81	88.669	2.2873	-0.4389	1254.025641	0.045745699	-0.043891202	20	0	14.0009	36.5104	0
713	3.7443	97.95	88.706	2.2878	-0.4388	1255.717949	0.045755099	-0.043884802	20	0	14.0005	36.5101	0
714	3.7444	98.06	88.739	2.2883	-0.4386	1257.179487	0.045765149	-0.043862002	20	0	14.0013	36.5098	0
715	3.7445	98.19	88.776	2.2887	-0.4384	1258.871795	0.045774599	-0.043843002	20	0	14.0005	36.5093	0
716	3.7446	98.34	88.813	2.2894	-0.4383	1260.769231	0.045788449	-0.043832002	20	0	14.0005	36.5091	0
717	3.7447	98.57	88.883	2.2903	-0.4382	1263.717949	0.045806649	-0.043817002	20	0	13.9993	36.5096	0
718	3.7448	98.68	88.92	2.291	-0.4382	1265.179487	0.045819249	-0.043815402	20	0	13.9993	36.5101	0
719	3.7449	98.82	88.954	2.2914	-0.4379	1266.871795	0.045828049	-0.043787202	20	0	14.0001	36.5106	0
720	3.745	98.96	88.991	2.2919	-0.4378	1268.769231	0.045837449	-0.043775402	20	0	13.9997	36.511	0
721	3.7452	99.19	89.061	2.2929	-0.4375	1271.717949	0.045857599	-0.043753202	20	0	13.9997	36.5119	0
722	3.7453	99.31	89.097	2.2934	-0.4374	1273.179487	0.045868899	-0.043736802	20	0	14.0001	36.5124	0
723	3.7453	99.42	89.132	2.2939	-0.4373	1274.666667	0.045878949	-0.043725602	20	0	13.9997	36.5126	0
724	3.7454	99.59	89.167	2.2944	-0.437	1276.769231	0.045888399	-0.043700402	20	0	13.9993	36.513	0
725	3.7455	99.7	89.203	2.295	-0.4368	1278.25641	0.045899699	-0.043677602	20	0	13.9997	36.5134	0
726	3.7456	99.83	89.237	2.2955	-0.4367	1279.923077	0.045909749	-0.043673602	20	0	13.9997	36.514	0
727	3.7458	100.08	89.307	2.2965	-0.4364	1283.076923	0.045930499	-0.043641402	20	0	14.0001	36.5144	0
728	3.7459	100.21	89.343	2.2972	-0.4363	1284.769231	0.045943099	-0.043628002	20	0	14.0001	36.5143	0
729	3.746	100.33	89.38	2.2977	-0.4362	1286.25641	0.045953749	-0.043624002	20	0	14.0001	36.5143	0
730	3.746	100.46	89.413	2.2981	-0.4361	1287.923077	0.045962599	-0.043612202	20	0	14.0001	36.5144	0
731	3.7461	100.59	89.45	2.2986	-0.4359	1289.615385	0.045972649	-0.043590202	20	0	14.0005	36.5144	0
732	3.7462	100.71	89.487	2.2992	-0.4359	1291.102564	0.045984599	-0.043591002	20	0	14.0001	36.5142	0
733	3.7463	100.84	89.52	2.2997	-0.4357	1292.769231	0.045993399	-0.043571202	20	0	13.9997	36.5142	0
734	3.7464	100.97	89.557	2.3002	-0.4353	1294.461538	0.046003449	-0.043534202	20	0	13.9993	36.5144	0
735	3.7466	101.21	89.627	2.3012	-0.4351	1297.615385	0.046024199	-0.043506602	20	0	14.0005	36.5141	0
736	3.7466	101.33	89.663	2.3018	-0.4349	1299.102564	0.046036149	-0.043494802	20	0	14.0009	36.5139	0
737	3.7467	101.44	89.696	2.3024	-0.4349	1300.564103	0.046047449	-0.043494802	20	0	14.0009	36.5136	0
738	3.7468	101.59	89.732	2.3028	-0.4347	1302.461538	0.046056249	-0.043466602	20	0	14.0009	36.5132	0
739	3.7469	101.71	89.769	2.3033	-0.4345	1303.923077	0.046066949	-0.043449202	20	0	14.0009	36.5127	0
740	3.747	101.85	89.802	2.3039	-0.4345	1305.820513	0.046078249	-0.043450002	20	0	14.0013	36.5122	0
741	3.7472	102.08	89.872	2.3049	-0.4342	1308.769231	0.046098999	-0.043420002	20	0	14.0005	36.5109	0
742	3.7473	102.2	89.907	2.3055	-0.4341	1310.25641	0.046109049	-0.043407402	20	0	14.0013	36.5104	0
743	3.7473	102.31	89.943	2.3059	-0.4337	1311.717949	0.046117249	-0.043371202	20	0	14.0005	36.5098	0
744	3.7474	102.46	89.977	2.3065	-0.4337	1313.615385	0.046129199	-0.043372802	20	0	14.0009	36.5094	0
745	3.7475	102.58	90.013	2.307	-0.4335	1315.102564	0.046140499	-0.043349202	20	0	14.0009	36.5089	0
746	3.7476	102.69	90.048	2.3075	-0.4333	1316.564103	0.046150549	-0.043331802	20	0	13.9997	36.5086	0
747	3.7477	102.82	90.082	2.308	-0.4334	1318.25641	0.046159999	-0.043336602	20	0	13.9997	36.5085	0
748	3.7478	102.96	90.118	2.3085	-0.4332	1319.948718	0.046170649	-0.043316802	20	0	13.9989	36.5087	0
749	3.7479	103.17	90.187	2.3096	-0.433	1322.666667	0.046191399	-0.043302602	20	0	13.9989	36.5095	0
750	3.748	103.3	90.223	2.3101	-0.4328	1324.358974	0.046202099	-0.043275002	20	0	13.9993	36.51	0
751	3.7481	103.46	90.257	2.3105	-0.4327	1326.461538	0.046210299	-0.043272002	20	0	13.9989	36.5104	0
752	3.7482	103.58	90.292	2.3111	-0.4324	1327.948718	0.046222199	-0.043238002	20	0	13.9993	36.5109	0
753	3.7483	103.69	90.329	2.3116	-0.4324	1329.410256	0.046232899	-0.043241202	20	0	13.9993	36.5114	0
754	3.7484	103.83	90.363	2.3122	-0.4322	1331.102564	0.046244249	-0.043220002	20	0	13.9993	36.5118	0
755	3.7485	103.94	90.398	2.3127	-0.432	1332.564103	0.046253049	-0.043204202	20	0	13.9993	36.5122	0
756	3.7486	104.09	90.432	2.3133	-0.4319	1334.461538	0.046265599	-0.043190002	20	0	13.9997	36.5126	0
757	3.7487	104.34	90.503	2.3143	-0.4316	1337.641026	0.046285699	-0.043157802	20	0	14.0005	36.5134	0
758	3.7488	104.45	90.537	2.3148	-0.4316	1339.102564	0.046296399	-0.043155402	20	0	13.9993	36.5137	0
759	3.7489	104.58	90.573	2.3154	-0.4312	1340.794872	0.046307699	-0.043119202	20	0	14.0001	36.5136	0
760	3.749	104.7	90.608	2.3159	-0.431	1342.25641	0.046317799	-0.043099402	20	0	14.0005	36.5137	0
761	3.7491	104.81	90.642	2.3164	-0.4311	1343.74359	0.046327849	-0.043105002	20	0	13.9997	36.5136	0
762	3.7492	104.96	90.678	2.317	-0.4309	1345.641026	0.046339799	-0.043087602	20	0	14.0001	36.5135	0
763	3.7492	105.07	90.711	2.3174	-0.4309	1347.102564	0.046348599	-0.043092402	20	0	14.0005	36.5135	0
764	3.7493	105.19	90.747	2.318	-0.4304	1348.589744	0.046359899	-0.043044202	20	0	14.0001	36.5133	0
765	3.7494	105.34	90.783	2.3185	-0.4302	1350.487179	0.046370599	-0.043021402	20	0	14.0005	36.5131	0
766	3.7495	105.45	90.817	2.3191	-0.4301	1351.948718	0.046381299	-0.043013602	20	0	14.0001	36.5126	0
767	3.7496	105.58	90.852	2.3195	-0.43	1353.641026	0.046390699	-0.043003402	20	0	14.0001	36.5123	0
768	3.7497	105.71	90.888	2.3202	-0.4296	1355.307692	0.046404549	-0.042961602	20	0	14.0005	36.5119	0
769	3.7498	105.83	90.921	2.3207	-0.4297	1356.794872	0.046413349	-0.042972602	20	0	14.0005	36.5115	0
770	3.7499	106.08	90.991	2.3216	-0.4293	1359.948718	0.046432199	-0.042929202	20	0	14.0005	36.5104	0
771	3.7501	106.32	91.063	2.3228	-0.4289	1363.102564	0.046455449	-0.042893802	20	0	14.0009	36.5095	0
772	3.7502	106.45	91.096	2.3232	-0.4286	1364.794872	0.046464249	-0.042862402	20	0	14.0009	36.509	0
773	3.7504	106.7	91.168	2.3244	-0.4285	1367.948718	0.046488799	-0.042852802	20	0	14.0005	36.508	0
774	3.7505	106.82	91.201	2.325	-0.4286	1369.435897	0.046499449	-0.042857602	20	0	14.0001	36.5079	0
775	3.7506	106.96	91.236	2.3255	-0.4283	1371.333333	0.046509549	-0.042834802	20	0	13.9993	36.508	0
776	3.7507	107.21	91.306	2.3265	-0.4281	1374.487179	0.046530899	-0.042813402	20	0	13.9997	36.5082	0
777	3.7509	107.44	91.375	2.3276	-0.4279	1377.435897	0.046552299	-0.042786002	20	0	13.9989	36.5088	0
778	3.751	107.59	91.412	2.3282	-0.4273	1379.333333	0.046563599	-0.042733202	20	0	14.0001	36.5092	0
779	3.7511	107.7	91.447	2.3287	-0.4273	1380.794872	0.046573649	-0.042733202	20	0	13.9993	36.5095	0
780	3.7512	107.82	91.48	2.3292	-0.4271	1382.282051	0.046583699	-0.042714202	20	0	13.9997	36.5099	0
781	3.7512	107.95	91.517	2.3299	-0.427	1383.948718	0.046597549	-0.042696202	20	0	13.9993	36.5102	0
782	3.7513	108.08	91.551	2.3303	-0.4268	1385.641026	0.046605099	-0.042679602	20	0	13.9993	36.5105	0
783	3.7515	108.34	91.622	2.3314	-0.4266	1389	0.046627749	-0.042662202	20	0	13.9997	36.5113	0
784	3.7516	108.44	91.656	2.3318	-0.4265	1390.282051	0.046636549	-0.042645002	20	0	13.9989	36.5114	0
785	3.7517	108.59	91.692	2.3324	-0.4264	1392.179487	0.046648449	-0.042635402	20	0	14.0001	36.5119	0
786	3.7518	108.72	91.727	2.333	-0.4261	1393.846154	0.046660399	-0.042608602	20	0	14.0005	36.512	0
787	3.7519	108.84	91.76	2.3336	-0.426	1395.333333	0.046672349	-0.042596002	20	0	14.0001	36.5122	0
788	3.752	109.07	91.829	2.3346	-0.4257	1398.282051	0.046691199	-0.042574802	20	0	14.0001	36.512	0
789	3.7521	109.2	91.863	2.3351	-0.4256	1399.974359	0.046702549	-0.042556602	20	0	14.0001	36.512	0
790	3.7522	109.34	91.899	2.3357	-0.4252	1401.846154	0.046713249	-0.042520402	20	0	13.9997	36.512	0
791	3.7523	109.46	91.933	2.3361	-0.4253	1403.333333	0.046722649	-0.042532202	20	0	14.0005	36.512	0
792	3.7524	109.57	91.969	2.3367	-0.425	1404.794872	0.046733349	-0.042500802	20	0	13.9997	36.512	0
793	3.7525	109.69	92.005	2.3373	-0.425	1406.282051	0.046745899	-0.042497602	20	0	14.0001	36.512	0
794	3.7525	109.84	92.038	2.3378	-0.4247	1408.179487	0.046755999	-0.042474802	20	0	14.0001	36.5119	0
795	3.7526	109.95	92.074	2.3383	-0.4247	1409.641026	0.046766049	-0.042473202	20	0	14.0001	36.5118	0
796	3.7527	110.07	92.107	2.3389	-0.4243	1411.128205	0.046777999	-0.042431402	20	0	14.0009	36.5118	0
797	3.7528	110.23	92.143	2.3394	-0.4243	1413.230769	0.046788049	-0.042429802	20	0	14.0005	36.5116	0
798	3.753	110.45	92.211	2.3405	-0.4241	1415.974359	0.046810649	-0.042411802	20	0	14.0005	36.5112	0
799	3.7531	110.56	92.247	2.3411	-0.424	1417.435897	0.046821349	-0.042397602	20	0	14.0001	36.5111	0
800	3.7532	110.71	92.282	2.3415	-0.4237	1419.333333	0.046830799	-0.042370002	20	0	14.0005	36.5107	0
801	3.7532	110.82	92.316	2.3421	-0.4236	1420.820513	0.046842749	-0.042355802	20	0	14.0005	36.5103	0
802	3.7533	110.97	92.351	2.3427	-0.4234	1422.717949	0.046854049	-0.042340802	20	0	14.0009	36.5099	0
803	3.7535	111.2	92.42	2.3437	-0.423	1425.641026	0.046874799	-0.042300602	20	0	14.0009	36.509	0
804	3.7536	111.33	92.456	2.3443	-0.4228	1427.333333	0.046885499	-0.042280202	20	0	14.0005	36.5086	0
805	3.7538	111.58	92.525	2.3454	-0.4226	1430.487179	0.046907499	-0.042255802	20	0	14.0005	36.5075	0
806	3.7538	111.71	92.561	2.3459	-0.4223	1432.179487	0.046917549	-0.042227402	20	0	14.0001	36.5072	0
807	3.7539	111.83	92.593	2.3465	-0.4222	1433.666667	0.046930099	-0.042224202	20	0	13.9993	36.5073	0
808	3.754	111.96	92.629	2.347	-0.422	1435.333333	0.046940199	-0.042200602	20	0	13.9997	36.5076	0
809	3.7542	112.22	92.698	2.348	-0.4216	1438.717949	0.046960299	-0.042163602	20	0	13.9989	36.5085	0
810	3.7544	112.43	92.768	2.3492	-0.4215	1441.435897	0.046983549	-0.042147002	20	0	13.9989	36.5095	0
811	3.7545	112.56	92.803	2.3497	-0.4214	1443.128205	0.046994249	-0.042140802	20	0	13.9993	36.51	0
812	3.7545	112.7	92.838	2.3502	-0.4211	1444.820513	0.047004949	-0.042111602	20	0	13.9997	36.5104	0
813	3.7546	112.83	92.871	2.3508	-0.4212	1446.512821	0.047016249	-0.042121002	20	0	14.0001	36.5113	0
814	3.7547	112.94	92.907	2.3513	-0.4209	1447.974359	0.047026299	-0.042090402	20	0	14.0005	36.511	0
815	3.7548	113.07	92.94	2.3519	-0.4207	1449.666667	0.047037649	-0.042072202	20	0	13.9993	36.511	0
816	3.7549	113.22	92.975	2.3524	-0.4204	1451.564103	0.047048949	-0.042041402	20	0	14.0009	36.5115	0
817	3.7551	113.45	93.044	2.3534	-0.4203	1454.512821	0.047067199	-0.042026602	20	0	14.0005	36.5116	0
818	3.7552	113.58	93.079	2.354	-0.4201	1456.179487	0.047080999	-0.042012402	20	0	14.0005	36.5117	0
819	3.7552	113.71	93.114	2.3547	-0.4197	1457.871795	0.047093599	-0.041974602	20	0	14.0001	36.5115	0
820	3.7553	113.83	93.148	2.3552	-0.4199	1459.358974	0.047103649	-0.041988002	20	0	14.0001	36.5112	0
821	3.7554	113.94	93.184	2.3557	-0.4193	1460.820513	0.047114949	-0.041929602	20	0	14.0005	36.511	0
822	3.7555	114.08	93.217	2.3561	-0.4192	1462.512821	0.047122499	-0.041921002	20	0	14.0009	36.5107	0
823	3.7556	114.21	93.253	2.3567	-0.4192	1464.179487	0.047133199	-0.041920202	20	0	14.0009	36.5104	0
824	3.7557	114.32	93.288	2.3573	-0.419	1465.666667	0.047145149	-0.041903602	20	0	14.0013	36.5101	0
825	3.7558	114.47	93.322	2.3577	-0.4189	1467.564103	0.047154549	-0.041887202	20	0	14.0013	36.5096	0
826	3.7558	114.58	93.356	2.3584	-0.4188	1469.025641	0.047168399	-0.041880802	20	0	14.0001	36.509	0
827	3.7559	114.7	93.392	2.3589	-0.4185	1470.512821	0.047177199	-0.041851602	20	0	14.0005	36.5086	0
828	3.756	114.85	93.425	2.3593	-0.4185	1472.410256	0.047186649	-0.041854802	20	0	14.0001	36.5084	0
829	3.7561	114.96	93.46	2.36	-0.4182	1473.871795	0.047199199	-0.041817802	20	0	14.0005	36.508	0
830	3.7562	115.08	93.493	2.3605	-0.4181	1475.358974	0.047209899	-0.041813002	20	0	14.0009	36.5073	0
831	3.7563	115.19	93.528	2.361	-0.418	1476.820513	0.047220599	-0.041798002	20	0	14.0001	36.5067	0
832	3.7564	115.32	93.564	2.3616	-0.4178	1478.512821	0.047231249	-0.041779202	20	0	13.9997	36.5066	0
833	3.7565	115.44	93.596	2.3621	-0.4177	1479.974359	0.047241949	-0.041766602	20	0	13.9993	36.5067	0
834	3.7565	115.59	93.631	2.3627	-0.4173	1481.871795	0.047253249	-0.041727202	20	0	13.9993	36.5071	0
835	3.7566	115.7	93.667	2.3632	-0.4172	1483.358974	0.047264599	-0.041724002	20	0	14.0001	36.5075	0
836	3.7567	115.83	93.7	2.3637	-0.4172	1485.025641	0.047274649	-0.041724802	20	0	13.9997	36.5078	0
837	3.7568	115.96	93.734	2.3643	-0.4171	1486.717949	0.047285949	-0.041706802	20	0	13.9993	36.5081	0
838	3.7569	116.08	93.767	2.3648	-0.417	1488.205128	0.047296649	-0.041697202	20	0	14.0001	36.5085	0
839	3.757	116.19	93.803	2.3654	-0.4167	1489.666667	0.047307349	-0.041668802	20	0	13.9993	36.509	0
840	3.7571	116.31	93.838	2.3659	-0.4165	1491.153846	0.047318649	-0.041646002	20	0	14.0001	36.5091	0
841	3.7571	116.44	93.87	2.3665	-0.4163	1492.820513	0.047329349	-0.041625602	20	0	13.9997	36.5095	0
842	3.7572	116.56	93.906	2.3669	-0.4161	1494.307692	0.047338749	-0.041609802	20	0	13.9997	36.5096	0
843	3.7573	116.72	93.941	2.3676	-0.4159	1496.410256	0.047351949	-0.041594002	20	0	14.0001	36.5098	0
844	3.7574	116.83	93.974	2.3682	-0.4158	1497.871795	0.047364549	-0.041580602	20	0	13.9989	36.5102	0
845	3.7575	116.97	94.009	2.3687	-0.4157	1499.564103	0.047373349	-0.041572002	20	0	14.0001	36.5106	0
846	3.7577	117.2	94.078	2.3696	-0.4155	1502.512821	0.047392849	-0.041545202	20	0	13.9993	36.5109	0
847	3.7578	117.34	94.114	2.3703	-0.4152	1504.410256	0.047406649	-0.041519202	20	0	13.9997	36.5112	0
848	3.7578	117.46	94.146	2.3709	-0.4153	1505.897436	0.047417999	-0.041530202	20	0	13.9997	36.5113	0
849	3.7579	117.59	94.181	2.3714	-0.4147	1507.564103	0.047427399	-0.041473602	20	0	14.0001	36.5116	0
850	3.758	117.71	94.217	2.372	-0.4148	1509.051282	0.047439999	-0.041483002	20	0	13.9997	36.5121	0
851	3.7581	117.82	94.249	2.3725	-0.4148	1510.512821	0.047450049	-0.041479802	20	0	14.0001	36.512	0
852	3.7582	117.95	94.285	2.3731	-0.4144	1512.205128	0.047461999	-0.041438002	20	0	14.0005	36.5119	0
853	3.7583	118.07	94.318	2.3736	-0.4143	1513.666667	0.047472049	-0.041427802	20	0	14.0005	36.5119	0
854	3.7584	118.2	94.353	2.3742	-0.4142	1515.358974	0.047483999	-0.041422402	20	0	14.0005	36.5117	0
855	3.7585	118.33	94.388	2.3748	-0.4139	1517.051282	0.047495949	-0.041388402	20	0	14.0001	36.5117	0
856	3.7586	118.58	94.457	2.3759	-0.4134	1520.205128	0.047517299	-0.041337202	20	0	14.0005	36.5109	0
857	3.7587	118.72	94.491	2.3763	-0.4133	1522.102564	0.047526099	-0.041327002	20	0	14.0009	36.5105	0
858	3.7589	118.95	94.559	2.3775	-0.4132	1525.051282	0.047549399	-0.041316802	20	0	14.0009	36.5095	0
859	3.759	119.07	94.593	2.378	-0.4128	1526.512821	0.047560049	-0.041280602	20	0	14.0009	36.5089	0
860	3.7591	119.2	94.628	2.3786	-0.4127	1528.205128	0.047572649	-0.041265602	20	0	14.0005	36.5085	0
861	3.7591	119.33	94.663	2.3792	-0.4125	1529.897436	0.047583349	-0.041250602	20	0	14.0005	36.5082	0
862	3.7592	119.45	94.696	2.3797	-0.4125	1531.358974	0.047593399	-0.041246602	20	0	14.0009	36.5078	0
863	3.7593	119.58	94.731	2.3802	-0.4123	1533.051282	0.047604699	-0.041234002	20	0	14.0009	36.5072	0
864	3.7594	119.69	94.766	2.3809	-0.4121	1534.512821	0.047617299	-0.041210402	20	0	14.0005	36.5068	0
865	3.7595	119.84	94.798	2.3813	-0.4119	1536.410256	0.047626099	-0.041187602	20	0	14.0001	36.5064	0
866	3.7597	120.07	94.867	2.3825	-0.4117	1539.358974	0.047649349	-0.041172602	20	0	13.9993	36.5063	0
867	3.7598	120.2	94.901	2.3831	-0.4115	1541.051282	0.047662549	-0.041147402	20	0	13.9997	36.5063	0
868	3.7598	120.35	94.936	2.3837	-0.4115	1542.948718	0.047673849	-0.041150602	20	0	13.9997	36.5064	0
869	3.76	120.58	95.004	2.3847	-0.4109	1545.897436	0.047693999	-0.041087602	20	0	13.9997	36.5069	0
870	3.7601	120.69	95.039	2.3853	-0.4107	1547.358974	0.047705899	-0.041072602	20	0	14.0001	36.5074	0
871	3.7602	120.83	95.071	2.3857	-0.4105	1549.051282	0.047714699	-0.041048202	20	0	13.9993	36.5077	0
872	3.7603	120.96	95.107	2.3864	-0.4104	1550.74359	0.047727949	-0.041035602	20	0	14.0001	36.5079	0
873	3.7604	121.07	95.14	2.3869	-0.4102	1552.205128	0.047738599	-0.041020602	20	0	13.9993	36.5083	0
874	3.7604	121.2	95.174	2.3874	-0.4101	1553.897436	0.047748649	-0.041010402	20	0	13.9993	36.5087	0
875	3.7605	121.35	95.209	2.388	-0.4099	1555.794872	0.047760599	-0.040986802	20	0	13.9997	36.5087	0
876	3.7607	121.61	95.278	2.3892	-0.4096	1559.153846	0.047783249	-0.040961602	20	0	14.0005	36.5091	0
877	3.7609	121.84	95.346	2.3902	-0.409	1562.102564	0.047803999	-0.040900002	20	0	13.9997	36.5094	0
878	3.761	121.96	95.381	2.3908	-0.4088	1563.589744	0.047816549	-0.040884402	20	0	14.0005	36.5095	0
879	3.7611	122.09	95.415	2.3913	-0.4087	1565.282051	0.047826649	-0.040874802	20	0	14.0005	36.5094	0
880	3.7611	122.21	95.449	2.3919	-0.4087	1566.74359	0.047838599	-0.040873202	20	0	14.0001	36.5094	0
881	3.7613	122.44	95.518	2.393	-0.4084	1569.692308	0.047860599	-0.040840202	20	0	14.0005	36.5094	0
882	3.7614	122.6	95.553	2.3934	-0.4082	1571.794872	0.047868749	-0.040822802	20	0	14.0001	36.5094	0
883	3.7615	122.72	95.587	2.3941	-0.4078	1573.282051	0.047881949	-0.040784202	20	0	14.0005	36.5093	0
884	3.7616	122.83	95.619	2.3946	-0.408	1574.74359	0.047891399	-0.040799202	20	0	14.0005	36.5093	0
885	3.7617	123.08	95.688	2.3956	-0.4078	1577.897436	0.047912749	-0.040775602	20	0	13.9997	36.5092	0
886	3.7618	123.21	95.723	2.3962	-0.4074	1579.589744	0.047924699	-0.040737002	20	0	13.9997	36.509	0
887	3.7619	123.34	95.758	2.3967	-0.4073	1581.282051	0.047933499	-0.040725202	20	0	14.0001	36.5088	0
888	3.762	123.45	95.792	2.3972	-0.407	1582.74359	0.047944799	-0.040696002	20	0	14.0013	36.5085	0
889	3.7621	123.57	95.826	2.3978	-0.4067	1584.230769	0.047956749	-0.040674002	20	0	14.0005	36.5081	0
890	3.7622	123.72	95.861	2.3985	-0.4067	1586.128205	0.047969349	-0.040666202	20	0	14.0001	36.5077	0
891	3.7623	123.83	95.894	2.3991	-0.4066	1587.589744	0.047981299	-0.040655002	20	0	14.0009	36.507	0
892	3.7624	123.95	95.929	2.3996	-0.4065	1589.076923	0.047991349	-0.040648802	20	0	13.9997	36.5065	0
893	3.7624	124.08	95.962	2.4001	-0.4062	1590.74359	0.048002049	-0.040615602	20	0	14.0005	36.506	0
894	3.7625	124.19	95.996	2.4006	-0.406	1592.230769	0.048012699	-0.040600002	20	0	13.9997	36.5057	0
895	3.7626	124.33	96.031	2.4013	-0.406	1593.923077	0.048025299	-0.040598402	20	0	14.0001	36.5057	0
896	3.7627	124.46	96.064	2.4018	-0.4057	1595.589744	0.048035349	-0.040573202	20	0	13.9997	36.5057	0
897	3.7628	124.57	96.099	2.4023	-0.4056	1597.076923	0.048046649	-0.040560602	20	0	13.9997	36.5058	0
898	3.7629	124.72	96.134	2.403	-0.4052	1598.974359	0.048059249	-0.040522802	20	0	13.9993	36.5059	0
899	3.763	124.83	96.167	2.4036	-0.4053	1600.435897	0.048071199	-0.040530602	20	0	13.9997	36.5063	0
900	3.7631	124.97	96.202	2.4041	-0.4049	1602.128205	0.048081899	-0.040493602	20	0	13.9993	36.5064	0
901	3.7631	125.08	96.235	2.4046	-0.405	1603.589744	0.048091949	-0.040496002	20	0	14.0001	36.5066	0
902	3.7632	125.2	96.27	2.4051	-0.4046	1605.076923	0.048102599	-0.040455002	20	0	13.9997	36.5067	0
903	3.7633	125.33	96.305	2.4058	-0.4046	1606.74359	0.048115849	-0.040456602	20	0	14.0001	36.5068	0
904	3.7634	125.46	96.338	2.4063	-0.4043	1608.435897	0.048125899	-0.040434602	20	0	14.0005	36.5072	0
905	3.7635	125.57	96.372	2.4069	-0.4043	1609.923077	0.048137849	-0.040425002	20	0	14.0001	36.5072	0
906	3.7636	125.72	96.407	2.4075	-0.4041	1611.820513	0.048149749	-0.040410002	20	0	14.0001	36.5072	0
907	3.7637	125.93	96.475	2.4086	-0.4037	1614.538462	0.048171799	-0.040374602	20	0	14.0001	36.5075	0
908	3.7638	126.08	96.508	2.4092	-0.4036	1616.435897	0.048183099	-0.040355802	20	0	14.0001	36.5077	0
909	3.7639	126.21	96.542	2.4097	-0.4034	1618.128205	0.048194399	-0.040338402	20	0	13.9993	36.5078	0
910	3.764	126.33	96.577	2.4102	-0.4033	1619.589744	0.048204449	-0.040325802	20	0	13.9997	36.5079	0
911	3.7641	126.44	96.61	2.4106	-0.4031	1621.076923	0.048212649	-0.040310002	20	0	14.0005	36.5082	0
912	3.7642	126.59	96.644	2.4114	-0.4029	1622.974359	0.048227099	-0.040293602	20	0	14.0005	36.5081	0
913	3.7644	126.82	96.714	2.4125	-0.4026	1625.923077	0.048249749	-0.040257202	20	0	14.0001	36.5081	0
914	3.7644	126.95	96.748	2.4131	-0.4024	1627.615385	0.048261699	-0.040243002	20	0	13.9993	36.508	0
915	3.7645	127.08	96.78	2.4137	-0.4024	1629.282051	0.048273649	-0.040243802	20	0	13.9997	36.5078	0
916	3.7647	127.35	96.851	2.4147	-0.402	1632.666667	0.048294349	-0.040200602	20	0	14.0001	36.5077	0
917	3.7648	127.46	96.883	2.4153	-0.4016	1634.128205	0.048306299	-0.040163602	20	0	14.0009	36.5075	0
918	3.7649	127.58	96.918	2.4158	-0.4017	1635.615385	0.048316399	-0.040167402	20	0	14.0009	36.5071	0
919	3.765	127.71	96.954	2.4165	-0.4014	1637.282051	0.048329599	-0.040136802	20	0	14.0001	36.5068	0
920	3.765	127.81	96.986	2.417	-0.4012	1638.564103	0.048339649	-0.040116202	20	0	14.0009	36.5065	0
921	3.7651	127.92	97.022	2.4176	-0.4009	1640.025641	0.048352849	-0.040089402	20	0	14.0001	36.5063	0
922	3.7652	128.09	97.056	2.4182	-0.401	1642.128205	0.048364149	-0.040101202	20	0	14.0005	36.5061	0
923	3.7653	128.2	97.089	2.4187	-0.4008	1643.615385	0.048374849	-0.040080002	20	0	14.0001	36.5058	0
924	3.7654	128.33	97.124	2.4194	-0.4005	1645.282051	0.048388699	-0.040048602	20	0	14.0005	36.5055	0
925	3.7655	128.46	97.158	2.4198	-0.4002	1646.974359	0.048396849	-0.040024802	20	0	14.0009	36.5051	0
926	3.7656	128.58	97.192	2.4205	-0.4002	1648.461538	0.048409399	-0.040016202	20	0	13.9997	36.5049	0
927	3.7657	128.69	97.228	2.421	-0.4001	1649.923077	0.048419499	-0.040013802	20	0	14.0001	36.505	0
928	3.7657	128.84	97.26	2.4214	-0.3998	1651.820513	0.048428299	-0.039982402	20	0	13.9989	36.5052	0
929	3.7658	128.97	97.294	2.4222	-0.3996	1653.512821	0.048443349	-0.039959602	20	0	13.9989	36.5056	0
930	3.7659	129.09	97.327	2.4226	-0.3995	1654.974359	0.048452799	-0.039954802	20	0	13.9989	36.5061	0
931	3.7661	129.35	97.397	2.4238	-0.3991	1658.358974	0.048476699	-0.039905202	20	0	13.9997	36.5071	0
932	3.7663	129.58	97.464	2.425	-0.3987	1661.307692	0.048499299	-0.039872802	20	0	13.9993	36.5081	0
933	3.7663	129.71	97.5	2.4255	-0.3986	1662.974359	0.048509999	-0.039863402	20	0	13.9997	36.5084	0
934	3.7664	129.84	97.533	2.426	-0.3984	1664.666667	0.048520049	-0.039838202	20	0	13.9993	36.5088	0
935	3.7665	129.96	97.567	2.4267	-0.3983	1666.128205	0.048533249	-0.039828802	20	0	13.9997	36.5091	0
936	3.7666	130.09	97.6	2.4273	-0.3982	1667.820513	0.048545199	-0.039816202	20	0	14.0001	36.5093	0
937	3.7667	130.24	97.635	2.4277	-0.398	1669.717949	0.048554649	-0.039798002	20	0	13.9997	36.5097	0
938	3.7669	130.45	97.702	2.4289	-0.3977	1672.461538	0.048577899	-0.039766602	20	0	14.0001	36.51	0
939	3.767	130.57	97.737	2.4294	-0.3975	1673.923077	0.048588599	-0.039746002	20	0	14.0005	36.51	0
940	3.767	130.71	97.772	2.43	-0.3973	1675.820513	0.048600549	-0.039732602	20	0	14.0009	36.51	0
941	3.7671	130.83	97.805	2.4306	-0.3972	1677.307692	0.048612499	-0.039718402	20	0	14.0005	36.5099	0
942	3.7672	130.94	97.84	2.4312	-0.397	1678.769231	0.048623799	-0.039698802	20	0	14.0001	36.5097	0
943	3.7673	131.08	97.872	2.4317	-0.397	1680.461538	0.048633249	-0.039696402	20	0	13.9997	36.5096	0
944	3.7674	131.22	97.907	2.4323	-0.3966	1682.358974	0.048646449	-0.039661802	20	0	14.0001	36.5094	0
945	3.7676	131.47	97.974	2.4335	-0.3962	1685.512821	0.048670349	-0.039616002	20	0	14.0005	36.5087	0
946	3.7677	131.6	98.009	2.434	-0.3959	1687.205128	0.048680399	-0.039585402	20	0	14.0005	36.5084	0
947	3.7677	131.72	98.044	2.4346	-0.396	1688.666667	0.048692949	-0.039599602	20	0	14.0009	36.508	0
948	3.7678	131.83	98.077	2.4352	-0.3959	1690.153846	0.048704899	-0.039585402	20	0	14.0009	36.5074	0
949	3.7679	131.96	98.111	2.4358	-0.3955	1691.820513	0.048716849	-0.039553802	20	0	14.0005	36.5069	0
950	3.768	132.09	98.145	2.4364	-0.3954	1693.512821	0.048727549	-0.039538002	20	0	14.0013	36.5064	0
951	3.7681	132.21	98.18	2.4369	-0.3952	1695	0.048738849	-0.039522402	20	0	14.0009	36.506	0
952	3.7682	132.34	98.214	2.4375	-0.3951	1696.666667	0.048750149	-0.039513602	20	0	14.0013	36.5055	0
953	3.7683	132.46	98.247	2.4381	-0.3949	1698.153846	0.048762749	-0.039485202	20	0	14.0009	36.5052	0
954	3.7683	132.59	98.282	2.4387	-0.3946	1699.846154	0.048774699	-0.039464802	20	0	14.0005	36.5048	0
955	3.7684	132.7	98.317	2.4393	-0.3943	1701.307692	0.048785999	-0.039434802	20	0	13.9993	36.5044	0
956	3.7686	132.95	98.384	2.4403	-0.3942	1704.461538	0.048806749	-0.039417602	20	0	13.9989	36.5046	0
957	3.7687	133.06	98.416	2.441	-0.3939	1705.948718	0.048819949	-0.039390002	20	0	13.9993	36.505	0
958	3.7688	133.19	98.452	2.4416	-0.3939	1707.615385	0.048831899	-0.039385202	20	0	13.9993	36.5055	0
959	3.7689	133.33	98.486	2.4422	-0.3936	1709.307692	0.048843849	-0.039358402	20	0	13.9989	36.5061	0
960	3.769	133.44	98.518	2.4428	-0.3935	1710.794872	0.048855149	-0.039347402	20	0	13.9989	36.5066	0
961	3.769	133.57	98.553	2.4433	-0.3933	1712.461538	0.048865849	-0.039326202	20	0	13.9997	36.507	0
962	3.7691	133.69	98.588	2.4438	-0.3931	1713.948718	0.048875899	-0.039309602	20	0	13.9997	36.5076	0
963	3.7692	133.82	98.621	2.4444	-0.393	1715.641026	0.048888499	-0.039301002	20	0	13.9997	36.5082	0
964	3.7693	133.95	98.655	2.445	-0.3926	1717.307692	0.048900449	-0.039264802	20	0	13.9993	36.5083	0
965	3.7694	134.1	98.688	2.4455	-0.3926	1719.205128	0.048910499	-0.039260002	20	0	13.9997	36.5088	0
966	3.7695	134.23	98.723	2.4462	-0.3924	1720.897436	0.048923049	-0.039244202	20	0	13.9993	36.5091	0
967	3.7696	134.34	98.757	2.4468	-0.3922	1722.358974	0.048936249	-0.039224602	20	0	13.9993	36.5098	0
968	3.7697	134.59	98.825	2.448	-0.3918	1725.538462	0.048960799	-0.039184402	20	0	13.9993	36.5102	0
969	3.7698	134.74	98.86	2.4485	-0.3917	1727.410256	0.048970849	-0.039172602	20	0	14.0005	36.5101	0
970	3.77	134.95	98.927	2.4497	-0.3914	1730.153846	0.048994749	-0.039135602	20	0	14.0005	36.5099	0
971	3.7701	135.08	98.96	2.4502	-0.3912	1731.846154	0.049004799	-0.039119802	20	0	13.9997	36.5098	0
972	3.7702	135.22	98.995	2.4509	-0.391	1733.538462	0.049017999	-0.039102402	20	0	14.0009	36.5097	0
973	3.7703	135.35	99.03	2.4515	-0.3909	1735.205128	0.049030549	-0.039092202	20	0	14.0005	36.5094	0
974	3.7704	135.56	99.097	2.4527	-0.3905	1737.948718	0.049053199	-0.039051202	20	0	14.0009	36.509	0
975	3.7705	135.71	99.133	2.4532	-0.3903	1739.846154	0.049064499	-0.039034002	20	0	14.0009	36.5088	0
976	3.7706	135.86	99.165	2.4537	-0.3902	1741.74359	0.049073949	-0.039019002	20	0	14.0009	36.5085	0
977	3.7708	136.09	99.232	2.4549	-0.3897	1744.692308	0.049098449	-0.038973202	20	0	14.0005	36.5077	0
978	3.7709	136.2	99.267	2.4555	-0.3897	1746.153846	0.049109149	-0.038966202	20	0	14.0009	36.5071	0
979	3.771	136.32	99.301	2.4561	-0.3893	1747.641026	0.049122349	-0.038932202	20	0	14.0009	36.5067	0
980	3.771	136.45	99.334	2.4567	-0.3892	1749.333333	0.049133049	-0.038918202	20	0	14.0005	36.5063	0
981	3.7711	136.59	99.368	2.4572	-0.3891	1751.205128	0.049143099	-0.038912602	20	0	14.0005	36.506	0
982	3.7713	136.82	99.436	2.4583	-0.3886	1754.153846	0.049165749	-0.038860602	20	0	14.0001	36.5054	0
983	3.7714	136.96	99.469	2.4589	-0.3885	1755.846154	0.049178949	-0.038848002	20	0	14.0013	36.505	0
984	3.7715	137.07	99.502	2.4594	-0.3883	1757.333333	0.049188999	-0.038833802	20	0	14.0005	36.5046	0
985	3.7716	137.2	99.537	2.46	-0.3883	1759	0.049199049	-0.038831402	20	0	14.0005	36.5043	0
986	3.7716	137.32	99.571	2.4607	-0.3882	1760.487179	0.049214149	-0.038822802	20	0	14.0005	36.5041	0
987	3.7717	137.45	99.603	2.4612	-0.3879	1762.179487	0.049223549	-0.038794402	20	0	14.0001	36.504	0
988	3.7718	137.58	99.638	2.4617	-0.3877	1763.846154	0.049234249	-0.038774002	20	0	13.9997	36.5041	0
989	3.7719	137.7	99.673	2.4625	-0.3876	1765.333333	0.049249349	-0.038759802	20	0	13.9997	36.5044	0
990	3.7721	137.94	99.74	2.4636	-0.3871	1768.487179	0.049272599	-0.038713402	20	0	14.0001	36.5051	0
991	3.7722	138.07	99.772	2.4642	-0.3868	1770.179487	0.049283299	-0.038683402	20	0	14.0001	36.5053	0
992	3.7723	138.2	99.808	2.4647	-0.3867	1771.846154	0.049293349	-0.038673202	20	0	14.0001	36.5057	0
993	3.7723	138.32	99.842	2.4652	-0.3867	1773.333333	0.049304649	-0.038666002	20	0	14.0005	36.5057	0
994	3.7724	138.45	99.875	2.4659	-0.3863	1775.025641	0.049317849	-0.038632202	20	0	14.0005	36.5059	0
995	3.7725	138.58	99.909	2.4665	-0.3863	1776.692308	0.049329199	-0.038629802	20	0	14.0005	36.506	0
996	3.7726	138.71	99.942	2.4671	-0.3861	1778.384615	0.049341749	-0.038605402	20	0	14.0001	36.506	0
997	3.7727	138.83	99.976	2.4676	-0.3859	1779.846154	0.049352449	-0.038588002	20	0	14.0005	36.5059	0
998	3.7728	138.96	100.011	2.4682	-0.3857	1781.538462	0.049363149	-0.038571602	20	0	14.0001	36.5058	0
999	3.7729	139.08	100.044	2.4688	-0.3855	1783.025641	0.049376349	-0.038546402	20	0	14.0005	36.5057	0
1000	3.7729	139.19	100.079	2.4694	-0.3854	1784.487179	0.049387649	-0.038535202	20	0	14.0005	36.5055	0
1001	3.773	139.32	100.113	2.47	-0.3851	1786.179487	0.049400249	-0.038514802	20	0	14.0001	36.5054	0
1002	3.7731	139.49	100.146	2.4705	-0.385	1788.282051	0.049410299	-0.038497402	20	0	13.9997	36.5053	0
1003	3.7733	139.7	100.215	2.4718	-0.3847	1791.025641	0.049435449	-0.038466802	20	0	14.0001	36.5051	0
1004	3.7734	139.85	100.248	2.4723	-0.3845	1792.923077	0.049446749	-0.038451802	20	0	14.0001	36.5049	0
1005	3.7736	140.06	100.315	2.4735	-0.3842	1795.641026	0.049469999	-0.038423402	20	0	14.0005	36.5043	0
1006	3.7736	140.21	100.35	2.4742	-0.384	1797.538462	0.049483199	-0.038403002	20	0	14.0001	36.5042	0
1007	3.7737	140.32	100.385	2.4747	-0.3837	1799.025641	0.049493299	-0.038372202	20	0	14.0009	36.5038	0
1008	3.7738	140.44	100.417	2.4753	-0.3835	1800.487179	0.049505199	-0.038354002	20	0	13.9989	36.5034	0
1009	3.7739	140.57	100.452	2.476	-0.3833	1802.179487	0.049519699	-0.038330402	20	0	14.0001	36.5034	0
1010	3.774	140.72	100.487	2.4765	-0.3834	1804.076923	0.049530349	-0.038336802	20	0	13.9989	36.5035	0
1011	3.7741	140.83	100.52	2.4771	-0.3832	1805.538462	0.049542299	-0.038317802	20	0	13.9997	36.5037	0
1012	3.7742	140.93	100.554	2.4776	-0.3829	1806.820513	0.049552999	-0.038288002	20	0	13.9997	36.5038	0
1013	3.7742	141.06	100.587	2.4782	-0.3827	1808.487179	0.049564299	-0.038269002	20	0	13.9993	36.504	0
1014	3.7743	141.21	100.621	2.4789	-0.3825	1810.384615	0.049577499	-0.038248602	20	0	14.0005	36.5042	0
1015	3.7744	141.34	100.657	2.4795	-0.3823	1812.076923	0.049589449	-0.038228002	20	0	14.0005	36.5046	0
1016	3.7745	141.47	100.688	2.4801	-0.3821	1813.769231	0.049602649	-0.038212402	20	0	14.0001	36.5047	0
1017	3.7746	141.59	100.722	2.4807	-0.382	1815.230769	0.049613349	-0.038202802	20	0	14.0001	36.5047	0
1018	3.7747	141.72	100.755	2.4812	-0.3817	1816.923077	0.049624649	-0.038173002	20	0	14.0001	36.5049	0
1019	3.7748	141.83	100.79	2.4818	-0.3816	1818.384615	0.049636599	-0.038164202	20	0	14.0001	36.5048	0
1020	3.7749	141.95	100.824	2.4824	-0.3814	1819.871795	0.049647949	-0.038136602	20	0	14.0005	36.5048	0
1021	3.7749	142.08	100.857	2.483	-0.3812	1821.564103	0.049660499	-0.038124802	20	0	14.0001	36.5047	0
1022	3.775	142.2	100.891	2.4837	-0.381	1823.025641	0.049673099	-0.038103602	20	0	13.9997	36.5046	0
1023	3.7751	142.36	100.925	2.4843	-0.3808	1825.128205	0.049685649	-0.038076002	20	0	14.0001	36.5046	0
1024	3.7753	142.57	100.992	2.4855	-0.3805	1827.871795	0.049710149	-0.038052402	20	0	14.0005	36.5045	0
1025	3.7754	142.69	101.024	2.486	-0.3803	1829.333333	0.049719599	-0.038033402	20	0	14.0013	36.5043	0
1026	3.7755	142.82	101.059	2.4866	-0.38	1831.025641	0.049731549	-0.038003602	20	0	14.0009	36.504	0
1027	3.7756	142.95	101.094	2.4872	-0.3798	1832.717949	0.049744749	-0.037983002	20	0	14.0009	36.5034	0
1028	3.7756	143.08	101.126	2.4878	-0.3797	1834.410256	0.049755449	-0.037967402	20	0	14.0001	36.5028	0
1029	3.7757	143.2	101.16	2.4884	-0.3797	1835.871795	0.049768649	-0.037968802	20	0	13.9997	36.5026	0
1030	3.7758	143.35	101.196	2.489	-0.3793	1837.769231	0.049779349	-0.037934202	20	0	13.9993	36.5027	0
1031	3.7759	143.46	101.227	2.4896	-0.3793	1839.230769	0.049791899	-0.037928802	20	0	13.9989	36.503	0
1032	3.776	143.59	101.262	2.4902	-0.3789	1840.923077	0.049804499	-0.037890202	20	0	13.9989	36.5035	0
1033	3.7762	143.82	101.329	2.4914	-0.3788	1843.871795	0.049828349	-0.037883002	20	0	13.9997	36.5047	0
1034	3.7762	143.97	101.363	2.492	-0.3786	1845.769231	0.049840299	-0.037858602	20	0	13.9997	36.5051	0
1035	3.7763	144.08	101.396	2.4926	-0.3782	1847.230769	0.049852249	-0.037816002	20	0	13.9993	36.5055	0
1036	3.7764	144.22	101.43	2.4932	-0.3782	1848.923077	0.049864199	-0.037819202	20	0	13.9993	36.5058	0
1037	3.7765	144.33	101.465	2.4938	-0.3779	1850.410256	0.049875499	-0.037787802	20	0	13.9993	36.506	0
1038	3.7767	144.58	101.532	2.495	-0.3776	1853.564103	0.049899399	-0.037759402	20	0	14.0001	36.5067	0
1039	3.7768	144.69	101.566	2.4956	-0.3775	1855.025641	0.049912599	-0.037750602	20	0	14.0001	36.5068	0
1040	3.7769	144.82	101.599	2.4962	-0.3773	1856.717949	0.049923299	-0.037730202	20	0	14.0001	36.507	0
1041	3.7769	144.97	101.633	2.4968	-0.3772	1858.615385	0.049935249	-0.037718402	20	0	14.0001	36.507	0
1042	3.7771	145.2	101.7	2.498	-0.3766	1861.564103	0.049960999	-0.037660002	20	0	14.0001	36.5073	0
1043	3.7772	145.35	101.735	2.4986	-0.3765	1863.461538	0.049971099	-0.037646002	20	0	14.0001	36.5078	0
1044	3.7774	145.58	101.802	2.4997	-0.3763	1866.410256	0.049994949	-0.037627002	20	0	14.0009	36.5075	0
1045	3.7775	145.73	101.837	2.5005	-0.376	1868.307692	0.050010049	-0.037599402	20	0	14.0001	36.5073	0
1046	3.7776	145.96	101.904	2.5017	-0.3758	1871.25641	0.050033949	-0.037577402	20	0	14.0005	36.5066	0
1047	3.7777	146.07	101.936	2.5021	-0.3756	1872.717949	0.050042749	-0.037560002	20	0	14.0005	36.5062	0
1048	3.7778	146.2	101.97	2.5028	-0.3753	1874.410256	0.050056599	-0.037527002	20	0	14.0009	36.5058	0
1049	3.7779	146.34	102.005	2.5034	-0.3751	1876.102564	0.050067249	-0.037506402	20	0	14.0009	36.5054	0
1050	3.778	146.45	102.039	2.504	-0.3749	1877.564103	0.050080449	-0.037490802	20	0	14.0005	36.5048	0
1051	3.7781	146.58	102.073	2.5047	-0.3749	1879.25641	0.050094299	-0.037490002	20	0	14.0013	36.5043	0
1052	3.7782	146.71	102.108	2.5052	-0.3747	1880.948718	0.050103099	-0.037467202	20	0	14.0013	36.5038	0
1053	3.7783	146.96	102.175	2.5064	-0.3742	1884.102564	0.050128899	-0.037416602	20	0	14.0013	36.5026	0
1054	3.7784	147.07	102.207	2.507	-0.3741	1885.564103	0.050140799	-0.037405602	20	0	14.0001	36.5021	0
1055	3.7785	147.21	102.241	2.5077	-0.3738	1887.25641	0.050154049	-0.037380402	20	0	14.0001	36.5022	0
1056	3.7786	147.34	102.275	2.5083	-0.3736	1888.948718	0.050165349	-0.037360002	20	0	13.9993	36.5023	0
1057	3.7787	147.47	102.308	2.5089	-0.3733	1890.615385	0.050177899	-0.037326802	20	0	13.9997	36.5029	0
1058	3.7788	147.58	102.343	2.5094	-0.3732	1892.102564	0.050187949	-0.037324602	20	0	14.0001	36.5033	0
1059	3.7788	147.72	102.377	2.51	-0.373	1893.794872	0.050200549	-0.037300802	20	0	13.9993	36.5038	0
1060	3.779	147.98	102.444	2.5113	-0.3728	1897.153846	0.050225049	-0.037276402	20	0	13.9997	36.5044	0
1061	3.7791	148.09	102.477	2.5118	-0.3726	1898.615385	0.050236399	-0.037264602	20	0	14.0001	36.5047	0
1062	3.7792	148.22	102.511	2.5125	-0.3723	1900.307692	0.050249599	-0.037225202	20	0	14.0005	36.5049	0
1063	3.7793	148.34	102.545	2.5131	-0.3723	1901.794872	0.050262149	-0.037228402	20	0	14.0001	36.505	0
1064	3.7794	148.47	102.577	2.5136	-0.372	1903.461538	0.050271599	-0.037196202	20	0	13.9997	36.505	0
1065	3.7795	148.72	102.646	2.5149	-0.3716	1906.641026	0.050297999	-0.037160602	20	0	14.0001	36.5051	0
1066	3.7797	148.95	102.712	2.5161	-0.3713	1909.564103	0.050321249	-0.037126002	20	0	14.0005	36.5051	0
1067	3.7798	149.09	102.747	2.5165	-0.371	1911.461538	0.050330049	-0.037098402	20	0	13.9997	36.505	0
1068	3.7799	149.23	102.779	2.5173	-0.3709	1913.153846	0.050345749	-0.037092202	20	0	14.0005	36.5048	0
1069	3.78	149.34	102.813	2.5179	-0.3708	1914.641026	0.050357699	-0.037080402	20	0	14.0005	36.5047	0
1070	3.7801	149.47	102.846	2.5185	-0.3705	1916.307692	0.050369049	-0.037045602	20	0	14.0009	36.5045	0
1071	3.7802	149.59	102.881	2.5191	-0.3702	1917.794872	0.050381599	-0.037020402	20	0	14.0009	36.5043	0
1072	3.7803	149.83	102.948	2.5203	-0.37	1920.948718	0.050405499	-0.036999202	20	0	14.0001	36.5038	0
1073	3.7804	149.97	102.982	2.5209	-0.3698	1922.641026	0.050417449	-0.036979402	20	0	14.0005	36.5036	0
1074	3.7805	150.08	103.014	2.5214	-0.3696	1924.102564	0.050428749	-0.036959002	20	0	14.0009	36.503	0
1075	3.7806	150.21	103.049	2.522	-0.3695	1925.794872	0.050440699	-0.036948802	20	0	14.0005	36.5025	0
1076	3.7807	150.33	103.083	2.5228	-0.3692	1927.25641	0.050456399	-0.036918002	20	0	14.0005	36.5021	0
1077	3.7808	150.44	103.115	2.5232	-0.3691	1928.74359	0.050464599	-0.036911802	20	0	14.0009	36.5018	0
1078	3.7808	150.57	103.15	2.5239	-0.3689	1930.435897	0.050477799	-0.036892002	20	0	14.0001	36.5015	0
1079	3.7809	150.7	103.183	2.5246	-0.3687	1932.102564	0.050491649	-0.036874802	20	0	13.9997	36.5014	0
1080	3.781	150.82	103.216	2.5251	-0.3686	1933.589744	0.050501699	-0.036857402	20	0	13.9993	36.5015	0
1081	3.7811	150.97	103.251	2.5258	-0.3683	1935.487179	0.050516799	-0.036830602	20	0	13.9997	36.5016	0
1082	3.7813	151.2	103.317	2.5269	-0.3679	1938.435897	0.050538799	-0.036788802	20	0	13.9997	36.502	0
1083	3.7814	151.35	103.352	2.5275	-0.3678	1940.333333	0.050550099	-0.036778602	20	0	14.0001	36.5022	0
1084	3.7815	151.48	103.384	2.5281	-0.3674	1942	0.050562649	-0.036744802	20	0	14.0001	36.5024	0
1085	3.7815	151.59	103.418	2.5288	-0.3673	1943.487179	0.050576499	-0.036733802	20	0	14.0005	36.5025	0
1086	3.7816	151.71	103.451	2.5294	-0.367	1944.948718	0.050587799	-0.036701402	20	0	13.9997	36.5028	0
1087	3.7817	151.87	103.486	2.53	-0.367	1947.051282	0.050600999	-0.036698202	20	0	14.0009	36.5028	0
1088	3.7819	152.08	103.551	2.5311	-0.3667	1949.794872	0.050621749	-0.036669202	20	0	14.0005	36.5025	0
1089	3.782	152.23	103.586	2.5319	-0.3665	1951.692308	0.050637499	-0.036651002	20	0	13.9997	36.5024	0
1090	3.7821	152.35	103.619	2.5325	-0.3662	1953.179487	0.050649449	-0.036621002	20	0	14.0001	36.5023	0
1091	3.7821	152.46	103.652	2.533	-0.3661	1954.641026	0.050660749	-0.036612402	20	0	14.0005	36.5021	0
1092	3.7822	152.59	103.686	2.5336	-0.3658	1956.333333	0.050672049	-0.036584002	20	0	14.0005	36.502	0
1093	3.7824	152.82	103.753	2.5349	-0.3654	1959.282051	0.050697199	-0.036537602	20	0	14.0001	36.5015	0
1094	3.7825	152.95	103.788	2.5353	-0.3652	1960.948718	0.050706649	-0.036517802	20	0	14.0001	36.5013	0
1095	3.7826	153.09	103.819	2.5361	-0.365	1962.641026	0.050721749	-0.036503002	20	0	13.9997	36.501	0
1096	3.7828	153.33	103.888	2.5373	-0.3648	1965.794872	0.050746249	-0.036477002	20	0	14.0001	36.5008	0
1097	3.7828	153.45	103.921	2.5379	-0.3646	1967.282051	0.050758799	-0.036458002	20	0	14.0001	36.5009	0
1098	3.7829	153.58	103.955	2.5385	-0.3643	1968.948718	0.050770149	-0.036432002	20	0	13.9997	36.501	0
1099	3.7831	153.83	104.022	2.5397	-0.3639	1972.128205	0.050794649	-0.036393402	20	0	14.0005	36.5019	0
1100	3.7832	153.96	104.056	2.5404	-0.3639	1973.794872	0.050807249	-0.036390202	20	0	14.0001	36.5019	0
1101	3.7833	154.09	104.088	2.541	-0.3637	1975.487179	0.050820449	-0.036365002	20	0	14.0001	36.5018	0
1102	3.7834	154.2	104.122	2.5416	-0.3635	1976.974359	0.050831099	-0.036353202	20	0	13.9997	36.5019	0
1103	3.7835	154.35	104.157	2.5422	-0.3631	1978.846154	0.050843699	-0.036313802	20	0	14.0005	36.5021	0
1104	3.7836	154.58	104.224	2.5434	-0.3628	1981.794872	0.050868199	-0.036280802	20	0	14.0005	36.502	0
1105	3.7837	154.7	104.258	2.544	-0.3627	1983.282051	0.050880799	-0.036269002	20	0	13.9997	36.502	0
1106	3.7838	154.84	104.29	2.5446	-0.3625	1985.179487	0.050892749	-0.036246202	20	0	14.0001	36.502	0
1107	3.7839	154.96	104.325	2.5453	-0.3622	1986.641026	0.050905949	-0.036217002	20	0	14.0009	36.5018	0
1108	3.784	155.07	104.357	2.5459	-0.3621	1988.128205	0.050917899	-0.036214602	20	0	14.0001	36.5016	0
1109	3.7841	155.21	104.391	2.5465	-0.3619	1989.820513	0.050929199	-0.036191002	20	0	14.0005	36.5014	0
1110	3.7841	155.34	104.426	2.5471	-0.3617	1991.487179	0.050941149	-0.036174402	20	0	14.0009	36.5013	0
1111	3.7842	155.45	104.458	2.5477	-0.3615	1992.974359	0.050953699	-0.036154002	20	0	14.0009	36.501	0
1112	3.7843	155.57	104.492	2.5483	-0.3613	1994.435897	0.050965649	-0.036128002	20	0	14.0009	36.5008	0
1113	3.7844	155.71	104.526	2.5489	-0.3612	1996.333333	0.050977599	-0.036117802	20	0	14.0009	36.5004	0
1114	3.7845	155.85	104.559	2.5495	-0.361	1998.025641	0.050990799	-0.036100402	20	0	14.0005	36.5001	0
1115	3.7846	155.98	104.594	2.5503	-0.3608	1999.717949	0.051005899	-0.036079802	20	0	13.9997	36.5001	0
1116	3.7848	156.22	104.661	2.5514	-0.3603	2002.871795	0.051028549	-0.036025602	20	0	13.9997	36.5005	0
1117	3.7849	156.44	104.728	2.5526	-0.3602	2005.615385	0.051052399	-0.036016802	20	0	14.0005	36.5013	0
1118	3.785	156.57	104.763	2.5532	-0.3599	2007.282051	0.051064999	-0.035986202	20	0	13.9997	36.5016	0
1119	3.7851	156.72	104.797	2.5539	-0.3596	2009.179487	0.051077549	-0.035964802	20	0	14.0001	36.502	0
1120	3.7852	156.83	104.829	2.5545	-0.3596	2010.666667	0.051090149	-0.035956202	20	0	13.9989	36.5023	0
1121	3.7853	156.96	104.864	2.5551	-0.3592	2012.333333	0.051101449	-0.035924002	20	0	13.9997	36.5027	0
1122	3.7854	157.08	104.896	2.5558	-0.3592	2013.820513	0.051115299	-0.035917602	20	0	13.9989	36.5031	0
1123	3.7854	157.23	104.93	2.5563	-0.3589	2015.717949	0.051125349	-0.035890802	20	0	13.9993	36.5032	0
1124	3.7856	157.46	104.996	2.5575	-0.3586	2018.666667	0.051149849	-0.035861002	20	0	13.9997	36.5039	0
1125	3.7857	157.59	105.031	2.5581	-0.3583	2020.333333	0.051161199	-0.035828602	20	0	13.9997	36.5039	0
1126	3.7858	157.7	105.063	2.5588	-0.3582	2021.820513	0.051175649	-0.035823002	20	0	14.0001	36.5039	0
1127	3.7859	157.85	105.097	2.5594	-0.3579	2023.717949	0.051187599	-0.035788402	20	0	14.0005	36.5038	0
1128	3.7861	158.08	105.164	2.5606	-0.3574	2026.666667	0.051211499	-0.035744402	20	0	14.0005	36.5038	0
1129	3.7861	158.21	105.199	2.5612	-0.3574	2028.358974	0.051224699	-0.035744402	20	0	14.0001	36.5035	0
1130	3.7862	158.34	105.233	2.5619	-0.3571	2030.025641	0.051237899	-0.035712802	20	0	14.0005	36.5034	0
1131	3.7863	158.47	105.265	2.5624	-0.3571	2031.717949	0.051248549	-0.035706602	20	0	14.0005	36.503	0
1132	3.7864	158.59	105.3	2.5631	-0.3569	2033.179487	0.051261749	-0.035688402	20	0	14.0005	36.5028	0
1133	3.7865	158.72	105.334	2.5638	-0.3567	2034.871795	0.051276249	-0.035666402	20	0	14.0005	36.5023	0
1134	3.7867	158.92	105.4	2.565	-0.3563	2037.410256	0.051299499	-0.035634802	20	0	14.0005	36.5015	0
1135	3.7867	159.1	105.433	2.5655	-0.356	2039.717949	0.051310199	-0.035604202	20	0	14.0009	36.5011	0
1136	3.7869	159.34	105.502	2.5668	-0.3557	2042.871795	0.051336599	-0.035569402	20	0	14.0013	36.5	0
1137	3.787	159.48	105.534	2.5674	-0.3555	2044.564103	0.051347249	-0.035550602	20	0	13.9997	36.4995	0
1138	3.7872	159.72	105.603	2.5687	-0.3551	2047.717949	0.051374949	-0.035508002	20	0	13.9997	36.4995	0
1139	3.7873	159.84	105.636	2.5693	-0.355	2049.205128	0.051385599	-0.035496202	20	0	13.9993	36.4998	0
1140	3.7874	159.95	105.67	2.5699	-0.3548	2050.666667	0.051398199	-0.035482802	20	0	13.9997	36.5002	0
1141	3.7874	160.07	105.701	2.5704	-0.3547	2052.153846	0.051408249	-0.035471002	20	0	13.9989	36.5004	0
1142	3.7875	160.2	105.736	2.5711	-0.3544	2053.820513	0.051421449	-0.035439402	20	0	13.9997	36.5008	0
1143	3.7876	160.35	105.77	2.5718	-0.3542	2055.717949	0.051435299	-0.035418202	20	0	13.9993	36.5012	0
1144	3.7877	160.46	105.802	2.5724	-0.3542	2057.205128	0.051447249	-0.035418202	20	0	13.9989	36.5016	0
1145	3.7878	160.58	105.837	2.5731	-0.3536	2058.666667	0.051461699	-0.035364602	20	0	13.9993	36.5019	0
1146	3.7879	160.71	105.872	2.5735	-0.3535	2060.358974	0.051470499	-0.035345802	20	0	13.9997	36.5024	0
1147	3.788	160.86	105.903	2.5742	-0.3535	2062.25641	0.051483699	-0.035348002	20	0	13.9993	36.5029	0
1148	3.7881	161.09	105.969	2.5755	-0.3529	2065.205128	0.051510099	-0.035294602	20	0	13.9997	36.5034	0
1149	3.7882	161.2	106.003	2.5761	-0.3528	2066.666667	0.051522049	-0.035281202	20	0	13.9997	36.5041	0
1150	3.7883	161.33	106.037	2.5767	-0.3525	2068.358974	0.051533999	-0.035254402	20	0	14.0001	36.504	0
1151	3.7884	161.46	106.069	2.5773	-0.3526	2070.051282	0.051545949	-0.035258202	20	0	14.0009	36.5038	0
1152	3.7885	161.59	106.103	2.578	-0.3522	2071.717949	0.051559749	-0.035222802	20	0	14.0005	36.5036	0
1153	3.7886	161.69	106.134	2.5785	-0.352	2073	0.051570449	-0.035199202	20	0	14.0009	36.5032	0
1154	3.7887	161.81	106.17	2.5791	-0.3519	2074.461538	0.051581749	-0.035191402	20	0	14.0009	36.5028	0
1155	3.7887	161.96	106.204	2.5798	-0.3518	2076.358974	0.051595599	-0.035179602	20	0	14.0013	36.5024	0
1156	3.7888	162.1	106.236	2.5805	-0.3515	2078.25641	0.051610049	-0.035147202	20	0	14.0017	36.502	0
1157	3.789	162.33	106.306	2.5817	-0.3512	2081.205128	0.051634599	-0.035116402	20	0	14.0005	36.5012	0
1158	3.7891	162.45	106.338	2.5824	-0.351	2082.666667	0.051647799	-0.035096002	20	0	14.0013	36.501	0
1159	3.7892	162.58	106.372	2.5831	-0.3508	2084.358974	0.051661599	-0.035075602	20	0	14.0013	36.5007	0
1160	3.7893	162.71	106.405	2.5836	-0.3506	2086.051282	0.051671049	-0.035059802	20	0	14.0005	36.5002	0
1161	3.7894	162.83	106.439	2.5841	-0.3504	2087.512821	0.051682999	-0.035043202	20	0	14.0009	36.4998	0
1162	3.7894	162.94	106.473	2.5849	-0.3501	2089	0.051697449	-0.035013202	20	0	14.0001	36.4994	0
1163	3.7895	163.07	106.506	2.5855	-0.3497	2090.666667	0.051709399	-0.034970802	20	0	14.0005	36.4991	0
1164	3.7896	163.2	106.54	2.5862	-0.3497	2092.358974	0.051723849	-0.034974602	20	0	14.0001	36.499	0
1165	3.7897	163.32	106.574	2.5867	-0.3495	2093.846154	0.051734549	-0.034946402	20	0	13.9993	36.499	0
1166	3.7898	163.43	106.607	2.5873	-0.3495	2095.307692	0.051746499	-0.034947202	20	0	13.9993	36.499	0
1167	3.7899	163.58	106.64	2.588	-0.3491	2097.205128	0.051759049	-0.034913202	20	0	13.9997	36.4991	0
1168	3.79	163.7	106.672	2.5885	-0.3488	2098.692308	0.051769749	-0.034877802	20	0	13.9993	36.4994	0
1169	3.79	163.84	106.707	2.5892	-0.3488	2100.564103	0.051784199	-0.034877002	20	0	13.9993	36.4997	0
1170	3.7901	163.96	106.741	2.5899	-0.3486	2102.051282	0.051798049	-0.034856602	20	0	14.0001	36.4997	0
1171	3.7902	164.09	106.775	2.5907	-0.3483	2103.74359	0.051813149	-0.034832202	20	0	14.0001	36.4999	0
1172	3.7903	164.21	106.807	2.5911	-0.3482	2105.205128	0.051822549	-0.034820402	20	0	14.0005	36.4999	0
1173	3.7904	164.35	106.841	2.5918	-0.348	2107.102564	0.051836399	-0.034802202	20	0	14.0001	36.4999	0
1174	3.7906	164.58	106.908	2.5931	-0.3475	2110.051282	0.051862149	-0.034748602	20	0	14.0001	36.4999	0
1175	3.7907	164.72	106.942	2.5938	-0.3472	2111.74359	0.051875349	-0.034722602	20	0	14.0005	36.5	0
1176	3.7907	164.83	106.975	2.5943	-0.3472	2113.205128	0.051886049	-0.034717202	20	0	14.0001	36.5	0
1177	3.7908	164.95	107.009	2.595	-0.347	2114.692308	0.051899899	-0.034701402	20	0	14.0005	36.4999	0
1178	3.7909	165.08	107.042	2.5957	-0.3466	2116.358974	0.051914349	-0.034662802	20	0	14.0009	36.4998	0
1179	3.791	165.21	107.076	2.5965	-0.3466	2118.051282	0.051929449	-0.034658002	20	0	14.0001	36.4997	0
1180	3.7911	165.34	107.11	2.597	-0.3464	2119.74359	0.051940099	-0.034643002	20	0	14.0001	36.4995	0
1181	3.7913	165.59	107.177	2.5983	-0.3461	2122.897436	0.051965899	-0.034606002	20	0	14.0005	36.4992	0
1182	3.7913	165.72	107.211	2.599	-0.3456	2124.589744	0.051979099	-0.034562002	20	0	14.0009	36.499	0
1183	3.7915	165.96	107.277	2.6002	-0.3455	2127.74359	0.052004249	-0.034553202	20	0	14.0001	36.4986	0
1184	3.7916	166.1	107.309	2.6008	-0.3454	2129.435897	0.052015549	-0.034540602	20	0	14.0001	36.4985	0
1185	3.7917	166.21	107.343	2.6015	-0.3451	2130.897436	0.052029999	-0.034512202	20	0	13.9997	36.4984	0
1186	3.7918	166.34	107.377	2.6021	-0.345	2132.589744	0.052042599	-0.034502002	20	0	13.9997	36.4984	0
1187	3.7919	166.46	107.409	2.6027	-0.3447	2134.051282	0.052053299	-0.034473002	20	0	14.0001	36.4984	0
1188	3.792	166.57	107.443	2.6034	-0.3446	2135.538462	0.052067099	-0.034460402	20	0	13.9993	36.4985	0
1189	3.792	166.72	107.478	2.604	-0.3443	2137.435897	0.052080299	-0.034428002	20	0	14.0001	36.4985	0
1190	3.7921	166.85	107.51	2.6046	-0.3442	2139.102564	0.052091649	-0.034423202	20	0	13.9997	36.4986	0
1191	3.7922	166.95	107.543	2.6054	-0.344	2140.384615	0.052107349	-0.034397202	20	0	13.9997	36.4987	0
1192	3.7923	167.06	107.576	2.6059	-0.3437	2141.846154	0.052118649	-0.034366602	20	0	14.0001	36.4989	0
1193	3.7924	167.21	107.611	2.6066	-0.3436	2143.74359	0.052132499	-0.034360202	20	0	14.0005	36.4989	0
1194	3.7925	167.33	107.644	2.6073	-0.3434	2145.230769	0.052146349	-0.034343802	20	0	13.9997	36.4992	0
1195	3.7926	167.44	107.676	2.6079	-0.3433	2146.692308	0.052158299	-0.034328002	20	0	13.9997	36.4994	0
1196	3.7927	167.59	107.711	2.6087	-0.3431	2148.589744	0.052173349	-0.034308202	20	0	14.0001	36.4994	0
1197	3.7927	167.72	107.746	2.6093	-0.3428	2150.282051	0.052185949	-0.034281402	20	0	13.9997	36.4996	0
1198	3.7928	167.84	107.778	2.6099	-0.3426	2151.74359	0.052197249	-0.034260202	20	0	14.0001	36.4996	0
1199	3.7929	167.98	107.812	2.6106	-0.3424	2153.641026	0.052212349	-0.034243602	20	0	14.0001	36.4998	0
1200	3.7931	168.2	107.879	2.6118	-0.3421	2156.384615	0.052236849	-0.034209802	20	0	14.0009	36.4998	0
1201	3.7932	168.35	107.914	2.6126	-0.3419	2158.282051	0.052251299	-0.034190802	20	0	14.0001	36.4998	0
1202	3.7933	168.58	107.98	2.6139	-0.3414	2161.230769	0.052278349	-0.034144402	20	0	13.9997	36.4997	0
1203	3.7934	168.69	108.015	2.6145	-0.3413	2162.692308	0.052290299	-0.034125602	20	0	14.0005	36.4997	0
1204	3.7935	168.82	108.047	2.6152	-0.3411	2164.384615	0.052303499	-0.034113002	20	0	14.0005	36.4995	0
1205	3.7936	168.99	108.081	2.6158	-0.341	2166.487179	0.052316699	-0.034098802	20	0	14.0005	36.4992	0
1206	3.7938	169.22	108.148	2.6172	-0.3406	2169.435897	0.052344349	-0.034057002	20	0	14.0009	36.4985	0
1207	3.7939	169.35	108.182	2.6179	-0.3404	2171.128205	0.052357549	-0.034039602	20	0	14.0005	36.498	0
1208	3.794	169.56	108.248	2.6191	-0.3399	2173.871795	0.052382099	-0.033990002	20	0	13.9997	36.4977	0
1209	3.7941	169.71	108.282	2.6198	-0.3398	2175.74359	0.052395299	-0.033976602	20	0	13.9993	36.4977	0
1210	3.7942	169.82	108.314	2.6204	-0.3396	2177.230769	0.052408499	-0.033957002	20	0	13.9993	36.4979	0
1211	3.7943	169.96	108.349	2.6211	-0.3393	2178.923077	0.052421699	-0.033928602	20	0	13.9993	36.4981	0
1212	3.7944	170.09	108.38	2.6217	-0.3391	2180.589744	0.052434249	-0.033912002	20	0	13.9997	36.4983	0
1213	3.7945	170.2	108.414	2.6224	-0.339	2182.076923	0.052448749	-0.033902602	20	0	13.9993	36.4988	0
1214	3.7946	170.35	108.448	2.623	-0.3389	2183.974359	0.052460649	-0.033886802	20	0	13.9989	36.4992	0
1215	3.7946	170.48	108.481	2.6237	-0.3386	2185.641026	0.052474499	-0.033864002	20	0	13.9997	36.4995	0
1216	3.7947	170.58	108.515	2.6244	-0.3384	2186.923077	0.052487699	-0.033836402	20	0	13.9993	36.4998	0
1217	3.7949	170.83	108.582	2.6257	-0.3381	2190.076923	0.052513499	-0.033808002	20	0	13.9997	36.5005	0
1218	3.795	170.97	108.617	2.6264	-0.3379	2191.974359	0.052528549	-0.033786002	20	0	14.0001	36.5008	0
1219	3.7951	171.09	108.648	2.627	-0.3375	2193.435897	0.052540499	-0.033750602	20	0	14.0009	36.5008	0
1220	3.7952	171.2	108.683	2.6277	-0.3374	2194.923077	0.052553699	-0.033735602	20	0	14.0001	36.5008	0
1221	3.7953	171.32	108.717	2.6284	-0.3372	2196.384615	0.052568799	-0.033720602	20	0	13.9997	36.5008	0
1222	3.7953	171.45	108.749	2.6289	-0.337	2198.076923	0.052577599	-0.033703202	20	0	14.0001	36.5007	0
1223	3.7954	171.58	108.784	2.6297	-0.3366	2199.769231	0.052593349	-0.033660002	20	0	14.0005	36.5007	0
1224	3.7955	171.7	108.818	2.6303	-0.3366	2201.230769	0.052605899	-0.033660802	20	0	14.0001	36.5006	0
1225	3.7956	171.83	108.85	2.631	-0.3364	2202.923077	0.052619099	-0.033642602	20	0	14.0001	36.5005	0
1226	3.7957	171.96	108.885	2.6316	-0.3361	2204.615385	0.052632299	-0.033614202	20	0	14.0001	36.5003	0
1227	3.7959	172.19	108.951	2.633	-0.3355	2207.564103	0.052659949	-0.033552002	20	0	14.0005	36.4999	0
1228	3.796	172.32	108.985	2.6336	-0.3357	2209.230769	0.052671299	-0.033565402	20	0	14.0001	36.4995	0
1229	3.796	172.47	109.018	2.6343	-0.3355	2211.128205	0.052685099	-0.033554402	20	0	14.0009	36.4991	0
1230	3.7961	172.58	109.052	2.635	-0.3351	2212.615385	0.052699549	-0.033513402	20	0	14.0009	36.4988	0
1231	3.7963	172.83	109.119	2.6362	-0.3346	2215.769231	0.052724099	-0.033462202	20	0	14.0005	36.4978	0
1232	3.7964	172.96	109.153	2.6368	-0.3348	2217.461538	0.052736049	-0.033482802	20	0	14.0009	36.4974	0
1233	3.7965	173.09	109.185	2.6376	-0.3344	2219.128205	0.052751149	-0.033438602	20	0	14.0005	36.4971	0
1234	3.7966	173.21	109.219	2.6382	-0.3341	2220.615385	0.052764349	-0.033412602	20	0	13.9997	36.4971	0
1235	3.7966	173.34	109.253	2.6389	-0.3338	2222.282051	0.052777549	-0.033378802	20	0	13.9997	36.4973	0
1236	3.7967	173.45	109.285	2.6396	-0.3339	2223.769231	0.052791349	-0.033387402	20	0	13.9993	36.4976	0
1237	3.7968	173.59	109.319	2.6403	-0.3336	2225.461538	0.052805199	-0.033363002	20	0	13.9997	36.4979	0
1238	3.7969	173.72	109.353	2.6408	-0.3333	2227.128205	0.052816499	-0.033328402	20	0	14.0001	36.4984	0
1239	3.797	173.85	109.385	2.6414	-0.3334	2228.820513	0.052828449	-0.033338602	20	0	13.9997	36.499	0
1240	3.7972	174.08	109.452	2.6428	-0.3329	2231.769231	0.052856749	-0.033292802	20	0	13.9989	36.4996	0
1241	3.7973	174.23	109.486	2.6435	-0.3324	2233.666667	0.052869299	-0.033240002	20	0	13.9993	36.5001	0
1242	3.7974	174.44	109.553	2.6449	-0.3322	2236.410256	0.052898849	-0.033216402	20	0	14.0001	36.501	0
1243	3.7975	174.59	109.588	2.6455	-0.332	2238.307692	0.052910799	-0.033204602	20	0	14.0005	36.5012	0
1244	3.7976	174.7	109.623	2.6462	-0.3318	2239.769231	0.052923999	-0.033182602	20	0	14.0005	36.5012	0
1245	3.7977	174.85	109.655	2.6469	-0.3314	2241.666667	0.052938499	-0.033142402	20	0	14.0001	36.5012	0
1246	3.798	174.98	109.727	2.6486	-0.3311	2243.358974	0.052971799	-0.033113202	20	0	14.0001	36.5009	0
1247	3.7984	175.16	109.79	2.65	-0.3308	2245.666667	0.052999449	-0.033077802	20	0	14.0001	36.5008	0
1248	3.7986	175.29	109.845	2.6511	-0.3301	2247.358974	0.053022099	-0.033008602	20	0	14.0005	36.5002	0
1249	3.7988	175.44	109.887	2.652	-0.33	2249.25641	0.053040299	-0.033002202	20	0	14.0001	36.4995	0
1250	3.799	175.64	109.936	2.6529	-0.3296	2251.769231	0.053058549	-0.032958002	20	0	14.0001	36.4987	0
1251	3.7992	175.85	109.988	2.654	-0.3293	2254.512821	0.053079949	-0.032930602	20	0	14.0005	36.498	0
1252	3.7993	176.08	110.047	2.6552	-0.3291	2257.461538	0.053103799	-0.032907602	20	0	14.0013	36.497	0
1253	3.7995	176.31	110.11	2.6563	-0.3287	2260.410256	0.053126449	-0.032865202	20	0	14.0001	36.4966	0
1254	3.7996	176.44	110.145	2.6571	-0.3284	2262.102564	0.053142149	-0.032843002	20	0	14.0001	36.4966	0
1255	3.7997	176.61	110.18	2.6577	-0.3283	2264.205128	0.053154749	-0.032832802	20	0	14.0001	36.4967	0
1256	3.7998	176.74	110.216	2.6584	-0.328	2265.897436	0.053167949	-0.032804402	20	0	14.0001	36.497	0
1257	3.7999	176.94	110.255	2.6591	-0.3279	2268.410256	0.053182399	-0.032788802	20	0	13.9997	36.4974	0
1258	3.7999	177.08	110.293	2.6599	-0.3276	2270.307692	0.053198099	-0.032762002	20	0	13.9997	36.4975	0
1259	3.8	177.25	110.335	2.6607	-0.3274	2272.410256	0.053213199	-0.032744602	20	0	14.0005	36.4978	0
1260	3.8001	177.45	110.378	2.6615	-0.3273	2274.948718	0.053229549	-0.032734402	20	0	13.9997	36.4982	0
1261	3.8002	177.59	110.42	2.6623	-0.3269	2276.846154	0.053245249	-0.032686402	20	0	14.0001	36.4985	0
1262	3.8003	177.81	110.466	2.6631	-0.3267	2279.564103	0.053262899	-0.032667402	20	0	14.0001	36.4985	0
1263	3.8004	178	110.51	2.664	-0.3267	2282.102564	0.053280499	-0.032665802	20	0	14.0005	36.4986	0
1264	3.8005	178.2	110.559	2.6649	-0.326	2284.615385	0.053297449	-0.032604402	20	0	14.0001	36.4989	0
1265	3.8006	178.41	110.609	2.6658	-0.326	2287.358974	0.053316299	-0.032600402	20	0	14.0005	36.499	0
1266	3.8006	178.61	110.658	2.6667	-0.3258	2289.897436	0.053333899	-0.032578402	20	0	14.0005	36.4987	0
1267	3.8007	178.86	110.71	2.6677	-0.3254	2293.051282	0.053354649	-0.032539002	20	0	14.0005	36.4985	0
1268	3.8008	179.06	110.766	2.6687	-0.3253	2295.589744	0.053373549	-0.032530402	20	0	14.0001	36.4983	0
1269	3.8009	179.3	110.818	2.6697	-0.3249	2298.74359	0.053393649	-0.032485402	20	0	13.9997	36.4981	0
1270	3.801	179.53	110.875	2.6708	-0.3245	2301.692308	0.053416899	-0.032449202	20	0	14.0013	36.4978	0
1271	3.8011	179.78	110.935	2.6719	-0.3243	2304.846154	0.053438899	-0.032429602	20	0	14.0009	36.4973	0
1272	3.8012	180.04	110.993	2.6731	-0.324	2308.205128	0.053462149	-0.032396402	20	0	14.0005	36.4969	0
1273	3.8012	180.29	111.054	2.6742	-0.3236	2311.384615	0.053484799	-0.032362602	20	0	14.0001	36.4963	0
1274	3.8013	180.55	111.115	2.6754	-0.3232	2314.74359	0.053507449	-0.032324002	20	0	14.0005	36.4959	0
1275	3.8014	180.83	111.181	2.6764	-0.323	2318.333333	0.053528799	-0.032295602	20	0	13.9997	36.4958	0
1276	3.8015	181.11	111.248	2.6779	-0.3226	2321.897436	0.053558349	-0.032257002	20	0	13.9993	36.4959	0
1277	3.8016	181.39	111.313	2.679	-0.3223	2325.487179	0.053580999	-0.032229402	20	0	13.9993	36.4962	0
1278	3.8017	181.65	111.383	2.6804	-0.3219	2328.846154	0.053608049	-0.032186202	20	0	14.0001	36.4966	0
1279	3.8018	181.98	111.455	2.6818	-0.3215	2333.051282	0.053635699	-0.032148202	20	0	13.9997	36.4969	0
1280	3.8019	182.27	111.524	2.683	-0.3211	2336.846154	0.053660849	-0.032112802	20	0	13.9997	36.4972	0
1281	3.8019	182.57	111.599	2.6846	-0.3207	2340.641026	0.053691649	-0.032069602	20	0	14.0005	36.4974	0
1282	3.802	182.9	111.671	2.6859	-0.3204	2344.846154	0.053717399	-0.032038802	20	0	14.0001	36.4975	0
1283	3.8021	183.23	111.749	2.6873	-0.32	2349.076923	0.053745699	-0.031998602	20	0	14.0005	36.4979	0
1284	3.8022	183.56	111.829	2.689	-0.3195	2353.282051	0.053779049	-0.031950602	20	0	14.0001	36.498	0
1285	3.8023	183.87	111.905	2.6903	-0.3192	2357.282051	0.053806699	-0.031916002	20	0	14.0005	36.4978	0
1286	3.8024	184.2	111.988	2.6919	-0.3186	2361.487179	0.053837499	-0.031864002	20	0	14.0001	36.4978	0
1287	3.8025	184.57	112.074	2.6935	-0.3181	2366.333333	0.053869549	-0.031813602	20	0	14.0001	36.4977	0
1288	3.8025	184.9	112.155	2.6951	-0.3177	2370.538462	0.053902899	-0.031765402	20	0	14.0001	36.4974	0
1289	3.8026	185.26	112.242	2.6968	-0.3172	2375.179487	0.053936199	-0.031715802	20	0	14.0005	36.4971	0
1290	3.8027	185.61	112.325	2.6985	-0.3167	2379.589744	0.053969499	-0.031669402	20	0	14.0009	36.4968	0
1291	3.8028	185.97	112.415	2.7	-0.3161	2384.230769	0.054000949	-0.031611002	20	0	14.0005	36.4964	0
1292	3.8029	186.35	112.508	2.702	-0.3157	2389.076923	0.054039299	-0.031568601	20	0	14.0009	36.4959	0
1293	3.803	186.71	112.595	2.7037	-0.3152	2393.717949	0.054074499	-0.031519601	20	0	14.0005	36.4956	0
1294	3.8031	187.12	112.691	2.7055	-0.3146	2398.974359	0.054110349	-0.031464601	20	0	14.0005	36.4954	0
1295	3.8032	187.48	112.782	2.7072	-0.3142	2403.615385	0.054144899	-0.031420401	20	0	14.0001	36.4953	0
1296	3.8032	187.88	112.881	2.7092	-0.3136	2408.666667	0.054183899	-0.031363801	20	0	13.9997	36.4953	0
1297	3.8033	188.3	112.98	2.7111	-0.313	2414.128205	0.054222249	-0.031301401	20	0	14.0001	36.4954	0
1298	3.8034	188.68	113.076	2.7131	-0.3123	2418.974359	0.054261249	-0.031231401	20	0	14.0009	36.4954	0
1299	3.8035	189.09	113.18	2.7149	-0.3118	2424.25641	0.054298949	-0.031182601	20	0	14.0009	36.4953	0
1300	3.8036	189.53	113.284	2.7171	-0.3112	2429.923077	0.054341049	-0.031121001	20	0	14.0001	36.4952	0
1301	3.8037	189.93	113.384	2.7191	-0.3107	2434.974359	0.054381299	-0.031066001	20	0	14.0005	36.495	0
1302	3.8038	190.36	113.492	2.7211	-0.31	2440.461538	0.054422149	-0.031002201	20	0	14.0001	36.4949	0
1303	3.8039	190.77	113.594	2.7233	-0.3094	2445.717949	0.054466199	-0.030936801	20	0	14.0001	36.4948	0
1304	3.8039	191.21	113.706	2.7254	-0.3087	2451.410256	0.054508299	-0.030873001	20	0	14.0001	36.4948	0
1305	3.804	191.67	113.817	2.7275	-0.3081	2457.307692	0.054550449	-0.030812201	20	0	14.0001	36.4948	0
1306	3.8041	192.11	113.923	2.7297	-0.3075	2463	0.054594449	-0.030753201	20	0	14.0005	36.4948	0
1307	3.8042	192.56	114.038	2.7321	-0.3068	2468.666667	0.054641599	-0.030682401	20	0	13.9997	36.4947	0
1308	3.8043	193.03	114.154	2.7345	-0.3062	2474.794872	0.054689349	-0.030616201	20	0	14.0001	36.4947	0
1309	3.8044	193.46	114.265	2.7366	-0.3055	2480.25641	0.054732099	-0.030550001	20	0	14.0009	36.4947	0
1310	3.8045	193.94	114.385	2.7389	-0.3048	2486.358974	0.054778649	-0.030475201	20	0	14.0005	36.4946	0
1311	3.8045	194.38	114.498	2.7412	-0.304	2492.051282	0.054824549	-0.030401001	20	0	14.0005	36.4946	0
1312	3.8046	194.91	114.62	2.7438	-0.3034	2498.794872	0.054876099	-0.030342001	20	0	14.0009	36.4945	0
1313	3.8047	195.38	114.743	2.7461	-0.3025	2504.897436	0.054922599	-0.030249801	20	0	14.0001	36.4944	0
1314	3.8048	195.84	114.86	2.7485	-0.3019	2510.794872	0.054970399	-0.030185201	20	0	13.9997	36.4943	0
1315	3.8049	196.33	114.986	2.7511	-0.3011	2517.102564	0.055021949	-0.030112001	20	0	14.0005	36.4941	0
1316	3.805	196.84	115.115	2.7536	-0.3004	2523.641026	0.055071599	-0.030042601	20	0	14.0001	36.4941	0
1317	3.8051	197.32	115.235	2.7561	-0.2997	2529.74359	0.055121899	-0.029965401	20	0	14.0001	36.4941	0
1318	3.8052	197.85	115.366	2.7586	-0.2987	2536.487179	0.055172849	-0.029872601	20	0	14.0001	36.4942	0
1319	3.8052	198.36	115.49	2.7613	-0.298	2543.025641	0.055225649	-0.029801601	20	0	13.9997	36.4944	0
1320	3.8053	198.88	115.623	2.764	-0.2973	2549.74359	0.055279699	-0.029733001	20	0	13.9997	36.4947	0
1321	3.8054	199.37	115.757	2.7667	-0.2964	2556.076923	0.055333749	-0.029643201	20	0	14.0001	36.4948	0
1322	3.8055	199.92	115.884	2.7692	-0.2956	2563.025641	0.055384699	-0.029557401	20	0	14.0009	36.4946	0
1323	3.8056	200.46	116.021	2.7721	-0.2948	2569.974359	0.055442549	-0.029478601	20	0	14.0005	36.4944	0
1324	3.8057	201	116.159	2.7749	-0.294	2576.923077	0.055497849	-0.029403001	20	0	14.0005	36.4941	0
1325	3.8058	201.49	116.29	2.7776	-0.2931	2583.230769	0.055551899	-0.029312401	20	0	14.0001	36.4938	0
1326	3.8058	202.05	116.431	2.7806	-0.2924	2590.384615	0.055611649	-0.029235201	20	0	14.0001	36.4935	0
1327	3.8059	202.61	116.573	2.7835	-0.2914	2597.564103	0.055670749	-0.029137601	20	0	14.0005	36.4935	0
1328	3.806	203.12	116.707	2.7863	-0.2906	2604.076923	0.055725449	-0.029060401	20	0	13.9997	36.4934	0
1329	3.8061	203.71	116.852	2.7893	-0.2898	2611.666667	0.055785799	-0.028976001	20	0	13.9993	36.4934	0
1330	3.8062	204.24	116.988	2.792	-0.2888	2618.410256	0.055839849	-0.028884001	20	0	14.0001	36.4938	0
1331	3.8063	204.79	117.135	2.7951	-0.2879	2625.564103	0.055902099	-0.028794201	20	0	14.0001	36.4938	0
1332	3.8064	205.37	117.283	2.7982	-0.2871	2632.923077	0.055964349	-0.028705801	20	0	14.0005	36.4939	0
1333	3.8065	205.94	117.422	2.8012	-0.2861	2640.307692	0.056023449	-0.028613001	20	0	14.0005	36.4939	0
1334	3.8065	206.5	117.573	2.8042	-0.2851	2647.461538	0.056083149	-0.028510601	20	0	14.0013	36.4938	0
1335	3.8066	207.09	117.724	2.8074	-0.2842	2655.051282	0.056147899	-0.028420001	20	0	14.0001	36.4935	0
1336	3.8067	207.65	117.867	2.8104	-0.2832	2662.205128	0.056207649	-0.028323801	20	0	14.0005	36.4931	0
1337	3.8068	208.26	118.02	2.8136	-0.2824	2670	0.056271149	-0.028244201	20	0	14.0001	36.4928	0
1338	3.8069	208.82	118.165	2.8167	-0.2814	2677.153846	0.056333399	-0.028143401	20	0	14.0001	36.4928	0
1339	3.807	209.41	118.32	2.8199	-0.2804	2684.74359	0.056398149	-0.028035601	20	0	13.9997	36.4928	0
1340	3.8071	210.02	118.476	2.8232	-0.2795	2692.538462	0.056464799	-0.027946401	20	0	13.9997	36.493	0
1341	3.8071	210.61	118.624	2.8263	-0.2785	2700.102564	0.056525749	-0.027854401	20	0	14.0001	36.493	0
1342	3.8072	211.2	118.782	2.8296	-0.2775	2707.692308	0.056591749	-0.027745601	20	0	13.9997	36.493	0
1343	3.8073	211.84	118.941	2.833	-0.2765	2715.897436	0.056660949	-0.027648801	20	0	14.0001	36.493	0
1344	3.8074	212.4	119.092	2.8362	-0.276	2723.076923	0.056723799	-0.027602201	20	0	14.0005	36.493	0
1345	3.8075	213.04	119.252	2.8397	-0.2751	2731.282051	0.056793599	-0.027511601	20	0	14.0009	36.4928	0
1346	3.8076	213.63	119.404	2.8429	-0.2741	2738.846154	0.056857099	-0.027413201	20	0	14.0013	36.4922	0
1347	3.8077	214.26	119.568	2.8465	-0.273	2746.871795	0.056929349	-0.027301401	20	0	14.0001	36.4919	0
1348	3.8078	214.9	119.732	2.8501	-0.2719	2755.076923	0.057002299	-0.027194201	20	0	13.9993	36.4919	0
1349	3.8078	215.5	119.885	2.8534	-0.2709	2762.871795	0.057067049	-0.027089401	20	0	13.9993	36.4921	0
1350	3.8079	216.11	120.051	2.8571	-0.2698	2770.666667	0.057141249	-0.026983801	20	0	13.9993	36.4924	0
1351	3.808	216.72	120.206	2.8605	-0.2688	2778.435897	0.057210399	-0.026879201	20	0	13.9993	36.4928	0
1352	3.8081	217.38	120.373	2.8642	-0.2677	2786.871795	0.057283299	-0.026769601	20	0	13.9997	36.493	0
1353	3.8082	218.02	120.54	2.8679	-0.2666	2795.076923	0.057358749	-0.026661601	20	0	14.0005	36.4932	0
1354	3.8083	218.62	120.698	2.8715	-0.2656	2802.871795	0.057429799	-0.026558601	20	0	14.0001	36.4934	0
1355	3.8084	219.26	120.866	2.8752	-0.2645	2811.076923	0.057503349	-0.026446601	20	0	14.0009	36.4935	0
1356	3.8085	219.94	121.036	2.879	-0.2634	2819.717949	0.057580699	-0.026337201	20	0	14.0001	36.4935	0
1357	3.8085	220.56	121.196	2.8826	-0.2623	2827.717949	0.057651749	-0.026229201	20	0	14.0001	36.4936	0
1358	3.8086	221.2	121.367	2.8865	-0.2612	2835.948718	0.057729699	-0.026124401	20	0	14.0001	36.4935	0
1359	3.8087	221.88	121.539	2.8903	-0.26	2844.564103	0.057805749	-0.026003201	20	0	14.0009	36.4933	0
1360	3.8088	222.48	121.701	2.8939	-0.259	2852.358974	0.057877449	-0.025900001	20	0	14.0005	36.4929	0
1361	3.8089	223.16	121.875	2.8978	-0.2579	2861	0.057955399	-0.025785801	20	0	14.0005	36.4926	0
1362	3.809	223.78	122.037	2.9015	-0.2567	2869	0.058030849	-0.025671601	20	0	14.0017	36.4919	0
1363	3.8091	224.47	122.213	2.9055	-0.2556	2877.846154	0.058109399	-0.025562001	20	0	14.0005	36.4912	0
1364	3.8091	225.11	122.388	2.9095	-0.2544	2886.051282	0.058189249	-0.025443801	20	0	14.0009	36.4911	0
1365	3.8092	225.75	122.554	2.9132	-0.2533	2894.282051	0.058264049	-0.025328001	20	0	13.9997	36.4911	0
1366	3.8093	226.43	122.732	2.9172	-0.2522	2902.897436	0.058343299	-0.025215401	20	0	13.9997	36.4915	0
1367	3.8094	227.12	122.91	2.9212	-0.251	2911.74359	0.058423149	-0.025098801	20	0	14.0005	36.4915	0
1368	3.8095	227.76	123.077	2.925	-0.2498	2919.948718	0.058499849	-0.024981401	20	0	14.0005	36.4917	0
1369	3.8096	228.43	123.255	2.9291	-0.2487	2928.589744	0.058581549	-0.024869601	20	0	14.0005	36.4917	0
1370	3.8097	229.09	123.423	2.9329	-0.2476	2937.025641	0.058658249	-0.024756201	20	0	14.0001	36.4916	0
1371	3.8098	229.76	123.602	2.937	-0.2463	2945.641026	0.058739349	-0.024634801	20	0	14.0001	36.4914	0
1372	3.8098	230.43	123.782	2.9411	-0.2451	2954.282051	0.058821099	-0.024511201	20	0	14.0001	36.4913	0
1373	3.8099	231.09	123.952	2.9449	-0.244	2962.717949	0.058897799	-0.024397801	20	0	14.0009	36.491	0
1374	3.81	231.78	124.133	2.9492	-0.2428	2971.564103	0.058984549	-0.024276401	20	0	14.0001	36.4906	0
1375	3.8101	232.44	124.303	2.953	-0.2416	2979.974359	0.059060599	-0.024158201	20	0	14.0009	36.4903	0
1376	3.8102	233.13	124.486	2.9571	-0.2403	2988.820513	0.059142999	-0.024033801	20	0	13.9997	36.4903	0
1377	3.8103	233.8	124.667	2.9614	-0.2391	2997.461538	0.059227849	-0.023907801	20	0	14.0001	36.4903	0
1378	3.8104	234.48	124.839	2.9654	-0.2379	3006.102564	0.059307049	-0.023786401	20	0	13.9997	36.4905	0
1379	3.8104	235.18	125.022	2.9695	-0.2367	3015.153846	0.059390049	-0.023666801	20	0	13.9997	36.4908	0
1380	3.8105	235.87	125.206	2.9739	-0.2354	3024	0.059477449	-0.023537601	20	0	14.0001	36.4911	0
1381	3.8106	236.53	125.379	2.9779	-0.2343	3032.410256	0.059557899	-0.023429601	20	0	14.0001	36.4912	0
1382	3.8107	237.22	125.563	2.9822	-0.233	3041.25641	0.059644649	-0.023296401	20	0	14.0005	36.4912	0
1383	3.8108	237.84	125.736	2.9864	-0.2317	3049.25641	0.059727049	-0.023172001	20	0	14.0005	36.4912	0
1384	3.8109	238.58	125.921	2.9907	-0.2305	3058.74359	0.059813149	-0.023050801	20	0	14.0009	36.491	0
1385	3.811	239.27	126.106	2.9951	-0.2292	3067.589744	0.059901149	-0.022920001	20	0	14.0009	36.4907	0
1386	3.8111	239.93	126.28	2.9991	-0.228	3076	0.059981649	-0.022798601	20	0	14.0009	36.4903	0
1387	3.8111	240.62	126.465	3.0034	-0.2268	3084.846154	0.060068399	-0.022675801	20	0	14.0017	36.4898	0
1388	3.8112	241.31	126.652	3.0079	-0.2253	3093.692308	0.060157699	-0.022534801	20	0	14.0001	36.4895	0
1389	3.8113	241.97	126.826	3.0119	-0.2244	3102.128205	0.060238799	-0.022435401	20	0	14.0001	36.4895	0
1390	3.8114	242.65	127.013	3.0164	-0.2229	3110.948718	0.060328699	-0.022293601	20	0	13.9993	36.4896	0
1391	3.8115	243.38	127.199	3.021	-0.2216	3120.230769	0.060419199	-0.022160601	20	0	13.9997	36.4899	0
1392	3.8116	244.03	127.374	3.025	-0.2203	3128.641026	0.060500949	-0.022033001	20	0	14.0001	36.49	0
1393	3.8117	244.74	127.56	3.0295	-0.2191	3137.717949	0.060589599	-0.021912401	20	0	14.0005	36.4902	0
1394	3.8117	245.4	127.734	3.0337	-0.218	3146.128205	0.060673849	-0.021795001	20	0	13.9997	36.4903	0
1395	3.8118	246.09	127.921	3.038	-0.2166	3154.974359	0.060760599	-0.021659601	20	0	14.0001	36.4903	0
1396	3.8119	246.79	128.108	3.0426	-0.2153	3164.025641	0.060851099	-0.021533601	20	0	14.0001	36.4903	0
1397	3.812	247.43	128.283	3.0468	-0.2143	3172.230769	0.060935999	-0.021427201	20	0	14.0001	36.4902	0
1398	3.8121	248.16	128.471	3.0514	-0.213	3181.512821	0.061028399	-0.021297201	20	0	14.0005	36.49	0
1399	3.8122	248.83	128.646	3.0556	-0.2116	3190.153846	0.061112649	-0.021160201	20	0	14.0009	36.4896	0
1400	3.8123	249.52	128.833	3.0602	-0.2103	3198.974359	0.061204449	-0.021033401	20	0	14.0013	36.4892	0
1401	3.8124	250.21	129.021	3.0648	-0.209	3207.820513	0.061296249	-0.020900201	20	0	13.9993	36.4889	0
1402	3.8124	250.9	129.196	3.0691	-0.2078	3216.666667	0.061381749	-0.020778801	20	0	14.0005	36.4889	0
1403	3.8125	251.59	129.383	3.0736	-0.2064	3225.512821	0.061472249	-0.020639401	20	0	14.0005	36.4889	0
1404	3.8126	252.28	129.57	3.0782	-0.2051	3234.358974	0.061564699	-0.020507801	20	0	13.9993	36.4889	0
1405	3.8127	252.92	129.744	3.0824	-0.2039	3242.564103	0.061648899	-0.020389001	20	0	14.0001	36.4891	0
1406	3.8128	253.64	129.931	3.0871	-0.2025	3251.846154	0.061741349	-0.020250201	20	0	13.9997	36.4891	0
1407	3.8129	254.32	130.118	3.0916	-0.2013	3260.487179	0.061832499	-0.020129001	20	0	14.0001	36.4891	0
1408	3.813	254.99	130.293	3.0959	-0.1998	3269.102564	0.061917999	-0.019979401	20	0	14.0009	36.489	0
1409	3.8131	255.68	130.479	3.1005	-0.1988	3277.948718	0.062010399	-0.019876201	20	0	14.0009	36.4888	0
1410	3.8131	256.32	130.653	3.1048	-0.1974	3286.179487	0.062096549	-0.019738201	20	0	14.0005	36.4884	0
1411	3.8132	257.01	130.839	3.1095	-0.1961	3295	0.062190199	-0.019611401	20	0	13.9993	36.488	0
1412	3.8133	257.75	131.025	3.1142	-0.1947	3304.487179	0.062283249	-0.019470401	20	0	14.0001	36.488	0
1413	3.8134	258.36	131.2	3.1186	-0.1935	3312.282051	0.062371899	-0.019345201	20	0	13.9997	36.4881	0
1414	3.8135	259.01	131.385	3.1231	-0.1919	3320.692308	0.062462449	-0.019193201	20	0	13.9997	36.4884	0
1415	3.8136	259.75	131.569	3.1278	-0.1907	3330.179487	0.062556099	-0.019065601	20	0	14.0001	36.4887	0
1416	3.8137	260.38	131.742	3.1322	-0.1894	3338.179487	0.062644149	-0.018938801	20	0	14.0005	36.489	0
1417	3.8137	261.07	131.926	3.1368	-0.188	3347.025641	0.062735299	-0.018804001	20	0	13.9997	36.489	0
1418	3.8138	261.68	132.099	3.1411	-0.187	3354.820513	0.062822699	-0.018702401	20	0	14.0005	36.4891	0
1419	3.8139	262.38	132.284	3.1458	-0.1857	3363.871795	0.062916349	-0.018567601	20	0	14.0001	36.4894	0
1420	3.814	263.07	132.469	3.1504	-0.1843	3372.717949	0.063008749	-0.018429801	20	0	14.0001	36.4894	0
1421	3.8141	263.73	132.641	3.1548	-0.1831	3381.153846	0.063095549	-0.018308601	20	0	14.0001	36.4893	0
1422	3.8142	264.4	132.824	3.1594	-0.1818	3389.769231	0.063188549	-0.018180201	20	0	14.0005	36.4892	0
1423	3.8143	265.04	133.007	3.1641	-0.1804	3398	0.063282849	-0.018043001	20	0	14.0005	36.4888	0
1424	3.8144	265.7	133.178	3.1685	-0.179	3406.410256	0.063369649	-0.017900401	20	0	14.0009	36.4883	0
1425	3.8144	266.36	133.359	3.1733	-0.1776	3414.846154	0.063465799	-0.017763401	20	0	14.0013	36.4876	0
1426	3.8145	266.98	133.529	3.1776	-0.1767	3422.846154	0.063551949	-0.017666601	20	0	14.0009	36.4872	0
1427	3.8146	267.64	133.709	3.1822	-0.1753	3431.25641	0.063643099	-0.017529401	20	0	13.9997	36.4872	0
1428	3.8147	268.3	133.889	3.1867	-0.174	3439.692308	0.063734899	-0.017401001	20	0	14.0001	36.4874	0
1429	3.8148	268.92	134.059	3.1911	-0.1726	3447.692308	0.063821049	-0.017264001	20	0	13.9997	36.4877	0
1430	3.8149	269.63	134.238	3.1957	-0.1712	3456.74359	0.063914049	-0.017116601	20	0	13.9993	36.4881	0
1431	3.815	270.18	134.405	3.1999	-0.1699	3463.897436	0.063998949	-0.016986001	20	0	14.0001	36.4885	0
1432	3.815	270.86	134.584	3.2047	-0.1688	3472.538462	0.064094499	-0.016881201	20	0	13.9989	36.4887	0
1433	3.8151	271.5	134.763	3.2093	-0.1674	3480.74359	0.064186899	-0.016742401	20	0	13.9997	36.4891	0
1434	3.8152	272.12	134.929	3.2137	-0.1663	3488.74359	0.064274949	-0.016629801	20	0	14.0001	36.4891	0
1435	3.8153	272.76	135.105	3.2184	-0.165	3496.974359	0.064367349	-0.016496001	20	0	14.0005	36.4894	0
1436	3.8154	273.4	135.282	3.223	-0.1638	3505.179487	0.064459149	-0.016375401	20	0	14.0005	36.4895	0
1437	3.8155	274.01	135.447	3.2273	-0.1624	3512.974359	0.064545899	-0.016242201	20	0	14.0001	36.4895	0
1438	3.8156	274.65	135.621	3.2319	-0.1611	3521.179487	0.064637699	-0.016112401	20	0	14.0001	36.4894	0
1439	3.8157	275.28	135.797	3.2365	-0.1596	3529.179487	0.064730749	-0.015956401	20	0	14.0005	36.4892	0
1440	3.8157	275.85	135.959	3.2409	-0.1584	3536.564103	0.064817499	-0.015836601	20	0	14.0009	36.4888	0
1441	3.8158	276.51	136.132	3.2454	-0.1572	3544.974359	0.064908649	-0.015719201	20	0	14.0005	36.4883	0
1442	3.8159	277.1	136.294	3.2498	-0.1558	3552.564103	0.064995399	-0.015582201	20	0	14.0009	36.4878	0
1443	3.816	277.69	136.466	3.2544	-0.1545	3560.128205	0.065087199	-0.015451401	20	0	14.0009	36.4872	0
1444	3.8161	278.31	136.637	3.259	-0.1533	3568.128205	0.065180899	-0.015328601	20	0	14.0001	36.4867	0
1445	3.8162	278.91	136.797	3.2633	-0.1521	3575.717949	0.065265749	-0.015208001	20	0	14.0001	36.4864	0
1446	3.8163	279.5	136.967	3.2678	-0.1507	3583.307692	0.065356299	-0.015074001	20	0	13.9993	36.4863	0
1447	3.8163	280.12	137.136	3.2723	-0.1497	3591.307692	0.065445549	-0.014972401	20	0	13.9993	36.4866	0
1448	3.8164	280.71	137.293	3.2766	-0.1485	3598.897436	0.065531699	-0.014848001	20	0	13.9989	36.487	0
1449	3.8165	281.3	137.461	3.2811	-0.147	3606.461538	0.065622199	-0.014702201	20	0	14.0001	36.4874	0
1450	3.8166	281.85	137.617	3.2854	-0.1459	3613.410256	0.065707099	-0.014592001	20	0	13.9997	36.4878	0
1451	3.8167	282.45	137.783	3.2898	-0.1447	3621.205128	0.065795099	-0.014466801	20	0	13.9997	36.488	0
1452	3.8168	283.05	137.948	3.2942	-0.1434	3628.794872	0.065883749	-0.014342201	20	0	13.9997	36.4883	0
1453	3.8169	283.62	138.102	3.2982	-0.1424	3636.153846	0.065964849	-0.014239001	20	0	13.9997	36.4885	0
1454	3.817	284.18	138.265	3.3027	-0.1413	3643.307692	0.066054749	-0.014127201	20	0	14.0005	36.4887	0
1455	3.817	284.79	138.426	3.3071	-0.1401	3651.102564	0.066142749	-0.014009801	20	0	14.0005	36.4887	0
1456	3.8171	285.31	138.578	3.3112	-0.1389	3657.846154	0.066223849	-0.013890001	20	0	14.0005	36.4886	0
1457	3.8172	285.85	138.739	3.3157	-0.1377	3664.794872	0.066314399	-0.013770401	20	0	14.0009	36.4885	0
1458	3.8173	286.41	138.888	3.3197	-0.1364	3671.948718	0.066394849	-0.013639601	20	0	14.0001	36.4883	0
1459	3.8174	286.97	139.047	3.324	-0.1352	3679.128205	0.066480349	-0.013519001	20	0	14.0005	36.488	0
1460	3.8175	287.55	139.204	3.3284	-0.1343	3686.487179	0.066568399	-0.013430801	20	0	14.0009	36.4878	0
1461	3.8176	288.06	139.352	3.3324	-0.133	3693.025641	0.066648249	-0.013296201	20	0	14.0005	36.4875	0
1462	3.8177	288.61	139.507	3.3368	-0.1317	3700.179487	0.066735599	-0.013173201	20	0	14.0005	36.4872	0
1463	3.8177	289.14	139.653	3.3408	-0.1308	3706.923077	0.066815449	-0.013078801	20	0	14.0009	36.4869	0
1464	3.8178	289.67	139.805	3.345	-0.1295	3713.666667	0.066900949	-0.012948801	20	0	14.0013	36.4863	0
1465	3.8179	290.21	139.959	3.3494	-0.1284	3720.615385	0.066988349	-0.012843201	20	0	14.0009	36.4859	0
1466	3.818	290.7	140.101	3.3532	-0.1272	3726.923077	0.067064399	-0.012724201	20	0	13.9993	36.4855	0
1467	3.8181	291.21	140.251	3.3573	-0.1261	3733.461538	0.067146148	-0.012607601	20	0	14.0001	36.4856	0
1468	3.8182	291.75	140.4	3.3614	-0.1248	3740.410256	0.067227898	-0.012482401	20	0	13.9997	36.4858	0
1469	3.8183	292.24	140.539	3.3653	-0.1238	3746.717949	0.067305848	-0.012380001	20	0	13.9993	36.4863	0
1470	3.8183	292.77	140.687	3.3693	-0.1229	3753.461538	0.067385048	-0.012291801	20	0	13.9993	36.4866	0
1471	3.8184	293.21	140.824	3.3731	-0.1217	3759.128205	0.067462398	-0.012168001	20	0	13.9997	36.487	0
1472	3.8185	293.72	140.969	3.3771	-0.1206	3765.666667	0.067542848	-0.012060201	20	0	13.9997	36.487	0
1473	3.8186	294.26	141.111	3.3812	-0.1193	3772.615385	0.067624598	-0.011931001	20	0	13.9997	36.4874	0
1474	3.8187	294.71	141.244	3.3851	-0.1185	3778.307692	0.067701298	-0.011847401	20	0	13.9993	36.4879	0
1475	3.8188	295.2	141.385	3.3889	-0.1174	3784.615385	0.067777998	-0.011738801	20	0	13.9997	36.488	0
1476	3.8189	295.68	141.526	3.3928	-0.1161	3790.717949	0.067856548	-0.011611201	20	0	13.9997	36.4882	0
1477	3.819	296.14	141.656	3.3964	-0.115	3796.615385	0.067928848	-0.011503201	20	0	14.0005	36.4883	0
1478	3.819	296.61	141.794	3.4004	-0.1142	3802.74359	0.068007448	-0.011421401	20	0	14.0001	36.4882	0
1479	3.8191	297.06	141.922	3.4039	-0.1131	3808.410256	0.068078498	-0.011305601	20	0	13.9997	36.4881	0
1480	3.8192	297.5	142.057	3.4077	-0.1121	3814.102564	0.068153948	-0.011211801	20	0	14.0005	36.4879	0
1481	3.8193	297.99	142.192	3.4115	-0.111	3820.410256	0.068229998	-0.011102201	20	0	14.0009	36.4874	0
1482	3.8194	298.4	142.316	3.415	-0.1101	3825.692308	0.068300398	-0.011006201	20	0	14.0009	36.487	0
1483	3.8195	298.88	142.447	3.4187	-0.109	3831.794872	0.068374598	-0.010904601	20	0	14.0009	36.4865	0
1484	3.8196	299.31	142.578	3.4224	-0.108	3837.25641	0.068447548	-0.010798201	20	0	14.0005	36.4861	0
1485	3.8196	299.72	142.699	3.426	-0.1072	3842.538462	0.068519198	-0.010717801	20	0	14.0009	36.4857	0
1486	3.8197	300.14	142.826	3.4295	-0.106	3848	0.068590248	-0.010603601	20	0	14.0009	36.4854	0
1487	3.8198	300.6	142.952	3.433	-0.1051	3853.897436	0.068660648	-0.0105114	20	0	13.9997	36.485	0
1488	3.8199	300.95	143.069	3.4365	-0.1042	3858.333333	0.068729798	-0.010417	20	0	13.9997	36.485	0
1489	3.82	301.39	143.192	3.44	-0.1032	3864	0.068800198	-0.0103162	20	0	14.0001	36.485	0
1490	3.8201	301.79	143.306	3.4432	-0.1023	3869.076923	0.068864998	-0.010231	20	0	13.9997	36.4853	0
1491	3.8202	302.16	143.427	3.4469	-0.1013	3873.897436	0.068937298	-0.0101286	20	0	14.0001	36.4856	0
1492	3.8203	302.61	143.546	3.4503	-0.1004	3879.589744	0.069005148	-0.0100444	20	0	13.9997	36.4857	0
1493	3.8203	302.97	143.656	3.4536	-0.0994	3884.230769	0.069071198	-0.0099396	20	0	14.0001	36.4861	0
1494	3.8204	303.36	143.772	3.4569	-0.0984	3889.282051	0.069137848	-0.0098388	20	0	14.0005	36.4861	0
1495	3.8205	303.73	143.886	3.4603	-0.0976	3893.923077	0.069205098	-0.009756	20	0	13.9997	36.4861	0
1496	3.8206	304.09	143.991	3.4634	-0.0969	3898.538462	0.069267948	-0.0096876	20	0	14.0009	36.4862	0
1497	3.8207	304.43	144.102	3.4666	-0.0959	3902.974359	0.069332698	-0.0095866	20	0	14.0001	36.4862	0
1498	3.8208	304.81	144.206	3.4697	-0.0951	3907.820513	0.069393698	-0.0095072	20	0	13.9997	36.4861	0
1499	3.8209	305.17	144.315	3.4729	-0.094	3912.435897	0.069458448	-0.0094048	20	0	14.0001	36.4861	0
1500	3.821	305.52	144.422	3.4762	-0.0936	3916.871795	0.069523848	-0.0093566	20	0	14.0005	36.4861	0
1501	3.821	305.84	144.522	3.4791	-0.0926	3921.076923	0.069582298	-0.0092558	20	0	14.0001	36.4861	0
1502	3.8211	306.19	144.626	3.4823	-0.0919	3925.512821	0.069645798	-0.0091912	20	0	14.0001	36.486	0
1503	3.8212	306.53	144.729	3.4853	-0.091	3929.923077	0.069706148	-0.0091006	20	0	14.0001	36.4858	0
1504	3.8213	306.83	144.824	3.4882	-0.0903	3933.717949	0.069763998	-0.0090298	20	0	14.0001	36.4856	0
1505	3.8214	307.16	144.923	3.4911	-0.0895	3937.923077	0.069822448	-0.0089454	20	0	14.0001	36.4855	0
1506	3.8215	307.45	145.015	3.4939	-0.0885	3941.717949	0.069877798	-0.008851	20	0	14.0009	36.4854	0
1507	3.8216	307.78	145.111	3.4968	-0.088	3945.923077	0.069936898	-0.008795	20	0	14.0001	36.4851	0
1508	3.8216	308.09	145.206	3.4997	-0.0872	3949.923077	0.069994748	-0.0087194	20	0	14.0005	36.4848	0
1509	3.8217	308.34	145.293	3.5023	-0.0864	3953.076923	0.070046898	-0.0086374	20	0	14.0005	36.4846	0
1510	3.8218	308.65	145.386	3.5053	-0.0856	3957.102564	0.070105348	-0.0085594	20	0	14.0005	36.4844	0
1511	3.8219	308.93	145.477	3.5079	-0.085	3960.666667	0.070158798	-0.0085004	20	0	13.9993	36.4844	0
1512	3.822	309.2	145.56	3.5104	-0.0843	3964.051282	0.070208498	-0.0084326	20	0	13.9993	36.4846	0
1513	3.8221	309.46	145.648	3.5132	-0.0837	3967.410256	0.070263798	-0.0083672	20	0	13.9993	36.4849	0
1514	3.8222	309.72	145.728	3.5157	-0.0829	3970.769231	0.070313448	-0.0082932	20	0	13.9989	36.4851	0
1515	3.8223	309.98	145.813	3.5182	-0.0823	3974.153846	0.070364998	-0.0082262	20	0	13.9993	36.4856	0
1516	3.8223	310.25	145.895	3.5209	-0.0817	3977.512821	0.070418448	-0.008168	20	0	14.0001	36.4858	0
1517	3.8224	310.49	145.971	3.5233	-0.0808	3980.666667	0.070465598	-0.0080774	20	0	13.9993	36.4862	0
1518	3.8225	310.74	146.05	3.5256	-0.0803	3983.846154	0.070512148	-0.0080332	20	0	13.9993	36.4865	0
1519	3.8226	310.94	146.123	3.528	-0.0797	3986.358974	0.070560548	-0.0079686	20	0	13.9993	36.4867	0
1520	3.8227	311.17	146.2	3.5304	-0.0791	3989.307692	0.070607048	-0.007908	20	0	13.9993	36.4871	0
1521	3.8228	311.38	146.274	3.5327	-0.0784	3992.051282	0.070654848	-0.0078394	20	0	13.9997	36.4875	0
1522	3.8229	311.61	146.343	3.5349	-0.0779	3995	0.070697598	-0.0077852	20	0	14.0001	36.488	0
1523	3.8229	311.81	146.415	3.537	-0.0772	3997.512821	0.070740998	-0.007715	20	0	13.9993	36.4884	0
1524	3.823	312	146.484	3.5393	-0.0764	4000.051282	0.070785598	-0.0076442	20	0	13.9997	36.4889	0
1525	3.8231	312.2	146.548	3.5412	-0.0761	4002.564103	0.070824598	-0.0076102	20	0	13.9993	36.489	0
1526	3.8232	312.38	146.614	3.5434	-0.0754	4004.897436	0.070868598	-0.007544	20	0	14.0005	36.4896	0
1527	3.8233	312.55	146.674	3.5453	-0.0748	4007	0.070906948	-0.0074756	20	0	14.0001	36.4896	0
1528	3.8234	312.73	146.739	3.5473	-0.0743	4009.307692	0.070945948	-0.0074266	20	0	14.0001	36.4896	0
1529	3.8235	312.87	146.8	3.5494	-0.0738	4011.205128	0.070987398	-0.0073818	20	0	14.0009	36.4897	0
1530	3.8236	313.06	146.856	3.5512	-0.0732	4013.538462	0.071023898	-0.0073236	20	0	14.0001	36.4898	0
1531	3.8236	313.19	146.913	3.553	-0.0728	4015.205128	0.071059098	-0.0072826	20	0	14.0001	36.4899	0
1532	3.8237	313.37	146.97	3.5548	-0.0726	4017.538462	0.071095548	-0.007259	20	0	14.0001	36.49	0
1533	3.8238	313.48	147.021	3.5565	-0.0722	4019	0.071130748	-0.0072164	20	0	13.9997	36.4904	0
1534	3.8239	313.65	147.074	3.5582	-0.0716	4021.102564	0.071164698	-0.0071558	20	0	14.0001	36.4904	0
1535	3.824	313.76	147.122	3.5599	-0.0709	4022.589744	0.071197398	-0.0070856	20	0	13.9997	36.4907	0
1536	3.8241	313.88	147.172	3.5615	-0.0705	4024.051282	0.071230698	-0.0070534	20	0	13.9997	36.4905	0
1537	3.8242	314.11	147.264	3.5645	-0.0699	4027	0.071289798	-0.0069934	20	0	14.0001	36.4903	0
1538	3.8244	314.27	147.352	3.5675	-0.0689	4029.102564	0.071350148	-0.0068926	20	0	14.0009	36.49	0
1539	3.8245	314.37	147.391	3.5689	-0.0688	4030.384615	0.071377848	-0.0068848	20	0	14.0001	36.4899	0
1540	3.8247	314.53	147.468	3.5716	-0.0679	4032.487179	0.071431248	-0.006791	20	0	13.9997	36.4897	0
1541	3.8249	314.68	147.566	3.5751	-0.0671	4034.384615	0.071501048	-0.0067138	20	0	14.0005	36.4897	0
1542	3.8252	314.8	147.652	3.5782	-0.0663	4035.846154	0.071563298	-0.0066288	20	0	14.0001	36.4897	0
1543	3.8262	314.65	147.855	3.587	-0.0636	4033.948718	0.071740598	-0.0063648	20	0	14.0001	36.4904	0
1544	3.8264	314.52	147.866	3.5879	-0.0636	4032.25641	0.071757548	-0.0063586	20	0	14.0005	36.4905	0
1545	3.8266	314.37	147.871	3.5886	-0.0631	4030.384615	0.071771398	-0.0063058	20	0	13.9997	36.4908	0
1546	3.8268	314.2	147.873	3.589	-0.0632	4028.25641	0.071780798	-0.0063176	20	0	14.0005	36.4908	0
1547	3.8269	314.01	147.863	3.5896	-0.0629	4025.74359	0.071791498	-0.0062852	20	0	14.0001	36.491	0
1548	3.827	313.88	147.858	3.5896	-0.0626	4024.051282	0.071792148	-0.0062624	20	0	14.0001	36.4911	0
1549	3.8271	313.74	147.851	3.5898	-0.0627	4022.358974	0.071796548	-0.0062718	20	0	13.9993	36.4911	0
1550	3.8273	313.51	147.833	3.59	-0.0625	4019.410256	0.071799698	-0.0062514	20	0	13.9993	36.4915	0
1551	3.8274	313.35	147.822	3.5901	-0.0624	4017.307692	0.071802848	-0.0062364	20	0	13.9989	36.4916	0
1552	3.8275	313.2	147.809	3.5903	-0.0624	4015.410256	0.071805348	-0.0062404	20	0	13.9997	36.4919	0
1553	3.8275	313.06	147.798	3.5902	-0.0624	4013.538462	0.071804098	-0.0062412	20	0	14.0005	36.4921	0
1554	3.8276	312.89	147.783	3.5904	-0.0624	4011.410256	0.071808498	-0.006238	20	0	13.9997	36.4919	0
1555	3.8277	312.71	147.769	3.5903	-0.0624	4009.102564	0.071805948	-0.0062396	20	0	14.0005	36.4918	0
1556	3.8278	312.53	147.754	3.5903	-0.0623	4006.794872	0.071806598	-0.0062332	20	0	14.0001	36.4917	0
1557	3.8279	312.38	147.74	3.5904	-0.0623	4004.897436	0.071807848	-0.0062348	20	0	14.0009	36.4915	0
1558	3.828	312.17	147.726	3.5904	-0.0623	4002.153846	0.071807848	-0.006227	20	0	14.0005	36.4913	0
1559	3.8281	311.97	147.711	3.5903	-0.0622	3999.615385	0.071806598	-0.0062238	20	0	14.0001	36.4912	0
1560	3.8282	311.74	147.695	3.5903	-0.0623	3996.692308	0.071806598	-0.0062254	20	0	14.0005	36.4911	0
1561	3.8282	311.56	147.68	3.5903	-0.0622	3994.358974	0.071806598	-0.0062198	20	0	14.0001	36.491	0
1562	3.8283	311.31	147.663	3.5903	-0.0622	3991.205128	0.071805948	-0.0062184	20	0	13.9997	36.491	0
1563	3.8284	311.13	147.646	3.5903	-0.0622	3988.897436	0.071805348	-0.0062246	20	0	14.0001	36.491	0
1564	3.8285	310.9	147.63	3.5903	-0.0621	3985.948718	0.071805348	-0.0062104	20	0	14.0001	36.491	0
1565	3.8286	310.66	147.611	3.5901	-0.0622	3982.769231	0.071801548	-0.0062206	20	0	14.0001	36.4911	0
1566	3.8287	310.43	147.593	3.5902	-0.0619	3979.820513	0.071803448	-0.0061946	20	0	14.0001	36.4911	0
1567	3.8288	310.11	147.573	3.5901	-0.0621	3975.820513	0.071801548	-0.006212	20	0	14.0001	36.4914	0
1568	3.8288	309.92	147.554	3.59	-0.0622	3973.307692	0.071800948	-0.006216	20	0	14.0001	36.4918	0
1569	3.8289	309.64	147.534	3.5898	-0.0623	3969.717949	0.071796548	-0.0062286	20	0	14.0001	36.4917	0
1570	3.829	309.39	147.513	3.5898	-0.0622	3966.564103	0.071796548	-0.0062152	20	0	14.0001	36.4918	0
1571	3.8291	309.13	147.493	3.5896	-0.062	3963.205128	0.071792748	-0.0061954	20	0	13.9997	36.4917	0
1572	3.8292	308.85	147.47	3.5896	-0.062	3959.615385	0.071791498	-0.0062042	20	0	14.0001	36.4919	0
1573	3.8293	308.55	147.447	3.5895	-0.0621	3955.820513	0.071789598	-0.0062088	20	0	13.9989	36.4918	0
1574	3.8294	308.26	147.424	3.5893	-0.0623	3952.025641	0.071785198	-0.0062294	20	0	13.9997	36.4921	0
1575	3.8295	307.96	147.4	3.5894	-0.0621	3948.25641	0.071787098	-0.006205	20	0	13.9997	36.4922	0
1576	3.8295	307.67	147.376	3.5891	-0.062	3944.461538	0.071782098	-0.0061962	20	0	13.9989	36.4922	0
1577	3.8296	307.36	147.35	3.5889	-0.0621	3940.461538	0.071778948	-0.006205	20	0	13.9997	36.4924	0
1578	3.8297	307.01	147.323	3.5889	-0.0621	3936.025641	0.071777698	-0.006212	20	0	13.9993	36.4924	0
1579	3.8298	306.73	147.299	3.5886	-0.0621	3932.461538	0.071772648	-0.0062058	20	0	13.9997	36.4929	0
1580	3.8299	306.39	147.27	3.5884	-0.0624	3928.025641	0.071768248	-0.0062388	20	0	14.0009	36.4936	0
1581	3.83	306.04	147.241	3.5882	-0.0623	3923.615385	0.071764498	-0.0062302	20	0	14.0005	36.4935	0
1582	3.8301	305.71	147.214	3.588	-0.0622	3919.384615	0.071760098	-0.006223	20	0	14.0001	36.4934	0
1583	3.8302	305.37	147.184	3.5877	-0.0624	3914.974359	0.071753148	-0.0062388	20	0	14.0005	36.4933	0
1584	3.8302	305.02	147.154	3.5875	-0.0623	3910.538462	0.071749998	-0.0062278	20	0	14.0005	36.4931	0
1585	3.8303	304.65	147.123	3.5873	-0.0624	3905.717949	0.071745598	-0.006242	20	0	14.0005	36.493	0
1586	3.8304	304.3	147.09	3.587	-0.0624	3901.282051	0.071739348	-0.0062396	20	0	14.0005	36.4928	0
1587	3.8305	303.96	147.058	3.5868	-0.0624	3896.871795	0.071735548	-0.0062388	20	0	14.0001	36.4927	0
1588	3.8306	303.58	147.023	3.5865	-0.0624	3892.025641	0.071729248	-0.0062396	20	0	14.0001	36.4926	0
1589	3.8307	303.2	146.987	3.5861	-0.0626	3887.179487	0.071722348	-0.0062576	20	0	14.0001	36.4926	0
1590	3.8308	302.82	146.952	3.5857	-0.0627	3882.333333	0.071714798	-0.0062656	20	0	14.0001	36.4926	0
1591	3.8308	302.43	146.913	3.5853	-0.0626	3877.282051	0.071706648	-0.0062554	20	0	13.9997	36.4926	0
1592	3.8309	302.03	146.874	3.5849	-0.0627	3872.230769	0.071697198	-0.0062718	20	0	14.0001	36.4926	0
1593	3.831	301.66	146.835	3.5844	-0.0629	3867.384615	0.071687798	-0.0062884	20	0	13.9997	36.4928	0
1594	3.8311	301.26	146.792	3.5839	-0.0628	3862.333333	0.071677098	-0.0062758	20	0	14.0001	36.4928	0
1595	3.8312	300.88	146.748	3.5833	-0.0629	3857.487179	0.071665148	-0.0062884	20	0	13.9993	36.4929	0
1596	3.8313	300.47	146.698	3.5825	-0.0628	3852.230769	0.071650048	-0.006279	20	0	13.9997	36.493	0
1597	3.8314	300.06	146.645	3.5815	-0.063	3846.948718	0.071630548	-0.006297	20	0	14.0005	36.493	0
1598	3.8315	299.67	146.592	3.5806	-0.0633	3841.897436	0.071612348	-0.0063318	20	0	13.9993	36.4931	0
1599	3.8315	299.24	146.531	3.5795	-0.0633	3836.435897	0.071589048	-0.0063278	20	0	14.0001	36.4936	0
1600	3.8316	298.83	146.472	3.5783	-0.0636	3831.153846	0.071565798	-0.0063616	20	0	13.9997	36.4937	0
1601	3.8317	298.4	146.406	3.577	-0.0635	3825.692308	0.071540648	-0.0063474	20	0	13.9993	36.4938	0
1602	3.8318	297.94	146.336	3.5757	-0.0636	3819.794872	0.071513648	-0.0063578	20	0	14.0001	36.4939	0
1603	3.8319	297.52	146.27	3.5742	-0.0639	3814.307692	0.071484098	-0.0063908	20	0	14.0001	36.4942	0
1604	3.832	297.02	146.197	3.5727	-0.0641	3808	0.071454548	-0.0064136	20	0	13.9997	36.4943	0
1605	3.8321	296.61	146.123	3.5712	-0.0645	3802.74359	0.071424348	-0.0064484	20	0	13.9993	36.4945	0
1606	3.8321	296.14	146.052	3.5697	-0.0644	3796.615385	0.071393548	-0.0064372	20	0	13.9993	36.4947	0
1607	3.8322	295.64	145.974	3.568	-0.0647	3790.307692	0.071360848	-0.006472	20	0	13.9997	36.495	0
1608	3.8323	295.23	145.901	3.5665	-0.0646	3785.051282	0.071329448	-0.0064626	20	0	14.0005	36.4956	0
1609	3.8324	294.72	145.823	3.5647	-0.065	3778.512821	0.071294198	-0.0065018	20	0	13.9997	36.4956	0
1610	3.8325	294.23	145.742	3.563	-0.0652	3772.205128	0.071260898	-0.00652	20	0	14.0001	36.4955	0
1611	3.8326	293.74	145.665	3.5614	-0.0656	3765.871795	0.071228198	-0.0065626	20	0	14.0005	36.4953	0
1612	3.8327	293.25	145.584	3.5596	-0.0658	3759.564103	0.071191748	-0.0065798	20	0	13.9997	36.4953	0
1613	3.8328	292.72	145.5	3.5578	-0.066	3752.820513	0.071156548	-0.0066004	20	0	14.0005	36.4952	0
1614	3.8328	292.26	145.421	3.5561	-0.0662	3746.923077	0.071121948	-0.0066184	20	0	14.0001	36.495	0
1615	3.8329	291.73	145.335	3.5542	-0.0664	3740.179487	0.071084848	-0.0066374	20	0	14.0009	36.495	0
1616	3.833	291.26	145.254	3.5525	-0.0665	3734.076923	0.071049048	-0.0066484	20	0	14.0001	36.495	0
1617	3.8331	290.72	145.165	3.5506	-0.067	3727.128205	0.071011298	-0.006698	20	0	14.0001	36.495	0
1618	3.8332	290.21	145.076	3.5486	-0.0673	3720.615385	0.070971048	-0.0067272	20	0	13.9997	36.4951	0
1619	3.8333	289.65	144.992	3.5468	-0.0675	3713.435897	0.070935248	-0.0067484	20	0	14.0005	36.4952	0
1620	3.8334	289.12	144.901	3.5447	-0.0675	3706.692308	0.070894998	-0.0067468	20	0	13.9993	36.4954	0
1621	3.8335	288.58	144.809	3.5426	-0.0678	3699.74359	0.070852248	-0.0067846	20	0	13.9989	36.4955	0
1622	3.8335	288.07	144.722	3.5408	-0.0682	3693.230769	0.070816398	-0.0068202	20	0	13.9997	36.4958	0
1623	3.8336	287.51	144.628	3.5387	-0.0685	3686.076923	0.070773648	-0.0068454	20	0	13.9997	36.4962	0
1624	3.8337	286.97	144.539	3.5368	-0.0688	3679.128205	0.070735948	-0.0068752	20	0	14.0001	36.4969	0
1625	3.8338	286.4	144.444	3.5348	-0.069	3671.74359	0.070695098	-0.0068958	20	0	14.0009	36.4973	0
1626	3.8339	285.85	144.348	3.5326	-0.0691	3664.794872	0.070652348	-0.0069138	20	0	14.0005	36.4972	0
1627	3.834	285.31	144.257	3.5306	-0.0693	3657.846154	0.070612698	-0.0069336	20	0	14.0001	36.4972	0
1628	3.8341	284.74	144.159	3.5285	-0.0696	3650.487179	0.070569948	-0.006962	20	0	13.9997	36.4972	0
1629	3.8341	284.16	144.06	3.5263	-0.0701	3643.102564	0.070525948	-0.0070084	20	0	14.0001	36.4972	0
1630	3.8342	283.6	143.966	3.5243	-0.0703	3635.948718	0.070485098	-0.0070328	20	0	14.0001	36.4974	0
1631	3.8343	283.03	143.865	3.5219	-0.0707	3628.589744	0.070438598	-0.0070738	20	0	13.9993	36.4974	0
1632	3.8344	282.47	143.77	3.5199	-0.0709	3621.410256	0.070397098	-0.007092	20	0	14.0001	36.4978	0
1633	3.8345	281.88	143.668	3.5177	-0.0714	3613.846154	0.070354348	-0.007136	20	0	13.9989	36.4978	0
1634	3.8346	281.26	143.565	3.5153	-0.0717	3605.846154	0.070306548	-0.0071698	20	0	13.9993	36.4981	0
1635	3.8347	280.71	143.467	3.5132	-0.0719	3598.897436	0.070263798	-0.0071912	20	0	13.9997	36.4987	0
1636	3.8348	280.11	143.362	3.5109	-0.0723	3591.102564	0.070217898	-0.0072306	20	0	14.0005	36.4989	0
1637	3.8348	279.5	143.256	3.5085	-0.0727	3583.307692	0.070170748	-0.0072668	20	0	13.9997	36.4987	0
1638	3.8349	278.91	143.156	3.5063	-0.0732	3575.717949	0.070126098	-0.0073212	20	0	14.0005	36.4985	0
1639	3.835	278.33	143.049	3.504	-0.0734	3568.358974	0.070080248	-0.0073376	20	0	13.9997	36.4983	0
1640	3.8351	277.69	142.94	3.5015	-0.0739	3560.128205	0.070030548	-0.0073896	20	0	13.9997	36.4983	0
1641	3.8352	277.12	142.838	3.4993	-0.0742	3552.769231	0.069985298	-0.0074244	20	0	14.0009	36.4986	0
1642	3.8353	276.48	142.73	3.4969	-0.0744	3544.564103	0.069938148	-0.0074424	20	0	13.9997	36.4984	0
1643	3.8354	275.87	142.626	3.4946	-0.075	3536.769231	0.069891598	-0.0075046	20	0	13.9997	36.4984	0
1644	3.8354	275.26	142.514	3.4921	-0.0754	3528.974359	0.069841948	-0.007541	20	0	14.0001	36.4984	0
1645	3.8355	274.62	142.403	3.4896	-0.0758	3520.769231	0.069792898	-0.0075788	20	0	13.9993	36.4985	0
1646	3.8356	274.03	142.297	3.4873	-0.0761	3513.179487	0.069745148	-0.0076056	20	0	13.9997	36.4988	0
1647	3.8357	273.37	142.184	3.4847	-0.0766	3504.74359	0.069693598	-0.0076576	20	0	13.9993	36.4992	0
1648	3.8358	272.73	142.07	3.4821	-0.0769	3496.538462	0.069642048	-0.0076898	20	0	14.0009	36.4998	0
1649	3.8359	272.14	141.962	3.4799	-0.0772	3488.948718	0.069597398	-0.007722	20	0	14.0013	36.4997	0
1650	3.836	271.47	141.847	3.4772	-0.0776	3480.333333	0.069544598	-0.0077638	20	0	14.0013	36.4995	0
1651	3.8361	270.89	141.738	3.4748	-0.0781	3472.948718	0.069495548	-0.0078056	20	0	14.0013	36.4991	0
1652	3.8361	270.22	141.621	3.4722	-0.0787	3464.333333	0.069443998	-0.007867	20	0	14.0005	36.4987	0
1653	3.8362	269.54	141.503	3.4696	-0.0791	3455.692308	0.069391798	-0.007912	20	0	14.0005	36.4984	0
1654	3.8363	268.97	141.393	3.4671	-0.0795	3448.307692	0.069342798	-0.0079498	20	0	14.0009	36.4981	0
1655	3.8364	268.3	141.274	3.4645	-0.0801	3439.692308	0.069289348	-0.008008	20	0	14.0009	36.498	0
1656	3.8365	267.61	141.155	3.4619	-0.0806	3430.846154	0.069237798	-0.0080616	20	0	14.0009	36.4976	0
1657	3.8366	266.98	141.044	3.4593	-0.081	3422.846154	0.069186248	-0.0081002	20	0	14.0001	36.4974	0
1658	3.8367	266.32	140.923	3.4568	-0.0814	3414.410256	0.069136548	-0.008142	20	0	14.0001	36.4974	0
1659	3.8367	265.72	140.81	3.4542	-0.0819	3406.615385	0.069084398	-0.008186	20	0	14.0001	36.4974	0
1660	3.8368	265.03	140.688	3.4516	-0.0824	3397.769231	0.069031598	-0.0082358	20	0	13.9997	36.4974	0
1661	3.8369	264.35	140.566	3.4488	-0.0828	3389.153846	0.068975648	-0.0082798	20	0	14.0001	36.4974	0
1662	3.837	263.73	140.451	3.4463	-0.0832	3381.153846	0.068925348	-0.0083248	20	0	14.0001	36.4974	0
1663	3.8371	263.02	140.327	3.4435	-0.0838	3372.076923	0.068869998	-0.0083838	20	0	13.9997	36.4974	0
1664	3.8372	262.41	140.211	3.441	-0.0845	3364.282051	0.068819098	-0.008446	20	0	13.9993	36.4975	0
1665	3.8373	261.74	140.086	3.4382	-0.0849	3355.666667	0.068764398	-0.0084918	20	0	13.9989	36.4977	0
1666	3.8374	261.07	139.961	3.4356	-0.0855	3347.025641	0.068711598	-0.0085524	20	0	13.9997	36.4979	0
1667	3.8374	260.39	139.843	3.4329	-0.0859	3338.384615	0.068657498	-0.0085926	20	0	13.9997	36.4982	0
1668	3.8375	259.72	139.719	3.4302	-0.0866	3329.769231	0.068603448	-0.0086602	20	0	13.9993	36.4988	0
1669	3.8376	259.05	139.592	3.4273	-0.0871	3321.128205	0.068546848	-0.0087108	20	0	13.9993	36.4995	0
1670	3.8377	258.39	139.473	3.4247	-0.0876	3312.692308	0.068494048	-0.0087634	20	0	13.9989	36.5001	0
1671	3.8378	257.7	139.345	3.4219	-0.088	3303.846154	0.068438098	-0.0087998	20	0	14.0013	36.5009	0
1672	3.8379	257.04	139.226	3.4192	-0.0884	3295.435897	0.068384048	-0.0088406	20	0	14.0013	36.5005	0
1673	3.838	256.39	139.097	3.4163	-0.0891	3287	0.068326798	-0.0089092	20	0	14.0009	36.4998	0
1674	3.8381	255.65	138.968	3.4136	-0.0898	3277.538462	0.068272748	-0.008977	20	0	14.0001	36.4991	0
1675	3.8381	254.99	138.847	3.4109	-0.0903	3269.102564	0.068218048	-0.0090282	20	0	14.0005	36.4986	0
1676	3.8382	254.3	138.718	3.408	-0.0909	3260.25641	0.068160198	-0.0090896	20	0	14.0005	36.4982	0
1677	3.8383	253.63	138.588	3.4052	-0.0914	3251.641026	0.068104898	-0.0091368	20	0	14.0001	36.4982	0
1678	3.8384	252.95	138.467	3.4027	-0.0921	3243	0.068053348	-0.009207	20	0	13.9993	36.4981	0
1679	3.8385	252.26	138.337	3.3996	-0.0925	3234.153846	0.067991748	-0.0092472	20	0	14.0005	36.4981	0
1680	3.8386	251.61	138.215	3.397	-0.093	3225.717949	0.067939548	-0.0093016	20	0	14.0001	36.498	0
1681	3.8387	250.92	138.084	3.3941	-0.0936	3216.897436	0.067881098	-0.0093606	20	0	14.0001	36.498	0
1682	3.8387	250.21	137.952	3.3911	-0.0942	3207.820513	0.067821998	-0.0094188	20	0	14.0001	36.498	0
1683	3.8388	249.54	137.829	3.3885	-0.0948	3199.205128	0.067769798	-0.009478	20	0	14.0001	36.498	0
1684	3.8389	248.85	137.697	3.3855	-0.0955	3190.358974	0.067710698	-0.0095488	20	0	13.9997	36.498	0
1685	3.839	248.17	137.565	3.3826	-0.0961	3181.717949	0.067652248	-0.0096056	20	0	13.9997	36.498	0
1686	3.8391	247.47	137.441	3.3799	-0.0966	3172.666667	0.067598798	-0.0096638	20	0	14.0001	36.4983	0
1687	3.8392	246.78	137.308	3.377	-0.0971	3163.820513	0.067540348	-0.0097128	20.01	0	13.9993	36.4985	0
1688	3.8393	246.14	137.183	3.3743	-0.0979	3155.615385	0.067485648	-0.0097852	20	0	13.9993	36.4989	0
1689	3.8394	245.45	137.051	3.3714	-0.0984	3146.769231	0.067428448	-0.0098388	20	0	13.9989	36.499	0
1690	3.8394	244.74	136.918	3.3684	-0.0991	3137.717949	0.067368098	-0.009908	20	0	13.9997	36.4994	0
1691	3.8395	244.08	136.793	3.3658	-0.0996	3129.282051	0.067315898	-0.0099624	20	0	13.9989	36.4999	0
1692	3.8396	243.38	136.659	3.3629	-0.1001	3120.230769	0.067258048	-0.0100136	20	0	13.9989	36.5006	0
1693	3.8397	242.69	136.525	3.3598	-0.1008	3111.384615	0.067196448	-0.0100758	20	0	13.9993	36.5011	0
1694	3.8398	242.03	136.4	3.3571	-0.1013	3102.948718	0.067142398	-0.0101278	20	0	14.0001	36.5018	0
1695	3.8399	241.31	136.266	3.3541	-0.1021	3093.692308	0.067081999	-0.010213	20	0	14.0017	36.5018	0
1696	3.84	240.67	136.14	3.3514	-0.1026	3085.487179	0.067027349	-0.0102594	20	0	14.0013	36.5014	0
1697	3.84	239.98	136.006	3.3484	-0.1034	3076.641026	0.066967599	-0.0103382	20	0	14.0013	36.5009	0
1698	3.8401	239.24	135.87	3.3454	-0.104	3067.153846	0.066908499	-0.0103996	20	0	14.0009	36.5003	0
1699	3.8402	238.61	135.744	3.3427	-0.1045	3059.153846	0.066854449	-0.0104532	20	0	14.0013	36.4997	0
1700	3.8403	237.92	135.61	3.3398	-0.1051	3050.307692	0.066795949	-0.0105068	20	0	14.0005	36.4992	0
1701	3.8404	237.2	135.476	3.3367	-0.1057	3041.051282	0.066734999	-0.010565801	20	0	14.0009	36.4988	0
1702	3.8405	236.56	135.349	3.334	-0.1063	3032.846154	0.066680899	-0.010634401	20	0	14.0009	36.4986	0
1703	3.8406	235.85	135.214	3.331	-0.1072	3023.769231	0.066619949	-0.010717001	20	0	14.0009	36.4985	0
1704	3.8407	235.16	135.079	3.328	-0.1077	3014.923077	0.066560199	-0.010772201	20	0	14.0001	36.4984	0
1705	3.8407	234.51	134.953	3.3254	-0.1083	3006.512821	0.066507399	-0.010831401	20	0	14.0001	36.4985	0
1706	3.8408	233.8	134.818	3.3224	-0.1088	2997.461538	0.066448299	-0.010882601	20.01	0	14.0005	36.4984	0
1707	3.8409	233.16	134.692	3.3197	-0.1094	2989.230769	0.066394849	-0.010944001	20	0	14.0005	36.4985	0
1708	3.841	232.47	134.557	3.3167	-0.1101	2980.410256	0.066333249	-0.011014801	20	0	13.9993	36.4985	0
1709	3.8411	231.78	134.422	3.3137	-0.111	2971.564103	0.066274149	-0.011100001	20	0	14.0001	36.4987	0
1710	3.8412	231.14	134.295	3.3109	-0.1115	2963.333333	0.066217599	-0.011146401	20	0	13.9997	36.4989	0
1711	3.8413	230.48	134.161	3.308	-0.1121	2954.923077	0.066160999	-0.011210201	20	0	13.9993	36.4991	0
1712	3.8413	229.79	134.035	3.3053	-0.1126	2946.076923	0.066105049	-0.011263001	20	0	13.9989	36.4996	0
1713	3.8414	229.14	133.9	3.3024	-0.1134	2937.641026	0.066047199	-0.011337801	20	0	13.9993	36.5001	0
1714	3.8415	228.43	133.766	3.2994	-0.114	2928.589744	0.065988099	-0.011402401	20	0	13.9985	36.5009	0
1715	3.8416	227.79	133.64	3.2967	-0.1145	2920.384615	0.065933399	-0.011448801	20	0	13.9993	36.5015	0
1716	3.8417	227.13	133.504	3.2938	-0.1151	2911.948718	0.065876199	-0.011512601	20	0	13.9997	36.5023	0
1717	3.8418	226.44	133.369	3.2907	-0.1157	2903.102564	0.065814599	-0.011574201	20	0	14.0009	36.5027	0
1718	3.8419	225.82	133.243	3.288	-0.1166	2895.102564	0.065759899	-0.011659201	20	0	14.0013	36.5027	0
1719	3.842	225.15	133.109	3.2852	-0.1172	2886.487179	0.065703949	-0.011723801	20	0	14.0005	36.5025	0
1720	3.842	224.52	132.985	3.2824	-0.1178	2878.487179	0.065648599	-0.011781401	20	0	13.9997	36.5022	0
1721	3.8421	223.85	132.851	3.2795	-0.1185	2869.846154	0.065590799	-0.011849001	20	0	14.0001	36.5022	0
1722	3.8422	223.16	132.718	3.2767	-0.1193	2861	0.065533549	-0.011928601	20	0	13.9997	36.5021	0
1723	3.8423	222.53	132.593	3.274	-0.1197	2853	0.065479499	-0.011966401	20	0	13.9997	36.502	0
1724	3.8424	221.88	132.459	3.2711	-0.1203	2844.564103	0.065421049	-0.012033401	20	0	14.0001	36.502	0
1725	3.8425	221.24	132.327	3.2682	-0.1209	2836.358974	0.065363799	-0.012090201	20	0	14.0001	36.5021	0
1726	3.8426	220.61	132.201	3.2656	-0.1215	2828.358974	0.065311649	-0.012145201	20	0	13.9997	36.5021	0
1727	3.8427	219.92	132.069	3.2627	-0.1223	2819.512821	0.065253199	-0.012231201	20	0	13.9997	36.5021	0
1728	3.8427	219.3	131.937	3.2597	-0.1229	2811.512821	0.065194699	-0.012292601	20	0	13.9997	36.5022	0
1729	3.8428	218.67	131.813	3.2572	-0.1235	2803.512821	0.065143149	-0.012352401	20	0	13.9993	36.5024	0
1730	3.8429	218.02	131.681	3.2543	-0.1241	2795.076923	0.065086549	-0.012414601	20	0	13.9993	36.5027	0
1731	3.843	217.44	131.558	3.2516	-0.1246	2787.717949	0.065031899	-0.012464201	20	0	13.9993	36.503	0
1732	3.8431	216.77	131.428	3.2488	-0.1253	2779.076923	0.064976549	-0.012529601	20	0	14.0013	36.5039	0
1733	3.8432	216.13	131.297	3.246	-0.1259	2770.871795	0.064920599	-0.012591201	20	0	14.0013	36.5032	0
1734	3.8433	215.55	131.176	3.2434	-0.1265	2763.487179	0.064868399	-0.012654201	20	0	14.0013	36.5024	0
1735	3.8433	214.91	131.046	3.2406	-0.1272	2755.282051	0.064811849	-0.012717201	20	0	14.0017	36.5018	0
1736	3.8434	214.3	130.924	3.238	-0.1278	2747.487179	0.064759049	-0.012779401	20	0	14.0013	36.5011	0
1737	3.8435	213.68	130.797	3.2354	-0.1285	2739.487179	0.064707499	-0.012845601	20	0	14.0013	36.5004	0
1738	3.8436	213.06	130.669	3.2325	-0.1291	2731.487179	0.064650249	-0.012914801	20	0	14.0009	36.4998	0
1739	3.8437	212.45	130.55	3.2299	-0.1297	2723.692308	0.064598099	-0.012973201	20	0	14.0005	36.4992	0
1740	3.8438	211.84	130.423	3.2274	-0.1305	2715.897436	0.064547149	-0.013048001	20	0	14.0009	36.4988	0
1741	3.8439	211.23	130.296	3.2245	-0.131	2708.102564	0.064490599	-0.013098401	20	0	14.0005	36.4986	0
1742	3.844	210.64	130.178	3.2219	-0.1317	2700.538462	0.064437749	-0.013165401	20	0	13.9997	36.4985	0
1743	3.844	210.07	130.052	3.2192	-0.1323	2693.153846	0.064384349	-0.013234601	20	0	13.9997	36.4985	0
1744	3.8441	209.49	129.933	3.2168	-0.1329	2685.794872	0.064335299	-0.013288201	20	0	14.0001	36.4985	0
1745	3.8442	208.88	129.808	3.214	-0.1335	2678	0.064280599	-0.013348201	20	0	14.0001	36.4985	0
1746	3.8443	208.28	129.684	3.2113	-0.1341	2670.205128	0.064225899	-0.013412001	20	0	13.9997	36.4985	0
1747	3.8444	207.73	129.568	3.2089	-0.1348	2663.25641	0.064178099	-0.013476601	20	0	13.9997	36.4985	0
1748	3.8445	207.13	129.445	3.2063	-0.1352	2655.461538	0.064126549	-0.013523001	20	0	13.9989	36.4987	0
1749	3.8446	206.54	129.321	3.2036	-0.1358	2647.897436	0.064071899	-0.013583601	20	0	13.9993	36.499	0
1750	3.8446	205.99	129.207	3.2012	-0.1366	2640.948718	0.064024699	-0.013657001	20	0	13.9997	36.4994	0
1751	3.8447	205.42	129.086	3.1988	-0.1371	2633.564103	0.063975699	-0.013707401	20	0	13.9993	36.4999	0
1752	3.8448	204.86	128.972	3.1964	-0.1377	2626.410256	0.063927899	-0.013769601	20	0	13.9989	36.5006	0
1753	3.8449	204.28	128.852	3.1937	-0.1383	2619.025641	0.063874449	-0.013834201	20	0	13.9989	36.5013	0
1754	3.845	203.73	128.731	3.1913	-0.1388	2611.871795	0.063825449	-0.013879001	20	0	13.9989	36.5018	0
1755	3.8451	203.2	128.62	3.189	-0.1393	2605.128205	0.063779549	-0.013928001	20	0	13.9989	36.5024	0
1756	3.8452	202.68	128.502	3.1864	-0.1399	2598.410256	0.063728599	-0.013992401	20	0	14.0001	36.5031	0
1757	3.8453	202.08	128.385	3.1839	-0.1405	2590.820513	0.063678299	-0.014050801	20	0	13.9993	36.5035	0
1758	3.8453	201.56	128.275	3.1817	-0.141	2584.076923	0.063633049	-0.014102001	20	0	13.9997	36.504	0
1759	3.8454	201.02	128.159	3.1791	-0.1417	2577.128205	0.063581499	-0.014165801	20	0	14.0017	36.5046	0
1760	3.8455	200.46	128.044	3.1767	-0.1424	2569.974359	0.063533099	-0.014236001	20	0	14.0013	36.5039	0
1761	3.8456	199.98	127.937	3.1745	-0.1428	2563.871795	0.063489099	-0.014276801	20	0	14.0013	36.5028	0
1762	3.8457	199.42	127.823	3.172	-0.1434	2556.692308	0.063439399	-0.014337601	20	0	14.0009	36.502	0
1763	3.8458	198.95	127.717	3.1698	-0.144	2550.589744	0.063396049	-0.014396601	20	0	14.0009	36.5013	0
1764	3.8459	198.42	127.605	3.1674	-0.1445	2543.846154	0.063348899	-0.014445401	20	0	14.0009	36.5006	0
1765	3.846	197.88	127.493	3.165	-0.145	2536.897436	0.063300499	-0.014504601	20	0	14.0009	36.5	0
1766	3.846	197.39	127.389	3.1629	-0.1456	2530.589744	0.063258349	-0.014558801	20	0	14.0001	36.4996	0
1767	3.8461	196.88	127.28	3.1606	-0.1462	2524.051282	0.063212449	-0.014618801	20	0	14.0005	36.4995	0
1768	3.8462	196.42	127.177	3.1585	-0.1468	2518.153846	0.063169699	-0.014681001	20	0	13.9997	36.4995	0
1769	3.8463	195.92	127.068	3.1562	-0.1475	2511.846154	0.063123199	-0.014749601	20	0	13.9993	36.4995	0
1770	3.8464	195.41	126.961	3.154	-0.1479	2505.307692	0.063079199	-0.014789601	20	0	13.9997	36.4996	0
1771	3.8465	194.96	126.861	3.1519	-0.1484	2499.435897	0.063037699	-0.014837001	20	0	14.0001	36.4998	0
1772	3.8466	194.46	126.756	3.1497	-0.1489	2493.102564	0.062993699	-0.014885801	20	0	13.9989	36.5001	0
1773	3.8466	193.99	126.651	3.1474	-0.1492	2487	0.062948399	-0.014921201	20	0	13.9997	36.5002	0
1774	3.8467	193.54	126.553	3.1453	-0.1496	2481.307692	0.062906299	-0.014964601	20	0	13.9997	36.5005	0
1775	3.8468	193.07	126.45	3.1432	-0.1505	2475.205128	0.062864799	-0.015052001	20	0	13.9993	36.5009	0
1776	3.8469	192.62	126.355	3.1412	-0.1509	2469.512821	0.062824549	-0.015093001	20	0	13.9989	36.5014	0
1777	3.847	192.15	126.254	3.1392	-0.1515	2463.410256	0.062784349	-0.015145001	20	0	13.9989	36.5019	0
1778	3.8471	191.7	126.155	3.137	-0.152	2457.717949	0.062740949	-0.015197801	20	0	13.9989	36.5026	0
1779	3.8472	191.28	126.062	3.1352	-0.1525	2452.25641	0.062703249	-0.015245001	20	0	13.9993	36.5033	0
1780	3.8473	190.82	125.964	3.1332	-0.1529	2446.358974	0.062663599	-0.015291401	20	0	13.9993	36.5038	0
1781	3.8473	190.39	125.867	3.131	-0.1534	2440.871795	0.062620249	-0.015343401	20	0	14.0001	36.5043	0
1782	3.8474	189.96	125.778	3.1293	-0.1537	2435.410256	0.062585049	-0.015372601	20	0	13.9997	36.5047	0
1783	3.8475	189.53	125.683	3.1273	-0.1543	2429.923077	0.062546049	-0.015425401	20	0	14.0017	36.5059	0
1784	3.8476	189.16	125.596	3.1254	-0.1547	2425.076923	0.062507099	-0.015469601	20	0	14.0021	36.5048	0
1785	3.8477	188.73	125.504	3.1236	-0.1553	2419.615385	0.062471249	-0.015527801	20	0	14.0025	36.5034	0
1786	3.8478	188.3	125.413	3.1217	-0.1556	2414.128205	0.062434149	-0.015562401	20	0	14.0021	36.5023	0
1787	3.8479	187.91	125.329	3.12	-0.1561	2409.076923	0.062399549	-0.015608201	20	0	14.0013	36.5015	0
1788	3.8479	187.53	125.239	3.1181	-0.1566	2404.230769	0.062362499	-0.015657001	20	0	14.0009	36.5008	0
1789	3.848	187.14	125.152	3.1163	-0.1571	2399.179487	0.062325999	-0.015706601	20	0	14.0005	36.5002	0
1790	3.8481	186.78	125.07	3.1147	-0.1576	2394.564103	0.062293299	-0.015757801	20	0	14.0005	36.4999	0
1791	3.8482	186.36	124.984	3.1128	-0.158	2389.282051	0.062256249	-0.015801201	20	0	13.9997	36.4997	0
1792	3.8483	186	124.906	3.1112	-0.1584	2384.666667	0.062224149	-0.015841401	20	0	14.0005	36.4997	0
1793	3.8484	185.63	124.823	3.1096	-0.1589	2379.820513	0.062192099	-0.015887001	20	0	14.0005	36.4993	0
1794	3.8485	185.26	124.74	3.1078	-0.1593	2375.179487	0.062156249	-0.015925601	20	0	14.0001	36.4992	0
1795	3.8486	184.94	124.664	3.1062	-0.1595	2370.974359	0.062124849	-0.015945401	20	0	13.9997	36.4992	0
1796	3.8486	184.57	124.584	3.1046	-0.1601	2366.333333	0.062092149	-0.016007601	20	0	14.0001	36.4992	0
1797	3.8487	184.23	124.505	3.103	-0.1604	2361.923077	0.062060099	-0.016035201	20	0	13.9997	36.4992	0
1798	3.8488	183.92	124.432	3.1014	-0.1609	2357.923077	0.062027999	-0.016089401	20	0	13.9997	36.4993	0
1799	3.8489	183.57	124.356	3.0999	-0.1613	2353.487179	0.061998449	-0.016128001	20	0	13.9997	36.4996	0
1800	3.849	183.23	124.281	3.0983	-0.1615	2349.076923	0.061966399	-0.016153201	20	0	13.9997	36.4996	0
1801	3.8491	182.92	124.212	3.097	-0.1618	2345.076923	0.061939349	-0.016176201	20	0	13.9993	36.4998	0
1802	3.8492	182.6	124.14	3.0955	-0.1622	2341.076923	0.061909799	-0.016218601	20	0	13.9997	36.5001	0
1803	3.8492	182.29	124.073	3.0941	-0.1625	2337.051282	0.061881549	-0.016254001	20	0	13.9993	36.5001	0
1804	3.8493	181.98	124.003	3.0927	-0.1629	2333.051282	0.061853849	-0.016288801	20	0	13.9989	36.5005	0
1805	3.8494	181.67	123.935	3.0913	-0.1634	2329.051282	0.061825599	-0.016340801	20	0	13.9989	36.501	0
1806	3.8495	181.42	123.872	3.09	-0.1639	2325.897436	0.061799199	-0.016392001	20	0	13.9989	36.5015	0
1807	3.8496	181.12	123.805	3.0886	-0.1641	2322.102564	0.061771499	-0.016408401	20	0	13.9997	36.502	0
1808	3.8497	180.85	123.741	3.0872	-0.1643	2318.538462	0.061744499	-0.016429801	20	0	13.9997	36.5025	0
1809	3.8498	180.62	123.681	3.086	-0.1648	2315.589744	0.061720599	-0.016477001	20	0	13.9997	36.5028	0
1810	3.8499	180.32	123.62	3.0848	-0.1651	2311.794872	0.061696049	-0.016506201	20	0	13.9997	36.5033	0
1811	3.8499	180.07	123.563	3.0837	-0.1652	2308.641026	0.061674049	-0.016520401	20	0	13.9993	36.5038	0
1812	3.85	179.79	123.504	3.0824	-0.1658	2305.051282	0.061648899	-0.016577801	20	0	13.9997	36.5047	0
1813	3.8501	179.58	123.446	3.0812	-0.1659	2302.307692	0.061623749	-0.016590401	20	0	13.9997	36.5047	0
1814	3.8502	179.32	123.392	3.0802	-0.1662	2298.948718	0.061603649	-0.016624401	20	0	14.0001	36.5051	0
1815	3.8503	179.09	123.337	3.079	-0.1665	2296	0.061579749	-0.016648001	20	0	13.9997	36.505	0
1816	3.8504	178.84	123.283	3.0779	-0.1669	2292.846154	0.061557749	-0.016692001	20	0	13.9997	36.5052	0
1817	3.8505	178.63	123.234	3.0769	-0.1671	2290.102564	0.061538249	-0.016706201	20	0	14.0001	36.5058	0
1818	3.8506	178.43	123.183	3.0758	-0.1674	2287.564103	0.061516249	-0.016744801	20	0	14.0001	36.5057	0
1819	3.8506	178.25	123.136	3.0749	-0.1675	2285.25641	0.061498049	-0.016752801	20	0	14.0001	36.5054	0
1820	3.8507	178.04	123.088	3.074	-0.1679	2282.512821	0.061479149	-0.016785801	20	0	14.0005	36.5051	0
1821	3.8508	177.81	123.041	3.0729	-0.1681	2279.564103	0.061457149	-0.016807001	20	0	14.0013	36.5048	0
1822	3.8509	177.64	122.998	3.072	-0.1685	2277.461538	0.061439549	-0.016852801	20	0	14.0013	36.5044	0
1823	3.851	177.45	122.954	3.0711	-0.1688	2274.948718	0.061421349	-0.016878801	20	0	14.0005	36.5038	0
1824	3.8511	177.26	122.912	3.0702	-0.1689	2272.615385	0.061404349	-0.016890601	20	0	14.0009	36.5033	0
1825	3.8512	177.13	122.873	3.0694	-0.1691	2270.948718	0.061387999	-0.016914201	20	0	14.0005	36.5031	0
1826	3.8512	176.94	122.833	3.0686	-0.1694	2268.410256	0.061371049	-0.016943401	20	0	14.0005	36.5026	0
1827	3.8513	176.82	122.798	3.0679	-0.1696	2266.948718	0.061357199	-0.016963801	20	0	14.0005	36.5024	0
1828	3.8514	176.64	122.761	3.067	-0.1697	2264.615385	0.061340249	-0.016974001	20	0	14.0005	36.5021	0
1829	3.8515	176.48	122.726	3.0664	-0.17	2262.512821	0.061327049	-0.017000801	20	0	14.0005	36.502	0
1830	3.8516	176.36	122.694	3.0657	-0.17	2261.051282	0.061313199	-0.017004001	20	0	14.0005	36.502	0
1831	3.8517	176.23	122.662	3.065	-0.1701	2259.358974	0.061300649	-0.017014201	20	0	14.0001	36.5019	0
1832	3.8518	176.1	122.633	3.0643	-0.1706	2257.666667	0.061286799	-0.017059201	20	0	13.9989	36.5019	0
1833	3.8519	175.88	122.576	3.0631	-0.1706	2254.923077	0.061262899	-0.017061601	20	0	13.9997	36.5021	0
1834	3.8521	175.67	122.526	3.062	-0.1709	2252.205128	0.061240899	-0.017093001	20	0	13.9993	36.5025	0
1835	3.8523	175.51	122.481	3.0611	-0.1712	2250.102564	0.061222649	-0.017116601	20	0	13.9989	36.5032	0
1836	3.8525	175.38	122.443	3.0603	-0.1716	2248.410256	0.061206299	-0.017160801	20	0	13.9989	36.5035	0
1837	3.8526	175.23	122.409	3.0595	-0.1717	2246.512821	0.061190599	-0.017166201	20	0	13.9993	36.5038	0
1838	3.853	175.1	122.359	3.0583	-0.1723	2244.820513	0.061166099	-0.017227801	20	0	13.9997	36.5051	0
1839	3.854	175.26	122.338	3.0569	-0.1725	2246.923077	0.061138449	-0.017254601	20	0	14.0005	36.5023	0
1840	3.8542	175.39	122.35	3.0569	-0.1725	2248.615385	0.061137149	-0.017254601	20	0	14.0005	36.5017	0
1841	3.8544	175.54	122.365	3.057	-0.1726	2250.512821	0.061139049	-0.017258401	20	0	14.0005	36.5015	0
1842	3.8545	175.72	122.385	3.057	-0.1726	2252.820513	0.061140299	-0.017258401	20	0	14.0001	36.5012	0
1843	3.8546	175.84	122.396	3.057	-0.1728	2254.307692	0.061140299	-0.017278201	20	0	14.0001	36.5012	0
1844	3.8548	176.07	122.42	3.057	-0.1728	2257.25641	0.061140299	-0.017279001	20	0	14.0005	36.5009	0
1845	3.8549	176.2	122.433	3.057	-0.1727	2258.948718	0.061140949	-0.017265601	20	0	13.9997	36.5008	0
1846	3.855	176.31	122.446	3.0571	-0.1726	2260.410256	0.061142849	-0.017261601	20	0	13.9993	36.5008	0
1847	3.8551	176.43	122.459	3.0571	-0.1726	2261.871795	0.061142199	-0.017260801	20	0	14.0001	36.5009	0
1848	3.8552	176.59	122.473	3.0572	-0.1726	2264	0.061144699	-0.017263201	20	0	13.9997	36.501	0
1849	3.8552	176.74	122.489	3.0572	-0.1727	2265.897436	0.061144099	-0.017268001	20	0	14.0001	36.5012	0
1850	3.8553	176.87	122.504	3.0574	-0.1726	2267.564103	0.061147249	-0.017263201	20	0	14.0001	36.5011	0
1851	3.8554	177.07	122.521	3.0575	-0.1726	2270.102564	0.061149099	-0.017264801	20	0	14.0001	36.5011	0
1852	3.8555	177.2	122.536	3.0576	-0.1726	2271.769231	0.061151649	-0.017264001	20	0	14.0001	36.5011	0
1853	3.8556	177.4	122.555	3.0576	-0.1728	2274.307692	0.061152249	-0.017278201	20	0	14.0001	36.501	0
1854	3.8557	177.58	122.572	3.0577	-0.1726	2276.615385	0.061154749	-0.017260001	20	0	14.0001	36.501	0
1855	3.8558	177.76	122.59	3.0579	-0.1729	2278.948718	0.061158549	-0.017290001	20	0	14.0005	36.5009	0
1856	3.8558	177.92	122.611	3.0579	-0.1728	2281.051282	0.061158549	-0.017281401	20	0	14.0005	36.5008	0
1857	3.8559	178.15	122.63	3.058	-0.1728	2284	0.061160449	-0.017283601	20	0	14.0005	36.5007	0
1858	3.856	178.37	122.65	3.0582	-0.1728	2286.74359	0.061164199	-0.017281401	20	0	14.0005	36.5004	0
1859	3.8561	178.56	122.672	3.0582	-0.1728	2289.25641	0.061164199	-0.017276601	20	0	13.9993	36.5003	0
1860	3.8562	178.79	122.694	3.0584	-0.1728	2292.205128	0.061167949	-0.017279001	20	0	14.0009	36.5003	0
1861	3.8563	179.04	122.717	3.0585	-0.1726	2295.358974	0.061169849	-0.017257601	20	0	13.9993	36.5003	0
1862	3.8564	179.25	122.741	3.0588	-0.1726	2298.102564	0.061175499	-0.017263201	20	0	14.0001	36.5003	0
1863	3.8565	179.48	122.764	3.0588	-0.1726	2301.051282	0.061176149	-0.017261601	20	0	13.9989	36.5003	0
1864	3.8565	179.74	122.79	3.059	-0.1728	2304.410256	0.061179899	-0.017275801	20	0	13.9997	36.5004	0
1865	3.8566	180.01	122.816	3.059	-0.1729	2307.794872	0.061180549	-0.017286001	20	0	13.9997	36.5005	0
1866	3.8567	180.24	122.841	3.0593	-0.1727	2310.74359	0.061186849	-0.017268801	20	0	14.0005	36.5005	0
1867	3.8568	180.5	122.869	3.0594	-0.1726	2314.102564	0.061188699	-0.017262401	20	0	14.0009	36.5005	0
1868	3.8569	180.75	122.895	3.0596	-0.1727	2317.25641	0.061191849	-0.017272601	20	0	14.0001	36.5005	0
1869	3.857	181.04	122.925	3.0599	-0.1726	2321.051282	0.061198149	-0.017263201	20	0	14.0005	36.5004	0
1870	3.8571	181.32	122.956	3.0601	-0.1725	2324.641026	0.061201299	-0.017254601	20	0	14.0001	36.5	0
1871	3.8571	181.6	122.984	3.0602	-0.1722	2328.230769	0.061203199	-0.017224601	20	0	13.9997	36.4995	0
1872	3.8572	181.91	123.016	3.0605	-0.1724	2332.230769	0.061209449	-0.017235601	20	0	14.0005	36.4994	0
1873	3.8573	182.19	123.05	3.0607	-0.1723	2335.794872	0.061214499	-0.017227001	20	0	14.0005	36.4992	0
1874	3.8574	182.5	123.081	3.0609	-0.1723	2339.794872	0.061218899	-0.017228601	20	0	14.0005	36.4992	0
1875	3.8575	182.8	123.114	3.0612	-0.1726	2343.589744	0.061224549	-0.017256001	20	0	14.0001	36.4992	0
1876	3.8576	183.13	123.15	3.0614	-0.1726	2347.794872	0.061228949	-0.017256801	20	0	14.0005	36.4991	0
1877	3.8577	183.46	123.186	3.0618	-0.1724	2352.025641	0.061235249	-0.017242001	20	0	14.0001	36.499	0
1878	3.8578	183.79	123.224	3.0621	-0.1722	2356.230769	0.061242799	-0.017216001	20	0	14.0005	36.499	0
1879	3.8578	184.1	123.261	3.0624	-0.1723	2360.230769	0.061248449	-0.017233201	20	0	13.9997	36.499	0
1880	3.8579	184.48	123.302	3.0629	-0.1721	2365.076923	0.061258499	-0.017214401	20	0	14.0005	36.499	0
1881	3.858	184.77	123.342	3.0632	-0.1722	2368.871795	0.061263549	-0.017223801	20	0	14.0001	36.4991	0
1882	3.8581	185.17	123.387	3.0637	-0.1722	2373.923077	0.061274199	-0.017222201	20	0	14.0005	36.499	0
1883	3.8582	185.49	123.433	3.0642	-0.1718	2378.128205	0.061283649	-0.017176601	20	0	14.0009	36.4989	0
1884	3.8583	185.82	123.479	3.0647	-0.1722	2382.333333	0.061294949	-0.017219801	20	0	14.0001	36.4989	0
1885	3.8585	186.53	123.594	3.0664	-0.1719	2391.384615	0.061328899	-0.017194601	20	0	14.0001	36.4989	0
1886	3.8585	186.87	123.654	3.0674	-0.1714	2395.820513	0.061348399	-0.017142601	20	0	14.0005	36.499	0
1887	3.8586	187.25	123.723	3.0686	-0.1713	2400.666667	0.061372299	-0.017130801	20	0	14.0001	36.499	0
1888	3.8587	187.6	123.79	3.0699	-0.1713	2405.076923	0.061398049	-0.017128401	20	0	14.0005	36.4989	0
1889	3.8588	188.02	123.862	3.0711	-0.1711	2410.564103	0.061421949	-0.017106401	20	0	14.0001	36.4989	0
1890	3.8589	188.43	123.936	3.0724	-0.1712	2415.820513	0.061448349	-0.017119001	20	0	14.0005	36.4986	0
1891	3.8591	189.24	124.085	3.0751	-0.1706	2426.128205	0.061501799	-0.017058401	20	0	14.0005	36.4984	0
1892	3.8591	189.67	124.163	3.0765	-0.1704	2431.615385	0.061530749	-0.017037801	20	0	14.0009	36.4982	0
1893	3.8592	190.09	124.238	3.0779	-0.1702	2437.102564	0.061558399	-0.017018201	20	0	14.0001	36.4981	0
1894	3.8593	190.49	124.318	3.0793	-0.17	2442.153846	0.061586699	-0.017000801	20	0	14.0005	36.4979	0
1895	3.8594	190.91	124.395	3.0807	-0.1699	2447.615385	0.061614349	-0.016991401	20	0	14.0001	36.4979	0
1896	3.8595	191.37	124.478	3.0823	-0.1699	2453.512821	0.061645149	-0.016991401	20	0	14.0005	36.4979	0
1897	3.8596	191.83	124.563	3.0837	-0.1697	2459.410256	0.061674699	-0.016967801	20	0	14.0001	36.4979	0
1898	3.8597	192.26	124.642	3.0852	-0.1694	2464.897436	0.061704849	-0.016944201	20	0	14.0009	36.4978	0
1899	3.8598	192.72	124.728	3.0868	-0.1692	2470.794872	0.061736299	-0.016922801	20	0	14.0001	36.4975	0
1900	3.8598	193.18	124.814	3.0884	-0.1691	2476.692308	0.061768349	-0.016905601	20	0	14.0001	36.4974	0
1901	3.8599	193.64	124.897	3.0899	-0.1687	2482.589744	0.061798549	-0.016870801	20	0	13.9997	36.4974	0
1902	3.86	194.13	124.986	3.0915	-0.1686	2488.897436	0.061829999	-0.016859801	20	0	14.0005	36.4974	0
1903	3.8601	194.61	125.077	3.0931	-0.1684	2495	0.061862649	-0.016835401	20	0	13.9997	36.4976	0
1904	3.8602	195.05	125.162	3.0948	-0.168	2500.692308	0.061895999	-0.016796801	20	0	14.0001	36.4976	0
1905	3.8603	195.53	125.254	3.0965	-0.1677	2506.794872	0.061929949	-0.016767601	20	0	14.0005	36.4976	0
1906	3.8604	196.02	125.341	3.0982	-0.1675	2513.102564	0.061963899	-0.016745601	20	0	14.0009	36.4976	0
1907	3.8604	196.52	125.434	3.0999	-0.1673	2519.435897	0.061997199	-0.016733001	20	0	14.0001	36.4975	0
1908	3.8605	197.04	125.53	3.1016	-0.1669	2526.179487	0.062032399	-0.016693601	20	0	14.0001	36.4973	0
1909	3.8606	197.52	125.619	3.1033	-0.1667	2532.282051	0.062066999	-0.016666801	20	0	14.0001	36.4971	0
1910	3.8607	198.03	125.716	3.1051	-0.1663	2538.794872	0.062102849	-0.016634601	20	0	14.0005	36.4969	0
1911	3.8608	198.52	125.808	3.1069	-0.1661	2545.128205	0.062138049	-0.016614001	20	0	14.0005	36.4967	0
1912	3.8609	199.05	125.907	3.1088	-0.1662	2551.871795	0.062175749	-0.016621201	20	0	14.0009	36.4964	0
1913	3.861	199.59	126.006	3.1107	-0.1657	2558.820513	0.062213499	-0.016567601	20	0	13.9993	36.4962	0
1914	3.8611	200.08	126.1	3.1125	-0.1654	2565.128205	0.062249299	-0.016543201	20	0	14.0001	36.4961	0
1915	3.8611	200.64	126.202	3.1144	-0.1651	2572.282051	0.062287049	-0.016508601	20	0	13.9997	36.4959	0
1916	3.8612	201.18	126.305	3.1163	-0.1647	2579.230769	0.062325999	-0.016474601	20	0	14.0005	36.4957	0
1917	3.8613	201.69	126.401	3.1182	-0.1644	2585.769231	0.062363749	-0.016442401	20	0	14.0005	36.4955	0
1918	3.8614	202.26	126.506	3.1203	-0.1641	2593.128205	0.062405249	-0.016413201	20	0	14.0001	36.4952	0
1919	3.8615	202.77	126.604	3.1221	-0.1638	2599.666667	0.062441699	-0.016379401	20	0	14.0009	36.4951	0
1920	3.8616	203.35	126.71	3.1242	-0.1635	2607.025641	0.062483799	-0.016351001	20	0	14.0001	36.495	0
1921	3.8617	203.91	126.816	3.1262	-0.1631	2614.205128	0.062523399	-0.016312401	20	0	14.0005	36.4949	0
1922	3.8617	204.43	126.917	3.1282	-0.1628	2620.923077	0.062564299	-0.016275401	20	0	14.0001	36.4948	0
1923	3.8618	205.01	127.026	3.1303	-0.1624	2628.307692	0.062605149	-0.016242201	20	0	14.0009	36.4945	0
1924	3.8619	205.58	127.135	3.1325	-0.162	2635.666667	0.062649149	-0.016202801	20	0	14.0005	36.4944	0
1925	3.862	206.16	127.238	3.1343	-0.1617	2643.051282	0.062686899	-0.016169001	20	0	14.0001	36.4944	0
1926	3.8621	206.72	127.35	3.1365	-0.1615	2650.205128	0.062729649	-0.016150201	20	0	14.0005	36.4944	0
1927	3.8622	207.26	127.455	3.1386	-0.161	2657.153846	0.062772399	-0.016099601	20	0	14.0009	36.4943	0
1928	3.8623	207.87	127.568	3.1406	-0.1608	2664.948718	0.062812599	-0.016081601	20	0	14.0009	36.494	0
1929	3.8624	208.49	127.68	3.143	-0.1604	2672.948718	0.062859749	-0.016042201	20	0	14.0001	36.4938	0
1930	3.8624	209.05	127.787	3.145	-0.16	2680.102564	0.062899999	-0.015997201	20	0	13.9997	36.4938	0
1931	3.8625	209.64	127.902	3.1473	-0.1595	2687.692308	0.062946549	-0.015945401	20	0	14.0005	36.4938	0
1932	3.8626	210.23	128.017	3.1495	-0.1591	2695.25641	0.062989899	-0.015911401	20	0	14.0001	36.4938	0
1933	3.8627	210.82	128.125	3.1516	-0.1587	2702.846154	0.063032649	-0.015869601	20	0	14.0009	36.4937	0
1934	3.8628	211.41	128.243	3.154	-0.1582	2710.435897	0.063079799	-0.015824001	20	0	14.0005	36.4935	0
1935	3.8629	212	128.353	3.156	-0.1579	2718	0.063120649	-0.015787801	20	0	14.0005	36.4933	0
1936	3.863	212.65	128.471	3.1584	-0.1574	2726.230769	0.063167199	-0.015738201	20	0	13.9997	36.4933	0
1937	3.8631	213.29	128.589	3.1606	-0.157	2734.435897	0.063211849	-0.015697201	20	0	14.0009	36.4932	0
1938	3.8631	213.84	128.701	3.1628	-0.1566	2741.589744	0.063255849	-0.015661801	20	0	14.0005	36.4929	0
1939	3.8632	214.49	128.822	3.1653	-0.1562	2749.820513	0.063306149	-0.015620001	20	0	14.0005	36.4926	0
1940	3.8633	215.13	128.942	3.1676	-0.1556	2758.025641	0.063351399	-0.015564001	20	0	14.0005	36.4923	0
1941	3.8634	215.72	129.056	3.1699	-0.1551	2765.615385	0.063397899	-0.015507401	20	0	14.0001	36.4922	0
1942	3.8635	216.37	129.177	3.1723	-0.1549	2774.025641	0.063446949	-0.015486001	20	0	14.0005	36.4922	0
1943	3.8636	217.01	129.3	3.1748	-0.1543	2782.230769	0.063495349	-0.015431601	20	0	14.0005	36.4922	0
1944	3.8637	217.61	129.415	3.1771	-0.1538	2789.820513	0.063542499	-0.015380401	19.99	0	14.0001	36.4921	0
1945	3.8637	218.26	129.539	3.1797	-0.1532	2798.230769	0.063594699	-0.015321401	20	0	14.0009	36.4921	0
1946	3.8638	218.87	129.655	3.1821	-0.1529	2806.025641	0.063641249	-0.015294601	20	0	14.0005	36.4918	0
1947	3.8639	219.51	129.78	3.1845	-0.1526	2814.25641	0.063690899	-0.015255201	20	0	13.9997	36.4916	0
1948	3.864	220.2	129.906	3.1871	-0.1519	2823.102564	0.063742449	-0.015186801	20	0	14.0001	36.4916	0
1949	3.8641	220.78	130.024	3.1895	-0.1514	2830.461538	0.063790199	-0.015143401	20	0	14.0001	36.4917	0
1950	3.8642	221.45	130.15	3.1922	-0.1508	2839.102564	0.063843649	-0.015082801	20	0	14.0001	36.4916	0
1951	3.8643	222.14	130.277	3.1948	-0.1504	2847.948718	0.063896449	-0.015037801	20	0	14.0001	36.4916	0
1952	3.8644	222.71	130.396	3.1972	-0.1498	2855.307692	0.063944899	-0.014977201	20	0	14.0001	36.4915	0
1953	3.8644	223.42	130.525	3.1999	-0.1493	2864.358974	0.063998949	-0.014927601	20	0	13.9997	36.4914	0
1954	3.8645	224.03	130.645	3.2024	-0.1489	2872.153846	0.064048599	-0.014894401	20	0	13.9997	36.4914	0
1955	3.8646	224.72	130.774	3.2052	-0.1482	2881	0.064103299	-0.014818801	20	0	14.0005	36.4915	0
1956	3.8647	225.38	130.902	3.2077	-0.1478	2889.435897	0.064154849	-0.014779401	20	0	14.0005	36.4914	0
1957	3.8648	226.02	131.023	3.2103	-0.1472	2897.641026	0.064206399	-0.014715601	20	0	14.0001	36.4913	0
1958	3.8649	226.71	131.154	3.213	-0.1467	2906.487179	0.064259849	-0.014666001	20	0	14.0009	36.4911	0
1959	3.865	227.38	131.284	3.2158	-0.1463	2915.128205	0.064315199	-0.014631401	20	0	14.0005	36.4908	0
1960	3.865	228.04	131.407	3.2183	-0.1455	2923.538462	0.064366099	-0.014552601	20	0	13.9993	36.4908	0
1961	3.8651	228.71	131.538	3.2209	-0.1452	2932.179487	0.064418899	-0.014523401	20	0	13.9997	36.4909	0
1962	3.8652	229.35	131.661	3.2236	-0.1444	2940.384615	0.064472999	-0.014443001	20	0	13.9997	36.4911	0
1963	3.8653	230.02	131.792	3.2263	-0.144	2949.025641	0.064525799	-0.014395001	20	0	13.9993	36.4914	0
1964	3.8654	230.71	131.924	3.229	-0.1433	2957.871795	0.064579199	-0.014334401	20	0	13.9997	36.4918	0
1965	3.8655	231.37	132.048	3.2316	-0.1428	2966.282051	0.064632649	-0.014275201	20	0	13.9993	36.4922	0
1966	3.8656	232.04	132.181	3.2343	-0.1422	2974.923077	0.064685449	-0.014224001	20	0	14.0005	36.4923	0
1967	3.8657	232.73	132.315	3.2371	-0.1419	2983.769231	0.064742049	-0.014191001	20	0	14.0009	36.4926	0
1968	3.8657	233.39	132.44	3.2397	-0.1411	2992.179487	0.064794249	-0.014107601	20	0	14.0009	36.4926	0
1969	3.8658	234.1	132.573	3.2425	-0.1405	3001.25641	0.064850199	-0.014048401	20	0	14.0005	36.4926	0
1970	3.8659	234.75	132.699	3.2452	-0.1399	3009.666667	0.064903649	-0.013994001	20	0	14.0005	36.4926	0
1971	3.866	235.43	132.833	3.2482	-0.1393	3018.307692	0.064963349	-0.013931801	20	0	14.0005	36.4925	0
1972	3.8661	236.13	132.968	3.2509	-0.1386	3027.358974	0.065017399	-0.013864801	20	0	14.0009	36.4925	0
1973	3.8662	236.79	133.095	3.2535	-0.1382	3035.794872	0.065070849	-0.013821601	20	0	14.0001	36.4924	0
1974	3.8663	237.48	133.23	3.2566	-0.1375	3044.615385	0.065131849	-0.013753801	20	0	14.0009	36.4922	0
1975	3.8663	238.15	133.357	3.2592	-0.137	3053.25641	0.065183999	-0.013701001	20	0	14.0009	36.4918	0
1976	3.8664	238.83	133.492	3.262	-0.1364	3061.897436	0.065240599	-0.013644401	20	0	14.0013	36.4913	0
1977	3.8665	239.55	133.628	3.2649	-0.1359	3071.153846	0.065298449	-0.013590801	20	0	14.0009	36.4907	0
1978	3.8666	240.21	133.756	3.2678	-0.1353	3079.589744	0.065356299	-0.013525401	20	0	14.0005	36.4902	0
1979	3.8667	240.9	133.891	3.2706	-0.1344	3088.435897	0.065412249	-0.013441801	20	0	14.0001	36.49	0
1980	3.8668	241.59	134.026	3.2736	-0.1342	3097.282051	0.065472599	-0.013415801	20	0	14.0001	36.49	0
1981	3.8669	242.28	134.154	3.2764	-0.1334	3106.128205	0.065528549	-0.013335601	20	0	13.9997	36.4901	0
1982	3.867	242.95	134.29	3.2795	-0.1329	3114.74359	0.065589499	-0.013285201	20	0	13.9997	36.4903	0
1983	3.867	243.62	134.418	3.2821	-0.1323	3123.384615	0.065642949	-0.013232401	20	0	14.0001	36.4906	0
1984	3.8671	244.33	134.554	3.2851	-0.1315	3132.435897	0.065701449	-0.013153601	20	0	13.9997	36.4908	0
1985	3.8672	245.02	134.688	3.2881	-0.1309	3141.282051	0.065762399	-0.013093601	20	0	14.0005	36.4909	0
1986	3.8673	245.68	134.814	3.2908	-0.1304	3149.717949	0.065816499	-0.013035401	20	0	14.0005	36.491	0
1987	3.8674	246.37	134.95	3.2937	-0.1296	3158.564103	0.065874949	-0.012964401	20	0	14.0001	36.4909	0
1988	3.8675	247.09	135.086	3.2967	-0.1291	3167.820513	0.065934049	-0.012911001	20	0	13.9997	36.4908	0
1989	3.8676	247.73	135.214	3.2995	-0.1284	3176.025641	0.065989999	-0.012841601	20	0	14.0005	36.4907	0
1990	3.8677	248.44	135.35	3.3025	-0.1281	3185.076923	0.066049099	-0.012810201	20	0	14.0005	36.4905	0
1991	3.8677	249.09	135.477	3.3052	-0.1273	3193.512821	0.066103149	-0.012734401	20	0	14.0009	36.4902	0
1992	3.8678	249.82	135.613	3.3082	-0.1267	3202.769231	0.066164749	-0.012667601	20	0	14.0009	36.4899	0
1993	3.8679	250.51	135.75	3.3113	-0.1261	3211.615385	0.066225099	-0.012605201	20	0	14.0005	36.4894	0
1994	3.868	251.18	135.878	3.3141	-0.1254	3220.25641	0.066281699	-0.012542201	20	0	13.9993	36.4893	0
[truncated: 7,124 more rows]
