# Supplementary material for: An experimental study of deformation and fracture characteristics of shale with pore-water pressure and under triaxial cyclic loading
Source: R Soc Open Sci. 2018 Aug 22;5(8):180670. doi: 10.1098/rsos.180670 (PMC6124076; doi:10.1098/rsos.180670)
Supplement: The original data of the experiments under pore-water pressure of 6MPa [file rsos180670supp2.csv]

C:\Documents and Settings\Administrator\windows\zhou16.csv
2017/8/16	20:05:01
���.10
diameter:50mm	Standard distance :100mm
���.	time	fload	displacement	deformation1	deformation2	stress	strain1	strain2	confining pressure	displacement2	water-pressure	discharge	temperature
	h	kN	mm	mm	mm	MPa
1	0.0017	0.12	-1.72	1.3292	-0.4321	1.487179487	0.026583099	-0.043205602	0.59	0	0.0006	-13.9052	0
2	0.0063	0	-1.72	1.3294	-0.4328	-4.27E-15	0.026588149	-0.043278202	0.59	0	0.001	-13.9052	0
3	0.0263	0.1	0.087	1.331	-0.4359	1.282051282	0.026619649	-0.043592802	0.62	0	0.0002	-13.9052	0
4	0.0277	0.21	0.91	1.3313	-0.4363	2.743589744	0.026626549	-0.043629002	0.64	0	0.0006	-13.9052	0
5	0.0353	0.33	5.456	1.334	-0.4382	4.230769231	0.026680749	-0.043822802	0.74	0	-0.0002	-13.9052	0
6	0.0366	0.44	6.22	1.3344	-0.4385	5.692307692	0.026688899	-0.043850402	0.76	0	0.0002	-13.9052	0
7	0.0373	0.54	6.69	1.3347	-0.4387	6.974358974	0.026693949	-0.043865402	0.77	0	0.0006	-13.9052	0
8	0.0381	0.66	7.157	1.3351	-0.4388	8.435897436	0.026702149	-0.043880402	0.78	0	0.0002	-13.9052	0
9	0.0389	0.77	7.65	1.3357	-0.4389	9.923076923	0.026714749	-0.043894602	0.79	0	0.0002	-13.9052	0
10	0.0397	0.89	8.103	1.3365	-0.4391	11.38461538	0.026729849	-0.043911202	0.81	0	0.0002	-13.9052	0
11	0.0404	1	8.547	1.3373	-0.4392	12.87179487	0.026745599	-0.043923002	0.82	0	0.0002	-13.9052	0
12	0.0412	1.12	8.977	1.3382	-0.4393	14.33333333	0.026763249	-0.043926202	0.83	0	-0.0002	-13.9052	0
13	0.0417	1.22	9.32	1.3389	-0.4395	15.61538462	0.026777699	-0.043949002	0.84	0	-0.0002	-13.9052	0
14	0.0424	1.33	9.743	1.3398	-0.4396	17.07692308	0.026795999	-0.043960802	0.85	0	0.0002	-13.9052	0
15	0.0432	1.45	10.177	1.3408	-0.4397	18.56410256	0.026816149	-0.043973402	0.87	0	0.0002	-13.9052	0
16	0.0437	1.56	10.533	1.3417	-0.4398	20.02564103	0.026833749	-0.043982002	0.88	0	0.0002	-13.9052	0
17	0.0443	1.68	10.84	1.3423	-0.4399	21.51282051	0.026846349	-0.043990002	0.89	0	0.0006	-13.9052	0
18	0.045	1.81	11.206	1.3435	-0.44	23.17948718	0.026869049	-0.044000202	0.9	0	0.0006	-13.9052	0
19	0.0457	1.91	11.443	1.3442	-0.4402	24.46153846	0.026884149	-0.044016002	0.92	0	0.0002	-13.9052	0
20	0.0503	2.02	11.807	1.3466	-0.4413	25.92307692	0.026931399	-0.044134202	1	0	0.0006	-13.9052	0
21	0.0529	2.14	12.479	1.3475	-0.4419	27.41025641	0.026950299	-0.044188602	1.03	0	0.0002	-13.9052	0
22	0.0536	2.25	12.943	1.3485	-0.4421	28.87179487	0.026970449	-0.044206002	1.05	0	0.0002	-13.9052	0
23	0.0541	2.35	13.216	1.349	-0.4421	30.15384615	0.026980499	-0.044213802	1.06	0	-0.0006	-13.9052	0
24	0.0547	2.47	13.566	1.3499	-0.4422	31.61538462	0.026998149	-0.044224002	1.08	0	-0.0002	-13.9052	0
25	0.0552	2.58	13.893	1.3506	-0.4423	33.1025641	0.027011999	-0.044232802	1.09	0	0.001	-13.9052	0
26	0.0558	2.7	14.219	1.3515	-0.4424	34.56410256	0.027029649	-0.044240602	1.11	0	0.001	-13.9052	0
27	0.0562	2.81	14.499	1.3522	-0.4425	36.05128205	0.027044099	-0.044250002	1.12	0	0.001	-13.9052	0
28	0.0567	2.93	14.793	1.3528	-0.4426	37.51282051	0.027056699	-0.044259602	1.14	0	0.0002	-13.9052	0
29	0.0571	3.04	15.033	1.3535	-0.4427	39	0.027069299	-0.044265002	1.15	0	0.0002	-13.9052	0
30	0.0577	3.16	15.386	1.3543	-0.4428	40.46153846	0.027086299	-0.044276002	1.17	0	-0.0002	-13.9052	0
31	0.0581	3.26	15.609	1.3548	-0.4428	41.74358974	0.027096399	-0.044280002	1.18	0	0.0002	-13.9052	0
32	0.0586	3.37	15.893	1.3557	-0.4429	43.20512821	0.027113399	-0.044289402	1.19	0	-0.0006	-13.9052	0
33	0.059	3.49	16.143	1.3562	-0.4429	44.69230769	0.027124749	-0.044294202	1.21	0	0.0002	-13.9052	0
34	0.0595	3.6	16.443	1.357	-0.443	46.15384615	0.027140499	-0.044300602	1.22	0	-0.0002	-13.9052	0
35	0.0599	3.72	16.693	1.3577	-0.4431	47.64102564	0.027154349	-0.044308402	1.24	0	0.0006	-13.9052	0
36	0.0604	3.83	16.894	1.3584	-0.4431	49.1025641	0.027168199	-0.044314802	1.26	0	0.001	-13.9052	0
37	0.0615	3.95	17.136	1.3595	-0.4434	50.58974359	0.027190849	-0.044344602	1.3	0	0.001	-13.9052	0
38	0.0833	4.06	18.665	1.3707	-0.4499	52.05128205	0.027414449	-0.044991002	2.02	0	-0.0002	-13.9052	0
39	0.0838	4.18	19.077	1.3712	-0.45	53.53846154	0.027424499	-0.045004402	2.07	0	-0.0002	-13.9052	0
40	0.0841	4.29	19.482	1.372	-0.4502	55	0.027439649	-0.045016202	2.12	0	-0.0002	-13.9052	0
41	0.0843	4.41	19.789	1.3727	-0.4502	56.48717949	0.027453499	-0.045024202	2.16	0	-0.0002	-13.9052	0
42	0.0845	4.52	20.031	1.3732	-0.4503	57.94871795	0.027464199	-0.045033602	2.2	0	-0.0002	-13.9052	0
43	0.0847	4.62	20.29	1.3739	-0.4504	59.23076923	0.027478049	-0.045040602	2.24	0	-0.0006	-13.9052	0
44	0.0849	4.73	20.57	1.3746	-0.4505	60.69230769	0.027492549	-0.045046202	2.28	0	-0.0002	-13.9052	0
45	0.085	4.85	20.794	1.3753	-0.4506	62.17948718	0.027506399	-0.045057202	2.32	0	-0.0002	-13.9052	0
46	0.0852	4.96	21.019	1.3759	-0.4506	63.64102564	0.027518349	-0.045064402	2.36	0	0.0002	-13.9052	0
47	0.0853	5.08	21.26	1.3766	-0.4507	65.12820513	0.027532849	-0.045071402	2.41	0	-0.0002	-13.9052	0
48	0.0855	5.21	21.498	1.3775	-0.4508	66.79487179	0.027549199	-0.045081602	2.45	0	0.0002	-13.9052	0
49	0.0856	5.33	21.7	1.3782	-0.4509	68.28205128	0.027563099	-0.045091202	2.5	0	0.0002	-13.9052	0
50	0.0858	5.44	21.917	1.3788	-0.451	69.74358974	0.027575649	-0.045100602	2.55	0	-0.0002	-13.9052	0
51	0.0859	5.54	22.131	1.3796	-0.4511	71.02564103	0.027592049	-0.045110002	2.59	0	-0.0002	-13.9052	0
52	0.0861	5.65	22.335	1.3803	-0.4512	72.48717949	0.027605899	-0.045121002	2.64	0	0.0002	-13.9052	0
53	0.0862	5.77	22.554	1.3811	-0.4514	73.97435897	0.027622899	-0.045135202	2.69	0	-0.0002	-13.9052	0
54	0.0864	5.88	22.763	1.382	-0.4515	75.43589744	0.027640549	-0.045145602	2.75	0	0.0002	-13.9052	0
55	0.0865	6	22.955	1.3828	-0.4516	76.92307692	0.027656299	-0.045157402	2.8	0	-0.0002	-13.9052	0
56	0.0867	6.11	23.161	1.3838	-0.4517	78.38461538	0.027676449	-0.045169202	2.85	0	-0.0002	-13.9052	0
57	0.0868	6.23	23.364	1.3846	-0.4518	79.87179487	0.027691549	-0.045181802	2.91	0	0.0002	-13.9052	0
58	0.087	6.34	23.564	1.3855	-0.452	81.33333333	0.027709199	-0.045195202	2.97	0	0.0006	-13.9052	0
59	0.0871	6.44	23.709	1.3862	-0.4521	82.61538462	0.027723049	-0.045207002	3.01	0	0.0002	-13.9052	0
60	0.0872	6.57	23.896	1.387	-0.4522	84.28205128	0.027740049	-0.045220402	3.07	0	-0.0002	-13.9052	0
61	0.0874	6.69	24.137	1.3882	-0.4524	85.76923077	0.027764599	-0.045237002	3.15	0	0.0006	-13.9052	0
62	0.0875	6.81	24.305	1.3891	-0.4525	87.25641026	0.027781599	-0.045254202	3.2	0	-0.0002	-13.9052	0
63	0.0877	6.94	24.498	1.39	-0.4527	88.92307692	0.027800499	-0.045268402	3.27	0	0.0002	-13.9052	0
64	0.0879	7.07	24.717	1.3912	-0.4528	90.61538462	0.027823199	-0.045281002	3.34	0	-0.0002	-13.9052	0
65	0.088	7.2	24.912	1.3922	-0.453	92.30769231	0.027843349	-0.045297602	3.4	0	-0.0002	-13.9052	0
66	0.0882	7.31	25.084	1.3931	-0.453	93.76923077	0.027862849	-0.045296002	3.46	0	0.0002	-13.9052	0
67	0.0883	7.43	25.28	1.3941	-0.4533	95.25641026	0.027881749	-0.045331602	3.53	0	-0.0006	-13.9052	0
68	0.0885	7.56	25.448	1.3949	-0.4535	96.94871795	0.027898149	-0.045345802	3.59	0	0.0006	-13.9052	0
69	0.0887	7.68	25.659	1.3962	-0.4536	98.41025641	0.027923299	-0.045363802	3.67	0	-0.0002	-13.9052	0
70	0.0888	7.79	25.822	1.397	-0.4538	99.8974359	0.027939699	-0.045381202	3.73	0	0.0002	-13.9052	0
71	0.0889	7.91	25.971	1.3978	-0.4539	101.3589744	0.027955449	-0.045390602	3.78	0	0.0006	-13.9052	0
72	0.0891	8.02	26.136	1.3987	-0.4541	102.8461538	0.027974949	-0.045409602	3.84	0	-0.0006	-13.9052	0
73	0.0893	8.15	26.331	1.3997	-0.4543	104.5128205	0.027993249	-0.045430002	3.92	0	-0.0002	-13.9052	0
74	0.0894	8.25	26.469	1.4005	-0.4544	105.7948718	0.028010249	-0.045439602	3.97	0	-0.0006	-13.9052	0
75	0.0896	8.37	26.636	1.4015	-0.4546	107.2564103	0.028029749	-0.045459202	4.03	0	-0.001	-13.9052	0
76	0.0897	8.48	26.796	1.4023	-0.4547	108.7435897	0.028045499	-0.045472602	4.09	0	-0.001	-13.9052	0
77	0.0899	8.6	26.961	1.4031	-0.4549	110.2051282	0.028061899	-0.045487602	4.15	0	-0.0006	-13.9052	0
78	0.09	8.71	27.112	1.4039	-0.4551	111.6923077	0.028078249	-0.045505002	4.21	0	-0.0002	-13.9052	0
79	0.0902	8.84	27.302	1.4048	-0.4553	113.3846154	0.028096499	-0.045526202	4.28	0	0.0002	-13.9052	0
80	0.0904	8.96	27.492	1.4058	-0.4554	114.8461538	0.028115399	-0.045541202	4.36	0	0.0002	-13.9052	0
81	0.0905	9.07	27.648	1.4066	-0.4556	116.3333333	0.028131149	-0.045556202	4.42	0	0.0002	-13.9052	0
82	0.0907	9.19	27.798	1.4074	-0.4557	117.7948718	0.028148149	-0.045568802	4.47	0	-0.0002	-13.9052	0
83	0.0908	9.3	27.952	1.4081	-0.4558	119.2820513	0.028162649	-0.045581402	4.53	0	0.0006	-13.9052	0
84	0.091	9.42	28.122	1.4089	-0.456	120.7435897	0.028178399	-0.045599602	4.6	0	-0.0002	-13.9052	0
85	0.0911	9.55	28.279	1.4097	-0.4562	122.4358974	0.028194749	-0.045616802	4.66	0	0.0002	-13.9052	0
86	0.0914	9.66	28.425	1.4108	-0.4564	123.8974359	0.028215549	-0.045635802	4.73	0	-0.0002	-13.9052	0
87	0.0915	9.78	28.519	1.4114	-0.4565	125.3846154	0.028228749	-0.045652402	4.78	0	-0.0002	-13.9052	0
88	0.0919	9.89	28.624	1.4126	-0.4567	126.8461538	0.028252049	-0.045670402	4.85	0	-0.0002	-13.9052	0
89	0.093	10.01	28.726	1.4147	-0.4572	128.3333333	0.028294899	-0.045721802	4.95	0	0.0002	-13.9052	0
90	0.2157	10.13	29.451	1.4192	-0.459	129.8205128	0.028383049	-0.045900602	5.17	0	-0.0002	-13.9052	0
91	0.216	10.27	29.674	1.4197	-0.4592	131.6923077	0.028393799	-0.045918802	5.24	0	-0.0002	-13.9052	0
92	0.2162	10.44	29.913	1.4205	-0.4594	133.8205128	0.028409499	-0.045938402	5.32	0	0.0002	-13.9052	0
93	0.2164	10.55	30.077	1.4211	-0.4595	135.2820513	0.028421499	-0.045949402	5.38	0	0.0006	-13.9052	0
94	0.2166	10.68	30.241	1.4216	-0.4596	136.974359	0.028432849	-0.045962202	5.43	0	-0.0002	-13.9052	0
95	0.2168	10.86	30.49	1.4225	-0.4598	139.2820513	0.028449199	-0.045981002	5.52	0	-0.0006	-13.9052	0
96	0.217	11	30.657	1.4231	-0.4599	140.974359	0.028461799	-0.045994402	5.58	0	0.0002	-13.9052	0
97	0.2173	11.21	30.893	1.424	-0.4602	143.7179487	0.028480699	-0.046015802	5.67	0	-0.0002	-13.9052	0
98	0.2174	11.32	31.054	1.4247	-0.4603	145.1794872	0.028494549	-0.046027602	5.73	0	-0.0002	-13.9052	0
99	0.2176	11.46	31.209	1.4253	-0.4604	146.8717949	0.028505249	-0.046038602	5.79	0	-0.0002	-13.9052	0
100	0.2178	11.6	31.361	1.4259	-0.4606	148.7692308	0.028518499	-0.046056002	5.86	0	-0.0002	-13.9052	0
101	0.218	11.72	31.517	1.4264	-0.4606	150.2564103	0.028528549	-0.046061402	5.92	0	-0.0002	-13.9052	0
102	0.2181	11.83	31.666	1.4272	-0.4608	151.7179487	0.028544949	-0.046083402	5.98	0	-0.0002	-13.9052	0
103	0.2183	11.97	31.815	1.4278	-0.461	153.4102564	0.028556249	-0.046096802	6.04	0	0.0002	-13.9052	0
104	0.2185	12.1	31.964	1.4283	-0.4611	155.1025641	0.028566949	-0.046112602	6.11	0	-0.0002	-13.9052	0
105	0.2187	12.21	32.111	1.4291	-0.4612	156.5641026	0.028581449	-0.046124402	6.17	0	0.0002	-13.9052	0
106	0.2188	12.36	32.26	1.4297	-0.4614	158.4615385	0.028594699	-0.046137802	6.24	0	0.0002	-13.9052	0
107	0.219	12.51	32.404	1.4303	-0.4615	160.3589744	0.028606649	-0.046153602	6.3	0	0.0002	-13.9052	0
108	0.2193	12.67	32.622	1.4313	-0.4618	162.4615385	0.028625549	-0.046176602	6.4	0	-0.0006	-13.9052	0
109	0.2194	12.8	32.765	1.432	-0.4619	164.1538462	0.028639399	-0.046190002	6.46	0	0.0002	-13.9052	0
110	0.2196	12.94	32.906	1.4325	-0.462	165.8461538	0.028650749	-0.046204802	6.53	0	-0.0002	-13.9052	0
111	0.2198	13.08	33.052	1.4333	-0.4622	167.7435897	0.028665199	-0.046218202	6.59	0	-0.0006	-13.9052	0
112	0.22	13.2	33.191	1.4339	-0.4623	169.2051282	0.028677199	-0.046232402	6.65	0	-0.0002	-13.9052	0
113	0.2201	13.35	33.329	1.4344	-0.4625	171.1025641	0.028687899	-0.046247402	6.72	0	0.0002	-13.9052	0
114	0.2204	13.53	33.536	1.4353	-0.4627	173.4358974	0.028706149	-0.046265602	6.81	0	0.0002	-13.9052	0
115	0.2206	13.64	33.672	1.436	-0.4629	174.8974359	0.028720649	-0.046285202	6.88	0	0.0002	-13.9052	0
116	0.2207	13.76	33.807	1.4367	-0.463	176.3846154	0.028733849	-0.046299402	6.94	0	0.0002	-13.9052	0
117	0.2209	13.89	33.944	1.4372	-0.4632	178.0512821	0.028744599	-0.046315202	7	0	0.0002	-13.9052	0
118	0.2211	14.04	34.076	1.4379	-0.4633	179.9487179	0.028757149	-0.046326202	7.06	0	-0.0002	-13.9052	0
119	0.2213	14.15	34.208	1.4385	-0.4634	181.4358974	0.028769749	-0.046344402	7.13	0	-0.0002	-13.9052	0
120	0.2214	14.3	34.338	1.4391	-0.4636	183.3333333	0.028781099	-0.046357802	7.19	0	-0.0002	-13.9052	0
121	0.2216	14.43	34.473	1.4397	-0.4637	185.025641	0.028794949	-0.046366402	7.26	0	0.0002	-13.9052	0
122	0.2219	14.61	34.666	1.4407	-0.4639	187.3333333	0.028813849	-0.046391602	7.35	0	0.0002	-13.9052	0
123	0.2221	14.79	34.863	1.4416	-0.4641	189.6410256	0.028832749	-0.046408202	7.45	0	0.0002	-13.9052	0
124	0.2224	14.97	35.059	1.4425	-0.4644	191.974359	0.028850399	-0.046435002	7.54	0	0.0002	-13.9052	0
125	0.2226	15.1	35.193	1.4431	-0.4645	193.6410256	0.028862999	-0.046446802	7.6	0	0.0002	-13.9052	0
126	0.2227	15.22	35.321	1.4438	-0.4646	195.1282051	0.028875549	-0.046461002	7.67	0	0.0002	-13.9052	0
127	0.2229	15.37	35.446	1.4443	-0.4648	197.025641	0.028886899	-0.046475202	7.73	0	0.0002	-13.9052	0
128	0.2231	15.48	35.571	1.4449	-0.4649	198.4871795	0.028898899	-0.046488602	7.79	0	-0.0006	-13.9052	0
129	0.2233	15.6	35.697	1.4455	-0.465	199.974359	0.028910849	-0.046503602	7.86	0	-0.0006	-13.9052	0
130	0.2234	15.75	35.827	1.4462	-0.4652	201.8717949	0.028924699	-0.046520202	7.92	0	0.0002	-13.9052	0
131	0.2236	15.88	35.952	1.4469	-0.4653	203.5641026	0.028937299	-0.046530402	7.98	0	0.0002	-13.9052	0
132	0.2238	16.01	36.077	1.4473	-0.4654	205.2307692	0.028946749	-0.046539802	8.05	0	-0.001	-13.9052	0
133	0.224	16.12	36.205	1.4481	-0.4656	206.7179487	0.028962499	-0.046559602	8.11	0	-0.0006	-13.9052	0
134	0.2241	16.24	36.327	1.4486	-0.4657	208.1794872	0.028972549	-0.046573002	8.17	0	-0.001	-13.9052	0
135	0.2243	16.35	36.447	1.4493	-0.4659	209.6666667	0.028985799	-0.046587202	8.24	0	0.0002	-13.9052	0
136	0.2245	16.49	36.569	1.4498	-0.466	211.3589744	0.028996499	-0.046599002	8.3	0	-0.0002	-13.9052	0
137	0.2246	16.63	36.694	1.4504	-0.4661	213.2564103	0.029008449	-0.046614802	8.36	0	-0.0006	-13.9052	0
138	0.2249	16.81	36.873	1.4514	-0.4663	215.5641026	0.029028599	-0.046632802	8.46	0	-0.0002	-13.9052	0
139	0.2252	16.99	37.058	1.4523	-0.4665	217.8717949	0.029046249	-0.046651002	8.55	0	0.0006	-13.9052	0
140	0.2253	17.13	37.184	1.453	-0.4666	219.5641026	0.029060099	-0.046662802	8.62	0	-0.0006	-13.9052	0
141	0.2255	17.27	37.306	1.4536	-0.4668	221.4615385	0.029072699	-0.046678602	8.68	0	-0.0002	-13.9052	0
142	0.2258	17.44	37.489	1.4546	-0.467	223.5641026	0.029091599	-0.046703802	8.77	0	-0.0006	-13.9052	0
143	0.226	17.55	37.609	1.4551	-0.4672	225.0512821	0.029102299	-0.046723602	8.84	0	-0.0006	-13.9052	0
144	0.2261	17.69	37.73	1.4558	-0.4673	226.7435897	0.029115549	-0.046733802	8.9	0	-0.0002	-13.9052	0
145	0.2263	17.8	37.851	1.4564	-0.4675	228.2051282	0.029128749	-0.046748802	8.96	0	-0.0002	-13.9052	0
146	0.2265	17.95	37.975	1.457	-0.4676	230.1025641	0.029139449	-0.046761402	9.03	0	-0.0002	-13.9052	0
147	0.2266	18.1	38.095	1.4576	-0.4677	232	0.029151449	-0.046774002	9.09	0	-0.0006	-13.9052	0
148	0.2269	18.29	38.273	1.4585	-0.4679	234.5384615	0.029170299	-0.046787402	9.18	0	-0.0002	-13.9052	0
149	0.2272	18.46	38.45	1.4594	-0.4681	236.6410256	0.029188599	-0.046807802	9.28	0	-0.0002	-13.9052	0
150	0.2273	18.57	38.566	1.4601	-0.4682	238.1025641	0.029201799	-0.046819602	9.34	0	0.0002	-13.9052	0
151	0.2275	18.74	38.681	1.4607	-0.4684	240.2307692	0.029213799	-0.046837802	9.41	0	0.0002	-13.9052	0
152	0.2278	18.9	38.855	1.4615	-0.4686	242.3333333	0.029229499	-0.046863002	9.5	0	0.0002	-13.9052	0
153	0.2279	19.02	38.969	1.4621	-0.4688	243.7948718	0.029241499	-0.046881202	9.56	0	0.0002	-13.9052	0
154	0.2281	19.16	39.087	1.4626	-0.469	245.6923077	0.029252199	-0.046895402	9.63	0	-0.0002	-13.9052	0
155	0.2283	19.28	39.2	1.4633	-0.4691	247.1794872	0.029266049	-0.046910402	9.69	0	0.0006	-13.9052	0
156	0.2285	19.39	39.314	1.4639	-0.4692	248.6410256	0.029277399	-0.046915802	9.75	0	0.0002	-13.9052	0
157	0.2286	19.51	39.428	1.4644	-0.4693	250.1282051	0.029288699	-0.046925402	9.81	0	0.0006	-13.9052	0
158	0.2288	19.64	39.546	1.4651	-0.4695	251.8205128	0.029302599	-0.046954402	9.86	0	-0.0002	-13.9052	0
159	0.229	19.77	39.636	1.4656	-0.4695	253.4871795	0.029312649	-0.046952202	9.89	0	0.0006	-13.9052	0
160	0.2292	19.87	39.719	1.4663	-0.4696	254.7692308	0.029325249	-0.046957602	9.93	0	0.0006	-13.9052	0
161	0.2328	19.99	40.082	1.4688	-0.4703	256.2307692	0.029375649	-0.047031802	10.04	0	-0.0002	-13.9052	0
162	0.2332	20.12	40.234	1.469	-0.4706	257.9230769	0.029380049	-0.047060202	10.13	0	-0.0002	-13.9052	0
163	0.2334	20.3	40.383	1.4696	-0.4707	260.2307692	0.029391399	-0.047069602	10.2	0	0.0002	-13.9052	0
164	0.2336	20.43	40.487	1.4701	-0.4707	261.9230769	0.029401449	-0.047073602	10.26	0	0.0002	-13.9052	0
165	0.2339	20.58	40.647	1.4708	-0.471	263.8205128	0.029415949	-0.047100402	10.34	0	0.0006	-13.9052	0
166	0.234	20.71	40.753	1.4714	-0.471	265.5128205	0.029427299	-0.047100402	10.4	0	0.0006	-13.9052	0
167	0.2342	20.84	40.859	1.4717	-0.4712	267.1794872	0.029434199	-0.047120802	10.46	0	0.001	-13.9052	0
168	0.2344	20.96	40.965	1.4723	-0.4713	268.6666667	0.029445549	-0.047132602	10.52	0	0.0002	-13.9052	0
169	0.2345	21.09	41.073	1.4728	-0.4715	270.3589744	0.029456249	-0.047145202	10.58	0	0.0002	-13.9052	0
170	0.2347	21.2	41.177	1.4733	-0.4716	271.8205128	0.029466949	-0.047156202	10.64	0	-0.0002	-13.9052	0
171	0.2349	21.35	41.28	1.4738	-0.4717	273.7179487	0.029476399	-0.047166602	10.7	0	0.0006	-13.9052	0
172	0.2351	21.47	41.387	1.4745	-0.4718	275.2051282	0.029489649	-0.047184602	10.76	0	-0.0002	-13.9052	0
173	0.2352	21.58	41.491	1.4749	-0.472	276.6666667	0.029497199	-0.047195602	10.82	0	0.0006	-13.9052	0
174	0.2354	21.73	41.594	1.4754	-0.4721	278.5641026	0.029507249	-0.047206802	10.89	0	-0.0006	-13.9052	0
175	0.2357	21.89	41.75	1.4762	-0.4722	280.6666667	0.029523649	-0.047224002	10.98	0	0.0002	-13.9052	0
176	0.2358	22.04	41.855	1.4767	-0.4724	282.5641026	0.029533699	-0.047236602	11.04	0	-0.0002	-13.9052	0
177	0.236	22.17	41.958	1.4772	-0.4725	284.2564103	0.029544399	-0.047250002	11.11	0	-0.0002	-13.9052	0
178	0.2362	22.29	42.063	1.4777	-0.4726	285.7435897	0.029554499	-0.047264202	11.17	0	-0.001	-13.9052	0
179	0.2364	22.4	42.167	1.4782	-0.4728	287.2051282	0.029564549	-0.047276802	11.23	0	-0.0002	-13.9052	0
180	0.2365	22.53	42.271	1.4788	-0.4729	288.8974359	0.029575299	-0.047288002	11.3	0	-0.0006	-13.9052	0
181	0.2367	22.7	42.377	1.4793	-0.473	291	0.029585999	-0.047302002	11.36	0	0.0002	-13.9052	0
182	0.237	22.83	42.53	1.4801	-0.4732	292.6923077	0.029602349	-0.047321002	11.45	0	-0.0006	-13.9052	0
183	0.2371	22.99	42.632	1.4807	-0.4733	294.7948718	0.029614349	-0.047332002	11.51	0	-0.0002	-13.9052	0
184	0.2374	23.16	42.787	1.4815	-0.4735	296.8974359	0.029630699	-0.047351002	11.61	0	-0.0002	-13.9052	0
185	0.2376	23.27	42.891	1.482	-0.4736	298.3846154	0.029639499	-0.047364402	11.67	0	-0.0002	-13.9052	0
186	0.2378	23.4	42.993	1.4825	-0.4738	300.0512821	0.029649599	-0.047377002	11.73	0	0.0006	-13.9052	0
187	0.2379	23.54	43.095	1.4831	-0.4739	301.7435897	0.029662199	-0.047388802	11.8	0	0.0006	-13.9052	0
188	0.2381	23.67	43.196	1.4835	-0.474	303.4358974	0.029670999	-0.047401402	11.86	0	0.0018	-13.9052	0
189	0.2383	23.8	43.301	1.4841	-0.4741	305.1282051	0.029681699	-0.047414802	11.92	0	0.001	-13.9052	0
190	0.2385	23.91	43.402	1.4847	-0.4743	306.5897436	0.029694949	-0.047425802	11.98	0	0.0006	-13.9052	0
191	0.2386	24.05	43.502	1.4852	-0.4744	308.2820513	0.029704399	-0.047440802	12.05	0	0.001	-13.9052	0
192	0.2389	24.21	43.655	1.486	-0.4746	310.3846154	0.029720149	-0.047459002	12.14	0	0.0014	-13.9052	0
193	0.2391	24.36	43.756	1.4866	-0.4747	312.2820513	0.029731449	-0.047472402	12.2	0	0.0018	-13.9052	0
194	0.2393	24.54	43.907	1.4874	-0.4749	314.5897436	0.029748449	-0.047490402	12.3	0	0.0018	-13.9052	0
195	0.2395	24.67	44.006	1.4879	-0.475	316.2820513	0.029757299	-0.047502402	12.36	0	0.0018	-13.9052	0
196	0.2397	24.8	44.108	1.4884	-0.4752	317.974359	0.029767999	-0.047515802	12.42	0	0.0018	-13.9052	0
197	0.2398	24.92	44.207	1.4891	-0.4753	319.4358974	0.029781849	-0.047528402	12.48	0	0.0026	-13.9052	0
198	0.24	25.05	44.307	1.4894	-0.4753	321.1282051	0.029788799	-0.047534602	12.55	0	0.0022	-13.9052	0
199	0.2402	25.16	44.406	1.49	-0.4756	322.6153846	0.029799499	-0.047556002	12.61	0	0.0022	-13.9052	0
200	0.2404	25.31	44.508	1.4905	-0.4756	324.5128205	0.029810199	-0.047560602	12.67	0	0.001	-13.9052	0
201	0.2405	25.43	44.606	1.4911	-0.4757	325.974359	0.029821549	-0.047572402	12.73	0	0.0006	-13.9052	0
202	0.2407	25.56	44.705	1.4916	-0.4759	327.6666667	0.029832849	-0.047590602	12.8	0	-0.0002	-13.9052	0
203	0.2409	25.67	44.807	1.4921	-0.476	329.1282051	0.029841049	-0.047596802	12.86	0	-0.0002	-13.9052	0
204	0.2411	25.79	44.906	1.4926	-0.4762	330.6153846	0.029852999	-0.047623602	12.92	0	-0.0002	-13.9052	0
205	0.2412	25.92	45.004	1.4932	-0.4763	332.3076923	0.029864349	-0.047626802	12.99	0	-0.0002	-13.9052	0
206	0.2414	26.03	45.102	1.4937	-0.4764	333.7692308	0.029873149	-0.047637002	13.05	0	0.0002	-13.9052	0
207	0.2416	26.17	45.2	1.4943	-0.4766	335.4615385	0.029885749	-0.047658402	13.11	0	-0.0002	-13.9052	0
208	0.2417	26.3	45.301	1.4948	-0.4767	337.1538462	0.029895199	-0.047667002	13.18	0	-0.001	-13.9052	0
209	0.2419	26.45	45.399	1.4952	-0.4767	339.0512821	0.029904049	-0.047667002	13.24	0	-0.0002	-13.9052	0
210	0.2422	26.61	45.547	1.4961	-0.4769	341.1538462	0.029921049	-0.047689802	13.33	0	-0.0006	-13.9052	0
211	0.2424	26.72	45.644	1.4968	-0.4772	342.6153846	0.029935499	-0.047716002	13.4	0	-0.0002	-13.9052	0
212	0.2425	26.86	45.74	1.4973	-0.4773	344.3076923	0.029946849	-0.047726202	13.46	0	-0.0002	-13.9052	0
213	0.2427	26.97	45.837	1.4979	-0.4774	345.7948718	0.029957549	-0.047738002	13.52	0	-0.0006	-13.9052	0
214	0.2429	27.12	45.936	1.4983	-0.4774	347.6923077	0.029966999	-0.047742002	13.58	0	-0.0006	-13.9052	0
215	0.2431	27.23	46.033	1.499	-0.4776	349.1538462	0.029979599	-0.047764802	13.65	0	-0.0002	-13.9052	0
216	0.2432	27.35	46.128	1.4994	-0.4776	350.6410256	0.029988449	-0.047761602	13.71	0	-0.001	-13.9052	0
217	0.2434	27.51	46.226	1.5	-0.478	352.7435897	0.030000399	-0.047797002	13.77	0	0.0002	-13.9052	0
218	0.2437	27.68	46.369	1.5008	-0.478	354.8461538	0.030016149	-0.047801002	13.87	0	-0.0002	-13.9052	0
219	0.2438	27.79	46.468	1.5014	-0.4782	356.3076923	0.030028099	-0.047816802	13.93	0	-0.0002	-13.9052	0
220	0.244	27.92	46.563	1.5019	-0.4783	358	0.030038799	-0.047827002	14	0	-0.0006	-13.9052	0
221	0.2442	28.07	46.658	1.5024	-0.4784	359.8974359	0.030048249	-0.047841202	14.05	0	-0.0002	-13.9052	0
222	0.2444	28.2	46.753	1.5029	-0.4785	361.5897436	0.030058949	-0.047852202	14.12	0	-0.001	-13.9052	0
223	0.2446	28.35	46.897	1.5038	-0.4787	363.4871795	0.030075349	-0.047872802	14.21	0	-0.001	-13.9052	0
224	0.2448	28.5	46.996	1.5043	-0.4788	365.3846154	0.030086699	-0.047883002	14.27	0	-0.0006	-13.9052	0
225	0.245	28.61	47.09	1.505	-0.479	366.8461538	0.030099899	-0.047895602	14.33	0	-0.0006	-13.9052	0
226	0.2451	28.75	47.184	1.5055	-0.4791	368.5384615	0.030109999	-0.047908202	14.4	0	-0.001	-13.9052	0
227	0.2453	28.88	47.278	1.506	-0.4792	370.2307692	0.030120049	-0.047920002	14.46	0	0.0002	-13.9052	0
228	0.2455	28.99	47.372	1.5064	-0.4792	371.6923077	0.030128849	-0.047921602	14.52	0	-0.0006	-13.9052	0
229	0.2457	29.12	47.47	1.5072	-0.4793	373.3846154	0.030143349	-0.047928002	14.59	0	-0.001	-13.9052	0
230	0.2459	29.31	47.611	1.508	-0.4794	375.7179487	0.030160999	-0.047944402	14.68	0	-0.0002	-13.9052	0
231	0.2461	29.45	47.705	1.5085	-0.4799	377.5897436	0.030170449	-0.047986202	14.74	0	-0.0002	-13.9052	0
232	0.2463	29.57	47.797	1.509	-0.4799	379.0769231	0.030180499	-0.047991002	14.81	0	-0.0006	-13.9052	0
233	0.2464	29.7	47.891	1.5095	-0.48	380.7692308	0.030189949	-0.047999602	14.87	0	-0.001	-13.9052	0
234	0.2466	29.81	47.986	1.5101	-0.4801	382.2307692	0.030202549	-0.048010802	14.93	0	0.0002	-13.9052	0
235	0.2468	29.93	48.078	1.5107	-0.4802	383.7179487	0.030213249	-0.048021802	14.99	0	-0.001	-13.9052	0
236	0.247	30.08	48.169	1.5113	-0.4803	385.6153846	0.030225249	-0.048031202	15.06	0	-0.0006	-13.9052	0
237	0.2471	30.23	48.263	1.5118	-0.4805	387.5128205	0.030236549	-0.048045402	15.12	0	-0.0006	-13.9052	0
238	0.2473	30.34	48.354	1.5124	-0.4806	388.974359	0.030248549	-0.048058802	15.18	0	0.0002	-13.9052	0
239	0.2475	30.46	48.446	1.5129	-0.4807	390.4615385	0.030258599	-0.048069002	15.25	0	0.0002	-13.9052	0
240	0.2477	30.59	48.535	1.5135	-0.4808	392.1282051	0.030269299	-0.048080802	15.31	0	-0.001	-13.9052	0
241	0.2478	30.7	48.624	1.5141	-0.4809	393.6153846	0.030281299	-0.048093402	15.37	0	-0.001	-13.9052	0
242	0.2481	30.87	48.76	1.5148	-0.4811	395.7179487	0.030295749	-0.048113202	15.47	0	-0.0006	-13.9052	0
243	0.2483	31.03	48.852	1.5154	-0.4813	397.8205128	0.030307749	-0.048132802	15.53	0	-0.0006	-13.9052	0
244	0.2484	31.15	48.942	1.5159	-0.4814	399.3076923	0.030318449	-0.048140802	15.59	0	-0.0006	-13.9052	0
245	0.2486	31.28	49.032	1.5165	-0.4815	401	0.030329149	-0.048152602	15.66	0	-0.0002	-13.9052	0
246	0.2488	31.39	49.12	1.5169	-0.4816	402.4615385	0.030337949	-0.048159602	15.71	0	-0.0006	-13.9052	0
247	0.249	31.59	49.254	1.5178	-0.4818	405	0.030355599	-0.048178602	15.81	0	-0.001	-13.9052	0
248	0.2492	31.7	49.343	1.5183	-0.4819	406.4615385	0.030366949	-0.048189602	15.87	0	-0.0006	-13.9052	0
249	0.2494	31.82	49.434	1.5188	-0.482	407.9487179	0.030375749	-0.048203802	15.93	0	-0.0006	-13.9052	0
250	0.2496	31.95	49.521	1.5194	-0.4821	409.6410256	0.030388999	-0.048214802	16	0	-0.001	-13.9052	0
251	0.2497	32.07	49.609	1.52	-0.4823	411.1025641	0.030399049	-0.048228202	16.06	0	-0.0014	-13.9052	0
252	0.2499	32.21	49.696	1.5205	-0.4824	413	0.030410399	-0.048237002	16.12	0	-0.001	-13.9052	0
253	0.2501	32.33	49.784	1.521	-0.4825	414.4871795	0.030419849	-0.048252602	16.18	0	-0.0019	-13.9052	0
254	0.2503	32.46	49.87	1.5215	-0.4826	416.1538462	0.030429899	-0.048264602	16.25	0	-0.001	-13.9052	0
255	0.2504	32.58	49.956	1.5221	-0.4827	417.6410256	0.030441249	-0.048274802	16.31	0	-0.001	-13.9052	0
256	0.2506	32.72	50.041	1.5226	-0.4829	419.5384615	0.030452599	-0.048287402	16.37	0	-0.001	-13.9052	0
257	0.2508	32.86	50.128	1.5231	-0.483	421.2307692	0.030461399	-0.048301602	16.43	0	0.0006	-13.9052	0
258	0.251	33.04	50.255	1.5239	-0.4832	423.5384615	0.030477149	-0.048319602	16.53	0	-0.001	-13.9052	0
259	0.2513	33.2	50.383	1.5246	-0.4833	425.6410256	0.030492899	-0.048333802	16.62	0	-0.0002	-13.9052	0
260	0.2515	33.35	50.469	1.5252	-0.4835	427.5384615	0.030504249	-0.048347202	16.68	0	-0.0006	-13.9052	0
261	0.2516	33.5	50.554	1.5257	-0.4836	429.4358974	0.030514949	-0.048359802	16.75	0	-0.001	-13.9052	0
262	0.2519	33.64	50.679	1.5265	-0.4838	431.3333333	0.030530049	-0.048377202	16.84	0	-0.001	-13.9052	0
263	0.2521	33.79	50.76	1.527	-0.4839	433.2307692	0.030540149	-0.048390602	16.9	0	-0.0002	-13.9052	0
264	0.2523	33.91	50.843	1.5275	-0.484	434.6923077	0.030550849	-0.048401602	16.97	0	0.0002	-13.9052	0
265	0.2524	34.04	50.925	1.528	-0.4841	436.3846154	0.030560299	-0.048413402	17.03	0	-0.0002	-13.9052	0
266	0.2526	34.15	51.009	1.5287	-0.4843	437.8717949	0.030573499	-0.048426802	17.09	0	0.0002	-13.9052	0
267	0.2528	34.3	51.09	1.5291	-0.4844	439.7692308	0.030582949	-0.048437202	17.16	0	0.0002	-13.9052	0
268	0.2529	34.42	51.171	1.5298	-0.4845	441.2307692	0.030595549	-0.048448202	17.22	0	-0.0006	-13.9052	0
269	0.2531	34.55	51.252	1.5302	-0.4846	442.9230769	0.030604349	-0.048461602	17.28	0	0.0002	-13.9052	0
270	0.2533	34.66	51.336	1.5308	-0.4847	444.3846154	0.030615099	-0.048471002	17.34	0	-0.0002	-13.9052	0
271	0.2535	34.78	51.416	1.5312	-0.4848	445.8717949	0.030624499	-0.048484402	17.41	0	-0.0002	-13.9052	0
272	0.2536	34.93	51.497	1.5317	-0.485	447.7692308	0.030633949	-0.048495402	17.47	0	-0.0002	-13.9052	0
273	0.2538	35.06	51.575	1.5323	-0.4851	449.4615385	0.030645299	-0.048508002	17.53	0	-0.0002	-13.9052	0
274	0.254	35.17	51.656	1.5327	-0.4852	450.9230769	0.030653499	-0.048519202	17.59	0	-0.0006	-13.9052	0
275	0.2542	35.29	51.736	1.5333	-0.4853	452.4102564	0.030666099	-0.048529402	17.66	0	-0.0002	-13.9052	0
276	0.2543	35.42	51.814	1.5339	-0.4854	454.0769231	0.030677449	-0.048544402	17.72	0	-0.0002	-13.9052	0
277	0.2545	35.55	51.895	1.5345	-0.4856	455.7692308	0.030689399	-0.048555402	17.78	0	-0.001	-13.9052	0
278	0.2547	35.68	51.974	1.5349	-0.4857	457.4615385	0.030698849	-0.048567202	17.84	0	0.0002	-13.9052	0
279	0.2549	35.8	52.052	1.5354	-0.4858	458.9230769	0.030707649	-0.048578202	17.91	0	-0.001	-13.9052	0
280	0.255	35.93	52.13	1.536	-0.4859	460.6153846	0.030719599	-0.048588402	17.97	0	-0.001	-13.8332	0
281	0.2552	36.06	52.206	1.5365	-0.486	462.3076923	0.030729049	-0.048601802	18.03	0	0.0002	-13.751	0
282	0.2554	36.18	52.286	1.537	-0.4861	463.7948718	0.030740399	-0.048611402	18.09	0	-0.0002	-13.6232	0
283	0.2556	36.31	52.364	1.5376	-0.4862	465.4615385	0.030751749	-0.048624002	18.16	0	-0.0002	-13.2873	0
284	0.2557	36.44	52.441	1.5381	-0.4864	467.1538462	0.030761199	-0.048639002	18.22	0	0.0002	-12.8638	0
285	0.2559	36.55	52.518	1.5385	-0.4865	468.6410256	0.030770649	-0.048649202	18.28	0	-0.0002	-12.453	0
286	0.2561	36.68	52.597	1.5391	-0.4866	470.3076923	0.030781349	-0.048658602	18.34	0	-0.0002	-12.0423	0
287	0.2562	36.82	52.674	1.5397	-0.4867	472	0.030793299	-0.048670402	18.41	0	-0.001	-11.6315	0
288	0.2564	36.95	52.75	1.5401	-0.4868	473.6923077	0.030802149	-0.048683802	18.47	0	-0.001	-11.2076	0
289	0.2566	37.06	52.829	1.5407	-0.487	475.1538462	0.030814699	-0.048695602	18.53	0	-0.0006	-10.7968	0
290	0.2568	37.18	52.904	1.5412	-0.4871	476.6410256	0.030824149	-0.048708202	18.59	0	0.0002	-10.3861	0
291	0.2569	37.33	52.979	1.5417	-0.4872	478.5384615	0.030834849	-0.048719402	18.66	0	-0.0006	-9.9753	0
292	0.2571	37.44	53.054	1.5421	-0.4873	480	0.030842449	-0.048730402	18.72	0	-0.0006	-9.5513	0
293	0.2573	37.56	53.131	1.5428	-0.4874	481.4871795	0.030855049	-0.048741402	18.78	0	-0.0002	-9.1405	0
294	0.2575	37.69	53.207	1.5432	-0.4875	483.1794872	0.030863199	-0.048752402	18.85	0	0.0002	-8.7298	0
295	0.2576	37.82	53.281	1.5437	-0.4877	484.8461538	0.030874549	-0.048765002	18.91	0	-0.0006	-8.319	0
296	0.2578	37.92	53.355	1.5443	-0.4878	486.1282051	0.030885899	-0.048776002	18.97	0	-0.0002	-7.7857	0
297	0.258	38.05	53.428	1.5449	-0.4879	487.7948718	0.030898499	-0.048787802	19.03	0	0.001	-6.9611	0
298	0.2582	38.2	53.505	1.5454	-0.488	489.6923077	0.030907949	-0.048800602	19.1	0	-0.0002	-6.0556	0
299	0.2583	38.33	53.579	1.5459	-0.4881	491.3846154	0.030917999	-0.048812402	19.16	0	0.0006	-5.0768	0
300	0.2585	38.44	53.652	1.5464	-0.4882	492.8717949	0.030928099	-0.048823402	19.22	0	0.0002	-4.0592	0
301	0.2587	38.56	53.724	1.547	-0.4883	494.3333333	0.030939399	-0.048834402	19.28	0	0.001	-3.0735	0
302	0.2589	38.72	53.798	1.5475	-0.4884	496.4358974	0.030950149	-0.048843802	19.35	0	0.0002	-2.0876	0
303	0.259	38.82	53.87	1.5481	-0.4886	497.7179487	0.030962099	-0.048857202	19.41	0	-0.0002	-1.1019	0
304	0.2592	38.97	53.942	1.5485	-0.4887	499.6153846	0.030970299	-0.048868202	19.47	0	0.0006	-0.0843	0
305	0.2595	39.13	54.052	1.5493	-0.4888	501.7179487	0.030986049	-0.048884802	19.56	0	0.0002	1.3786	0
306	0.2596	39.25	54.124	1.5499	-0.489	503.1794872	0.030998599	-0.048898202	19.63	0	0.001	2.3962	0
307	0.2598	39.38	54.199	1.5503	-0.4891	504.8717949	0.031006199	-0.048905402	19.69	0	-0.0002	3.382	0
308	0.26	39.49	54.271	1.5509	-0.4892	506.3333333	0.031018799	-0.048923402	19.75	0	0.0002	4.3678	0
309	0.2602	39.63	54.343	1.5515	-0.4893	508.025641	0.031030749	-0.048931402	19.82	0	0.001	5.3536	0
310	0.2603	39.74	54.415	1.552	-0.4894	509.5128205	0.031040199	-0.048939202	19.87	0	0.0002	6.3712	0
311	0.2605	39.89	54.474	1.5526	-0.4894	511.4102564	0.031051549	-0.048942402	19.9	0	0.0006	7.3569	0		Ӧ��	Ӧ��
312	0.2654	40	54.832	1.5557	-0.49	512.8717949	0.031113899	-0.049002202	19.99	0	0.0018	35.6643	0		0	21.2986658
313	2.5111	40.17	66.539	1.5864	-0.5294	514.974359	0.031728549	-0.052943403	20	0	2	43.684	0		0	21.38918513
314	2.5112	40.32	66.575	1.5865	-0.5293	516.8717949	0.031729199	-0.052934803	20	0	2	43.6841	0		0.0008	21.46905513
315	2.5113	40.43	66.609	1.5866	-0.5294	518.3589744	0.031731699	-0.052942603	20	0	2	43.6841	0		0.0016	21.52762646
316	2.5114	40.55	66.646	1.5866	-0.5294	519.8205128	0.031732949	-0.052938003	20	0	1.9988	43.684	0		0.0016	21.59152246
317	2.5115	40.69	66.683	1.5868	-0.5294	521.7179487	0.031735499	-0.052937203	20	0	1.9996	43.6841	0		0.0032	21.66606779
318	2.5115	40.81	66.718	1.5869	-0.5293	523.2051282	0.031737999	-0.052930003	20	0	2	43.6841	0		0.004	21.72996379
319	2.5117	41.04	66.798	1.5873	-0.5293	526.1538462	0.031745549	-0.052929203	20	0	1.9992	43.6843	0		0.0072	21.85243112
320	2.5119	41.25	66.882	1.5877	-0.5292	528.8974359	0.031754399	-0.052919003	20	0	1.9996	43.6843	0		0.0104	21.96424911
321	2.512	41.37	66.925	1.5879	-0.5292	530.3589744	0.031758799	-0.052915003	20	0	2	43.6843	0		0.012	22.02814511
322	2.5121	41.48	66.973	1.5883	-0.5291	531.8461538	0.031765699	-0.052909603	20	0	2	43.6843	0		0.0152	22.08671644
323	2.5121	41.6	67.02	1.5885	-0.5291	533.3076923	0.031769499	-0.052905603	20	0	2.0012	43.6842	0		0.0168	22.15061244
324	2.5122	41.73	67.065	1.5888	-0.529	535	0.031775799	-0.052900803	20	0	2.0008	43.6842	0		0.0192	22.2198331
325	2.5123	41.86	67.112	1.589	-0.5289	536.6923077	0.031780849	-0.052893003	20	0	2	43.6842	0		0.0208	22.28905376
326	2.5124	41.98	67.159	1.5894	-0.5289	538.1538462	0.031787749	-0.052889003	20	0	2.0008	43.6842	0		0.024	22.35294976
327	2.5125	42.12	67.203	1.5896	-0.5288	540.0512821	0.031792799	-0.052880403	20	0	2	43.6841	0		0.0256	22.42749509
328	2.5126	42.22	67.25	1.59	-0.5288	541.3333333	0.031799099	-0.052878003	20	0	2.0004	43.6841	0		0.0288	22.48074176
329	2.5127	42.37	67.293	1.5902	-0.5287	543.2307692	0.031804749	-0.052874003	20	0	2	43.6841	0		0.0304	22.56061175
330	2.5128	42.52	67.339	1.5905	-0.5286	545.1282051	0.031810449	-0.052863003	20	0	2	43.6841	0		0.0328	22.64048175
331	2.5129	42.75	67.427	1.591	-0.5286	548.0769231	0.031820499	-0.052857603	20	0	1.9996	43.6839	0		0.0368	22.76294908
332	2.513	42.88	67.473	1.5913	-0.5285	549.7435897	0.031826199	-0.052854403	20	0	1.9996	43.6839	0		0.0392	22.83216974
333	2.5131	43.01	67.519	1.5916	-0.5284	551.4358974	0.031831199	-0.052844803	20	0	2	43.6839	0		0.0416	22.90139041
334	2.5132	43.13	67.561	1.5919	-0.5284	552.9230769	0.031837499	-0.052842603	20	0	2	43.6839	0		0.044	22.9652864
335	2.5133	43.24	67.607	1.5922	-0.5284	554.3846154	0.031844449	-0.052837803	20	0	2	43.6839	0		0.0464	23.02385773
336	2.5134	43.36	67.649	1.5923	-0.5283	555.8717949	0.031846949	-0.052831403	20	0	2.0004	43.6838	0		0.0472	23.08775373
337	2.5135	43.51	67.694	1.5928	-0.5283	557.7692308	0.031855149	-0.052825203	20	0	1.9992	43.6838	0		0.0512	23.16762373
338	2.5135	43.62	67.74	1.593	-0.5282	559.2307692	0.031860199	-0.052819603	20	0	1.9996	43.6838	0		0.0528	23.22619506
339	2.5136	43.74	67.782	1.5933	-0.5282	560.7179487	0.031865199	-0.052815803	20	0	2	43.6838	0		0.0552	23.29009106
340	2.5137	43.87	67.827	1.5937	-0.5281	562.3846154	0.031873399	-0.052809403	20	0	2	43.6838	0		0.0584	23.35931172
341	2.5138	44	67.869	1.5938	-0.528	564.0769231	0.031876549	-0.052804603	20	0	2	43.6838	0		0.0592	23.42853238
342	2.5139	44.11	67.914	1.5941	-0.528	565.5641026	0.031882249	-0.052797603	20	0	2	43.6838	0		0.0616	23.48710372
343	2.514	44.26	67.96	1.5945	-0.5279	567.4615385	0.031889149	-0.052791203	20	0	2	43.6838	0		0.0648	23.56697371
344	2.5141	44.39	68.002	1.5946	-0.5279	569.1282051	0.031892299	-0.052788203	20	0	1.9992	43.6838	0		0.0656	23.63619438
345	2.5142	44.62	68.091	1.5954	-0.5277	572.0769231	0.031907399	-0.052774803	20	0	2	43.6841	0		0.072	23.7586617
346	2.5143	44.75	68.134	1.5955	-0.5277	573.7692308	0.031909299	-0.052774803	20	0	1.9996	43.6841	0		0.0728	23.82788237
347	2.5144	44.89	68.179	1.5958	-0.5277	575.4615385	0.031916249	-0.052766003	20	0	1.9996	43.6842	0		0.0752	23.9024277
348	2.5145	45.02	68.224	1.596	-0.5276	577.1538462	0.031920649	-0.052758203	20	0	1.9996	43.6843	0		0.0768	23.97164836
349	2.5147	45.26	68.311	1.5966	-0.5275	580.3076923	0.031932599	-0.052746403	20	0	1.9996	43.6849	0		0.0816	24.09944036
350	2.5148	45.38	68.353	1.5969	-0.5274	581.7692308	0.031938899	-0.052744803	20	0	1.9996	43.6852	0		0.084	24.16333636
351	2.5148	45.51	68.398	1.5972	-0.5274	583.4615385	0.031943949	-0.052737003	20	0	2.0008	43.6853	0		0.0864	24.23255702
352	2.5149	45.64	68.442	1.5974	-0.5273	585.1538462	0.031948999	-0.052729003	20	0	2	43.6853	0		0.088	24.30177768
353	2.5151	45.87	68.529	1.598	-0.5272	588.1025641	0.031960949	-0.052718803	20	0	2.0004	43.685	0		0.0928	24.42424501
354	2.5152	46.02	68.573	1.5984	-0.5271	590	0.031968499	-0.052712403	20	0	2.0004	43.6848	0		0.096	24.50411501
355	2.5153	46.13	68.614	1.5986	-0.5271	591.4615385	0.031971049	-0.052708603	20	0	2.0008	43.6847	0		0.0976	24.56268634
356	2.5154	46.25	68.659	1.5989	-0.527	592.9487179	0.031977949	-0.052704603	20	0	2	43.6845	0		0.1	24.62658234
357	2.5154	46.38	68.7	1.5991	-0.527	594.6410256	0.031982999	-0.052695203	20	0	2.0004	43.6844	0		0.1016	24.695803
358	2.5155	46.5	68.743	1.5994	-0.5269	596.1025641	0.031987399	-0.052692003	20	0	2	43.6842	0		0.104	24.759699
359	2.5156	46.64	68.788	1.5997	-0.5268	598	0.031994949	-0.052680203	20	0	2	43.6839	0		0.1064	24.83424433
360	2.5157	46.76	68.83	1.6	-0.5267	599.4871795	0.032000649	-0.052674603	20	0	2	43.6838	0		0.1088	24.89814033
361	2.5158	46.89	68.873	1.6002	-0.5267	601.1538462	0.032003799	-0.052670603	20	0	2.0008	43.6838	0		0.1104	24.96736099
362	2.5159	46.99	68.915	1.6006	-0.5267	602.4358974	0.032011949	-0.052670603	20	0	2	43.6837	0		0.1136	25.02060765
363	2.516	47.14	68.958	1.6008	-0.5266	604.3333333	0.032016999	-0.052660403	20	0	2.0004	43.6835	0		0.1152	25.10047765
364	2.5161	47.25	69.002	1.6011	-0.5266	605.7948718	0.032022649	-0.052655803	20	0	2.0004	43.6832	0		0.1176	25.15904898
365	2.5161	47.38	69.042	1.6014	-0.5264	607.4871795	0.032028349	-0.052644603	20	0	2.0004	43.6829	0		0.12	25.22826965
366	2.5162	47.53	69.086	1.6017	-0.5264	609.3846154	0.032034649	-0.052641603	20	0	2	43.6827	0		0.1224	25.30813964
367	2.5164	47.76	69.171	1.6022	-0.5263	612.3333333	0.032044699	-0.052628202	20	0	2	43.6822	0		0.1264	25.43060697
368	2.5165	47.88	69.215	1.6025	-0.5263	613.7948718	0.032050999	-0.052627402	20	0	2	43.6819	0		0.1288	25.49450297
369	2.5166	48.02	69.256	1.6028	-0.5262	615.6923077	0.032056699	-0.052617002	20	0	2.0004	43.6816	0		0.1312	25.5690483
370	2.5167	48.16	69.299	1.6031	-0.5261	617.3846154	0.032062999	-0.052612402	20	0	2.0008	43.6812	0		0.1336	25.64359363
371	2.5167	48.27	69.343	1.6035	-0.5261	618.8717949	0.032069899	-0.052605202	20	0	2.0004	43.681	0		0.1368	25.70216496
372	2.5168	48.4	69.383	1.6037	-0.526	620.5384615	0.032073699	-0.052595002	20	0	2.0008	43.6809	0		0.1384	25.77138562
373	2.5169	48.52	69.426	1.604	-0.5259	622.025641	0.032080599	-0.052589602	20	0	2	43.6808	0		0.1408	25.83528162
374	2.517	48.63	69.469	1.6043	-0.5259	623.4871795	0.032085649	-0.052588802	20	0	2.0004	43.6804	0		0.1432	25.89385295
375	2.5171	48.78	69.51	1.6047	-0.5258	625.3846154	0.032093199	-0.052576802	20	0	2.0004	43.68	0		0.1464	25.97372295
376	2.5172	48.9	69.553	1.6049	-0.5258	626.8717949	0.032097599	-0.052576802	20	0	2	43.6798	0		0.148	26.03761895
377	2.5173	49.03	69.597	1.6052	-0.5257	628.5641026	0.032104549	-0.052569802	20	0	2.0004	43.6797	0		0.1504	26.10683961
378	2.5174	49.27	69.681	1.6059	-0.5256	631.7179487	0.032118399	-0.052556402	20	0	2.0008	43.6793	0		0.156	26.2346316
379	2.5175	49.39	69.721	1.6061	-0.5254	633.2051282	0.032121549	-0.052543802	20	0	2	43.679	0		0.1576	26.2985276
380	2.5176	49.54	69.764	1.6065	-0.5254	635.0769231	0.032130349	-0.052543002	20	0	2.0004	43.6787	0		0.1608	26.3783976
381	2.5177	49.65	69.807	1.6066	-0.5253	636.5641026	0.032132249	-0.052532002	20	0	2	43.6785	0		0.1616	26.43696893
382	2.5178	49.77	69.848	1.607	-0.5253	638.0512821	0.032139799	-0.052528802	20	0	1.9996	43.6782	0		0.1648	26.50086493
383	2.5179	49.88	69.891	1.6073	-0.5252	639.5128205	0.032145499	-0.052522602	20	0	2	43.6781	0		0.1672	26.55943626
384	2.518	50	69.931	1.6076	-0.5252	641	0.032152399	-0.052517802	20	0	2.0008	43.6779	0		0.1696	26.62333226
385	2.5181	50.11	69.974	1.6079	-0.5251	642.4615385	0.032158699	-0.052508402	20	0	2.0008	43.6776	0		0.172	26.68190359
386	2.5181	50.26	70.018	1.6082	-0.525	644.3589744	0.032164399	-0.052500402	20	0	2	43.6774	0		0.1744	26.76177358
387	2.5182	50.38	70.059	1.6084	-0.5249	645.8461538	0.032168149	-0.052494202	20	0	2.0004	43.6771	0		0.176	26.82566958
388	2.5183	50.52	70.101	1.6088	-0.5249	647.7435897	0.032176349	-0.052487802	20	0	2.0008	43.6768	0		0.1792	26.90021491
389	2.5184	50.65	70.141	1.6091	-0.5248	649.4102564	0.032181999	-0.052479202	20	0	2	43.6764	0		0.1816	26.96943557
390	2.5186	50.9	70.227	1.6097	-0.5247	652.5897436	0.032193999	-0.052468202	20	0	2.0004	43.6759	0		0.1864	27.10255224
391	2.5187	51.13	70.31	1.6103	-0.5246	655.5384615	0.032205949	-0.052460202	20	0	2.0004	43.6754	0		0.1912	27.22501956
392	2.5189	51.26	70.353	1.6106	-0.5245	657.2051282	0.032212849	-0.052449202	20	0	2.0004	43.6751	0		0.1936	27.29424023
393	2.519	51.53	70.436	1.6112	-0.5244	660.5897436	0.032223599	-0.052436602	20	0	2.0004	43.6747	0		0.1984	27.43800622
394	2.5191	51.64	70.479	1.6116	-0.5243	662.0512821	0.032231149	-0.052429402	20	0	2.0008	43.6744	0		0.2016	27.49657755
395	2.5192	51.77	70.519	1.6119	-0.5242	663.7435897	0.032237449	-0.052423202	20	0	2.0008	43.6742	0		0.204	27.56579822
396	2.5193	51.89	70.561	1.6122	-0.5242	665.2307692	0.032244349	-0.052417602	20	0	2.0012	43.6738	0		0.2064	27.62969421
397	2.5194	52.02	70.603	1.6125	-0.5241	666.8974359	0.032249399	-0.052411402	20	0	2	43.6734	0		0.2088	27.69891488
398	2.5194	52.15	70.643	1.6128	-0.524	668.5897436	0.032255699	-0.052400402	20	0	2.0004	43.6732	0		0.2112	27.76813554
399	2.5195	52.27	70.686	1.6132	-0.5239	670.0769231	0.032264499	-0.052394802	20	0	2	43.6728	0		0.2144	27.83203154
400	2.5196	52.41	70.725	1.6134	-0.5239	671.974359	0.032268299	-0.052387002	20	0	2.0004	43.6727	0		0.216	27.90657687
401	2.5198	52.66	70.81	1.6141	-0.5237	675.1282051	0.032281499	-0.052372002	20	0	2.0004	43.6723	0		0.2216	28.03969353
402	2.52	52.89	70.892	1.6146	-0.5236	678.0769231	0.032292849	-0.052356202	20	0	2.0004	43.6719	0		0.2256	28.16216086
403	2.52	53.02	70.931	1.615	-0.5235	679.7692308	0.032300399	-0.052351402	20	0	2.0004	43.6719	0		0.2288	28.23138152
404	2.5201	53.15	70.974	1.6152	-0.5235	681.4358974	0.032304799	-0.052346802	20	0	2	43.6717	0		0.2304	28.30060219
405	2.5202	53.25	71.016	1.6156	-0.5233	682.7179487	0.032312399	-0.052333402	20	0	2.0008	43.6717	0		0.2336	28.35384885
406	2.5203	53.4	71.055	1.616	-0.5233	684.6153846	0.032319299	-0.052331802	20	0	2	43.6716	0		0.2368	28.43371885
407	2.5204	53.51	71.098	1.6162	-0.5232	686.0769231	0.032324349	-0.052323802	20	0	2.0004	43.6713	0		0.2384	28.49229018
408	2.5205	53.65	71.14	1.6166	-0.5231	687.7692308	0.032331249	-0.052314402	20	0	2	43.6712	0		0.2416	28.56683551
409	2.5206	53.76	71.18	1.6168	-0.5231	689.2307692	0.032336299	-0.052305802	20	0	1.9996	43.6712	0		0.2432	28.62540684
410	2.5207	53.89	71.222	1.6172	-0.523	690.9230769	0.032343249	-0.052301802	20	0	1.9996	43.671	0		0.2464	28.6946275
411	2.5207	54.02	71.264	1.6175	-0.523	692.6153846	0.032350149	-0.052295602	20	0	2.0004	43.6709	0		0.2488	28.76384817
412	2.5208	54.16	71.303	1.6179	-0.5229	694.3076923	0.032357099	-0.052287602	20	0	2	43.6707	0		0.252	28.8383935
413	2.5209	54.27	71.345	1.6181	-0.5228	695.7692308	0.032362749	-0.052279002	20	0	2	43.6707	0		0.2536	28.89696483
414	2.521	54.42	71.384	1.6185	-0.5227	697.6666667	0.032369049	-0.052270202	20	0	1.9996	43.6705	0		0.2568	28.97683483
415	2.5211	54.53	71.426	1.6187	-0.5226	699.1538462	0.032373449	-0.052264002	20	0	2.0004	43.6703	0		0.2584	29.03540616
416	2.5212	54.65	71.468	1.6191	-0.5225	700.6153846	0.032381049	-0.052253802	20	0	2	43.6701	0		0.2616	29.09930216
417	2.5213	54.78	71.506	1.6194	-0.5225	702.3076923	0.032387349	-0.052249002	20	0	2	43.6698	0		0.264	29.16852282
418	2.5214	54.91	71.547	1.6197	-0.5224	704	0.032394249	-0.052243402	20	0	1.9996	43.6696	0		0.2664	29.23774348
419	2.5214	55.03	71.587	1.62	-0.5224	705.4615385	0.032399899	-0.052236402	20	0	1.9996	43.6696	0		0.2688	29.30163948
420	2.5215	55.16	71.629	1.6203	-0.5223	707.1538462	0.032406849	-0.052228602	20	0	2.0004	43.6696	0		0.2712	29.37086014
421	2.5216	55.29	71.67	1.6205	-0.5222	708.8461538	0.032409999	-0.052216602	20	0	2.0004	43.6696	0		0.2728	29.44008081
422	2.5218	55.54	71.751	1.6212	-0.5221	712	0.032424499	-0.052205602	20	0	1.9996	43.6697	0		0.2784	29.57319747
423	2.5219	55.65	71.793	1.6217	-0.5219	713.4615385	0.032433299	-0.052193802	20	0	1.9992	43.6697	0		0.2824	29.6317688
424	2.522	55.77	71.832	1.6219	-0.5219	714.9487179	0.032438949	-0.052186002	20	0	2.0004	43.6698	0		0.284	29.6956648
425	2.522	55.93	71.873	1.6222	-0.5218	717.0512821	0.032443999	-0.052180402	20	0	2	43.67	0		0.2864	29.78085946
426	2.5222	56.16	71.953	1.6228	-0.5217	720	0.032455349	-0.052165402	20	0	1.9996	43.6703	0		0.2912	29.90332679
427	2.5223	56.28	71.995	1.6232	-0.5216	721.4871795	0.032464799	-0.052156802	20	0	2	43.6703	0		0.2944	29.96722279
428	2.5224	56.39	72.034	1.6236	-0.5215	722.9487179	0.032471099	-0.052154402	20	0	1.9996	43.6704	0		0.2976	30.02579412
429	2.5225	56.52	72.075	1.6238	-0.5214	724.6410256	0.032476149	-0.052139402	20	0	2.0004	43.6705	0		0.2992	30.09501478
430	2.5226	56.65	72.117	1.6241	-0.5213	726.3333333	0.032481799	-0.052132402	20	0	2.0008	43.6705	0		0.3016	30.16423545
431	2.5227	56.77	72.156	1.6245	-0.5212	727.7948718	0.032489349	-0.052124402	20	0	2	43.6705	0		0.3048	30.22813144
432	2.5227	56.88	72.198	1.6247	-0.5212	729.2820513	0.032494999	-0.052116602	20	0	1.9996	43.6705	0		0.3064	30.28670277
433	2.5228	57	72.236	1.625	-0.521	730.7435897	0.032500699	-0.052104802	20	0	1.9996	43.6705	0		0.3088	30.35059877
434	2.5229	57.16	72.277	1.6254	-0.521	732.8461538	0.032508899	-0.052101602	20	0	1.9996	43.6708	0		0.312	30.43579343
435	2.523	57.28	72.319	1.6258	-0.5209	734.3333333	0.032515199	-0.052093002	20	0	1.9996	43.6709	0		0.3152	30.49968943
436	2.5232	57.52	72.399	1.6265	-0.5207	737.4871795	0.032529649	-0.052073202	20	0	2.0004	43.671	0		0.3208	30.62748143
437	2.5233	57.67	72.44	1.6266	-0.5207	739.3846154	0.032532199	-0.052070002	20	0	2.0004	43.6712	0		0.3216	30.70735142
438	2.5234	57.9	72.518	1.6274	-0.5205	742.3333333	0.032547899	-0.052049602	20	0	2	43.6712	0		0.328	30.82981875
439	2.5235	58.02	72.556	1.6276	-0.5204	743.8205128	0.032552949	-0.052043202	20	0	1.9996	43.6712	0		0.3296	30.89371475
440	2.5236	58.15	72.598	1.628	-0.5203	745.5128205	0.032560499	-0.052033802	20	0	1.9992	43.6712	0		0.3328	30.96293541
441	2.5237	58.3	72.639	1.6283	-0.5203	747.3846154	0.032566199	-0.052032202	20	0	2.0004	43.6713	0		0.3352	31.04280541
442	2.5238	58.4	72.677	1.6286	-0.5202	748.6666667	0.032571849	-0.052018002	20	0	1.9988	43.6714	0		0.3376	31.09605207
443	2.5239	58.53	72.718	1.629	-0.5201	750.3589744	0.032580049	-0.052011802	20	0	1.9992	43.6716	0		0.3408	31.16527274
444	2.524	58.66	72.759	1.6293	-0.5201	752.025641	0.032585099	-0.052007802	20	0	2.0004	43.672	0		0.3432	31.2344934
445	2.524	58.77	72.797	1.6295	-0.5199	753.5128205	0.032590099	-0.051992002	20	0	1.9996	43.672	0		0.3448	31.29306473
446	2.5241	58.89	72.839	1.6299	-0.5198	754.974359	0.032597699	-0.051981802	20	0	1.9996	43.6723	0		0.348	31.35696073
447	2.5242	59.04	72.88	1.6303	-0.5197	756.8717949	0.032605249	-0.051974002	20	0	1.9996	43.6723	0		0.3512	31.43683073
448	2.5243	59.17	72.917	1.6306	-0.5196	758.5641026	0.032611549	-0.051961202	20	0	1.9996	43.6723	0		0.3536	31.50605139
449	2.5244	59.28	72.959	1.631	-0.5195	760.0512821	0.032619099	-0.051953402	20	0	2.0004	43.6724	0		0.3568	31.56462272
450	2.5245	59.41	72.997	1.6312	-0.5195	761.7179487	0.032624149	-0.051945602	20	0	2.0004	43.6725	0		0.3584	31.63384339
451	2.5246	59.53	73.038	1.6316	-0.5194	763.2051282	0.032631049	-0.051940802	20	0	2	43.6726	0		0.3616	31.69773938
452	2.5246	59.66	73.079	1.6318	-0.5193	764.8974359	0.032636749	-0.051933802	20	0	2	43.6726	0		0.3632	31.76696005
453	2.5247	59.78	73.117	1.6322	-0.5193	766.3589744	0.032643649	-0.051929802	20	0	2	43.6725	0		0.3664	31.83085604
454	2.5248	59.91	73.157	1.6325	-0.5192	768.0512821	0.032650599	-0.051917202	20	0	2.0008	43.6725	0		0.3688	31.90007671
455	2.5249	60.04	73.195	1.6329	-0.5191	769.7435897	0.032658749	-0.051907002	20	0	2.0004	43.6725	0		0.372	31.96929737
456	2.525	60.17	73.235	1.6332	-0.519	771.4102564	0.032663799	-0.051899002	20	0	2.0004	43.6724	0		0.3744	32.03851804
457	2.5251	60.29	73.276	1.6334	-0.5189	772.8974359	0.032668849	-0.051891202	20	0	1.9996	43.6721	0		0.376	32.10241403
458	2.5252	60.42	73.314	1.6338	-0.5188	774.5897436	0.032675149	-0.051880802	20	0	2.0004	43.6721	0		0.3792	32.1716347
459	2.5253	60.53	73.354	1.6342	-0.5188	776.0512821	0.032683349	-0.051876202	20	0	2	43.6719	0		0.3824	32.23020603
460	2.5253	60.65	73.395	1.6345	-0.5185	777.5384615	0.032690249	-0.051853402	20	0	2.0004	43.6717	0		0.3848	32.29410203
461	2.5254	60.81	73.433	1.6348	-0.5185	779.6410256	0.032696549	-0.051851002	20	0	2.0008	43.6716	0		0.3872	32.37929669
462	2.5256	61.06	73.514	1.6356	-0.5183	782.7948718	0.032711649	-0.051834402	20	0	2.0004	43.6711	0		0.3936	32.51241335
463	2.5257	61.17	73.552	1.6359	-0.5183	784.2820513	0.032717949	-0.051833602	20	0	2	43.6708	0		0.396	32.57098468
464	2.5258	61.29	73.592	1.6362	-0.5182	785.7435897	0.032723649	-0.051821002	20	0	1.9996	43.6706	0		0.3984	32.63488068
465	2.526	61.53	73.67	1.6367	-0.5181	788.8974359	0.032734349	-0.051806002	20	0	2.0004	43.67	0		0.4024	32.76267267
466	2.526	61.63	73.708	1.6371	-0.5179	790.1794872	0.032742549	-0.051789402	20	0	2.0004	43.6696	0		0.4056	32.81591934
467	2.5261	61.78	73.748	1.6374	-0.5179	792.0769231	0.032747549	-0.051793402	20	0	2.0004	43.6694	0		0.408	32.89578933
468	2.5262	61.91	73.788	1.6379	-0.5177	793.7435897	0.032757649	-0.051773602	20	0	2.0004	43.669	0		0.412	32.96501
469	2.5263	62.04	73.826	1.6381	-0.5177	795.4358974	0.032762699	-0.051772202	20	0	2.0004	43.6686	0		0.4136	33.03423066
470	2.5265	62.27	73.907	1.6388	-0.5175	798.3846154	0.032776549	-0.051750802	20	0	2	43.6682	0		0.4192	33.15669799
471	2.5266	62.42	73.944	1.6391	-0.5175	800.2820513	0.032782199	-0.051746202	20	0	2	43.6681	0		0.4216	33.23656799
472	2.5266	62.54	73.984	1.6395	-0.5173	801.7692308	0.032790399	-0.051733402	20	0	2.0008	43.6681	0		0.4248	33.30046399
473	2.5267	62.67	74.024	1.6398	-0.5172	803.4358974	0.032796049	-0.051720802	20	0	2.0004	43.6681	0		0.4272	33.36968465
474	2.5268	62.8	74.062	1.6401	-0.5171	805.1282051	0.032802999	-0.051713002	20	0	2	43.6681	0		0.4296	33.43890531
475	2.5269	62.92	74.101	1.6404	-0.5171	806.6153846	0.032808649	-0.051710602	20	0	2.0008	43.6681	0		0.432	33.50280131
476	2.527	63.06	74.139	1.6408	-0.517	808.5128205	0.032816849	-0.051698802	20	0	2	43.668	0		0.4352	33.57734664
477	2.5272	63.28	74.218	1.6414	-0.5168	811.2307692	0.032828799	-0.051675202	20	0	1.9996	43.6679	0		0.44	33.6944893
478	2.5273	63.41	74.255	1.6418	-0.5167	812.9230769	0.032836349	-0.051669602	20	0	2.0004	43.6677	0		0.4432	33.76370997
479	2.5273	63.54	74.295	1.6421	-0.5166	814.6153846	0.032842049	-0.051657002	20	0	2.0004	43.6677	0		0.4456	33.83293063
480	2.5274	63.67	74.335	1.6424	-0.5165	816.3076923	0.032848949	-0.051648402	20	0	1.9996	43.6674	0		0.448	33.90215129
481	2.5275	63.79	74.373	1.6428	-0.5164	817.7692308	0.032855899	-0.051640402	20	0	2.0004	43.6674	0		0.4512	33.96604729
482	2.5276	63.92	74.412	1.6431	-0.5164	819.4615385	0.032862199	-0.051635002	20	0	1.9992	43.6675	0		0.4536	34.03526796
483	2.5277	64.05	74.449	1.6435	-0.5163	821.1538462	0.032869099	-0.051627002	20	0	2	43.6676	0		0.4568	34.10448862
484	2.5279	64.26	74.528	1.6441	-0.516	823.8717949	0.032881699	-0.051603402	20	0	2	43.6678	0		0.4616	34.21630661
485	2.5279	64.43	74.566	1.6444	-0.5159	826	0.032888649	-0.051590002	20	0	1.9996	43.6679	0		0.464	34.30682594
486	2.528	64.54	74.606	1.6448	-0.5159	827.4615385	0.032896199	-0.051594002	20	0	2.0004	43.6679	0		0.4672	34.36539728
487	2.5281	64.66	74.646	1.6451	-0.5158	828.9487179	0.032902499	-0.051575002	20	0	2.0004	43.668	0		0.4696	34.42929327
488	2.5282	64.81	74.684	1.6455	-0.5157	830.8461538	0.032909449	-0.051571202	20	0	2	43.6684	0		0.4728	34.50916327
489	2.5284	65.05	74.761	1.6462	-0.5154	834	0.032923299	-0.051542002	20	0	1.9996	43.6684	0		0.4784	34.63695526
490	2.5285	65.17	74.801	1.6465	-0.5153	835.4615385	0.032930199	-0.051534802	20	0	2	43.6684	0		0.4808	34.70085126
491	2.5286	65.28	74.84	1.6468	-0.5153	836.9487179	0.032935249	-0.051526202	20	0	2.0004	43.6684	0		0.4832	34.75942259
492	2.5286	65.41	74.876	1.6472	-0.5151	838.6410256	0.032943449	-0.051513602	20	0	1.9996	43.6684	0		0.4864	34.82864326
493	2.5287	65.53	74.916	1.6475	-0.5151	840.1025641	0.032949099	-0.051506402	20	0	1.9996	43.6684	0		0.4888	34.89253925
494	2.5288	65.66	74.955	1.6479	-0.515	841.7948718	0.032957299	-0.051497802	20	0	2	43.6684	0		0.492	34.96175992
495	2.5289	65.78	74.991	1.6481	-0.5149	843.2820513	0.032961699	-0.051489202	20	0	2	43.6684	0		0.4936	35.02565592
496	2.529	65.91	75.031	1.6485	-0.5148	844.9487179	0.032970499	-0.051481202	20	0	2.0004	43.6685	0		0.4968	35.09487658
497	2.5291	66.02	75.071	1.6488	-0.5147	846.4358974	0.032976799	-0.051471802	20	0	2	43.6685	0		0.4992	35.15344791
498	2.5292	66.19	75.108	1.6492	-0.5145	848.5384615	0.032983099	-0.051453602	20	0	1.9996	43.6686	0		0.5024	35.24396724
499	2.5293	66.42	75.185	1.6498	-0.5144	851.4871795	0.032996949	-0.051440202	20	0	1.9992	43.6686	0		0.5072	35.36643457
500	2.5294	66.55	75.225	1.6502	-0.5143	853.1794872	0.033003899	-0.051434802	20	0	2	43.6687	0		0.5104	35.43565523
501	2.5295	66.66	75.265	1.6505	-0.5142	854.6410256	0.033009549	-0.051422202	20	0	2.0004	43.6689	0		0.5128	35.49422656
502	2.5296	66.78	75.302	1.6509	-0.5141	856.1282051	0.033017099	-0.051408802	20	0	1.9996	43.669	0		0.516	35.55812256
503	2.5297	66.94	75.341	1.6511	-0.514	858.2307692	0.033022799	-0.051397802	20	0	1.9996	43.669	0		0.5176	35.64331722
504	2.5298	67.06	75.381	1.6516	-0.5139	859.6923077	0.033032249	-0.051388202	20	0	2	43.6691	0		0.5216	35.70721322
505	2.5299	67.16	75.417	1.6519	-0.5138	860.974359	0.033037299	-0.051380402	20	0	2.0004	43.6694	0		0.524	35.76045989
506	2.5299	67.29	75.456	1.6521	-0.5136	862.6666667	0.033042949	-0.051363002	20	0	2	43.6695	0		0.5256	35.82968055
507	2.53	67.42	75.493	1.6525	-0.5135	864.3333333	0.033050499	-0.051353602	20	0	1.9996	43.6696	0		0.5288	35.89890121
508	2.5301	67.55	75.532	1.653	-0.5135	866.025641	0.033060599	-0.051348002	20	0	2.0008	43.6697	0		0.5328	35.96812188
509	2.5302	67.67	75.572	1.6532	-0.5134	867.5128205	0.033063749	-0.051335402	20	0	2.0004	43.6697	0		0.5344	36.03201787
510	2.5303	67.81	75.608	1.6536	-0.5133	869.4102564	0.033071299	-0.051332202	20	0	2.0004	43.6695	0		0.5376	36.1065632
511	2.5305	68.04	75.685	1.6542	-0.5131	872.3589744	0.033083899	-0.051307802	20	0	1.9996	43.6694	0		0.5424	36.22903053
512	2.5306	68.16	75.723	1.6546	-0.513	873.8205128	0.033092699	-0.051296002	20	0	2	43.6694	0		0.5456	36.29292653
513	2.5306	68.29	75.763	1.6549	-0.5129	875.5128205	0.033098349	-0.051288202	20	0	1.9996	43.6693	0		0.548	36.36214719
514	2.5307	68.42	75.799	1.6553	-0.5128	877.2051282	0.033105949	-0.051275602	20	0	2.0008	43.6691	0		0.5512	36.43136786
515	2.5308	68.55	75.838	1.6556	-0.5126	878.8717949	0.033111599	-0.051264602	20	0	2.0004	43.669	0		0.5536	36.50058852
516	2.5309	68.68	75.878	1.656	-0.5125	880.5641026	0.033119149	-0.051251802	20	0	2.0004	43.6688	0		0.5568	36.56980919
517	2.5311	68.91	75.953	1.6566	-0.5123	883.5128205	0.033132399	-0.051233802	20	0	2.0008	43.6685	0		0.5616	36.69227651
518	2.5312	69.05	75.99	1.657	-0.5123	885.2051282	0.033139949	-0.051225802	20	0	2	43.6683	0		0.5648	36.76682184
519	2.5312	69.18	76.029	1.6573	-0.5121	886.8974359	0.033146249	-0.051214802	20	0	2.0004	43.6682	0		0.5672	36.83604251
520	2.5313	69.29	76.068	1.6577	-0.512	888.3589744	0.033153799	-0.051203802	20	0	2.0004	43.6679	0		0.5704	36.89461384
521	2.5314	69.41	76.105	1.658	-0.512	889.8461538	0.033160099	-0.051197602	20	0	2.0004	43.6676	0		0.5728	36.95850984
522	2.5315	69.56	76.143	1.6583	-0.5118	891.7435897	0.033165149	-0.051181002	20	0	2.0004	43.6673	0		0.5752	37.03837983
523	2.5317	69.79	76.218	1.659	-0.5116	894.6923077	0.033180249	-0.051161202	20	0	2.0004	43.667	0		0.5808	37.16084716
524	2.5318	69.93	76.257	1.6594	-0.5116	896.5897436	0.033187799	-0.051156602	20	0	1.9996	43.6669	0		0.584	37.23539249
525	2.5319	70.05	76.296	1.6597	-0.5114	898.0512821	0.033194749	-0.051139202	20	0	2	43.6668	0		0.5864	37.29928849
526	2.532	70.28	76.372	1.6604	-0.5112	901	0.033207299	-0.051119402	20	0	1.9992	43.6665	0		0.592	37.42175582
527	2.5321	70.41	76.408	1.6608	-0.5111	902.6923077	0.033216149	-0.051113202	20	0	2.0004	43.6665	0		0.5952	37.49097648
528	2.5322	70.56	76.447	1.6612	-0.511	904.5897436	0.033223049	-0.051101402	20	0	2	43.6664	0		0.5984	37.57084648
529	2.5324	70.8	76.521	1.6618	-0.5108	907.7435897	0.033236299	-0.051078402	20	0	2.0004	43.6662	0		0.6032	37.69863847
530	2.5325	70.94	76.56	1.6622	-0.5107	909.4358974	0.033243849	-0.051069002	20	0	2	43.6662	0		0.6064	37.7731838
531	2.5325	71.05	76.599	1.6625	-0.5106	910.8974359	0.033249499	-0.051058002	20	0	2.0004	43.6662	0		0.6088	37.83175514
532	2.5326	71.17	76.635	1.6629	-0.5105	912.3846154	0.033258349	-0.051048602	20	0	2.0004	43.6661	0		0.612	37.89565113
533	2.5327	71.31	76.674	1.6632	-0.5104	914.2820513	0.033263999	-0.051039802	20	0	2	43.6657	0		0.6144	37.97019646
534	2.5328	71.43	76.711	1.6635	-0.5103	915.7435897	0.033270299	-0.051028002	20	0	2	43.6657	0		0.6168	38.03409246
535	2.5329	71.56	76.75	1.664	-0.5102	917.4358974	0.033279099	-0.051021802	20	0	2.0004	43.6654	0		0.6208	38.10331312
536	2.533	71.68	76.788	1.6643	-0.5101	918.9230769	0.033286049	-0.051008402	20	0	2	43.6652	0		0.6232	38.16720912
537	2.5331	71.79	76.824	1.6646	-0.51	920.3846154	0.033291699	-0.050998002	20	0	2	43.6652	0		0.6256	38.22578045
538	2.5332	71.92	76.863	1.6651	-0.5098	922.0769231	0.033301799	-0.050984602	20	0	1.9992	43.6652	0		0.6296	38.29500112
539	2.5332	72.04	76.899	1.6653	-0.5098	923.5384615	0.033305549	-0.050979202	20	0	2	43.6652	0		0.6312	38.35889711
540	2.5333	72.17	76.938	1.6657	-0.5097	925.2307692	0.033314399	-0.050966602	20	0	2	43.6652	0		0.6344	38.42811778
541	2.5334	72.3	76.977	1.6661	-0.5096	926.9230769	0.033321949	-0.050961802	20	0	2.0004	43.6654	0		0.6376	38.49733844
542	2.5335	72.41	77.013	1.6663	-0.5095	928.3846154	0.033326999	-0.050948402	20	0	1.9996	43.6655	0		0.6392	38.55590977
543	2.5336	72.55	77.052	1.6666	-0.5093	930.0769231	0.033332649	-0.050933402	20	0	1.9996	43.6657	0		0.6416	38.6304551
544	2.5337	72.66	77.088	1.6671	-0.5092	931.5641026	0.033342099	-0.050923202	20	0	2	43.6659	0		0.6456	38.68902643
545	2.5338	72.79	77.126	1.6674	-0.5091	933.2307692	0.033347749	-0.050912202	20	0	1.9992	43.6661	0		0.648	38.7582471
546	2.5339	72.92	77.165	1.6678	-0.509	934.9230769	0.033355949	-0.050902802	20	0	1.9992	43.6663	0		0.6512	38.82746776
547	2.5339	73.07	77.203	1.6681	-0.5089	936.8205128	0.033362249	-0.050890802	20	0	1.9992	43.6665	0		0.6536	38.90733776
548	2.5341	73.3	77.278	1.6688	-0.5087	939.7692308	0.033376749	-0.050872002	20	0	2	43.6667	0		0.6592	39.02980509
549	2.5343	73.55	77.354	1.6696	-0.5084	942.9230769	0.033391199	-0.050842002	20	0	1.9996	43.6667	0		0.6656	39.16292175
550	2.5344	73.68	77.392	1.6699	-0.5084	944.6153846	0.033397499	-0.050841202	20	0	1.9996	43.667	0		0.668	39.23214241
551	2.5345	73.8	77.428	1.6703	-0.5083	946.1025641	0.033405699	-0.050829402	20	0	2.0004	43.6671	0		0.6712	39.29603841
552	2.5345	73.94	77.466	1.6706	-0.5082	948	0.033411999	-0.050817602	20	0	2	43.6672	0		0.6736	39.37058374
553	2.5346	74.06	77.502	1.6709	-0.5081	949.4615385	0.033418299	-0.050805802	20	0	1.9992	43.6673	0		0.676	39.43447974
554	2.5348	74.29	77.579	1.6717	-0.5078	952.4102564	0.033433399	-0.050779802	20	0	2	43.6673	0		0.6824	39.55694707
555	2.5349	74.42	77.615	1.672	-0.5077	954.1025641	0.033439099	-0.050772602	20	0	1.9996	43.6674	0		0.6848	39.62616773
556	2.535	74.55	77.653	1.6724	-0.5076	955.7948718	0.033447299	-0.050762402	20	0	2	43.6675	0		0.688	39.69538839
557	2.5352	74.8	77.728	1.6731	-0.5074	958.9487179	0.033461149	-0.050738002	20	0	2.0004	43.6675	0		0.6936	39.82850505
558	2.5352	74.91	77.766	1.6734	-0.5073	960.4358974	0.033468699	-0.050728602	20	0	2.0008	43.6676	0		0.696	39.88707639
559	2.5353	75.03	77.804	1.6738	-0.5071	961.8974359	0.033476249	-0.050714402	20	0	2	43.6679	0		0.6992	39.95097238
560	2.5354	75.16	77.84	1.6741	-0.5071	963.5897436	0.033481899	-0.050710402	20	0	2.0004	43.6678	0		0.7016	40.02019305
561	2.5355	75.29	77.878	1.6745	-0.507	965.2820513	0.033489449	-0.050697802	20	0	2	43.6678	0		0.7048	40.08941371
562	2.5356	75.41	77.914	1.6748	-0.5068	966.7435897	0.033495749	-0.050683602	20	0	1.9996	43.6678	0		0.7072	40.15330971
563	2.5357	75.54	77.952	1.6752	-0.5068	968.4358974	0.033503949	-0.050678002	20	0	2	43.6678	0		0.7104	40.22253037
564	2.5358	75.65	77.99	1.6755	-0.5066	969.8974359	0.033509649	-0.050658402	20	0	1.9992	43.668	0		0.7128	40.2811017
565	2.5358	75.78	78.026	1.676	-0.5065	971.5897436	0.033520349	-0.050654402	20	0	1.9996	43.6684	0		0.7168	40.35032237
566	2.5359	75.93	78.064	1.6763	-0.5064	973.4871795	0.033525349	-0.050639402	20	0	1.9996	43.6687	0		0.7192	40.43019236
567	2.536	76.05	78.099	1.6766	-0.5063	974.974359	0.033531049	-0.050629202	20	0	1.9996	43.6688	0		0.7216	40.49408836
568	2.5361	76.16	78.138	1.6769	-0.5062	976.4358974	0.033538599	-0.050618202	20	0	2	43.6689	0		0.724	40.55265969
569	2.5362	76.29	78.176	1.6773	-0.5061	978.1282051	0.033546149	-0.050611002	20	0	2	43.6689	0		0.7272	40.62188036
570	2.5363	76.43	78.211	1.6777	-0.506	979.8205128	0.033554949	-0.050598402	20	0	1.9996	43.6688	0		0.7304	40.69642569
571	2.5364	76.54	78.249	1.6779	-0.5059	981.2820513	0.033558099	-0.050589002	20	0	2.0004	43.6688	0		0.732	40.75499702
572	2.5365	76.67	78.285	1.6783	-0.5058	982.974359	0.033566949	-0.050578802	20	0	1.9996	43.6688	0		0.7352	40.82421768
573	2.5365	76.8	78.323	1.6787	-0.5057	984.6666667	0.033574499	-0.050567802	20	0	2	43.6688	0		0.7384	40.89343834
574	2.5366	76.92	78.361	1.679	-0.5055	986.1282051	0.033580799	-0.050549602	20	0	2.0004	43.6688	0		0.7408	40.95733434
575	2.5368	77.16	78.435	1.6798	-0.5053	989.2820513	0.033595299	-0.050527602	20	0	1.9996	43.6688	0		0.7472	41.08512634
576	2.5369	77.28	78.473	1.6801	-0.5052	990.7692308	0.033602849	-0.050522002	20	0	1.9996	43.6687	0		0.7496	41.14902233
577	2.537	77.43	78.509	1.6805	-0.5051	992.6666667	0.033609749	-0.050508602	20	0	1.9996	43.6687	0		0.7528	41.22889233
578	2.5371	77.54	78.546	1.6808	-0.5049	994.1282051	0.033616049	-0.050493602	20	0	2.0004	43.6687	0		0.7552	41.28746366
579	2.5371	77.67	78.585	1.6811	-0.5048	995.8205128	0.033622349	-0.050481002	20	0	2.0004	43.6687	0		0.7576	41.35668433
580	2.5372	77.82	78.619	1.6816	-0.5047	997.7179487	0.033631199	-0.050473202	20	0	2.0004	43.6687	0		0.7616	41.43655432
581	2.5374	78.04	78.693	1.6822	-0.5045	1000.461538	0.033643749	-0.050453402	20	0	2.0004	43.6686	0		0.7664	41.55369698
582	2.5375	78.17	78.73	1.6826	-0.5044	1002.153846	0.033652599	-0.050436002	20	0	2	43.6685	0		0.7696	41.62291765
583	2.5376	78.3	78.768	1.683	-0.5043	1003.820513	0.033659499	-0.050426602	20	0	2	43.6684	0		0.7728	41.69213831
584	2.5377	78.43	78.804	1.6834	-0.5042	1005.512821	0.033668349	-0.050415602	20	0	2	43.6684	0		0.776	41.76135898
585	2.5378	78.55	78.841	1.6837	-0.5041	1007	0.033673349	-0.050407002	20	0	2	43.6683	0		0.7784	41.82525497
586	2.5378	78.68	78.879	1.6841	-0.5039	1008.666667	0.033681549	-0.050392802	20	0	2.0004	43.6682	0		0.7816	41.89447564
587	2.5379	78.82	78.915	1.6845	-0.5038	1010.564103	0.033689749	-0.050383202	20	0	2.0004	43.6681	0		0.7848	41.96902097
588	2.538	78.92	78.952	1.6848	-0.5037	1011.846154	0.033695399	-0.050369002	20	0	2.0004	43.6679	0		0.7872	42.02226763
589	2.5381	79.05	78.987	1.6851	-0.5036	1013.512821	0.033702949	-0.050363602	20	0	2.0004	43.6677	0		0.7896	42.0914883
590	2.5382	79.19	79.025	1.6855	-0.5035	1015.205128	0.033709249	-0.050345402	20	0	2.0004	43.6673	0		0.7928	42.16603363
591	2.5383	79.32	79.063	1.6858	-0.5033	1016.897436	0.033716849	-0.050330402	20	0	2.0008	43.6668	0		0.7952	42.23525429
592	2.5384	79.43	79.098	1.6862	-0.5032	1018.358974	0.033724399	-0.050323402	20	0	2.0004	43.6663	0		0.7984	42.29382562
593	2.5385	79.56	79.136	1.6866	-0.5031	1020.051282	0.033732549	-0.050314002	20	0	2.0004	43.6659	0		0.8016	42.36304628
594	2.5386	79.79	79.208	1.6873	-0.5029	1023	0.033745149	-0.050291802	20	0	2	43.6649	0		0.8072	42.48551361
595	2.5387	79.93	79.246	1.6876	-0.5027	1024.692308	0.033752099	-0.050273802	20	0	2.0008	43.6645	0		0.8096	42.56005894
596	2.5388	80.04	79.281	1.688	-0.5027	1026.153846	0.033760299	-0.050269002	20	0	2	43.6641	0		0.8128	42.61863027
597	2.5389	80.16	79.318	1.6884	-0.5026	1027.641026	0.033767849	-0.050258002	20	0	2.0004	43.6637	0		0.816	42.68252627
598	2.539	80.3	79.356	1.6888	-0.5024	1029.538462	0.033775399	-0.050242202	20	0	1.9996	43.6634	0		0.8192	42.7570716
599	2.5391	80.42	79.391	1.6891	-0.5023	1031	0.033782949	-0.050228802	20	0	1.9996	43.6632	0		0.8216	42.8209676
600	2.5391	80.55	79.429	1.6895	-0.5022	1032.692308	0.033789899	-0.050216202	20	0	2.0004	43.663	0		0.8248	42.89018826
601	2.5392	80.67	79.464	1.6899	-0.5021	1034.179487	0.033797449	-0.050205202	20	0	2	43.6628	0		0.828	42.95408426
602	2.5393	80.8	79.502	1.6902	-0.502	1035.846154	0.033804349	-0.050195602	20	0	2.0004	43.6628	0		0.8304	43.02330492
603	2.5394	80.93	79.539	1.6906	-0.5018	1037.538462	0.033812549	-0.050181402	20	0	2	43.6628	0		0.8336	43.09252559
604	2.5395	81.04	79.574	1.691	-0.5018	1039.025641	0.033819499	-0.050176802	20	0	2	43.6627	0		0.8368	43.15109692
605	2.5396	81.19	79.612	1.6912	-0.5015	1040.923077	0.033824549	-0.050153802	20	0	2	43.6625	0		0.8384	43.23096692
606	2.5398	81.44	79.684	1.692	-0.5014	1044.076923	0.033840249	-0.050137402	20	0	2	43.6625	0		0.8448	43.36408358
607	2.5398	81.55	79.721	1.6924	-0.5012	1045.538462	0.033847849	-0.050119202	20	0	1.9996	43.6625	0		0.848	43.42265491
608	2.5399	81.67	79.756	1.6927	-0.5011	1047.025641	0.033854749	-0.050112202	20	0	1.9996	43.6625	0		0.8504	43.48655091
609	2.54	81.8	79.793	1.6932	-0.5011	1048.717949	0.033863549	-0.050105002	20	0	1.9996	43.6626	0		0.8544	43.55577157
610	2.5401	81.93	79.831	1.6936	-0.5009	1050.384615	0.033871149	-0.050090802	20	0	1.9996	43.6627	0		0.8576	43.62499223
611	2.5402	82.05	79.869	1.6938	-0.5008	1051.871795	0.033876799	-0.050080602	20	0	1.9996	43.6628	0		0.8592	43.68888823
612	2.5403	82.16	79.904	1.6942	-0.5007	1053.358974	0.033883099	-0.050068002	20	0	1.9992	43.663	0		0.8624	43.74745956
613	2.5404	82.29	79.941	1.6947	-0.5005	1055.025641	0.033893149	-0.050054602	20	0	1.9996	43.6632	0		0.8664	43.81668023
614	2.5404	82.42	79.977	1.6949	-0.5003	1056.717949	0.033898849	-0.050033202	20	0	1.9996	43.6635	0		0.868	43.88590089
615	2.5405	82.54	80.014	1.6953	-0.5003	1058.205128	0.033905749	-0.050034002	20	0	1.9996	43.6635	0		0.8712	43.94979689
616	2.5406	82.67	80.051	1.6957	-0.5002	1059.871795	0.033914599	-0.050015202	20	0	2	43.6635	0		0.8744	44.01901755
617	2.5407	82.8	80.086	1.696	-0.5	1061.564103	0.033920899	-0.050003402	20	0	1.9996	43.6637	0		0.8768	44.08823822
618	2.5408	82.92	80.123	1.6964	-0.4999	1063.051282	0.033927799	-0.049987602	20	0	2	43.6638	0		0.88	44.15213421
619	2.5409	83.07	80.157	1.6967	-0.4998	1064.948718	0.033934749	-0.049979602	20	0	2	43.6642	0		0.8824	44.23200421
620	2.5411	83.31	80.232	1.6974	-0.4996	1068.102564	0.033947949	-0.049955202	20	0	2	43.6646	0		0.888	44.3597962
621	2.5411	83.44	80.266	1.6978	-0.4994	1069.794872	0.033956799	-0.049943402	20	0	1.9996	43.6648	0		0.8912	44.42901687
622	2.5413	83.71	80.34	1.6986	-0.4992	1073.153846	0.033971249	-0.049916602	20	0	1.9996	43.6653	0		0.8976	44.57278286
623	2.5415	83.92	80.411	1.6993	-0.499	1075.897436	0.033985749	-0.049902402	20	0	1.9996	43.6657	0		0.9032	44.68460086
624	2.5416	84.05	80.446	1.6996	-0.4988	1077.589744	0.033992699	-0.049884402	20	0	1.9996	43.6661	0		0.9056	44.75382152
625	2.5417	84.18	80.482	1.6999	-0.4987	1079.25641	0.033998999	-0.049871802	20	0	2	43.6665	0		0.908	44.82304219
626	2.5417	84.3	80.519	1.7004	-0.4987	1080.74359	0.034007799	-0.049866202	20	0	2	43.6666	0		0.912	44.88693818
627	2.5418	84.43	80.554	1.7008	-0.4985	1082.435897	0.034015349	-0.049852802	20	0	1.9996	43.6668	0		0.9152	44.95615885
628	2.5419	84.54	80.591	1.701	-0.4986	1083.897436	0.034020999	-0.049857602	20	0	2.0008	43.6669	0		0.9168	45.01473018
629	2.542	84.66	80.625	1.7015	-0.4985	1085.384615	0.034029199	-0.049853602	20	0	1.9996	43.667	0		0.9208	45.07862618
630	2.5421	84.79	80.662	1.7018	-0.4984	1087.051282	0.034036149	-0.049844202	20	0	2.0004	43.6672	0		0.9232	45.14784684
631	2.5422	84.94	80.699	1.7022	-0.4983	1088.948718	0.034043049	-0.049834602	20	0	1.9996	43.6673	0		0.9264	45.22771684
632	2.5423	85.07	80.736	1.7026	-0.4983	1090.641026	0.034051899	-0.049827602	20	0	2	43.6673	0		0.9296	45.2969375
633	2.5424	85.33	80.808	1.7033	-0.4976	1094.025641	0.034066349	-0.049764602	20	0	2	43.6674	0		0.9352	45.43537883
634	2.5426	85.55	80.879	1.7041	-0.4976	1096.74359	0.034081499	-0.049756602	20	0	2.0004	43.6676	0		0.9416	45.55252149
635	2.5427	85.71	80.915	1.7044	-0.4972	1098.871795	0.034087149	-0.049722002	20	0	1.9996	43.6675	0		0.944	45.63771615
636	2.5429	85.94	80.987	1.7051	-0.4973	1101.820513	0.034102249	-0.049728202	20	0	2	43.6673	0		0.9496	45.76018348
637	2.543	86.06	81.022	1.7056	-0.4969	1103.282051	0.034111699	-0.049691202	20	0	2.0004	43.6672	0		0.9536	45.82407948
638	2.5431	86.19	81.058	1.7059	-0.497	1104.974359	0.034117399	-0.049698202	20	0	2	43.6671	0		0.956	45.89330014
639	2.5431	86.32	81.095	1.7063	-0.4966	1106.666667	0.034125549	-0.049662002	20	0	2	43.6671	0		0.9592	45.96252081
640	2.5432	86.45	81.129	1.7066	-0.4965	1108.333333	0.034131849	-0.049649402	20	0	1.9996	43.667	0		0.9616	46.03174147
641	2.5434	86.7	81.202	1.7074	-0.4963	1111.512821	0.034148849	-0.049625002	20	0	2.0004	43.6667	0		0.968	46.16485813
642	2.5435	86.81	81.237	1.7078	-0.4965	1112.974359	0.034155149	-0.049654202	20	0	2.0008	43.6663	0		0.9712	46.22342946
643	2.5436	86.93	81.274	1.7082	-0.496	1114.461538	0.034163999	-0.049599002	20	0	2.0004	43.6661	0		0.9744	46.28732546
644	2.5437	87.06	81.31	1.7086	-0.4959	1116.128205	0.034171549	-0.049590402	20	0	2.0008	43.6657	0		0.9776	46.35654612
645	2.5437	87.19	81.344	1.7088	-0.4958	1117.820513	0.034176599	-0.049577602	20	0	2	43.6654	0		0.9792	46.42576679
646	2.5439	87.44	81.417	1.7096	-0.4955	1120.974359	0.034192949	-0.049551602	20	0	2.0012	43.6646	0		0.9856	46.55888345
647	2.544	87.55	81.453	1.71	-0.4954	1122.461538	0.034200499	-0.049535202	20	0	2	43.6645	0		0.9888	46.61745478
648	2.5441	87.72	81.489	1.7104	-0.4953	1124.564103	0.034207449	-0.049528002	20	0	2.0004	43.6644	0		0.992	46.70797411
649	2.5443	87.93	81.559	1.7112	-0.495	1127.307692	0.034223199	-0.049498002	20	0	1.9996	43.6639	0		0.9984	46.8197921
650	2.5444	88.06	81.596	1.7116	-0.4949	1129	0.034231349	-0.049487002	20	0	2.0004	43.6636	0		1.0016	46.88901277
651	2.5444	88.19	81.631	1.7119	-0.4948	1130.666667	0.034237649	-0.049479202	20	0	2	43.6634	0		1.004	46.95823343
652	2.5445	88.31	81.667	1.7124	-0.4946	1132.153846	0.034247099	-0.049461802	20	0	1.9996	43.6631	0		1.008	47.02212943
653	2.5447	88.55	81.738	1.713	-0.4944	1135.307692	0.034259099	-0.049435002	20	0	2.0012	43.6627	0		1.0128	47.14992142
654	2.5448	88.69	81.772	1.7134	-0.4943	1137	0.034267249	-0.049427202	20	0	2.0004	43.6623	0		1.016	47.22446675
655	2.5449	88.82	81.809	1.7136	-0.4941	1138.692308	0.034272949	-0.049409802	20	0	2.0004	43.662	0		1.0176	47.29368742
656	2.545	88.95	81.846	1.7141	-0.494	1140.358974	0.034281749	-0.049401202	20	0	2.0004	43.6616	0		1.0216	47.36290808
657	2.545	89.06	81.88	1.7145	-0.4939	1141.846154	0.034289299	-0.049386202	20	0	2.0012	43.6615	0		1.0248	47.42147941
658	2.5451	89.2	81.916	1.7148	-0.4939	1143.538462	0.034296849	-0.049390202	20	0	1.9996	43.6613	0		1.0272	47.49602474
659	2.5452	89.33	81.952	1.7153	-0.4937	1145.205128	0.034305049	-0.049370402	20	0	2.0004	43.6613	0		1.0312	47.56524541
660	2.5454	89.59	82.023	1.7159	-0.4934	1148.589744	0.034318899	-0.049342802	20	0	2.0004	43.6612	0		1.036	47.70368674
661	2.5456	89.8	82.093	1.7167	-0.4931	1151.333333	0.034333399	-0.049310402	20	0	2	43.6612	0		1.0424	47.81550473
662	2.5457	89.95	82.129	1.717	-0.493	1153.230769	0.034340949	-0.049297002	20	0	1.9996	43.6612	0		1.0448	47.89537473
663	2.5458	90.18	82.2	1.7178	-0.493	1156.179487	0.034355449	-0.049301802	20	0	2	43.6613	0		1.0512	48.01784206
664	2.5459	90.31	82.237	1.7181	-0.4929	1157.846154	0.034362349	-0.049292402	20	0	1.9996	43.6614	0		1.0536	48.08706272
665	2.546	90.41	82.272	1.7186	-0.4927	1159.128205	0.034371199	-0.049269602	20	0	2	43.6616	0		1.0576	48.14030938
666	2.5461	90.58	82.308	1.719	-0.4923	1161.230769	0.034379399	-0.049231602	20	0	1.9996	43.662	0		1.0608	48.23082871
667	2.5463	90.79	82.378	1.7197	-0.492	1163.974359	0.034393849	-0.049204802	20	0	1.9996	43.6624	0		1.0664	48.34264671
668	2.5463	90.92	82.415	1.7201	-0.4919	1165.666667	0.034401399	-0.049192202	20	0	2	43.6627	0		1.0696	48.41186737
669	2.5464	91.09	82.451	1.7205	-0.4918	1167.769231	0.034409599	-0.049178802	20	0	2	43.6627	0		1.0728	48.5023867
670	2.5466	91.3	82.522	1.7212	-0.4915	1170.512821	0.034424099	-0.049154402	20	0	2	43.6627	0		1.0784	48.6142047
671	2.5467	91.43	82.556	1.7215	-0.4915	1172.179487	0.034430999	-0.049147402	20	0	2.0004	43.6627	0		1.0808	48.68342536
672	2.5468	91.56	82.593	1.7219	-0.4912	1173.871795	0.034438599	-0.049122802	20	0	2.0004	43.6627	0		1.084	48.75264603
673	2.5469	91.69	82.629	1.7223	-0.4912	1175.564103	0.034446149	-0.049115002	20	0	1.9996	43.6627	0		1.0872	48.82186669
674	2.547	91.94	82.699	1.723	-0.4909	1178.717949	0.034460599	-0.049088202	20	0	2	43.6627	0		1.0928	48.95498335
675	2.5471	92.06	82.736	1.7235	-0.4907	1180.205128	0.034469449	-0.049072402	20	0	2	43.6627	0		1.0968	49.01887935
676	2.5472	92.17	82.771	1.7237	-0.4906	1181.666667	0.034474499	-0.049059002	20	0	2	43.6627	0		1.0984	49.07745068
677	2.5473	92.32	82.807	1.7242	-0.4905	1183.564103	0.034483299	-0.049048802	20	0	2	43.6629	0		1.1024	49.15732068
678	2.5474	92.45	82.84	1.7245	-0.4904	1185.25641	0.034490849	-0.049044002	20	0	2.0008	43.663	0		1.1048	49.22654134
679	2.5476	92.66	82.91	1.7253	-0.4901	1188	0.034506599	-0.049005402	20	0	2	43.6632	0		1.1112	49.33835934
680	2.5477	92.81	82.946	1.7257	-0.49	1189.897436	0.034513499	-0.048995202	20	0	2	43.6632	0		1.1144	49.41822933
681	2.5477	92.93	82.982	1.7261	-0.4898	1191.358974	0.034522349	-0.048981002	20	0	2	43.6632	0		1.1176	49.48212533
682	2.5478	93.06	83.016	1.7265	-0.4898	1193.051282	0.034529249	-0.048976202	20	0	2.0004	43.6633	0		1.1208	49.55134599
683	2.5479	93.21	83.053	1.7268	-0.4896	1194.948718	0.034536849	-0.048960602	20	0	1.9996	43.6633	0		1.1232	49.63121599
684	2.5481	93.44	83.123	1.7276	-0.4893	1197.897436	0.034551299	-0.048929802	20	0	1.9996	43.6634	0		1.1296	49.75368332
685	2.5482	93.55	83.16	1.728	-0.4892	1199.358974	0.034559499	-0.048918002	20	0	2	43.6634	0		1.1328	49.81225465
686	2.5483	93.68	83.194	1.7284	-0.4891	1201.051282	0.034567049	-0.048909202	20	0	1.9996	43.6634	0		1.136	49.88147531
687	2.5483	93.81	83.23	1.7288	-0.4889	1202.74359	0.034576499	-0.048892002	20	0	2	43.6634	0		1.1392	49.95069598
688	2.5484	93.93	83.266	1.7291	-0.4887	1204.205128	0.034582799	-0.048874602	20	0	1.9992	43.6635	0		1.1416	50.01459198
689	2.5485	94.08	83.302	1.7295	-0.4887	1206.102564	0.034589749	-0.048866002	20	0	1.9992	43.6637	0		1.1448	50.09446197
690	2.5486	94.19	83.336	1.73	-0.4885	1207.589744	0.034599199	-0.048854202	20	0	2	43.6637	0		1.1488	50.1530333
691	2.5488	94.42	83.405	1.7307	-0.4882	1210.538462	0.034613049	-0.048823402	20	0	2	43.6639	0		1.1544	50.27550063
692	2.5489	94.55	83.441	1.731	-0.4881	1212.230769	0.034619949	-0.048811602	20	0	1.9996	43.6639	0		1.1568	50.3447213
693	2.549	94.68	83.478	1.7314	-0.488	1213.897436	0.034628799	-0.048796602	20	0	2.0004	43.6639	0		1.16	50.41394196
694	2.549	94.8	83.511	1.7318	-0.4878	1215.384615	0.034636949	-0.048783202	20	0	1.9996	43.6639	0		1.1632	50.47783796
695	2.5491	94.95	83.546	1.7322	-0.4878	1217.282051	0.034643899	-0.048778402	20	0	1.9992	43.6639	0		1.1664	50.55770795
696	2.5492	95.06	83.58	1.7325	-0.4877	1218.74359	0.034650799	-0.048765002	20	0	2.0004	43.6639	0		1.1688	50.61627928
697	2.5493	95.18	83.616	1.7329	-0.4876	1220.230769	0.034658999	-0.048758002	20	0	2.0004	43.6639	0		1.172	50.68017528
698	2.5494	95.31	83.652	1.7334	-0.4874	1221.923077	0.034667799	-0.048742202	20	0	2.0008	43.6639	0		1.176	50.74939595
699	2.5495	95.42	83.686	1.7338	-0.4873	1223.384615	0.034675399	-0.048734202	20	0	1.9996	43.6639	0		1.1792	50.80796728
700	2.5496	95.59	83.723	1.7342	-0.4871	1225.487179	0.034683549	-0.048712202	20	0	2	43.6639	0		1.1824	50.89848661
701	2.5497	95.8	83.791	1.7349	-0.4868	1228.230769	0.034698699	-0.048679202	20	0	2	43.6638	0		1.188	51.0103046
702	2.5498	95.93	83.827	1.7353	-0.4866	1229.923077	0.034706849	-0.048661802	20	0	2	43.6637	0		1.1912	51.07952527
703	2.5499	96.07	83.863	1.7356	-0.4865	1231.615385	0.034712549	-0.048646002	20	0	2	43.6637	0		1.1936	51.1540706
704	2.55	96.18	83.897	1.7361	-0.4864	1233.076923	0.034721349	-0.048635802	20	0	1.9996	43.6636	0		1.1976	51.21264193
705	2.5501	96.31	83.932	1.7364	-0.4862	1234.769231	0.034728899	-0.048616802	20	0	1.9996	43.6636	0		1.2	51.28186259
706	2.5502	96.44	83.966	1.7369	-0.4861	1236.461538	0.034737099	-0.048607402	20	0	2	43.6636	0		1.204	51.35108325
707	2.5503	96.56	84.002	1.7372	-0.4859	1237.923077	0.034744649	-0.048593202	20	0	2.0004	43.6635	0		1.2064	51.41497925
708	2.5503	96.69	84.035	1.7375	-0.4858	1239.615385	0.034750949	-0.048578202	20	0	2.0004	43.6633	0		1.2088	51.48419992
709	2.5504	96.84	84.07	1.7379	-0.4857	1241.512821	0.034757249	-0.048571202	20	0	2.0004	43.6631	0		1.212	51.56406991
710	2.5506	97.07	84.139	1.7387	-0.4854	1244.461538	0.034774899	-0.048543602	20	0	2	43.6628	0		1.2184	51.68653724
711	2.5507	97.18	84.174	1.7391	-0.4852	1245.923077	0.034781799	-0.048524602	20	0	2.0008	43.6626	0		1.2216	51.74510857
712	2.5508	97.3	84.209	1.7395	-0.4851	1247.410256	0.034790649	-0.048508002	20	0	1.9996	43.6622	0		1.2248	51.80900457
713	2.5509	97.43	84.243	1.7398	-0.485	1249.102564	0.034796949	-0.048495402	20	0	1.9996	43.6622	0		1.2272	51.87822523
714	2.551	97.56	84.28	1.7403	-0.4848	1250.769231	0.034805749	-0.048479802	20	0	2	43.6621	0		1.2312	51.9474459
715	2.551	97.68	84.316	1.7407	-0.4847	1252.25641	0.034814549	-0.048470202	20	0	2	43.6619	0		1.2344	52.01134189
716	2.5511	97.81	84.35	1.741	-0.4846	1253.948718	0.034820849	-0.048455202	20	0	1.9996	43.6618	0		1.2368	52.08056256
717	2.5512	97.94	84.385	1.7415	-0.4844	1255.615385	0.034829049	-0.048443402	20	0	2.0008	43.6614	0		1.2408	52.14978322
718	2.5513	98.07	84.42	1.7419	-0.4843	1257.307692	0.034837249	-0.048425402	20	0	2.0004	43.6612	0		1.244	52.21900389
719	2.5514	98.19	84.454	1.7422	-0.4841	1258.794872	0.034844799	-0.048413402	20	0	1.9996	43.661	0		1.2464	52.28289988
720	2.5515	98.33	84.49	1.7427	-0.484	1260.692308	0.034854249	-0.048397802	20	0	2	43.6608	0		1.2504	52.35744521
721	2.5516	98.56	84.559	1.7434	-0.4837	1263.641026	0.034867449	-0.048374002	20	0	2.0004	43.6606	0		1.256	52.47991254
722	2.5517	98.7	84.595	1.7437	-0.4836	1265.333333	0.034874399	-0.048356802	20	0	2.0004	43.6605	0		1.2584	52.55445787
723	2.5519	98.96	84.665	1.7445	-0.4833	1268.692308	0.034890749	-0.048331602	20	0	2	43.6603	0		1.2648	52.6928992
724	2.5521	99.16	84.733	1.7453	-0.483	1271.230769	0.034906499	-0.048303202	20	0	1.9996	43.6603	0		1.2712	52.79939253
725	2.5522	99.3	84.769	1.7457	-0.483	1273.128205	0.034914699	-0.048295202	20	0	2.0004	43.6603	0		1.2744	52.87393786
726	2.5523	99.43	84.802	1.746	-0.4828	1274.794872	0.034920999	-0.048282602	20	0	2	43.6602	0		1.2768	52.94315852
727	2.5523	99.55	84.838	1.7465	-0.4827	1276.282051	0.034929199	-0.048274802	20	0	1.9992	43.6602	0		1.2808	53.00705452
728	2.5524	99.7	84.874	1.7469	-0.4827	1278.179487	0.034937999	-0.048266802	20	0	2	43.6602	0		1.284	53.08692452
729	2.5525	99.81	84.907	1.7472	-0.4824	1279.641026	0.034944949	-0.048244002	20	0	2	43.6602	0		1.2864	53.14549585
730	2.5526	99.93	84.942	1.7476	-0.4822	1281.128205	0.034951249	-0.048219602	20	0	1.9996	43.6602	0		1.2896	53.20939185
731	2.5527	100.06	84.975	1.748	-0.4821	1282.820513	0.034960699	-0.048214802	20	0	2.0004	43.6602	0		1.2928	53.27861251
732	2.5528	100.19	85.011	1.7484	-0.4821	1284.487179	0.034967599	-0.048205402	20	0	1.9988	43.6602	0		1.296	53.34783317
733	2.5529	100.32	85.046	1.7487	-0.4818	1286.179487	0.034973299	-0.048175402	20	0	1.9992	43.6602	0		1.2984	53.41705384
734	2.553	100.55	85.115	1.7495	-0.4815	1289.128205	0.034990899	-0.048146202	20	0	1.9996	43.6604	0		1.3048	53.53952117
735	2.5531	100.7	85.151	1.75	-0.4813	1291.025641	0.035000349	-0.048132002	20	0	1.9996	43.6605	0		1.3088	53.61939116
736	2.5532	100.83	85.184	1.7503	-0.4812	1292.717949	0.035006649	-0.048121002	20	0	1.9996	43.6608	0		1.3112	53.68861183
737	2.5533	100.95	85.22	1.7507	-0.4811	1294.179487	0.035014849	-0.048107602	20	0	2	43.661	0		1.3144	53.75250782
738	2.5534	101.08	85.255	1.7511	-0.4809	1295.871795	0.035021149	-0.048091802	20	0	1.9996	43.661	0		1.3176	53.82172849
739	2.5536	101.32	85.325	1.7519	-0.4806	1299.025641	0.035038149	-0.048056402	20	0	2	43.661	0		1.324	53.94952048
740	2.5536	101.46	85.358	1.7523	-0.4805	1300.717949	0.035045049	-0.048051602	20	0	2	43.661	0		1.3272	54.02406581
741	2.5538	101.72	85.429	1.753	-0.4802	1304.102564	0.035060799	-0.048021002	20	0	2	43.6612	0		1.3328	54.16250714
742	2.5539	101.83	85.462	1.7534	-0.4801	1305.564103	0.035068999	-0.048005202	20	0	2	43.6612	0		1.336	54.22107847
743	2.5541	102.05	85.531	1.7542	-0.4798	1308.307692	0.035084749	-0.047978402	20	0	2	43.6612	0		1.3424	54.33822113
744	2.5542	102.18	85.567	1.7547	-0.4797	1310	0.035093549	-0.047967402	20	0	2	43.6612	0		1.3464	54.4074418
745	2.5542	102.31	85.603	1.755	-0.4795	1311.666667	0.035099249	-0.047946802	20	0	2.0004	43.6612	0		1.3488	54.47666246
746	2.5543	102.44	85.636	1.7554	-0.4793	1313.358974	0.035107399	-0.047934202	20	0	2	43.6612	0		1.352	54.54588313
747	2.5544	102.57	85.671	1.7559	-0.4792	1315.051282	0.035117499	-0.047918402	20	0	2	43.6612	0		1.356	54.61510379
748	2.5546	102.8	85.739	1.7566	-0.4789	1318	0.035131999	-0.047892402	20	0	2.0008	43.6611	0		1.3616	54.73757112
749	2.5547	102.95	85.775	1.757	-0.4788	1319.897436	0.035140799	-0.047876802	20	0	1.9996	43.6609	0		1.3648	54.81744111
750	2.5548	103.07	85.808	1.7574	-0.4787	1321.358974	0.035147749	-0.047866402	20	0	2	43.6608	0		1.368	54.88133711
751	2.5549	103.18	85.843	1.7577	-0.4785	1322.846154	0.035153399	-0.047849202	20	0	2.0004	43.6605	0		1.3704	54.93990844
752	2.5549	103.33	85.878	1.7582	-0.4783	1324.74359	0.035164099	-0.047834202	20	0	2.0004	43.6604	0		1.3744	55.01977844
753	2.555	103.44	85.911	1.7585	-0.4784	1326.205128	0.035169149	-0.047835002	20	0	2	43.6602	0		1.3768	55.07834977
754	2.5551	103.56	85.946	1.7589	-0.4782	1327.692308	0.035177949	-0.047815202	20	0	1.9996	43.6601	0		1.38	55.14224577
755	2.5552	103.71	85.982	1.7593	-0.4779	1329.589744	0.035186799	-0.047793202	20	0	2.0004	43.6601	0		1.3832	55.22211576
756	2.5553	103.82	86.015	1.7597	-0.4778	1331.051282	0.035194349	-0.047784402	20	0	2.0004	43.6599	0		1.3864	55.2806871
757	2.5555	104.05	86.083	1.7605	-0.4775	1334	0.035210099	-0.047747402	20	0	2	43.6596	0		1.3928	55.40315442
758	2.5556	104.18	86.118	1.7609	-0.4773	1335.692308	0.035218249	-0.047733202	20	0	2.0004	43.6595	0		1.396	55.47237509
759	2.5556	104.32	86.153	1.7613	-0.4772	1337.384615	0.035226449	-0.047720602	20	0	2	43.6595	0		1.3992	55.54692042
760	2.5558	104.56	86.222	1.7621	-0.4769	1340.538462	0.035242199	-0.047688402	20	0	1.9992	43.6595	0		1.4056	55.67471241
761	2.5559	104.71	86.257	1.7625	-0.4767	1342.435897	0.035249749	-0.047673402	20	0	1.9996	43.6595	0		1.4088	55.75458241
762	2.556	104.83	86.29	1.7629	-0.4766	1343.923077	0.035257949	-0.047661602	20	0	1.9996	43.6596	0		1.412	55.81847841
763	2.5561	104.96	86.325	1.7632	-0.4764	1345.589744	0.035264849	-0.047642602	20	0	2	43.6598	0		1.4144	55.88769907
764	2.5562	105.19	86.394	1.7641	-0.4762	1348.538462	0.035281249	-0.047617402	20	0	2	43.66	0		1.4216	56.0101664
765	2.5563	105.33	86.43	1.7644	-0.476	1350.435897	0.035288799	-0.047601602	20	0	2	43.66	0		1.424	56.08471173
766	2.5564	105.45	86.463	1.7648	-0.4758	1351.923077	0.035296349	-0.047582802	20	0	2.0004	43.66	0		1.4272	56.14860773
767	2.5565	105.56	86.499	1.7653	-0.4758	1353.384615	0.035305199	-0.047578802	20	0	2	43.6599	0		1.4312	56.20717906
768	2.5566	105.68	86.535	1.7657	-0.4756	1354.871795	0.035313999	-0.047556002	20	0	2	43.6597	0		1.4344	56.27107506
769	2.5567	105.83	86.567	1.766	-0.4755	1356.769231	0.035320299	-0.047546402	20	0	1.9996	43.6595	0		1.4368	56.35094505
770	2.5568	105.94	86.602	1.7665	-0.4754	1358.230769	0.035329749	-0.047535402	20	0	2.0004	43.6594	0		1.4408	56.40951638
771	2.5569	106.06	86.635	1.7669	-0.4751	1359.717949	0.035338549	-0.047513402	20	0	2.0004	43.6592	0		1.444	56.47341238
772	2.5569	106.21	86.67	1.7672	-0.475	1361.615385	0.035344249	-0.047499202	20	0	2	43.6591	0		1.4464	56.55328238
773	2.557	106.32	86.705	1.7677	-0.4749	1363.102564	0.035353649	-0.047489602	20	0	2	43.659	0		1.4504	56.61185371
774	2.5571	106.47	86.737	1.7681	-0.475	1364.974359	0.035361249	-0.047504602	20	0	2.0004	43.6588	0		1.4536	56.6917237
775	2.5573	106.67	86.807	1.7688	-0.4748	1367.512821	0.035376999	-0.047480202	20	0	2	43.6585	0		1.4592	56.79821703
776	2.5574	106.83	86.84	1.7692	-0.4746	1369.615385	0.035383249	-0.047455002	20	0	2.0008	43.6585	0		1.4624	56.8834117
777	2.5575	106.95	86.876	1.7696	-0.4743	1371.102564	0.035391449	-0.047425002	20	0	2	43.6585	0		1.4656	56.94730769
778	2.5575	107.06	86.909	1.77	-0.4743	1372.564103	0.035400299	-0.047428202	20	0	2.0008	43.6585	0		1.4688	57.00587903
779	2.5576	107.19	86.944	1.7704	-0.474	1374.25641	0.035408449	-0.047396602	20	0	2.0004	43.6585	0		1.472	57.07509969
780	2.5577	107.31	86.98	1.7709	-0.4738	1375.74359	0.035417299	-0.047375402	20	0	2	43.6583	0		1.476	57.13899569
781	2.5578	107.42	87.013	1.7712	-0.4737	1377.205128	0.035424199	-0.047365202	20	0	1.9996	43.6582	0		1.4784	57.19756702
782	2.5579	107.59	87.048	1.7717	-0.4736	1379.307692	0.035433049	-0.047355602	20	0	2	43.6581	0		1.4824	57.28808635
783	2.558	107.69	87.083	1.7721	-0.4733	1380.589744	0.035441199	-0.047328802	20	0	1.9996	43.6582	0		1.4856	57.34133301
784	2.5581	107.83	87.116	1.7724	-0.4731	1382.487179	0.035448749	-0.047310002	20	0	2	43.6582	0		1.488	57.41587834
785	2.5582	107.95	87.151	1.7728	-0.4729	1383.948718	0.035456349	-0.047288602	20	0	1.9996	43.6583	0		1.4912	57.47977434
786	2.5582	108.08	87.186	1.7733	-0.4728	1385.641026	0.035465799	-0.047283202	20	0	1.9996	43.6583	0		1.4952	57.548995
787	2.5583	108.19	87.219	1.7736	-0.4728	1387.102564	0.035472699	-0.047280802	20	0	2	43.6585	0		1.4976	57.60756633
788	2.5584	108.33	87.254	1.774	-0.4726	1388.794872	0.035480249	-0.047261202	20	0	1.9996	43.6585	0		1.5008	57.68211166
789	2.5586	108.57	87.323	1.7748	-0.4722	1391.948718	0.035495399	-0.047220202	20	0	2	43.6585	0		1.5072	57.80990366
790	2.5587	108.69	87.358	1.7751	-0.472	1393.435897	0.035502949	-0.047204402	20	0	2	43.6585	0		1.5096	57.87379966
791	2.5588	108.8	87.391	1.7756	-0.4719	1394.897436	0.035512399	-0.047190202	20	0	1.9996	43.6585	0		1.5136	57.93237099
792	2.5589	108.93	87.427	1.7761	-0.4718	1396.589744	0.035521199	-0.047177602	20	0	1.9996	43.6587	0		1.5176	58.00159165
793	2.5589	109.07	87.463	1.7764	-0.4716	1398.282051	0.035527499	-0.047161002	20	0	1.9996	43.6589	0		1.52	58.07613698
794	2.559	109.2	87.496	1.7768	-0.4715	1399.974359	0.035535699	-0.047148402	20	0	2	43.659	0		1.5232	58.14535765
795	2.5591	109.33	87.531	1.7773	-0.4713	1401.641026	0.035545149	-0.047127202	20	0	2	43.659	0		1.5272	58.21457831
796	2.5593	109.58	87.599	1.778	-0.471	1404.820513	0.035559599	-0.047101002	20	0	1.9996	43.659	0		1.5328	58.34769497
797	2.5595	109.81	87.667	1.7789	-0.4708	1407.769231	0.035577249	-0.047076602	20	0	2	43.659	0		1.54	58.4701623
798	2.5595	109.92	87.702	1.7792	-0.4708	1409.230769	0.035584799	-0.047080602	20	0	2.0004	43.659	0		1.5424	58.52873363
799	2.5596	110.07	87.735	1.7797	-0.4706	1411.128205	0.035593649	-0.047059402	20	0	2	43.659	0		1.5464	58.60860363
800	2.5597	110.18	87.77	1.78	-0.4705	1412.615385	0.035599949	-0.047047402	20	0	2.0004	43.659	0		1.5488	58.66717496
801	2.5598	110.31	87.805	1.7806	-0.4703	1414.282051	0.035611249	-0.047028602	20	0	2	43.659	0		1.5536	58.73639562
802	2.56	110.54	87.873	1.7813	-0.4699	1417.230769	0.035626999	-0.046990002	20	0	2	43.6591	0		1.5592	58.85886295
803	2.5601	110.69	87.908	1.7816	-0.4698	1419.128205	0.035631399	-0.046980402	20	0	1.9996	43.6593	0		1.5616	58.93873295
804	2.5602	110.84	87.941	1.7821	-0.4696	1421.025641	0.035641499	-0.046959202	20	0	2	43.6595	0		1.5656	59.01860294
805	2.5603	111.05	88.009	1.7829	-0.4693	1423.769231	0.035657249	-0.046926802	20	0	2.0008	43.6597	0		1.572	59.13042094
806	2.5604	111.19	88.045	1.7833	-0.4691	1425.461538	0.035666699	-0.046910402	20	0	1.9996	43.6597	0		1.5752	59.20496627
807	2.5605	111.32	88.081	1.7838	-0.4689	1427.153846	0.035675499	-0.046889802	20	0	2	43.6598	0		1.5792	59.27418693
808	2.5606	111.43	88.113	1.7841	-0.4688	1428.615385	0.035682449	-0.046876402	20	0	1.9996	43.6598	0		1.5816	59.33275826
809	2.5607	111.58	88.149	1.7846	-0.4686	1430.512821	0.035691249	-0.046863002	20	0	2.0004	43.6599	0		1.5856	59.41262826
810	2.5608	111.83	88.216	1.7853	-0.4683	1433.666667	0.035706999	-0.046828402	20	0	2	43.6601	0		1.5912	59.54574492
811	2.5609	111.94	88.251	1.7858	-0.468	1435.153846	0.035715799	-0.046800802	20	0	2	43.6601	0		1.5952	59.60431625
812	2.561	112.07	88.286	1.7862	-0.468	1436.846154	0.035723349	-0.046796002	20	0	2	43.6602	0		1.5984	59.67353692
813	2.5611	112.2	88.318	1.7866	-0.4678	1438.512821	0.035731549	-0.046781802	20	0	2	43.6602	0		1.6016	59.74275758
814	2.5613	112.45	88.387	1.7873	-0.4675	1441.692308	0.035746649	-0.046750402	20	0	1.9996	43.66	0		1.6072	59.87587424
815	2.5614	112.57	88.422	1.7878	-0.4674	1443.153846	0.035755499	-0.046737802	20	0	2.0004	43.66	0		1.6112	59.93977024
816	2.5615	112.7	88.457	1.7882	-0.4672	1444.846154	0.035764299	-0.046722002	20	0	2.0004	43.6598	0		1.6144	60.0089909
817	2.5616	112.94	88.523	1.7889	-0.4669	1448	0.035778799	-0.046689602	20	0	2	43.6596	0		1.62	60.1367829
818	2.5618	113.21	88.591	1.7898	-0.4666	1451.384615	0.035795799	-0.046659602	20	0	2.0004	43.6595	0		1.6272	60.28054889
819	2.5619	113.32	88.625	1.7902	-0.4664	1452.846154	0.035803349	-0.046640802	20	0	2	43.6594	0		1.6304	60.33912022
820	2.562	113.45	88.658	1.7905	-0.4662	1454.538462	0.035810299	-0.046618802	20	0	2	43.6593	0		1.6328	60.40834089
821	2.5621	113.7	88.728	1.7914	-0.466	1457.692308	0.035828549	-0.046598202	20	0	1.9992	43.6592	0		1.64	60.54145755
822	2.5622	113.82	88.76	1.7918	-0.4658	1459.179487	0.035836749	-0.046584002	20	0	2	43.6591	0		1.6432	60.60535355
823	2.5624	114.06	88.829	1.7926	-0.4655	1462.333333	0.035852449	-0.046554002	20	0	2.0004	43.659	0		1.6496	60.73314554
824	2.5625	114.18	88.863	1.793	-0.4653	1463.820513	0.035859399	-0.046533602	20	0	2.0004	43.659	0		1.6528	60.79704154
825	2.5626	114.33	88.899	1.7934	-0.4652	1465.717949	0.035867599	-0.046515402	20	0	2.0004	43.6589	0		1.656	60.87691154
826	2.5627	114.46	88.931	1.7938	-0.465	1467.384615	0.035875799	-0.046503602	20	0	2.0008	43.6586	0		1.6592	60.9461322
827	2.5628	114.67	88.999	1.7945	-0.4647	1470.128205	0.035890899	-0.046474402	20	0	2	43.6581	0		1.6648	61.05795019
828	2.5629	114.82	89.034	1.7951	-0.4645	1472.025641	0.035902249	-0.046454002	20	0	2.0004	43.6577	0		1.6696	61.13782019
829	2.563	114.95	89.069	1.7955	-0.4644	1473.717949	0.035910399	-0.046437402	20	0	2.0008	43.6574	0		1.6728	61.20704086
830	2.5631	115.06	89.102	1.7958	-0.4643	1475.179487	0.035916699	-0.046427202	20	0	2.0004	43.657	0		1.6752	61.26561219
831	2.5632	115.18	89.137	1.7962	-0.4641	1476.666667	0.035924249	-0.046405802	20	0	2	43.6568	0		1.6784	61.32950818
832	2.5633	115.31	89.171	1.7966	-0.4639	1478.358974	0.035931849	-0.046390202	20	0	1.9996	43.6567	0		1.6816	61.39872885
833	2.5634	115.43	89.205	1.797	-0.4638	1479.820513	0.035940649	-0.046376002	20	0	2.0004	43.6567	0		1.6848	61.46262485
834	2.5635	115.57	89.24	1.7974	-0.4636	1481.717949	0.035948199	-0.046359402	20	0	2	43.6568	0		1.688	61.53717018
835	2.5635	115.71	89.274	1.7978	-0.4634	1483.410256	0.035956999	-0.046338802	20	0	1.9996	43.6568	0		1.6912	61.61171551
836	2.5636	115.82	89.307	1.7983	-0.4633	1484.871795	0.035966449	-0.046327802	20	0	2	43.6571	0		1.6952	61.67028684
837	2.5637	115.94	89.343	1.7987	-0.4631	1486.358974	0.035974649	-0.046312802	20	0	1.9996	43.6572	0		1.6984	61.73418283
838	2.5638	116.05	89.375	1.7992	-0.463	1487.820513	0.035984099	-0.046297802	20	0	1.9996	43.6574	0		1.7024	61.79275417
839	2.5639	116.2	89.41	1.7995	-0.4628	1489.717949	0.035990399	-0.046279002	20	0	2	43.6574	0		1.7048	61.87262416
840	2.564	116.33	89.446	1.7999	-0.4627	1491.410256	0.035998599	-0.046267202	20	0	1.9992	43.6576	0		1.708	61.94184483
841	2.5641	116.45	89.478	1.8004	-0.4625	1492.897436	0.036008649	-0.046246602	20	0	2	43.6578	0		1.712	62.00574082
842	2.5642	116.71	89.546	1.8012	-0.4621	1496.25641	0.036023149	-0.046212002	20	0	2	43.6581	0		1.7184	62.14418215
843	2.5643	116.82	89.58	1.8016	-0.462	1497.74359	0.036031349	-0.046198602	20	0	2.0004	43.6581	0		1.7216	62.20275348
844	2.5644	116.94	89.616	1.802	-0.4618	1499.205128	0.036040149	-0.046181202	20	0	1.9996	43.6583	0		1.7248	62.26664948
845	2.5645	117.07	89.649	1.8024	-0.4617	1500.897436	0.036048949	-0.046168602	20	0	2	43.6583	0		1.728	62.33587014
846	2.5646	117.2	89.683	1.8029	-0.4615	1502.589744	0.036057149	-0.046151202	20	0	1.9992	43.6586	0		1.732	62.40509081
847	2.5648	117.43	89.751	1.8036	-0.4612	1505.538462	0.036072899	-0.046122202	20	0	1.9992	43.6588	0		1.7376	62.52755814
848	2.5648	117.56	89.786	1.804	-0.461	1507.205128	0.036079849	-0.046103202	20	0	1.9996	43.659	0		1.7408	62.5967788
849	2.5649	117.71	89.819	1.8044	-0.4609	1509.102564	0.036088649	-0.046085802	20	0	2.0004	43.659	0		1.744	62.6766488
850	2.565	117.83	89.853	1.8049	-0.4607	1510.589744	0.036098099	-0.046070002	20	0	2	43.659	0		1.748	62.74054479
851	2.5651	117.94	89.887	1.8052	-0.4605	1512.051282	0.036104399	-0.046054402	20	0	1.9996	43.659	0		1.7504	62.79911612
852	2.5652	118.07	89.92	1.8057	-0.4604	1513.74359	0.036113199	-0.046038602	20	0	1.9996	43.6591	0		1.7544	62.86833679
853	2.5653	118.19	89.955	1.8061	-0.4602	1515.230769	0.036122649	-0.046022802	20	0	1.9992	43.6593	0		1.7576	62.93223279
854	2.5654	118.34	89.99	1.8065	-0.46	1517.128205	0.036130199	-0.046003002	20	0	2.0008	43.6595	0		1.7608	63.01210278
855	2.5654	118.45	90.023	1.807	-0.4599	1518.589744	0.036139649	-0.045993602	20	0	2.0008	43.6595	0		1.7648	63.07067411
856	2.5655	118.57	90.058	1.8074	-0.4598	1520.076923	0.036147849	-0.045975602	20	0	2.0004	43.6595	0		1.768	63.13457011
857	2.5656	118.7	90.09	1.8078	-0.4596	1521.74359	0.036155399	-0.045962202	20	0	2.0004	43.6595	0		1.7712	63.20379077
858	2.5657	118.81	90.125	1.8081	-0.4594	1523.230769	0.036162349	-0.045944802	20	0	1.9996	43.6593	0		1.7736	63.26236211
859	2.5658	118.94	90.159	1.8086	-0.4593	1524.923077	0.036172399	-0.045926602	20	0	2	43.6593	0		1.7776	63.33158277
860	2.5659	119.06	90.192	1.8091	-0.4591	1526.384615	0.036181249	-0.045910802	20	0	2	43.6594	0		1.7816	63.39547877
861	2.566	119.17	90.227	1.8094	-0.4589	1527.871795	0.036188799	-0.045894402	20	0	2	43.6594	0		1.784	63.4540501
862	2.5661	119.3	90.261	1.8099	-0.4587	1529.538462	0.036197599	-0.045873002	20	0	2.0004	43.6595	0		1.788	63.52327076
863	2.5661	119.45	90.294	1.8102	-0.4587	1531.435897	0.036204549	-0.045867602	20	0	1.9996	43.6595	0		1.7904	63.60314076
864	2.5662	119.58	90.329	1.8107	-0.4584	1533.128205	0.036214599	-0.045843802	20	0	2	43.6595	0		1.7944	63.67236142
865	2.5664	119.81	90.395	1.8114	-0.4582	1536.076923	0.036228449	-0.045817002	20	0	2	43.6597	0		1.8	63.79482875
866	2.5665	119.93	90.43	1.812	-0.458	1537.564103	0.036239799	-0.045799002	20	0	2	43.6597	0		1.8048	63.85872475
867	2.5666	120.04	90.463	1.8124	-0.4579	1539.025641	0.036247999	-0.045787202	20	0	2	43.6597	0		1.808	63.91729608
868	2.5667	120.19	90.497	1.8127	-0.4577	1540.923077	0.036254899	-0.045772202	20	0	1.9996	43.6597	0		1.8104	63.99716608
869	2.5667	120.34	90.532	1.8132	-0.4575	1542.820513	0.036264349	-0.045754002	20	0	2	43.6597	0		1.8144	64.07703607
870	2.5669	120.59	90.599	1.814	-0.4572	1545.974359	0.036280099	-0.045717802	20	0	1.9996	43.6596	0		1.8208	64.21015273
871	2.567	120.69	90.631	1.8145	-0.4571	1547.25641	0.036290199	-0.045710602	20	0	1.9996	43.6596	0		1.8248	64.2633994
872	2.5671	120.82	90.665	1.8148	-0.4568	1548.923077	0.036296499	-0.045678402	20	0	1.9996	43.6595	0		1.8272	64.33262006
873	2.5672	120.96	90.699	1.8153	-0.4569	1550.820513	0.036306549	-0.045685402	20	0	2.0004	43.6594	0		1.8312	64.40716539
874	2.5673	121.08	90.732	1.8156	-0.4565	1552.307692	0.036312249	-0.045654802	20	0	2	43.6593	0		1.8336	64.47106139
875	2.5674	121.31	90.801	1.8165	-0.4562	1555.25641	0.036329849	-0.045624002	20	0	2.0004	43.6592	0		1.8408	64.59352872
876	2.5675	121.44	90.833	1.8168	-0.4561	1556.948718	0.036336799	-0.045608202	20	0	2	43.6591	0		1.8432	64.66274938
877	2.5676	121.57	90.868	1.8173	-0.4559	1558.615385	0.036346849	-0.045592402	20	0	2.0004	43.659	0		1.8472	64.73197005
878	2.5677	121.7	90.903	1.8178	-0.4558	1560.307692	0.036356299	-0.045580602	20	0	2	43.6588	0		1.8512	64.80119071
879	2.5678	121.82	90.935	1.8183	-0.4556	1561.794872	0.036365749	-0.045561602	20	0	2	43.6588	0		1.8552	64.86508671
880	2.5679	121.95	90.97	1.8186	-0.4554	1563.487179	0.036371449	-0.045540402	20	0	2	43.6588	0		1.8576	64.93430737
881	2.568	122.07	91.002	1.819	-0.4553	1564.948718	0.036380249	-0.045525402	20	0	2.0004	43.6587	0		1.8608	64.99820337
882	2.5681	122.18	91.036	1.8195	-0.4551	1566.435897	0.036390299	-0.045513602	20	0	2	43.6584	0		1.8648	65.0567747
883	2.5681	122.31	91.071	1.8199	-0.455	1568.102564	0.036398499	-0.045495402	20	0	2.0008	43.6582	0		1.868	65.12599536
884	2.5682	122.44	91.103	1.8203	-0.4548	1569.794872	0.036405449	-0.045482002	20	0	2.0004	43.658	0		1.8712	65.19521603
885	2.5683	122.58	91.138	1.8206	-0.4547	1571.487179	0.036412999	-0.045465602	20	0	2	43.6578	0		1.8736	65.26976136
886	2.5684	122.71	91.17	1.8211	-0.4545	1573.179487	0.036421799	-0.045446602	20	0	2.0008	43.6576	0		1.8776	65.33898202
887	2.5685	122.82	91.205	1.8215	-0.4542	1574.641026	0.036430649	-0.045424602	20	0	2	43.6574	0		1.8808	65.39755335
888	2.5686	122.94	91.239	1.8219	-0.4541	1576.128205	0.036438199	-0.045406402	20	0	2	43.6574	0		1.884	65.46144935
889	2.5687	123.07	91.272	1.8224	-0.454	1577.794872	0.036447649	-0.045397002	20	0	2	43.6573	0		1.888	65.53067001
890	2.5687	123.2	91.306	1.8229	-0.4538	1579.487179	0.036457099	-0.045383602	20	0	2.0008	43.657	0		1.892	65.59989068
891	2.5689	123.41	91.373	1.8237	-0.4535	1582.230769	0.036474099	-0.045351202	20	0	2	43.6566	0		1.8984	65.71170867
892	2.569	123.56	91.407	1.8241	-0.4533	1584.128205	0.036481649	-0.045330802	20	0	2	43.6565	0		1.9016	65.79157867
893	2.5691	123.68	91.439	1.8244	-0.4532	1585.589744	0.036488549	-0.045315802	20	0	2	43.6564	0		1.904	65.85547467
894	2.5692	123.81	91.474	1.8249	-0.4531	1587.282051	0.036497399	-0.045305602	20	0	2.0004	43.6563	0		1.908	65.92469533
895	2.5693	123.96	91.508	1.8253	-0.4528	1589.179487	0.036506849	-0.045280202	20	0	2.0004	43.6562	0		1.9112	66.00456533
896	2.5694	124.07	91.543	1.8258	-0.4527	1590.666667	0.036515649	-0.045265402	20	0	2	43.6561	0		1.9152	66.06313666
897	2.5694	124.19	91.574	1.8261	-0.4525	1592.128205	0.036522599	-0.045250402	20	0	2.0004	43.6561	0		1.9176	66.12703266
898	2.5695	124.32	91.61	1.8266	-0.4523	1593.820513	0.036532049	-0.045231402	20	0	2	43.656	0		1.9216	66.19625332
899	2.5696	124.47	91.642	1.8271	-0.4522	1595.717949	0.036541449	-0.045217202	20	0	2	43.6558	0		1.9256	66.27612332
900	2.5698	124.68	91.711	1.8278	-0.4518	1598.461538	0.036555949	-0.045178602	20	0	2	43.6557	0		1.9312	66.38794131
901	2.5699	124.83	91.744	1.8283	-0.4517	1600.358974	0.036565399	-0.045172402	20	0	2	43.6555	0		1.9352	66.46781131
902	2.57	124.98	91.777	1.8288	-0.4516	1602.25641	0.036575499	-0.045156602	20	0	2	43.6554	0		1.9392	66.54768131
903	2.5701	125.22	91.845	1.8296	-0.4512	1605.410256	0.036591249	-0.045119402	20	0	2.0004	43.6552	0		1.9456	66.6754733
904	2.5703	125.45	91.911	1.8303	-0.4508	1608.358974	0.036606949	-0.045082402	20	0	2.0004	43.6551	0		1.9512	66.79794063
905	2.5704	125.58	91.946	1.8309	-0.4506	1610.051282	0.036617699	-0.045063602	20	0	2.0004	43.655	0		1.956	66.86716129
906	2.5705	125.7	91.98	1.8312	-0.4505	1611.512821	0.036624599	-0.045045402	20	0	1.9996	43.655	0		1.9584	66.93105729
907	2.5706	125.81	92.012	1.8317	-0.4504	1613	0.036634049	-0.045038402	20	0	2	43.655	0		1.9624	66.98962862
908	2.5707	125.96	92.046	1.8322	-0.4502	1614.897436	0.036643499	-0.045021002	20	0	2	43.655	0		1.9664	67.06949862
909	2.5708	126.19	92.112	1.8329	-0.4498	1617.846154	0.036657349	-0.044984002	20	0	1.9992	43.6553	0		1.972	67.19196595
910	2.5709	126.32	92.147	1.8333	-0.4497	1619.512821	0.036665549	-0.044968202	20	0	2	43.6555	0		1.9752	67.26118661
911	2.571	126.44	92.179	1.8338	-0.4495	1621	0.036675599	-0.044950002	20	0	1.9992	43.6556	0		1.9792	67.32508261
912	2.5711	126.57	92.214	1.8342	-0.4494	1622.692308	0.036683799	-0.044935802	20	0	1.9996	43.6559	0		1.9824	67.39430327
913	2.5712	126.7	92.246	1.8346	-0.4492	1624.358974	0.036692599	-0.044919202	20	0	2	43.6563	0		1.9856	67.46352394
914	2.5713	126.82	92.28	1.835	-0.449	1625.846154	0.036699549	-0.044902802	20	0	1.9992	43.6564	0		1.9888	67.52741993
915	2.5714	126.95	92.314	1.8354	-0.4489	1627.538462	0.036708999	-0.044888602	20	0	1.9992	43.6567	0		1.992	67.5966406
916	2.5714	127.08	92.349	1.8359	-0.4487	1629.205128	0.036718449	-0.044866402	20	0	2	43.6569	0		1.996	67.66586126
917	2.5715	127.21	92.38	1.8362	-0.4485	1630.897436	0.036724749	-0.044851402	20	0	1.9992	43.6572	0		1.9984	67.73508192
918	2.5717	127.44	92.447	1.8371	-0.4482	1633.846154	0.036741749	-0.044819202	20	0	1.9992	43.6578	0		2.0056	67.85754925
919	2.5718	127.59	92.482	1.8376	-0.4481	1635.74359	0.036751199	-0.044805002	20	0	1.9996	43.6582	0		2.0096	67.93741925
920	2.5719	127.7	92.516	1.8379	-0.4479	1637.230769	0.036758749	-0.044786002	20	0	2	43.6586	0		2.012	67.99599058
921	2.572	127.95	92.583	1.8388	-0.4476	1640.384615	0.036775749	-0.044755402	20	0	2	43.6592	0		2.0192	68.12910724
922	2.5721	128.06	92.616	1.8393	-0.4474	1641.846154	0.036785199	-0.044737202	20	0	1.9996	43.6594	0		2.0232	68.18767857
923	2.5722	128.18	92.65	1.8397	-0.4472	1643.333333	0.036793999	-0.044719802	20	0	1.9992	43.6597	0		2.0264	68.25157457
924	2.5723	128.31	92.684	1.8401	-0.447	1645.025641	0.036801599	-0.044700202	20	0	1.9996	43.66	0		2.0296	68.32079523
925	2.5724	128.44	92.717	1.8405	-0.4469	1646.692308	0.036809749	-0.044688402	20	0	1.9996	43.6603	0		2.0328	68.3900159
926	2.5725	128.57	92.752	1.841	-0.4467	1648.384615	0.036819849	-0.044669402	20	0	2.0004	43.6607	0		2.0368	68.45923656
927	2.5726	128.69	92.786	1.8415	-0.4465	1649.871795	0.036829899	-0.044654402	20	0	1.9992	43.6608	0		2.0408	68.52313256
928	2.5727	128.8	92.818	1.8418	-0.4463	1651.333333	0.036835599	-0.044634002	20	0	1.9996	43.6609	0		2.0432	68.58170389
929	2.5727	128.95	92.853	1.8422	-0.4462	1653.230769	0.036844399	-0.044618202	20	0	1.9996	43.661	0		2.0464	68.66157389
930	2.5728	129.07	92.887	1.8427	-0.446	1654.717949	0.036853849	-0.044597602	20	0	2	43.6611	0		2.0504	68.72546988
931	2.5729	129.18	92.919	1.843	-0.4458	1656.179487	0.036860149	-0.044584202	20	0	2	43.6612	0		2.0528	68.78404122
932	2.573	129.33	92.954	1.8435	-0.4457	1658.076923	0.036870249	-0.044566202	20	0	2	43.6612	0		2.0568	68.86391121
933	2.5731	129.45	92.986	1.844	-0.4455	1659.564103	0.036879649	-0.044551202	20	0	2	43.6612	0		2.0608	68.92780721
934	2.5732	129.58	93.02	1.8444	-0.4453	1661.25641	0.036887849	-0.044532202	20	0	1.9996	43.6616	0		2.064	68.99702787
935	2.5733	129.69	93.052	1.8448	-0.4452	1662.717949	0.036896049	-0.044516602	20	0	1.9996	43.6617	0		2.0672	69.0555992
936	2.5733	129.81	93.086	1.8453	-0.445	1664.205128	0.036906149	-0.044502402	20	0	1.9992	43.662	0		2.0712	69.1194952
937	2.5734	129.92	93.119	1.8458	-0.4449	1665.666667	0.036915549	-0.044485802	20	0	1.9996	43.6623	0		2.0752	69.17806653
938	2.5735	130.07	93.154	1.8461	-0.4446	1667.564103	0.036921249	-0.044463002	20	0	2	43.6625	0		2.0776	69.25793653
939	2.5736	130.19	93.187	1.8464	-0.4445	1669.051282	0.036927549	-0.044450202	20	0	1.9996	43.6625	0		2.08	69.32183253
940	2.5737	130.32	93.221	1.8469	-0.4443	1670.717949	0.036938249	-0.044427402	20	0	2	43.6625	0		2.084	69.39105319
941	2.5738	130.45	93.254	1.8474	-0.4441	1672.410256	0.036947699	-0.044413202	20	0	2	43.6625	0		2.088	69.46027385
942	2.5739	130.58	93.288	1.8478	-0.444	1674.102564	0.036956499	-0.044396602	20	0	2	43.6625	0		2.0912	69.52949452
943	2.574	130.71	93.319	1.8481	-0.4438	1675.794872	0.036962199	-0.044379402	20	0	1.9996	43.6625	0		2.0936	69.59871518
944	2.5741	130.96	93.388	1.8491	-0.4435	1678.948718	0.036982949	-0.044351802	20	0	2.0004	43.6625	0		2.1016	69.73183184
945	2.5742	131.07	93.419	1.8495	-0.4433	1680.410256	0.036989899	-0.044328202	20	0	2	43.6625	0		2.1048	69.79040317
946	2.5743	131.2	93.454	1.8499	-0.4431	1682.102564	0.036998699	-0.044313202	20	0	2	43.6625	0		2.108	69.85962384
947	2.5744	131.32	93.488	1.8503	-0.443	1683.589744	0.037006899	-0.044299802	20	0	1.9996	43.6624	0		2.1112	69.92351984
948	2.5745	131.43	93.52	1.8508	-0.4428	1685.051282	0.037015699	-0.044281602	20	0	2	43.6623	0		2.1152	69.98209117
949	2.5746	131.58	93.554	1.8513	-0.4427	1686.948718	0.037025149	-0.044268202	20	0	2.0004	43.6623	0		2.1192	70.06196116
950	2.5746	131.7	93.588	1.8516	-0.4425	1688.435897	0.037032699	-0.044245402	20	0	1.9996	43.6623	0		2.1216	70.12585716
951	2.5747	131.81	93.62	1.852	-0.4423	1689.897436	0.037040249	-0.044233602	20	0	2.0004	43.6623	0		2.1248	70.18442849
952	2.5748	131.96	93.654	1.8525	-0.4421	1691.794872	0.037049699	-0.044209002	20	0	1.9996	43.6623	0		2.1288	70.26429849
953	2.5749	132.09	93.687	1.8529	-0.442	1693.487179	0.037058549	-0.044195602	20	0	2	43.6623	0		2.132	70.33351915
954	2.575	132.21	93.72	1.8534	-0.4418	1694.948718	0.037067999	-0.044180802	20	0	2	43.6622	0		2.136	70.39741515
955	2.5751	132.32	93.753	1.8538	-0.4416	1696.435897	0.037075549	-0.044158602	20	0	2.0004	43.6621	0		2.1392	70.45598648
956	2.5752	132.44	93.786	1.8542	-0.4414	1697.897436	0.037084349	-0.044141402	20	0	2	43.6618	0		2.1424	70.51988248
957	2.5753	132.58	93.82	1.8547	-0.4413	1699.794872	0.037094449	-0.044131802	20	0	1.9996	43.6616	0		2.1464	70.59442781
958	2.5754	132.85	93.886	1.8556	-0.4409	1703.179487	0.037111449	-0.044094002	20	0	2.0004	43.6612	0		2.1536	70.7381938
959	2.5756	133.09	93.954	1.8564	-0.4406	1706.333333	0.037128449	-0.044057002	20	0	2.0012	43.6609	0		2.16	70.8659858
960	2.5758	133.32	94.021	1.8573	-0.4402	1709.282051	0.037146099	-0.044022202	20	0	2	43.6606	0		2.1672	70.98845313
961	2.5759	133.44	94.052	1.8576	-0.4401	1710.769231	0.037152999	-0.044009602	20	0	2	43.6606	0		2.1696	71.05234912
962	2.576	133.57	94.087	1.8581	-0.4399	1712.435897	0.037162449	-0.043991602	20	0	2.0004	43.6605	0		2.1736	71.12156979
963	2.576	133.69	94.12	1.8586	-0.4397	1713.923077	0.037171249	-0.043968602	20	0	2.0008	43.6603	0		2.1776	71.18546578
964	2.5761	133.82	94.152	1.8589	-0.4396	1715.615385	0.037178849	-0.043959202	20	0	2.0004	43.6602	0		2.18	71.25468645
965	2.5762	133.97	94.186	1.8594	-0.4394	1717.512821	0.037188299	-0.043937202	20	0	2	43.66	0		2.184	71.33455645
966	2.5763	134.08	94.221	1.8598	-0.4392	1718.974359	0.037195199	-0.043922202	20	0	2.0004	43.6599	0		2.1872	71.39312778
967	2.5764	134.21	94.253	1.8603	-0.4391	1720.666667	0.037205299	-0.043905602	20	0	2.0008	43.6597	0		2.1912	71.46234844
968	2.5766	134.44	94.319	1.8611	-0.4387	1723.615385	0.037221649	-0.043867802	20	0	2.0008	43.6591	0		2.1976	71.58481577
969	2.5766	134.56	94.353	1.8616	-0.4385	1725.076923	0.037231099	-0.043850402	20	0	2.0008	43.6589	0		2.2016	71.64871177
970	2.5767	134.67	94.384	1.862	-0.4384	1726.564103	0.037239899	-0.043840202	20	0	2.0004	43.6585	0		2.2048	71.7072831
971	2.5768	134.84	94.419	1.8623	-0.4382	1728.666667	0.037246199	-0.043819002	20	0	2.0004	43.6584	0		2.2072	71.79780243
972	2.577	135.07	94.485	1.8633	-0.4379	1731.615385	0.037265749	-0.043785002	20	0	2.0004	43.6579	0		2.2152	71.92026976
973	2.5771	135.2	94.519	1.8637	-0.4377	1733.307692	0.037273299	-0.043767002	20	0	2.0012	43.6576	0		2.2184	71.98949042
974	2.5772	135.33	94.553	1.8642	-0.4375	1735	0.037283999	-0.043748002	20	0	2.0004	43.6572	0		2.2224	72.05871108
975	2.5773	135.46	94.586	1.8646	-0.4373	1736.666667	0.037292199	-0.043731402	20	0	2.0012	43.657	0		2.2256	72.12793175
976	2.5774	135.69	94.652	1.8654	-0.437	1739.615385	0.037308549	-0.043697602	20	0	2.0008	43.6563	0		2.232	72.25039908
977	2.5775	135.82	94.685	1.866	-0.4368	1741.307692	0.037319899	-0.043675402	20	0	1.9996	43.6562	0		2.2368	72.31961974
978	2.5776	135.95	94.72	1.8663	-0.4366	1743	0.037326849	-0.043664402	20	0	2	43.6561	0		2.2392	72.3888404
979	2.5777	136.1	94.754	1.8668	-0.4364	1744.897436	0.037336899	-0.043641602	20	0	2.0008	43.6561	0		2.2432	72.4687104
980	2.5779	136.32	94.82	1.8677	-0.436	1747.641026	0.037353299	-0.043603002	20	0	2	43.6559	0		2.2504	72.58585306
981	2.5779	136.43	94.852	1.8682	-0.436	1749.102564	0.037363999	-0.043598202	20	0	2	43.6559	0		2.2544	72.64442439
982	2.578	136.56	94.886	1.8686	-0.4358	1750.794872	0.037371549	-0.043577802	20	0	2	43.6558	0		2.2576	72.71364506
983	2.5781	136.69	94.92	1.869	-0.4356	1752.487179	0.037379749	-0.043561202	20	0	2.0008	43.6558	0		2.2608	72.78286572
984	2.5782	136.81	94.951	1.8695	-0.4354	1753.948718	0.037389799	-0.043539802	20	0	2	43.6557	0		2.2648	72.84676172
985	2.5783	136.94	94.985	1.8698	-0.4352	1755.641026	0.037396749	-0.043522602	20	0	2.0004	43.6557	0		2.2672	72.91598238
986	2.5784	137.09	95.017	1.8703	-0.435	1757.538462	0.037405549	-0.043499602	20	0	2.0004	43.6557	0		2.2712	72.99585238
987	2.5786	137.33	95.085	1.8712	-0.4347	1760.692308	0.037423799	-0.043472202	20	0	2.0004	43.6558	0		2.2784	73.12364437
988	2.5786	137.45	95.117	1.8717	-0.4345	1762.179487	0.037433249	-0.043452402	20	0	2	43.656	0		2.2824	73.18754037
989	2.5788	137.7	95.185	1.8725	-0.4342	1765.333333	0.037450249	-0.043421602	20	0	2.0004	43.6563	0		2.2888	73.32065703
990	2.5789	137.83	95.217	1.8729	-0.4341	1767.025641	0.037458449	-0.043405202	20	0	2	43.6565	0		2.292	73.3898777
991	2.579	137.94	95.251	1.8734	-0.4339	1768.487179	0.037467299	-0.043386202	20	0	1.9992	43.6565	0		2.296	73.44844903
992	2.5791	138.07	95.283	1.8738	-0.4337	1770.179487	0.037476699	-0.043365002	20	0	2.0004	43.6567	0		2.2992	73.51766969
993	2.5792	138.21	95.317	1.8742	-0.4335	1771.871795	0.037484299	-0.043351602	20	0	2	43.6569	0		2.3024	73.59221502
994	2.5792	138.34	95.352	1.8747	-0.4334	1773.564103	0.037493749	-0.043342802	20	0	2	43.6569	0		2.3064	73.66143568
995	2.5793	138.45	95.383	1.8752	-0.4332	1775.025641	0.037503149	-0.043318402	20	0	2.0004	43.6568	0		2.3104	73.72000702
996	2.5794	138.58	95.417	1.8755	-0.433	1776.717949	0.037510099	-0.043300202	20	0	1.9996	43.6568	0		2.3128	73.78922768
997	2.5795	138.7	95.449	1.876	-0.4328	1778.179487	0.037519549	-0.043283802	20	0	2.0004	43.6569	0		2.3168	73.85312368
998	2.5796	138.83	95.483	1.8764	-0.4326	1779.871795	0.037528349	-0.043263202	20	0	1.9996	43.6569	0		2.32	73.92234434
999	2.5797	138.95	95.517	1.8768	-0.4324	1781.358974	0.037536549	-0.043243602	20	0	2	43.6569	0		2.3232	73.98624034
1000	2.5798	139.06	95.548	1.8772	-0.4323	1782.820513	0.037544749	-0.043228602	20	0	2	43.657	0		2.3264	74.04481167
1001	2.5799	139.21	95.582	1.8777	-0.4321	1784.717949	0.037554799	-0.043208002	20	0	2.0004	43.657	0		2.3304	74.12468167
1002	2.5799	139.32	95.616	1.8782	-0.432	1786.205128	0.037564249	-0.043200202	20	0	2.0004	43.657	0		2.3344	74.183253
1003	2.58	139.44	95.648	1.8786	-0.4317	1787.666667	0.037571799	-0.043172602	20	0	1.9996	43.657	0		2.3376	74.24714899
1004	2.5801	139.57	95.682	1.8791	-0.4316	1789.358974	0.037581249	-0.043159202	20	0	1.9996	43.6571	0		2.3416	74.31636966
1005	2.5802	139.7	95.716	1.8796	-0.4314	1791.051282	0.037591349	-0.043141802	20	0	2	43.6572	0		2.3456	74.38559032
1006	2.5803	139.83	95.748	1.8799	-0.4312	1792.717949	0.037597649	-0.043119002	20	0	1.9996	43.6572	0		2.348	74.45481099
1007	2.5804	139.95	95.781	1.8804	-0.4311	1794.205128	0.037608349	-0.043106402	20	0	2	43.6573	0		2.352	74.51870698
1008	2.5805	140.1	95.815	1.8809	-0.4308	1796.102564	0.037617149	-0.043079602	20	0	2.0004	43.6573	0		2.356	74.59857698
1009	2.5806	140.33	95.881	1.8817	-0.4306	1799.051282	0.037634149	-0.043056802	20	0	2.0004	43.6572	0		2.3624	74.72104431
1010	2.5807	140.46	95.912	1.8821	-0.4303	1800.74359	0.037642999	-0.043027602	20	0	2.0004	43.6572	0		2.3656	74.79026497
1011	2.5809	140.7	95.981	1.883	-0.4301	1803.897436	0.037659349	-0.043006202	20	0	2	43.6569	0		2.3728	74.91805697
1012	2.581	140.84	96.012	1.8834	-0.4298	1805.589744	0.037668199	-0.042979402	20	0	2.0004	43.6567	0		2.376	74.9926023
1013	2.5812	141.07	96.078	1.8843	-0.4295	1808.538462	0.037685199	-0.042949602	20	0	2.0004	43.6562	0		2.3832	75.11506963
1014	2.5812	141.21	96.112	1.8848	-0.4293	1810.435897	0.037695899	-0.042925802	20	0	1.9996	43.6561	0		2.3872	75.18961496
1015	2.5813	141.33	96.146	1.8852	-0.4291	1811.897436	0.037703449	-0.042910202	20	0	2	43.6558	0		2.3904	75.25351095
1016	2.5814	141.44	96.178	1.8855	-0.4289	1813.384615	0.037710999	-0.042894402	20	0	2.0004	43.6558	0		2.3928	75.31208228
1017	2.5815	141.57	96.212	1.8861	-0.4288	1815.051282	0.037722349	-0.042875402	20	0	2.0008	43.6558	0		2.3976	75.38130295
1018	2.5816	141.69	96.243	1.8864	-0.4286	1816.538462	0.037727999	-0.042862802	20	0	2	43.6556	0		2.4	75.44519895
1019	2.5817	141.8	96.278	1.8868	-0.4284	1818	0.037736849	-0.042841602	20	0	2.0004	43.6554	0		2.4032	75.50377028
1020	2.5818	141.97	96.311	1.8874	-0.4282	1820.128205	0.037748149	-0.042821802	20	0	2	43.6552	0		2.408	75.59428961
1021	2.5819	142.18	96.377	1.8883	-0.4279	1822.846154	0.037765799	-0.042789602	20	0	2	43.6548	0		2.4152	75.7061076
1022	2.582	142.35	96.411	1.8887	-0.4277	1824.974359	0.037774599	-0.042766602	20	0	1.9996	43.6548	0		2.4184	75.79662693
1023	2.5822	142.58	96.477	1.8895	-0.4274	1827.923077	0.037790999	-0.042736002	20	0	2	43.6547	0		2.4248	75.91909426
1024	2.5823	142.69	96.511	1.8901	-0.4271	1829.384615	0.037801049	-0.042714602	20	0	2	43.6547	0		2.4296	75.97766559
1025	2.5824	142.81	96.542	1.8905	-0.427	1830.871795	0.037810499	-0.042698002	20	0	1.9996	43.6547	0		2.4328	76.04156159
1026	2.5825	142.94	96.576	1.891	-0.4268	1832.538462	0.037819949	-0.042680802	20	0	2.0004	43.6548	0		2.4368	76.11078225
1027	2.5825	143.07	96.61	1.8914	-0.4266	1834.230769	0.037828149	-0.042660202	20	0	1.9988	43.6549	0		2.44	76.18000292
1028	2.5826	143.19	96.642	1.8918	-0.4264	1835.717949	0.037836349	-0.042642802	20	0	1.9996	43.655	0		2.4432	76.24389891
1029	2.5827	143.32	96.676	1.8923	-0.4263	1837.384615	0.037845799	-0.042626402	20	0	2	43.6552	0		2.4472	76.31311958
1030	2.5828	143.45	96.708	1.8927	-0.4261	1839.076923	0.037853349	-0.042606602	20	0	2	43.6552	0		2.4504	76.38234024
1031	2.5829	143.56	96.742	1.8931	-0.4259	1840.564103	0.037862149	-0.042593202	20	0	2.0008	43.6552	0		2.4536	76.44091157
1032	2.583	143.69	96.773	1.8936	-0.4257	1842.230769	0.037872249	-0.042574402	20	0	2.0004	43.6552	0		2.4576	76.51013224
1033	2.5831	143.81	96.807	1.894	-0.4256	1843.717949	0.037879149	-0.042557002	20	0	2	43.6552	0		2.4608	76.57402823
1034	2.5832	143.96	96.841	1.8945	-0.4254	1845.615385	0.037889249	-0.042539602	20	0	2.0004	43.6552	0		2.4648	76.65389823
1035	2.5833	144.2	96.907	1.8953	-0.425	1848.769231	0.037906249	-0.042497802	20	0	2.0004	43.655	0		2.4712	76.78169022
1036	2.5834	144.32	96.941	1.8958	-0.4249	1850.25641	0.037916949	-0.042485202	20	0	2.0008	43.6547	0		2.4752	76.84558622
1037	2.5835	144.43	96.973	1.8963	-0.4247	1851.717949	0.037926399	-0.042465602	20	0	2.0008	43.6544	0		2.4792	76.90415755
1038	2.5836	144.58	97.007	1.8967	-0.4245	1853.615385	0.037934599	-0.042445802	20	0	2.0008	43.6541	0		2.4824	76.98402755
1039	2.5837	144.7	97.038	1.8972	-0.4243	1855.102564	0.037944049	-0.042434802	20	0	2	43.6539	0		2.4864	77.04792355
1040	2.5838	144.81	97.072	1.8977	-0.4241	1856.564103	0.037953499	-0.042407202	20	0	2.0004	43.6537	0		2.4904	77.10649488
1041	2.5838	144.96	97.107	1.8981	-0.424	1858.461538	0.037961049	-0.042396202	20	0	2.0008	43.6537	0		2.4936	77.18636488
1042	2.5839	145.08	97.138	1.8985	-0.4238	1859.948718	0.037970499	-0.042376402	20	0	1.9992	43.6535	0		2.4968	77.25026087
1043	2.584	145.19	97.172	1.899	-0.4236	1861.410256	0.037979299	-0.042358402	20	0	1.9992	43.6535	0		2.5008	77.3088322
1044	2.5841	145.34	97.206	1.8994	-0.4234	1863.307692	0.037988099	-0.042339402	20	0	2	43.6535	0		2.504	77.3887022
1045	2.5842	145.44	97.238	1.8999	-0.4232	1864.589744	0.037997549	-0.042322802	20	0	1.9996	43.6537	0		2.508	77.44194886
1046	2.5843	145.57	97.272	1.9003	-0.423	1866.25641	0.038005749	-0.042299202	20	0	1.9992	43.6538	0		2.5112	77.51116953
1047	2.5844	145.68	97.303	1.9008	-0.4229	1867.74359	0.038015199	-0.042289802	20	0	1.9996	43.6539	0		2.5152	77.56974086
1048	2.5845	145.82	97.337	1.9012	-0.4226	1869.435897	0.038023999	-0.042263802	20	0	1.9992	43.6539	0		2.5184	77.64428619
1049	2.5845	145.95	97.371	1.9016	-0.4225	1871.102564	0.038032849	-0.042249602	20	0	2	43.6541	0		2.5216	77.71350685
1050	2.5846	146.06	97.403	1.9021	-0.4223	1872.589744	0.038041649	-0.042226802	20	0	2.0004	43.6542	0		2.5256	77.77207818
1051	2.5847	146.21	97.437	1.9026	-0.4222	1874.487179	0.038051099	-0.042217202	20	0	2	43.6546	0		2.5296	77.85194818
1052	2.5848	146.32	97.471	1.903	-0.4219	1875.948718	0.038060549	-0.042193602	20	0	2	43.6546	0		2.5328	77.91051951
1053	2.5849	146.46	97.503	1.9034	-0.4218	1877.641026	0.038068749	-0.042177002	20	0	1.9996	43.6547	0		2.536	77.98506484
1054	2.5851	146.7	97.57	1.9043	-0.4214	1880.794872	0.038086999	-0.042139202	20	0	2	43.6548	0		2.5432	78.11285684
1055	2.5852	146.83	97.602	1.9047	-0.4213	1882.487179	0.038094549	-0.042127402	20	0	1.9996	43.6549	0		2.5464	78.1820775
1056	2.5852	146.95	97.636	1.9053	-0.4211	1883.974359	0.038105249	-0.042106202	20	0	1.9992	43.6549	0		2.5512	78.2459735
1057	2.5853	147.06	97.667	1.9056	-0.4209	1885.435897	0.038112199	-0.042092002	20	0	2	43.6551	0		2.5536	78.30454483
1058	2.5854	147.2	97.701	1.906	-0.4207	1887.128205	0.038120999	-0.042070602	20	0	2	43.6553	0		2.5568	78.37909016
1059	2.5855	147.33	97.735	1.9065	-0.4205	1888.820513	0.038130449	-0.042047002	20	0	1.9996	43.6555	0		2.5608	78.44831082
1060	2.5856	147.46	97.766	1.9069	-0.4203	1890.487179	0.038138649	-0.042029602	20	0	1.9996	43.6555	0		2.564	78.51753149
1061	2.5857	147.59	97.8	1.9074	-0.4202	1892.179487	0.038147449	-0.042017802	20	0	1.9996	43.6557	0		2.568	78.58675215
1062	2.5858	147.85	97.866	1.9083	-0.4198	1895.564103	0.038166999	-0.041976802	20	0	1.9992	43.6561	0		2.5752	78.72519348
1063	2.586	148.05	97.931	1.9092	-0.4194	1898.076923	0.038184599	-0.041943802	20	0	2	43.6564	0		2.5824	78.83168681
1064	2.5861	148.21	97.965	1.9097	-0.4193	1900.179487	0.038193449	-0.041928002	20	0	2	43.6566	0		2.5864	78.91688147
1065	2.5862	148.33	97.999	1.9101	-0.4191	1901.666667	0.038202899	-0.041911402	20	0	2	43.6568	0		2.5896	78.98077747
1066	2.5863	148.44	98.03	1.9106	-0.4188	1903.128205	0.038211699	-0.041884602	20	0	1.9996	43.6568	0		2.5936	79.0393488
1067	2.5864	148.56	98.064	1.911	-0.4187	1904.615385	0.038219249	-0.041874402	20	0	2	43.6569	0		2.5968	79.1032448
1068	2.5865	148.69	98.095	1.9115	-0.4187	1906.307692	0.038229949	-0.041865002	20	0	1.9996	43.6573	0		2.6008	79.17246546
1069	2.5865	148.81	98.13	1.9119	-0.4184	1907.769231	0.038238149	-0.041838202	20	0	2	43.6573	0		2.604	79.23636146
1070	2.5866	148.95	98.164	1.9123	-0.4182	1909.666667	0.038246349	-0.041822402	20	0	2	43.6573	0		2.6072	79.31090679
1071	2.5867	149.07	98.195	1.9128	-0.418	1911.153846	0.038256399	-0.041802602	20	0	2	43.6576	0		2.6112	79.37480279
1072	2.5868	149.18	98.23	1.9133	-0.4179	1912.615385	0.038265849	-0.041785402	20	0	2	43.6575	0		2.6152	79.43337412
1073	2.5869	149.32	98.264	1.9137	-0.4176	1914.307692	0.038274049	-0.041756202	20	0	2	43.6574	0		2.6184	79.50791945
1074	2.587	149.45	98.295	1.9141	-0.4175	1916	0.038281599	-0.041746602	20	0	2.0004	43.6574	0		2.6216	79.57714011
1075	2.5871	149.56	98.329	1.9146	-0.4173	1917.461538	0.038292299	-0.041727802	20	0	2.0004	43.6573	0		2.6256	79.63571144
1076	2.5871	149.69	98.363	1.915	-0.417	1919.153846	0.038300499	-0.041697802	20	0	2	43.6571	0		2.6288	79.70493211
1077	2.5872	149.84	98.394	1.9155	-0.4169	1921.051282	0.038309949	-0.041693802	20	0	1.9996	43.6571	0		2.6328	79.7848021
1078	2.5873	149.96	98.428	1.9159	-0.4167	1922.512821	0.038318149	-0.041673402	20	0	2.0004	43.6571	0		2.636	79.8486981
1079	2.5874	150.09	98.462	1.9164	-0.4165	1924.205128	0.038328199	-0.041651402	20	0	2.0008	43.6571	0		2.64	79.91791876
1080	2.5876	150.32	98.527	1.9174	-0.416	1927.153846	0.038347099	-0.041604002	20	0	2.0004	43.6568	0		2.648	80.04038609
1081	2.5877	150.43	98.56	1.9177	-0.416	1928.641026	0.038354649	-0.041602402	20	0	1.9996	43.6567	0		2.6504	80.09895742
1082	2.5878	150.58	98.593	1.9181	-0.4158	1930.538462	0.038362849	-0.041578002	20	0	1.9996	43.6565	0		2.6536	80.17882742
1083	2.5878	150.7	98.626	1.9187	-0.4157	1932	0.038374199	-0.041567002	20	0	2	43.6565	0		2.6584	80.24272342
1084	2.5879	150.81	98.658	1.9191	-0.4155	1933.487179	0.038381749	-0.041547202	20	0	1.9992	43.6565	0		2.6616	80.30129475
1085	2.588	150.96	98.692	1.9194	-0.4153	1935.384615	0.038388649	-0.041530002	20	0	2	43.6565	0		2.664	80.38116475
1086	2.5881	151.09	98.723	1.92	-0.4151	1937.051282	0.038400649	-0.041509402	20	0	2.0004	43.6565	0		2.6688	80.45038541
1087	2.5882	151.21	98.756	1.9204	-0.4148	1938.538462	0.038408199	-0.041480202	20	0	2.0004	43.6563	0		2.672	80.51428141
1088	2.5883	151.34	98.79	1.9209	-0.4147	1940.230769	0.038418249	-0.041473202	20	0	2	43.6562	0		2.676	80.58350207
1089	2.5885	151.58	98.855	1.9218	-0.4144	1943.384615	0.038435249	-0.041437602	20	0	2	43.6562	0		2.6832	80.71129407
1090	2.5886	151.81	98.921	1.9227	-0.4139	1946.333333	0.038453549	-0.041392002	20	0	2	43.6559	0		2.6904	80.83376139
1091	2.5887	151.95	98.955	1.9231	-0.4137	1948.025641	0.038462999	-0.041369202	20	0	2	43.6557	0		2.6936	80.90830672
1092	2.5888	152.06	98.987	1.9236	-0.4136	1949.487179	0.038472449	-0.041358002	20	0	1.9996	43.6554	0		2.6976	80.96687806
1093	2.5889	152.19	99.021	1.9242	-0.4135	1951.179487	0.038483149	-0.041351802	20	0	2	43.6553	0		2.7024	81.03609872
1094	2.589	152.31	99.054	1.9245	-0.4132	1952.666667	0.038490049	-0.041321002	20	0	1.9996	43.6551	0		2.7048	81.09999472
1095	2.5891	152.44	99.086	1.925	-0.4131	1954.333333	0.038500749	-0.041305202	20	0	2.0004	43.6551	0		2.7088	81.16921538
1096	2.5891	152.59	99.121	1.9254	-0.4129	1956.230769	0.038507699	-0.041285602	20	0	2.0012	43.6548	0		2.712	81.24908538
1097	2.5893	152.83	99.186	1.9263	-0.4125	1959.410256	0.038525349	-0.041247002	20	0	2.0004	43.6541	0		2.7192	81.37687737
1098	2.5894	152.95	99.22	1.9268	-0.4123	1960.871795	0.038536049	-0.041229602	20	0	2.0004	43.6538	0		2.7232	81.44077337
1099	2.5895	153.1	99.251	1.9272	-0.4121	1962.769231	0.038544849	-0.041207602	20	0	2	43.6535	0		2.7264	81.52064337
1100	2.5897	153.31	99.32	1.9281	-0.4117	1965.512821	0.038561849	-0.041171202	20	0	2.0004	43.6531	0		2.7336	81.63246136
1101	2.5898	153.42	99.351	1.9286	-0.4117	1966.974359	0.038572549	-0.041169002	20	0	1.9996	43.6529	0		2.7376	81.69103269
1102	2.5898	153.59	99.385	1.929	-0.4114	1969.102564	0.038580749	-0.041143602	20	0	2	43.6527	0		2.7408	81.78155202
1103	2.59	153.84	99.45	1.93	-0.411	1972.25641	0.038599649	-0.041099602	20	0	2	43.6527	0		2.7488	81.91466868
1104	2.5902	154.08	99.518	1.931	-0.4107	1975.410256	0.038620449	-0.041068002	20	0	1.9996	43.6525	0		2.7568	82.04246068
1105	2.5903	154.2	99.55	1.9314	-0.4106	1976.897436	0.038627349	-0.041056202	20	0	2	43.6524	0		2.76	82.10635668
1106	2.5904	154.33	99.584	1.9318	-0.4103	1978.564103	0.038636199	-0.041031002	20	0	2	43.6525	0		2.7632	82.17557734
1107	2.5904	154.48	99.615	1.9322	-0.4101	1980.461538	0.038644999	-0.041011202	20	0	2	43.6526	0		2.7664	82.25544734
1108	2.5906	154.71	99.682	1.9332	-0.4097	1983.410256	0.038664499	-0.040968802	20	0	2.0004	43.6529	0		2.7744	82.37791467
1109	2.5907	154.82	99.715	1.9337	-0.4096	1984.897436	0.038673349	-0.040959202	20	0	1.9996	43.6529	0		2.7784	82.436486
1110	2.5908	154.95	99.748	1.9341	-0.4092	1986.589744	0.038682149	-0.040919802	20	0	1.9996	43.653	0		2.7816	82.50570666
1111	2.5909	155.07	99.78	1.9345	-0.409	1988.051282	0.038690949	-0.040902402	20	0	1.9996	43.6531	0		2.7848	82.56960266
1112	2.591	155.18	99.814	1.9351	-0.409	1989.538462	0.038701699	-0.040898602	20	0	1.9996	43.6534	0		2.7896	82.62817399
1113	2.5911	155.31	99.848	1.9355	-0.4088	1991.205128	0.038709849	-0.040876402	20	0	1.9996	43.6535	0		2.7928	82.69739465
1114	2.5911	155.45	99.88	1.936	-0.4087	1992.897436	0.038719949	-0.040866202	20	0	1.9996	43.6537	0		2.7968	82.77193998
1115	2.5913	155.71	99.947	1.9369	-0.4081	1996.282051	0.038737599	-0.040812602	20	0	1.9996	43.654	0		2.804	82.91038131
1116	2.5914	155.84	99.978	1.9373	-0.4079	1997.948718	0.038746399	-0.040787402	20	0	1.9996	43.6544	0		2.8072	82.97960197
1117	2.5915	155.97	100.012	1.9378	-0.4079	1999.641026	0.038756449	-0.040786602	20	0	1.9996	43.6549	0		2.8112	83.04882264
1118	2.5916	156.09	100.043	1.9383	-0.4077	2001.128205	0.038765299	-0.040769202	20	0	1.9996	43.6553	0		2.8152	83.11271864
1119	2.5917	156.32	100.11	1.9392	-0.4074	2004.076923	0.038784799	-0.040735402	20	0	2	43.6561	0		2.8224	83.23518596
1120	2.5918	156.45	100.142	1.9396	-0.4072	2005.74359	0.038791749	-0.040717202	20	0	2	43.6561	0		2.8256	83.30440663
1121	2.5919	156.58	100.176	1.9401	-0.407	2007.435897	0.038801799	-0.040696802	20	0	1.9996	43.6565	0		2.8296	83.37362729
1122	2.592	156.71	100.207	1.9404	-0.4067	2009.128205	0.038808749	-0.040670002	20	0	2.0004	43.6567	0		2.832	83.44284796
1123	2.5921	156.83	100.241	1.9411	-0.4066	2010.589744	0.038821949	-0.040658202	20	0	2	43.6569	0		2.8376	83.50674395
1124	2.5922	156.96	100.274	1.9415	-0.4062	2012.282051	0.038830149	-0.040616402	20	0	1.9996	43.6572	0		2.8408	83.57596462
1125	2.5923	157.09	100.306	1.9419	-0.4062	2013.974359	0.038837699	-0.040618002	20	0	2	43.6577	0		2.844	83.64518528
1126	2.5924	157.2	100.339	1.9424	-0.4059	2015.435897	0.038847149	-0.040594202	20	0	1.9992	43.6579	0		2.848	83.70375661
1127	2.5924	157.32	100.372	1.9429	-0.4058	2016.923077	0.038857849	-0.040577002	20	0	1.9996	43.6583	0		2.852	83.76765261
1128	2.5925	157.45	100.404	1.9433	-0.4055	2018.615385	0.038866699	-0.040550202	20	0	1.9996	43.6585	0		2.8552	83.83687327
1129	2.5926	157.58	100.438	1.9437	-0.4054	2020.282051	0.038874849	-0.040539202	20	0	1.9996	43.6588	0		2.8584	83.90609394
1130	2.5927	157.7	100.471	1.9442	-0.4053	2021.769231	0.038884949	-0.040528002	20	0	1.9996	43.659	0		2.8624	83.96998993
1131	2.5928	157.83	100.502	1.9447	-0.405	2023.461538	0.038893149	-0.040503602	20	0	2	43.6592	0		2.8664	84.0392106
1132	2.593	158.08	100.568	1.9456	-0.4045	2026.615385	0.038911399	-0.040448402	20	0	2	43.6595	0		2.8736	84.17232726
1133	2.5931	158.19	100.602	1.946	-0.4045	2028.076923	0.038920199	-0.040450802	20	0	2	43.6595	0		2.8768	84.23089859
1134	2.5931	158.32	100.636	1.9465	-0.4044	2029.769231	0.038930949	-0.040437402	20	0	1.9996	43.6598	0		2.8808	84.30011925
1135	2.5932	158.45	100.668	1.947	-0.4041	2031.461538	0.038940349	-0.040409002	20	0	1.9996	43.6597	0		2.8848	84.36933992
1136	2.5933	158.6	100.701	1.9475	-0.404	2033.358974	0.038949799	-0.040396402	20	0	1.9996	43.6596	0		2.8888	84.44920991
1137	2.5935	158.85	100.767	1.9484	-0.4036	2036.512821	0.038967449	-0.040355402	20	0	1.9996	43.6595	0		2.896	84.58232658
1138	2.5937	159.08	100.831	1.9494	-0.4032	2039.461538	0.038987599	-0.040319202	20	0	2	43.6596	0		2.904	84.7047939
1139	2.5937	159.19	100.865	1.9498	-0.403	2040.948718	0.038995149	-0.040303402	20	0	2.0004	43.6596	0		2.9072	84.76336524
1140	2.5938	159.34	100.898	1.9502	-0.4027	2042.846154	0.039004599	-0.040271202	20	0	2.0004	43.6596	0		2.9104	84.84323523
1141	2.594	159.56	100.962	1.9511	-0.402	2045.589744	0.039022899	-0.040199402	20	0	2.0004	43.6595	0		2.9176	84.96037789
1142	2.5941	159.7	100.994	1.9516	-0.4023	2047.461538	0.039032949	-0.040226202	20	0	2.0004	43.6595	0		2.9216	85.03492322
1143	2.5943	159.97	101.06	1.9526	-0.4018	2050.846154	0.039051199	-0.040183602	20	0	1.9996	43.6592	0		2.9296	85.17868922
1144	2.5944	160.1	101.092	1.953	-0.4018	2052.538462	0.039060649	-0.040175802	20	0	2.0004	43.659	0		2.9328	85.24790988
1145	2.5945	160.33	101.159	1.954	-0.4017	2055.487179	0.039079549	-0.040167002	20	0	2	43.6586	0		2.9408	85.37037721
1146	2.5946	160.46	101.191	1.9544	-0.4012	2057.153846	0.039087749	-0.040118202	20	0	2.0004	43.6586	0		2.944	85.43959787
1147	2.5947	160.59	101.224	1.9548	-0.401	2058.846154	0.039096549	-0.040096202	20	0	1.9996	43.6586	0		2.9472	85.50881854
1148	2.5949	160.82	101.29	1.9558	-0.4006	2061.794872	0.039116099	-0.040059002	20	0	1.9996	43.6587	0		2.9552	85.63128587
1149	2.595	160.95	101.323	1.9562	-0.4004	2063.487179	0.039124249	-0.040041802	20	0	2.0004	43.6588	0		2.9584	85.70050653
1150	2.595	161.07	101.354	1.9567	-0.4003	2064.974359	0.039134999	-0.040027602	20	0	2	43.6588	0		2.9624	85.76440253
1151	2.5952	161.33	101.422	1.9576	-0.3997	2068.333333	0.039152599	-0.039974802	20	0	2.0004	43.6588	0		2.9696	85.90284386
1152	2.5954	161.58	101.486	1.9586	-0.3994	2071.487179	0.039172749	-0.039943202	20	0	2.0004	43.6585	0		2.9776	86.03596052
1153	2.5955	161.71	101.52	1.959	-0.3993	2073.179487	0.039180949	-0.039929802	20	0	2.0008	43.6581	0		2.9808	86.10518118
1154	2.5956	161.82	101.551	1.9595	-0.399	2074.666667	0.039189749	-0.039904602	20	0	2.0004	43.658	0		2.9848	86.16375251
1155	2.5957	161.94	101.584	1.96	-0.399	2076.128205	0.039199849	-0.039895202	20	0	1.9996	43.6579	0		2.9888	86.22764851
1156	2.5957	162.07	101.616	1.9604	-0.3987	2077.820513	0.039208049	-0.039869202	20	0	2	43.6579	0		2.992	86.29686917
1157	2.5959	162.33	101.683	1.9613	-0.3983	2081.179487	0.039226299	-0.039830602	20	0	2.0004	43.6579	0		2.9992	86.4353105
1158	2.596	162.43	101.715	1.9618	-0.3981	2082.461538	0.039235099	-0.039810802	20	0	1.9996	43.658	0		3.0032	86.48855717
1159	2.5961	162.6	101.748	1.9622	-0.398	2084.564103	0.039243949	-0.039796602	20	0	2	43.658	0		3.0064	86.57907649
1160	2.5963	162.81	101.813	1.9632	-0.3975	2087.307692	0.039264099	-0.039750802	20	0	2.0004	43.658	0		3.0144	86.69089449
1161	2.5963	162.96	101.847	1.9637	-0.3969	2089.205128	0.039274799	-0.039689402	20	0	2.0004	43.6581	0		3.0184	86.77076449
1162	2.5964	163.07	101.878	1.9641	-0.3972	2090.666667	0.039282349	-0.039720202	20	0	2	43.6581	0		3.0216	86.82933582
1163	2.5965	163.2	101.911	1.9646	-0.3967	2092.358974	0.039291149	-0.039672002	20	0	1.9996	43.6582	0		3.0256	86.89855648
1164	2.5966	163.34	101.946	1.9652	-0.3966	2094.051282	0.039303149	-0.039658602	20	0	1.9996	43.6582	0		3.0304	86.97310181
1165	2.5967	163.45	101.977	1.9656	-0.3967	2095.512821	0.039311299	-0.039666602	20	0	1.9996	43.6583	0		3.0336	87.03167314
1166	2.5968	163.57	102.011	1.9661	-0.3972	2097	0.039322649	-0.039716202	20	0	2	43.6583	0		3.0376	87.09556914
1167	2.5969	163.71	102.045	1.9665	-0.3971	2098.897436	0.039330849	-0.039710002	20	0	1.9996	43.6583	0		3.0408	87.17011447
1168	2.597	163.84	102.075	1.967	-0.3961	2100.564103	0.039339649	-0.039609802	20	0	2	43.6585	0		3.0448	87.23933513
1169	2.597	163.98	102.109	1.9675	-0.3955	2102.25641	0.039349749	-0.039553802	20	0	2.0004	43.6585	0		3.0488	87.31388047
1170	2.5972	164.21	102.174	1.9683	-0.3954	2105.205128	0.039366749	-0.039538002	20	0	1.9996	43.6585	0		3.0552	87.43634779
1171	2.5973	164.34	102.207	1.9688	-0.395	2106.897436	0.039376799	-0.039503402	20	0	2.0008	43.6585	0		3.0592	87.50556846
1172	2.5975	164.57	102.272	1.9698	-0.3949	2109.846154	0.039395699	-0.039493202	20	0	2	43.6582	0		3.0672	87.62803579
1173	2.5976	164.72	102.304	1.9702	-0.3948	2111.74359	0.039404549	-0.039477402	20	0	2.0004	43.658	0		3.0704	87.70790578
1174	2.5977	164.95	102.37	1.9713	-0.3944	2114.692308	0.039425299	-0.039437202	20	0	2	43.6577	0		3.0792	87.83037311
1175	2.5978	165.08	102.402	1.9717	-0.3941	2116.384615	0.039433499	-0.039414402	20	0	1.9996	43.6576	0		3.0824	87.89959377
1176	2.5979	165.21	102.436	1.9722	-0.394	2118.051282	0.039444199	-0.039398602	20	0	1.9996	43.6575	0		3.0864	87.96881444
1177	2.5981	165.46	102.501	1.9731	-0.3936	2121.230769	0.039461199	-0.039358402	20	0	2.0004	43.6574	0		3.0936	88.1019311
1178	2.5982	165.59	102.534	1.9736	-0.3934	2122.897436	0.039472549	-0.039339402	20	0	2	43.6574	0		3.0976	88.17115176
1179	2.5983	165.82	102.599	1.9745	-0.3928	2125.846154	0.039490799	-0.039283402	20	0	2	43.6572	0		3.1048	88.29361909
1180	2.5984	165.93	102.633	1.9749	-0.3923	2127.333333	0.039498999	-0.039234602	20	0	2	43.6572	0		3.108	88.35219042
1181	2.5985	166.08	102.664	1.9755	-0.394	2129.230769	0.039509699	-0.039395402	20	0	2	43.657	0		3.1128	88.43206042
1182	2.5986	166.19	102.698	1.976	-0.3922	2130.692308	0.039519149	-0.039219602	20	0	2.0004	43.6568	0		3.1168	88.49063175
1183	2.5987	166.33	102.731	1.9765	-0.3923	2132.384615	0.039529849	-0.039226802	20	0	2.0004	43.6566	0		3.1208	88.56517708
1184	2.5988	166.44	102.763	1.977	-0.3922	2133.871795	0.039539949	-0.039217202	20	0	2.0004	43.6565	0		3.1248	88.62374841
1185	2.5989	166.57	102.796	1.9774	-0.3923	2135.538462	0.039547499	-0.039226002	20	0	2.0004	43.6563	0		3.128	88.69296908
1186	2.599	166.7	102.83	1.9779	-0.3919	2137.230769	0.039558199	-0.039190402	20	0	2	43.6561	0		3.132	88.76218974
1187	2.599	166.82	102.861	1.9783	-0.3915	2138.717949	0.039566399	-0.039151002	20	0	2.0004	43.6561	0		3.1352	88.82608574
1188	2.5991	166.95	102.894	1.9788	-0.3913	2140.384615	0.039576449	-0.039128202	20	0	1.9996	43.6561	0		3.1392	88.8953064
1189	2.5992	167.07	102.925	1.9792	-0.3911	2141.871795	0.039584649	-0.039114002	20	0	2.0008	43.6559	0		3.1424	88.9592024
1190	2.5993	167.2	102.959	1.9798	-0.3911	2143.564103	0.039595999	-0.039110002	20	0	2	43.6559	0		3.1472	89.02842306
1191	2.5994	167.35	102.992	1.9803	-0.391	2145.461538	0.039606699	-0.039096602	20	0	2	43.6557	0		3.1512	89.10829306
1192	2.5995	167.46	103.024	1.9808	-0.3909	2146.923077	0.039616149	-0.039085602	20	0	2	43.6555	0		3.1552	89.16686439
1193	2.5996	167.59	103.058	1.9812	-0.3905	2148.615385	0.039624349	-0.039045402	20	0	2.0004	43.6551	0		3.1584	89.23608505
1194	2.5996	167.71	103.089	1.9817	-0.3902	2150.076923	0.039633149	-0.039017002	20	0	2.0004	43.6549	0		3.1624	89.29998105
1195	2.5997	167.82	103.122	1.9823	-0.3902	2151.564103	0.039645099	-0.039015402	20	0	2.0004	43.6547	0		3.1672	89.35855238
1196	2.5998	167.95	103.156	1.9827	-0.3898	2153.25641	0.039653949	-0.038976002	20	0	2.0008	43.6545	0		3.1704	89.42777305
1197	2.5999	168.08	103.188	1.9831	-0.3896	2154.923077	0.039661499	-0.038958002	20	0	2.0004	43.6542	0		3.1736	89.49699371
1198	2.6	168.2	103.221	1.9835	-0.3894	2156.410256	0.039669699	-0.038939002	20	0	1.9996	43.654	0		3.1768	89.56088971
1199	2.6001	168.33	103.254	1.9841	-0.3892	2158.102564	0.039681649	-0.038918602	20	0	2.0004	43.6537	0		3.1816	89.63011037
1200	2.6002	168.46	103.286	1.9845	-0.389	2159.794872	0.039690449	-0.038898802	20	0	2.0004	43.6535	0		3.1848	89.69933104
1201	2.6003	168.58	103.318	1.985	-0.3889	2161.25641	0.039699299	-0.038887802	20	0	2	43.6531	0		3.1888	89.76322703
1202	2.6004	168.82	103.384	1.986	-0.3884	2164.410256	0.039719449	-0.038844402	20	0	2	43.6528	0		3.1968	89.89101903
1203	2.6005	168.96	103.417	1.9863	-0.3883	2166.102564	0.039726999	-0.038831002	20	0	2.0004	43.6528	0		3.1992	89.96556436
1204	2.6007	169.22	103.482	1.9873	-0.3878	2169.487179	0.039745899	-0.038782202	20	0	2.0008	43.6522	0		3.2072	90.10400569
1205	2.6008	169.33	103.515	1.9878	-0.3876	2170.948718	0.039755349	-0.038763202	20	0	2.0004	43.652	0		3.2112	90.16257702
1206	2.601	169.56	103.58	1.9887	-0.3875	2173.897436	0.039774199	-0.038748202	20	0	1.9996	43.6517	0		3.2184	90.28504434
1207	2.601	169.7	103.611	1.9892	-0.3873	2175.589744	0.039783049	-0.038727802	20	0	2.0004	43.6517	0		3.2224	90.35958968
1208	2.6011	169.84	103.644	1.9896	-0.3868	2177.487179	0.039792499	-0.038681202	20	0	2.0004	43.6515	0		3.2256	90.43413501
1209	2.6012	169.98	103.678	1.9901	-0.3867	2179.179487	0.039801949	-0.038671002	20	0	2	43.6515	0		3.2296	90.50868034
1210	2.6013	170.09	103.709	1.9906	-0.3866	2180.641026	0.039811999	-0.038657602	20	0	2	43.6513	0		3.2336	90.56725167
1211	2.6015	170.32	103.775	1.9915	-0.386	2183.589744	0.039830899	-0.038604802	20	0	2	43.6511	0		3.2408	90.689719
1212	2.6016	170.44	103.807	1.992	-0.3859	2185.076923	0.039840999	-0.038585202	20	0	2.0004	43.6511	0		3.2448	90.75361499
1213	2.6016	170.58	103.84	1.9924	-0.3858	2186.974359	0.039848549	-0.038576402	20	0	1.9996	43.6511	0		3.248	90.82816032
1214	2.6017	170.7	103.873	1.9929	-0.3854	2188.435897	0.039858599	-0.038540202	20	0	2	43.6511	0		3.252	90.89205632
1215	2.6018	170.85	103.905	1.9935	-0.3854	2190.333333	0.039869299	-0.038537002	20	0	2.0008	43.6511	0		3.2568	90.97192632
1216	2.6019	170.96	103.938	1.9939	-0.3852	2191.820513	0.039878749	-0.038515802	20	0	2.0004	43.651	0		3.26	91.03049765
1217	2.6021	171.21	104.003	1.9949	-0.3847	2194.974359	0.039897649	-0.038474002	20	0	2	43.6507	0		3.268	91.16361431
1218	2.6022	171.34	104.036	1.9953	-0.3847	2196.666667	0.039905199	-0.038471602	20	0	2.0004	43.6507	0		3.2712	91.23283497
1219	2.6023	171.59	104.101	1.9963	-0.3842	2199.820513	0.039925999	-0.038420402	20	0	1.9996	43.6508	0		3.2792	91.36595163
1220	2.6024	171.72	104.134	1.9969	-0.3838	2201.512821	0.039937949	-0.038377802	20	0	2	43.6508	0		3.284	91.4351723
1221	2.6026	171.96	104.198	1.9977	-0.3836	2204.666667	0.039954349	-0.038364402	20	0	2.0004	43.651	0		3.2904	91.56296429
1222	2.6027	172.08	104.232	1.9982	-0.3834	2206.128205	0.039963149	-0.038340002	20	0	1.9996	43.6512	0		3.2944	91.62686029
1223	2.6028	172.19	104.263	1.9986	-0.3832	2207.615385	0.039971999	-0.038318602	20	0	1.9996	43.6512	0		3.2976	91.68543162
1224	2.6029	172.31	104.297	1.9991	-0.383	2209.076923	0.039982699	-0.038299802	20	0	1.9996	43.6512	0		3.3016	91.74932762
1225	2.6029	172.44	104.328	1.9995	-0.3827	2210.769231	0.039990899	-0.038273802	20	0	1.9992	43.6515	0		3.3048	91.81854828
1226	2.603	172.57	104.361	2.0001	-0.3823	2212.461538	0.040002199	-0.038232002	20	0	1.9996	43.6519	0		3.3096	91.88776895
1227	2.6031	172.69	104.392	2.0006	-0.3825	2213.923077	0.040011649	-0.038247802	20	0	2	43.652	0		3.3136	91.95166494
1228	2.6032	172.83	104.426	2.0011	-0.3824	2215.820513	0.040021099	-0.038239802	20	0	2.0004	43.6521	0		3.3176	92.02621027
1229	2.6033	172.97	104.459	2.0016	-0.3821	2217.512821	0.040031199	-0.038213002	20	0	2	43.6521	0		3.3216	92.1007556
1230	2.6035	173.18	104.524	2.0024	-0.3817	2220.25641	0.040048199	-0.038172002	20	0	2	43.6523	0		3.328	92.2125736
1231	2.6036	173.33	104.557	2.0029	-0.3815	2222.153846	0.040058249	-0.038150002	20	0	2	43.6524	0		3.332	92.2924436
1232	2.6036	173.44	104.588	2.0034	-0.3814	2223.615385	0.040067699	-0.038144402	20	0	2	43.6527	0		3.336	92.35101493
1233	2.6037	173.56	104.622	2.0039	-0.3811	2225.102564	0.040078399	-0.038105802	20	0	2	43.6528	0		3.34	92.41491093
1234	2.6038	173.69	104.654	2.0044	-0.381	2226.794872	0.040088499	-0.038102802	20	0	1.9988	43.6532	0		3.344	92.48413159
1235	2.6039	173.84	104.688	2.0049	-0.3804	2228.692308	0.040097949	-0.038042802	20	0	2	43.6532	0		3.348	92.56400159
1236	2.6041	174.08	104.753	2.0059	-0.3804	2231.846154	0.040117449	-0.038035002	20	0	2.0004	43.6537	0		3.356	92.69179358
1237	2.6042	174.2	104.786	2.0064	-0.3801	2233.307692	0.040127549	-0.038012802	20	0	1.9992	43.6537	0		3.36	92.75568958
1238	2.6042	174.33	104.819	2.0067	-0.3797	2235	0.040134449	-0.037970202	20	0	1.9996	43.6537	0		3.3624	92.82491024
1239	2.6043	174.45	104.85	2.0072	-0.3798	2236.487179	0.040144549	-0.037982202	20	0	2	43.6539	0		3.3664	92.88880624
1240	2.6044	174.56	104.884	2.0078	-0.3798	2237.948718	0.040155249	-0.037978202	20	0	1.9996	43.6539	0		3.3712	92.94737757
1241	2.6045	174.68	104.915	2.0082	-0.3793	2239.435897	0.040164699	-0.037930802	20	0	2	43.654	0		3.3744	93.01127357
1242	2.6046	174.82	104.948	2.0087	-0.3789	2241.333333	0.040174149	-0.037886002	20	0	1.9996	43.6541	0		3.3784	93.0858189
1243	2.6049	174.97	105.004	2.0097	-0.3786	2243.230769	0.040193649	-0.037864602	20	0	1.9996	43.6543	0		3.3864	93.16568889
1244	2.6052	175.09	105.062	2.0107	-0.3782	2244.692308	0.040214449	-0.037822202	20	0	1.9996	43.6548	0		3.3944	93.22958489
1245	2.6055	175.22	105.112	2.0115	-0.3779	2246.384615	0.040230849	-0.037785002	20	0	2.0004	43.655	0		3.4008	93.29880556
1246	2.6056	175.38	105.152	2.0122	-0.3776	2248.487179	0.040243399	-0.037757402	20	0	2	43.6549	0		3.4064	93.38400022
1247	2.6058	175.53	105.196	2.0128	-0.3774	2250.384615	0.040255999	-0.037744802	20	0	1.9996	43.6547	0		3.4112	93.46387022
1248	2.606	175.73	105.244	2.0135	-0.3771	2252.923077	0.040270499	-0.037711002	20	0	2.0008	43.6546	0		3.4168	93.57036355
1249	2.6062	175.94	105.297	2.0142	-0.3768	2255.666667	0.040284999	-0.037677002	20	0	2	43.6544	0		3.4224	93.68218154
1250	2.6063	176.19	105.358	2.0151	-0.3763	2258.820513	0.040301999	-0.037629002	20	0	2	43.654	0		3.4296	93.8152982
1251	2.6065	176.42	105.421	2.0161	-0.376	2261.769231	0.040322799	-0.037600602	20	0	2	43.6537	0		3.4376	93.93776553
1252	2.6066	176.57	105.454	2.0165	-0.3759	2263.666667	0.040329099	-0.037588002	20	0	2.0004	43.6536	0		3.4408	94.01763553
1253	2.6067	176.73	105.49	2.017	-0.3756	2265.769231	0.040339799	-0.037564402	20	0	2.0012	43.6536	0		3.4448	94.10283019
1254	2.6068	176.89	105.528	2.0176	-0.3754	2267.871795	0.040351099	-0.037542202	20	0	2.0004	43.6531	0		3.4496	94.18802485
1255	2.6069	177.03	105.565	2.018	-0.3751	2269.564103	0.040359949	-0.037512402	20	0	2	43.653	0		3.4528	94.26257018
1256	2.6069	177.21	105.605	2.0185	-0.3751	2271.871795	0.040370649	-0.037508402	20	0	2.0004	43.653	0		3.4568	94.35841418
1257	2.607	177.37	105.647	2.0192	-0.3746	2273.974359	0.040383249	-0.037457202	20	0	2	43.653	0		3.4624	94.44360884
1258	2.6071	177.58	105.688	2.0198	-0.3746	2276.717949	0.040395849	-0.037460402	20	0	2	43.6529	0		3.4672	94.55542684
1259	2.6072	177.75	105.732	2.0204	-0.3744	2278.820513	0.040407149	-0.037439002	20	0	1.9996	43.6529	0		3.472	94.64594617
1260	2.6073	177.96	105.779	2.0211	-0.374	2281.564103	0.040421049	-0.037398802	20	0	1.9996	43.6529	0		3.4776	94.75776416
1261	2.6074	178.13	105.822	2.0216	-0.3736	2283.666667	0.040432999	-0.037358602	20	0	1.9996	43.6529	0		3.4816	94.84828349
1262	2.6075	178.36	105.872	2.0223	-0.3737	2286.641026	0.040446199	-0.037374402	20	0	2	43.6529	0		3.4872	94.97075082
1263	2.6075	178.57	105.918	2.023	-0.3734	2289.358974	0.040460699	-0.037341202	20	0	2	43.6527	0		3.4928	95.08256882
1264	2.6076	178.8	105.97	2.0236	-0.3732	2292.307692	0.040472049	-0.037317602	20	0	2	43.6527	0		3.4976	95.20503615
1265	2.6077	179.03	106.023	2.0245	-0.3729	2295.25641	0.040489699	-0.037288402	20	0	2.0004	43.6525	0		3.5048	95.32750347
1266	2.6078	179.24	106.075	2.0251	-0.3725	2298	0.040501649	-0.037250602	20	0	2	43.6524	0		3.5096	95.43932147
1267	2.6079	179.49	106.131	2.0259	-0.3723	2301.179487	0.040518649	-0.037234002	20	0	2	43.6523	0		3.516	95.57243813
1268	2.608	179.74	106.186	2.0267	-0.372	2304.333333	0.040533149	-0.037197802	20	0	2.0004	43.6522	0		3.5224	95.70555479
1269	2.6081	179.98	106.245	2.0276	-0.3717	2307.487179	0.040552049	-0.037165602	20	0	2	43.6522	0		3.5296	95.83334679
1270	2.6082	180.23	106.306	2.0284	-0.3716	2310.641026	0.040567149	-0.037163202	20	0	2	43.652	0		3.536	95.96646345
1271	2.6082	180.48	106.364	2.0292	-0.3711	2313.820513	0.040584749	-0.037109602	20	0	2	43.6519	0		3.5424	96.09958011
1272	2.6083	180.77	106.428	2.0301	-0.3706	2317.615385	0.040601149	-0.037063002	20	0	2	43.6517	0		3.5496	96.25399544
1273	2.6084	181.04	106.494	2.031	-0.3704	2320.974359	0.040620649	-0.037043402	20	0	2.0004	43.6515	0		3.5568	96.39776143
1274	2.6085	181.33	106.558	2.0319	-0.37	2324.769231	0.040638299	-0.037002402	20	0	2	43.6512	0		3.564	96.55217676
1275	2.6086	181.63	106.626	2.0328	-0.3696	2328.564103	0.040656549	-0.036960602	20	0	2.0012	43.6512	0		3.5712	96.71191675
1276	2.6087	181.92	106.692	2.0338	-0.3693	2332.358974	0.040676099	-0.036926602	20	0	1.9996	43.6512	0		3.5792	96.86633208
1277	2.6088	182.2	106.764	2.0348	-0.3689	2335.923077	0.040695599	-0.036888002	20	0	2	43.6511	0		3.5872	97.01542274
1278	2.6089	182.52	106.837	2.0359	-0.3685	2339.948718	0.040718299	-0.036852602	20	0	2.0004	43.6511	0		3.596	97.18581207
1279	2.6089	182.83	106.907	2.0369	-0.3681	2343.948718	0.040737199	-0.036812402	20	0	2	43.6509	0		3.604	97.35087673
1280	2.609	183.14	106.982	2.038	-0.3677	2347.948718	0.040759849	-0.036770602	20	0	2.0004	43.6508	0		3.6128	97.51594139
1281	2.6091	183.47	107.06	2.0391	-0.3671	2352.153846	0.040782549	-0.036713002	20	0	2.0004	43.6506	0		3.6216	97.69165538
1282	2.6092	183.78	107.134	2.0401	-0.367	2356.153846	0.040802699	-0.036700402	20	0	2.0004	43.6506	0		3.6296	97.85672004
1283	2.6093	184.13	107.215	2.0412	-0.3664	2360.589744	0.040824749	-0.036641402	20	0	2	43.6506	0		3.6384	98.04308336
1284	2.6094	184.47	107.297	2.0426	-0.3659	2365.025641	0.040851799	-0.036592402	20	0	1.9996	43.6506	0		3.6496	98.22412202
1285	2.6095	184.8	107.376	2.0436	-0.3655	2369.230769	0.040871349	-0.036554602	20	0	1.9992	43.6507	0		3.6576	98.39983602
1286	2.6095	185.19	107.461	2.0448	-0.365	2374.282051	0.040896499	-0.036503402	20	0	1.9996	43.6508	0		3.6672	98.60749801
1287	2.6096	185.51	107.543	2.046	-0.3646	2378.282051	0.040919849	-0.036458402	20	0	2	43.6509	0		3.6768	98.77788733
1288	2.6097	185.9	107.631	2.0473	-0.3641	2383.333333	0.040945649	-0.036410402	20	0	1.9996	43.6509	0		3.6872	98.98554933
1289	2.6098	186.28	107.722	2.0486	-0.3636	2388.179487	0.040971449	-0.036360002	20	0	1.9992	43.6512	0		3.6976	99.18788665
1290	2.6099	186.62	107.807	2.0498	-0.3631	2392.615385	0.040996049	-0.036310202	20	0	2	43.6512	0		3.7072	99.36892531
1291	2.61	187.02	107.901	2.0512	-0.3625	2397.666667	0.041023749	-0.036250402	20	0	1.9996	43.6512	0		3.7184	99.58191197
1292	2.6101	187.43	107.996	2.0526	-0.362	2402.948718	0.041051449	-0.036200002	20	0	1.9996	43.6513	0		3.7296	99.80022329
1293	2.6102	187.77	108.086	2.054	-0.3614	2407.358974	0.041080449	-0.036143202	20	0	2.0004	43.6513	0		3.7408	99.98126195
1294	2.6102	188.22	108.184	2.0553	-0.3609	2413.051282	0.041105599	-0.036092002	20	0	2	43.6513	0		3.7512	100.2208719
1295	2.6103	188.6	108.278	2.0567	-0.3604	2417.897436	0.041133949	-0.036037602	20	0	2	43.6513	0		3.7624	100.4232093
1296	2.6104	189.04	108.378	2.0582	-0.3596	2423.589744	0.041164799	-0.035963402	20	0	2	43.6513	0		3.7744	100.6574946
1297	2.6105	189.42	108.48	2.0596	-0.359	2428.435897	0.041191899	-0.035898802	20	0	2.0008	43.6514	0		3.7856	100.8598319
1298	2.6106	189.85	108.577	2.061	-0.3586	2433.923077	0.041220849	-0.035855402	20	0	2	43.6514	0		3.7968	101.0887926
1299	2.6107	190.27	108.681	2.0627	-0.358	2439.384615	0.041254249	-0.035797202	20	0	2	43.6514	0		3.8104	101.3124286
1300	2.6108	190.68	108.78	2.0641	-0.3574	2444.666667	0.041282599	-0.035735602	20	0	2	43.6514	0		3.8216	101.5307399
1301	2.6108	191.13	108.888	2.0658	-0.3566	2450.358974	0.041315349	-0.035660002	20	0	2	43.6514	0		3.8352	101.7703499
1302	2.6109	191.57	108.997	2.0673	-0.3559	2456.051282	0.041346199	-0.035593002	20	0	2.0004	43.6515	0		3.8472	102.0046352
1303	2.611	192.01	109.101	2.0688	-0.3556	2461.717949	0.041376449	-0.035556002	20	0	1.9996	43.6515	0		3.8592	102.2389205
1304	2.6111	192.44	109.213	2.0706	-0.3549	2467.205128	0.041412349	-0.035493602	20	0	1.9996	43.6517	0		3.8736	102.4678812
1305	2.6112	192.94	109.325	2.0723	-0.3542	2473.538462	0.041445699	-0.035417202	20	0	2	43.6518	0		3.8872	102.7341145
1306	2.6113	193.38	109.434	2.0739	-0.3536	2479.205128	0.041477199	-0.035358202	20	0	2	43.6519	0		3.9	102.9683998
1307	2.6114	193.82	109.549	2.0757	-0.3527	2484.897436	0.041513099	-0.035270602	20	0	2	43.652	0		3.9144	103.2026852
1308	2.6115	194.35	109.667	2.0774	-0.352	2491.641026	0.041547099	-0.035197402	20	0	2	43.6521	0		3.928	103.4848925
1309	2.6115	194.79	109.779	2.0791	-0.3516	2497.333333	0.041582999	-0.035157202	20	0	1.9996	43.6524	0		3.9416	103.7191778
1310	2.6116	195.29	109.899	2.0809	-0.3507	2503.666667	0.041618899	-0.035067202	20	0	1.9992	43.6525	0		3.956	103.9854111
1311	2.6117	195.75	110.014	2.0827	-0.3499	2509.564103	0.041653549	-0.034986802	20	0	2	43.653	0		3.9704	104.2303458
1312	2.6118	196.26	110.137	2.0846	-0.349	2516.102564	0.041691949	-0.034895402	20	0	1.9996	43.6531	0		3.9856	104.5019038
1313	2.6119	196.76	110.26	2.0865	-0.3485	2522.615385	0.041729099	-0.034845002	20	0	2	43.6533	0		4.0008	104.7681371
1314	2.612	197.26	110.378	2.0882	-0.3475	2528.948718	0.041764999	-0.034751202	20	0	2	43.6533	0		4.0144	105.0343704
1315	2.6121	197.73	110.505	2.0903	-0.3466	2535.051282	0.041806599	-0.034658202	20	0	2	43.6533	0		4.0312	105.2846297
1316	2.6121	198.24	110.633	2.0921	-0.3462	2541.589744	0.041842499	-0.034620402	20	0	2	43.6533	0		4.0456	105.5561877
1317	2.6122	198.75	110.754	2.094	-0.3453	2548.128205	0.041880899	-0.034525002	20	0	1.9992	43.6534	0		4.0608	105.8277457
1318	2.6123	199.31	110.884	2.0961	-0.3445	2555.282051	0.041921849	-0.034451602	20	0	2.0004	43.6534	0		4.0776	106.125927
1319	2.6124	199.81	111.007	2.098	-0.3438	2561.615385	0.041960249	-0.034378402	20	0	2	43.6534	0		4.0928	106.3921604
1320	2.6125	200.31	111.139	2.1	-0.3429	2568.128205	0.042000549	-0.034291602	20	0	2	43.6534	0		4.1088	106.6583937
1321	2.6126	200.86	111.274	2.1022	-0.3423	2575.102564	0.042043999	-0.034234802	20	0	1.9996	43.6534	0		4.1264	106.9512503
1322	2.6127	201.4	111.4	2.1041	-0.3413	2582.051282	0.042081799	-0.034131602	20	0	2	43.6534	0		4.1416	107.2387823
1323	2.6128	201.94	111.536	2.1062	-0.3404	2589	0.042123349	-0.034043402	20	0	2.0004	43.6533	0		4.1584	107.5263143
1324	2.6128	202.45	111.664	2.1081	-0.3396	2595.538462	0.042162399	-0.033957402	20	0	2.0004	43.6532	0		4.1736	107.7978723
1325	2.6129	203.01	111.803	2.1104	-0.3387	2602.692308	0.042207749	-0.033870802	20	0	2.0004	43.6531	0		4.192	108.0960536
1326	2.613	203.59	111.943	2.1127	-0.3376	2610.076923	0.042253099	-0.033763602	20	0	2.0004	43.6528	0		4.2104	108.4048843
1327	2.6131	204.14	112.075	2.1146	-0.3367	2617.230769	0.042292149	-0.033668202	20	0	2.0004	43.6526	0		4.2256	108.6977409
1328	2.6132	204.69	112.217	2.1168	-0.3361	2624.179487	0.042336849	-0.033609802	20	0	2	43.6525	0		4.2432	108.9905976
1329	2.6133	205.28	112.36	2.1191	-0.3351	2631.769231	0.042382849	-0.033513602	20	0	2.0004	43.6523	0		4.2616	109.3047529
1330	2.6134	205.82	112.495	2.1213	-0.3343	2638.717949	0.042425649	-0.033427002	20	0	2.0004	43.6521	0		4.2792	109.5922849
1331	2.6135	206.4	112.64	2.1235	-0.3333	2646.102564	0.042470999	-0.033332402	20	0	2.0008	43.6519	0		4.2968	109.9011156
1332	2.6135	206.97	112.777	2.1257	-0.3324	2653.461538	0.042514449	-0.033244802	20	0	2	43.6518	0		4.3144	110.2046215
1333	2.6136	207.51	112.925	2.1281	-0.3315	2660.435897	0.042562349	-0.033147202	20	0	2.0004	43.6518	0		4.3336	110.4921535
1334	2.6137	208.14	113.074	2.1304	-0.3305	2668.435897	0.042607699	-0.033051802	20	0	2	43.6518	0		4.352	110.8276075
1335	2.6138	208.71	113.213	2.1327	-0.3296	2675.820513	0.042653649	-0.032959602	20	0	2.0004	43.6517	0		4.3704	111.1311135
1336	2.6139	209.3	113.363	2.135	-0.3286	2683.384615	0.042700249	-0.032864202	20	0	2	43.6516	0		4.3888	111.4452688
1337	2.614	209.91	113.514	2.1374	-0.3276	2691.179487	0.042748749	-0.032762402	20	0	1.9996	43.6515	0		4.408	111.7700735
1338	2.6141	210.47	113.656	2.1398	-0.3264	2698.358974	0.042796599	-0.032641802	20	0	2.0004	43.6513	0		4.4272	112.0682548
1339	2.6141	211.1	113.809	2.1423	-0.3257	2706.358974	0.042846399	-0.032566202	20	0	2.0008	43.6512	0		4.4472	112.4037088
1340	2.6142	211.69	113.963	2.1449	-0.3247	2713.948718	0.042897399	-0.032465402	20	0	2.0012	43.6508	0		4.468	112.7178641
1341	2.6143	212.3	114.108	2.1471	-0.3237	2721.74359	0.042942749	-0.032370802	20	0	2.0008	43.6505	0		4.4856	113.0426688
1342	2.6144	212.92	114.264	2.1496	-0.3227	2729.74359	0.042991849	-0.032266602	20	0	2	43.6503	0		4.5056	113.3727981
1343	2.6145	213.5	114.411	2.152	-0.3217	2737.128205	0.043040999	-0.032170602	20	0	2.0008	43.65	0		4.5248	113.6816287
1344	2.6146	214.14	114.569	2.1546	-0.3207	2745.333333	0.043092649	-0.032066402	20	0	2.0008	43.6496	0		4.5456	114.0224074
1345	2.6147	214.78	114.727	2.1572	-0.3196	2753.564103	0.043144899	-0.031957802	20	0	2	43.6491	0		4.5664	114.363186
1346	2.6148	215.34	114.876	2.1596	-0.3186	2760.717949	0.043192749	-0.031858402	20	0	2.0004	43.6488	0		4.5856	114.6613674
1347	2.6148	215.99	115.035	2.1622	-0.3175	2769.153846	0.043244399	-0.031747202	20	0	2	43.6485	0		4.6064	115.0074707
1348	2.6149	216.6	115.186	2.1647	-0.3167	2776.948718	0.043294799	-0.031671602	20	0	2.0004	43.6482	0		4.6264	115.3322753
1349	2.615	217.26	115.347	2.1674	-0.3154	2785.384615	0.043348349	-0.031540801	20	0	2.0008	43.6479	0		4.648	115.6837033
1350	2.6151	217.9	115.509	2.17	-0.3143	2793.589744	0.043400599	-0.031432001	20	0	2	43.6477	0		4.6688	116.024482
1351	2.6152	218.49	115.662	2.1726	-0.3133	2801.179487	0.043452249	-0.031331001	20	0	2.0004	43.6476	0		4.6896	116.3386373
1352	2.6153	219.12	115.826	2.1753	-0.3122	2809.179487	0.043506399	-0.031216001	20	0	2	43.6476	0		4.7112	116.6740913
1353	2.6154	219.81	115.991	2.178	-0.3111	2818.025641	0.043559949	-0.031108001	20	0	2	43.6474	0		4.7328	117.0414933
1354	2.6154	220.42	116.145	2.1805	-0.31	2825.846154	0.043610949	-0.031002401	20	0	2	43.6472	0		4.7528	117.3662979
1355	2.6155	221.07	116.311	2.1833	-0.3089	2834.25641	0.043665749	-0.030891201	20	0	2	43.6469	0		4.7752	117.7124012
1356	2.6156	221.7	116.467	2.1859	-0.3079	2842.282051	0.043718649	-0.030788001	20	0	2	43.6469	0		4.796	118.0478552
1357	2.6157	222.37	116.634	2.1887	-0.3068	2850.897436	0.043773449	-0.030676801	20	0	2.0004	43.6467	0		4.8184	118.4046079
1358	2.6158	223.04	116.802	2.1915	-0.3056	2859.538462	0.043829499	-0.030559401	20	0	2	43.6467	0		4.8408	118.7613605
1359	2.6159	223.65	116.96	2.1941	-0.3045	2867.333333	0.043882399	-0.030451401	20	0	2.0004	43.6466	0		4.8616	119.0861652
1360	2.616	224.31	117.129	2.1969	-0.3034	2875.769231	0.043938449	-0.030338001	20	0	2	43.6466	0		4.884	119.4375932
1361	2.6161	225.02	117.298	2.1998	-0.3022	2884.820513	0.043995149	-0.030218001	20	0	1.9996	43.6466	0		4.9072	119.8156445
1362	2.6161	225.64	117.459	2.2025	-0.3013	2892.846154	0.044049299	-0.030125801	20	0	1.9996	43.6466	0		4.9288	120.1457738
1363	2.6162	226.3	117.629	2.2054	-0.3004	2901.25641	0.044107249	-0.030035201	20	0	2	43.6466	0		4.952	120.4972018
1364	2.6163	226.97	117.801	2.2083	-0.2988	2909.897436	0.044165149	-0.029876801	20	0	2.0004	43.6463	0		4.9752	120.8539544
1365	2.6164	227.63	117.962	2.211	-0.2977	2918.333333	0.044219949	-0.029765601	20	0	1.9996	43.6464	0		4.9968	121.2053824
1366	2.6165	228.3	118.134	2.2139	-0.2965	2926.974359	0.044277299	-0.029648201	20	0	2	43.6464	0		5.02	121.5621351
1367	2.6166	228.93	118.295	2.2165	-0.2953	2934.974359	0.044330199	-0.029534001	20	0	2.0004	43.6465	0		5.0408	121.8975891
1368	2.6167	229.62	118.469	2.2195	-0.2942	2943.820513	0.044389999	-0.029418801	20	0	2	43.6467	0		5.0648	122.2649911
1369	2.6167	230.31	118.643	2.2225	-0.293	2952.692308	0.044449199	-0.029297401	20	0	1.9996	43.6468	0		5.0888	122.632393
1370	2.6168	230.93	118.806	2.2253	-0.2918	2960.692308	0.044505249	-0.029181601	20	0	1.9996	43.647	0		5.1112	122.9625224
1371	2.6169	231.66	118.981	2.2283	-0.2907	2969.948718	0.044565099	-0.029070401	20	0	2	43.647	0		5.1352	123.351223
1372	2.617	232.35	119.156	2.2312	-0.2893	2978.820513	0.044624949	-0.028929401	20	0	2	43.647	0		5.1584	123.718625
1373	2.6171	232.99	119.321	2.234	-0.2883	2987.025641	0.044680349	-0.028825401	20	0	1.9992	43.6471	0		5.1808	124.0594036
1374	2.6172	233.69	119.496	2.2371	-0.287	2996.076923	0.044742699	-0.028700001	20	0	1.9996	43.6471	0		5.2056	124.4321303
1375	2.6173	234.34	119.661	2.24	-0.2858	3004.307692	0.044799399	-0.028580201	20	0	2	43.6471	0		5.2288	124.7782336
1376	2.6174	235.01	119.837	2.243	-0.2844	3012.948718	0.044859199	-0.028437401	20	0	2	43.647	0		5.2528	125.1349863
1377	2.6174	235.73	120.014	2.246	-0.2834	3022.205128	0.044920949	-0.028341401	20	0	1.9996	43.647	0		5.2768	125.5183623
1378	2.6175	236.39	120.181	2.249	-0.2822	3030.641026	0.044980149	-0.028220001	20	0	2	43.647	0		5.3008	125.8697902
1379	2.6176	237.08	120.358	2.2521	-0.281	3039.487179	0.045041199	-0.028097001	20	0	2.0008	43.647	0		5.3256	126.2371922
1380	2.6177	237.72	120.524	2.2548	-0.2797	3047.717949	0.045095999	-0.027974001	20	0	2	43.647	0		5.3472	126.5779709
1381	2.6178	238.43	120.701	2.2581	-0.2786	3056.769231	0.045161499	-0.027856601	20	0	2	43.647	0		5.3736	126.9560222
1382	2.6179	239.15	120.878	2.2611	-0.2773	3066.051282	0.045221999	-0.027727401	20	0	2	43.647	0		5.3976	127.3393982
1383	2.618	239.81	121.045	2.2641	-0.2761	3074.461538	0.045282449	-0.027609001	20	0	2.0004	43.647	0		5.4216	127.6908262
1384	2.6181	240.5	121.223	2.2672	-0.2748	3083.333333	0.045344149	-0.027483801	20	0	2	43.647	0		5.4464	128.0582281
1385	2.6181	241.19	121.401	2.2703	-0.2736	3092.179487	0.045406499	-0.027364001	20	0	2.0008	43.647	0		5.4712	128.4256301
1386	2.6182	241.86	121.568	2.2733	-0.2724	3100.820513	0.045465699	-0.027239401	20	0	2.0008	43.647	0		5.4952	128.7823828
1387	2.6183	242.54	121.746	2.2765	-0.271	3109.461538	0.045529949	-0.027103801	20	0	2.0004	43.6467	0		5.5208	129.1444601
1388	2.6184	243.21	121.915	2.2794	-0.2698	3118.076923	0.045587899	-0.026984801	20	0	2.0004	43.6465	0		5.544	129.5012128
1389	2.6185	243.92	122.094	2.2826	-0.2685	3127.153846	0.045651499	-0.026853201	20	0	2.0004	43.6462	0		5.5696	129.8792641
1390	2.6186	244.61	122.271	2.2858	-0.2673	3136	0.045715099	-0.026725401	20	0	1.9996	43.6459	0		5.5952	130.2466661
1391	2.6187	245.27	122.438	2.2887	-0.2661	3144.435897	0.045774299	-0.026605601	20	0	2.0004	43.6458	0		5.6184	130.598094
1392	2.6187	245.96	122.618	2.292	-0.2647	3153.282051	0.045839199	-0.026473201	20	0	2.0008	43.6456	0		5.6448	130.965496
1393	2.6188	246.66	122.796	2.2952	-0.2634	3162.333333	0.045903399	-0.026344001	20	0	2.0008	43.6454	0		5.6704	131.3382227
1394	2.6189	247.3	122.964	2.2982	-0.2624	3170.564103	0.045964499	-0.026238401	20	0	2	43.6453	0		5.6944	131.6790013
1395	2.619	248.06	123.143	2.3012	-0.2609	3180.25641	0.046024949	-0.026094801	20	0	2	43.6452	0		5.7184	132.083676
1396	2.6191	248.72	123.311	2.3045	-0.2598	3188.666667	0.046089199	-0.025975001	20	0	1.9992	43.6451	0		5.7448	132.435104
1397	2.6192	249.37	123.49	2.3076	-0.2585	3197.102564	0.046151549	-0.025849801	20	0	2	43.6451	0		5.7696	132.7812073
1398	2.6193	250.08	123.669	2.3109	-0.2572	3206.153846	0.046218949	-0.025716601	20	0	2	43.645	0		5.796	133.1592586
1399	2.6194	250.75	123.837	2.3139	-0.2559	3214.794872	0.046278149	-0.025591201	20	0	2	43.6449	0		5.82	133.5160113
1400	2.6194	251.45	124.017	2.3171	-0.2546	3223.666667	0.046342999	-0.025463601	20	0	1.9996	43.6448	0		5.8456	133.8887379
1401	2.6195	252.17	124.196	2.3205	-0.2533	3232.923077	0.046409149	-0.025330401	20	0	2.0008	43.6446	0		5.8728	134.2721139
1402	2.6196	252.81	124.365	2.3235	-0.2522	3241.153846	0.046470249	-0.025216001	20	0	2	43.6446	0		5.8968	134.6128926
1403	2.6197	253.48	124.545	2.3267	-0.2505	3249.769231	0.046533849	-0.025047401	20	0	2	43.6446	0		5.9224	134.9696452
1404	2.6198	254.21	124.725	2.33	-0.2494	3259.051282	0.046599949	-0.024941801	20	0	2.0004	43.6446	0		5.9488	135.3583459
1405	2.6199	254.83	124.894	2.3331	-0.2482	3267.051282	0.046662299	-0.024818001	20	0	2.0004	43.6445	0		5.9736	135.6884752
1406	2.62	255.54	125.073	2.3364	-0.2474	3276.128205	0.046728449	-0.024740001	20	0	2.0004	43.6444	0		6	136.0665265
1407	2.62	256.21	125.242	2.3394	-0.2457	3284.769231	0.046788899	-0.024569601	20	0	1.9996	43.6442	0		6.024	136.4232791
1408	2.6201	256.89	125.419	2.3427	-0.2442	3293.410256	0.046854399	-0.024415201	20	0	2.0004	43.6442	0		6.0504	136.7853565
1409	2.6202	257.59	125.599	2.3461	-0.2431	3302.461538	0.046921799	-0.024308801	20	0	2	43.6441	0		6.0776	137.1580831
1410	2.6203	258.2	125.766	2.3491	-0.2419	3310.25641	0.046981649	-0.024188201	20	0	2	43.644	0		6.1016	137.4828878
1411	2.6204	258.91	125.944	2.3524	-0.2409	3319.307692	0.047047149	-0.024088801	20	0	2.0008	43.6439	0		6.128	137.8609391
1412	2.6205	259.56	126.111	2.3555	-0.2393	3327.74359	0.047110099	-0.023932001	20	0	2	43.6436	0		6.1528	138.2070424
1413	2.6206	260.24	126.289	2.3588	-0.238	3336.384615	0.047176249	-0.023799601	20	0	2.0004	43.6432	0		6.1792	138.5691197
1414	2.6207	260.96	126.467	2.3621	-0.2367	3345.666667	0.047242349	-0.023666401	20	0	2	43.6432	0		6.2056	138.9524957
1415	2.6207	261.59	126.633	2.3653	-0.2355	3353.666667	0.047305999	-0.023545001	20	0	2.0004	43.6432	0		6.2312	139.2879497
1416	2.6208	262.26	126.809	2.3685	-0.2338	3362.307692	0.047370849	-0.023375601	20	0	2.0008	43.6432	0		6.2568	139.6447023
1417	2.6209	262.93	126.985	2.3718	-0.2328	3370.948718	0.047436349	-0.023280201	20	0	2.0004	43.6431	0		6.2832	140.001455
1418	2.621	263.57	127.15	2.3749	-0.2316	3379.153846	0.047498049	-0.023158801	20	0	2.0008	43.6428	0		6.308	140.3422337
1419	2.6211	264.23	127.325	2.3781	-0.2303	3387.589744	0.047562299	-0.023027201	20	0	2.0004	43.6425	0		6.3336	140.6936616
1420	2.6212	264.91	127.49	2.3814	-0.2291	3396.230769	0.047627149	-0.022908001	20	0	2	43.6425	0		6.36	141.055739
1421	2.6213	265.56	127.664	2.3846	-0.2277	3404.641026	0.047691399	-0.022773401	20	0	2.0004	43.6424	0		6.3856	141.4018423
1422	2.6214	266.2	127.838	2.3879	-0.2266	3412.871795	0.047757549	-0.022655801	20	0	2.0012	43.6422	0		6.412	141.7426209
1423	2.6214	266.86	128.002	2.391	-0.2253	3421.307692	0.047819249	-0.022525801	20	0	2	43.6421	0		6.4368	142.0940489
1424	2.6215	267.52	128.175	2.3943	-0.224	3429.717949	0.047885999	-0.022395001	20	0	2	43.642	0		6.4632	142.4454769
1425	2.6216	268.19	128.347	2.3975	-0.2227	3438.358974	0.047949649	-0.022265601	20	0	2	43.642	0		6.4888	142.8022296
1426	2.6217	268.8	128.509	2.4006	-0.2215	3446.153846	0.048011349	-0.022149001	20	0	2.0004	43.642	0		6.5136	143.1270342
1427	2.6218	269.47	128.68	2.4039	-0.2203	3454.794872	0.048077499	-0.022033201	20	0	2	43.642	0		6.54	143.4837869
1428	2.6219	270.12	128.851	2.4072	-0.2188	3463.025641	0.048143599	-0.021883401	20	0	1.9996	43.6417	0		6.5664	143.8298902
1429	2.622	270.72	129.011	2.4101	-0.2177	3470.820513	0.048202199	-0.021765201	20	0	2	43.6416	0		6.5896	144.1493702
1430	2.622	271.4	129.181	2.4134	-0.2164	3479.461538	0.048268949	-0.021639001	20	0	2.0004	43.6416	0		6.616	144.5114475
1431	2.6221	272.01	129.34	2.4163	-0.2151	3487.25641	0.048326899	-0.021514601	20	0	2	43.6416	0		6.6392	144.8362521
1432	2.6222	272.68	129.509	2.4198	-0.2139	3495.897436	0.048395549	-0.021386001	20	0	1.9996	43.6416	0		6.6672	145.1930048
1433	2.6223	273.29	129.677	2.423	-0.2127	3503.692308	0.048459149	-0.021266201	20	0	1.9996	43.6417	0		6.6928	145.5178094
1434	2.6224	273.9	129.834	2.426	-0.2114	3511.487179	0.048520249	-0.021139401	20	0	1.9996	43.6417	0		6.7168	145.8426141
1435	2.6225	274.52	130.002	2.4292	-0.2101	3519.487179	0.048584449	-0.021010801	20	0	2	43.6417	0		6.7424	146.1727434
1436	2.6226	275.11	130.158	2.4322	-0.2089	3527.076923	0.048644949	-0.020890201	20	0	2	43.6417	0		6.7664	146.4868987
1437	2.6227	275.75	130.323	2.4355	-0.2077	3535.282051	0.048709799	-0.020765601	20	0	2	43.6417	0		6.7928	146.8276774
1438	2.6227	276.43	130.489	2.4387	-0.2064	3543.923077	0.048774649	-0.020638001	20	0	2	43.6416	0		6.8184	147.1897547
1439	2.6228	276.99	130.642	2.4416	-0.2052	3551.102564	0.048832599	-0.020521401	20	0	1.9996	43.6416	0		6.8416	147.487936
1440	2.6229	277.61	130.806	2.4448	-0.204	3559.102564	0.048896849	-0.020395201	20	0	1.9996	43.6416	0		6.8672	147.8180653
1441	2.623	278.22	130.968	2.4481	-0.2027	3566.897436	0.048961699	-0.020270001	20	0	2	43.6414	0		6.8936	148.14287
1442	2.6231	278.81	131.12	2.4511	-0.2014	3574.487179	0.049022199	-0.020142201	20	0	2.0004	43.6413	0		6.9176	148.4570253
1443	2.6232	279.4	131.281	2.4543	-0.2003	3582.076923	0.049085799	-0.020031801	20	0	1.9996	43.6412	0		6.9432	148.7711806
1444	2.6233	279.99	131.431	2.4572	-0.1992	3589.666667	0.049143749	-0.019916801	20	0	2.0004	43.6411	0		6.9664	149.085336
1445	2.6233	280.58	131.59	2.4604	-0.1979	3597.230769	0.049208599	-0.019793001	20	0	2.0004	43.641	0		6.992	149.3994913
1446	2.6234	281.21	131.75	2.4637	-0.1967	3605.25641	0.049273449	-0.019668401	20	0	2.0004	43.6409	0		7.0184	149.7349453
1447	2.6235	281.77	131.899	2.4667	-0.1968	3612.410256	0.049333949	-0.019681801	20	0	2	43.6407	0		7.0424	150.0331266
1448	2.6236	282.36	132.056	2.4699	-0.1951	3620	0.049397549	-0.019514001	20	0	2	43.6406	0		7.068	150.3472819
1449	2.6237	282.92	132.214	2.4729	-0.1939	3627.153846	0.049458649	-0.019393401	20	0	2	43.6405	0		7.092	150.6454632
1450	2.6238	283.48	132.359	2.4759	-0.1928	3634.333333	0.049517849	-0.019279201	20	0	2.0004	43.6404	0		7.116	150.9436446
1451	2.6239	284.07	132.514	2.479	-0.1916	3641.923077	0.049580199	-0.019158601	20	0	2	43.6404	0		7.1408	151.2577999
1452	2.624	284.68	132.667	2.4821	-0.1903	3649.717949	0.049641899	-0.019034801	20	0	1.9996	43.6403	0		7.1656	151.5826045
1453	2.624	285.2	132.811	2.4849	-0.1893	3656.461538	0.049697299	-0.018927601	20	0	2	43.6403	0		7.188	151.8594872
1454	2.6241	285.76	132.964	2.488	-0.1881	3663.615385	0.049759049	-0.018806201	20	0	2	43.6403	0		7.2128	152.1576685
1455	2.6242	286.32	133.106	2.4908	-0.187	3670.769231	0.049816999	-0.018697401	20	0	2	43.6403	0		7.2352	152.4558498
1456	2.6243	286.85	133.257	2.494	-0.1858	3677.512821	0.049879349	-0.018578401	20	0	1.9996	43.6403	0		7.2608	152.7380571
1457	2.6244	287.45	133.406	2.4969	-0.1846	3685.307692	0.049938549	-0.018461801	20	0	2.0004	43.6403	0		7.284	153.0575371
1458	2.6245	287.98	133.545	2.4997	-0.1836	3692.051282	0.049994599	-0.018358401	20	0	2	43.6403	0		7.3064	153.3397445
1459	2.6246	288.49	133.693	2.5028	-0.1825	3698.589744	0.050055049	-0.018247401	20	0	1.9996	43.6405	0		7.3312	153.6113024
1460	2.6246	289.07	133.839	2.5057	-0.181	3705.974359	0.050114849	-0.018102201	20	0	2	43.6406	0		7.3544	153.9201331
1461	2.6247	289.56	133.975	2.5085	-0.1801	3712.282051	0.050169649	-0.018013201	20	0	2.0008	43.6408	0		7.3768	154.1810418
1462	2.6248	290.12	134.12	2.5116	-0.179	3719.461538	0.050231399	-0.017900401	20	0	2.0008	43.6408	0		7.4016	154.4792231
1463	2.6249	290.63	134.254	2.5144	-0.1779	3725.974359	0.050287449	-0.017790201	20	0	2	43.6408	0		7.424	154.7507811
1464	2.625	291.14	134.396	2.5172	-0.1768	3732.512821	0.050343499	-0.017675801	20	0	2.0004	43.6408	0		7.4464	155.0223391
1465	2.6251	291.68	134.538	2.5201	-0.1757	3739.461538	0.050401449	-0.017570201	20	0	1.9996	43.6407	0		7.4696	155.309871
1466	2.6252	292.17	134.669	2.5227	-0.1746	3745.794872	0.050454349	-0.017461401	20	0	1.9996	43.6407	0		7.4904	155.5707797
1467	2.6253	292.65	134.808	2.5256	-0.1735	3751.897436	0.050511649	-0.017351201	20	0	2.0004	43.6405	0		7.5136	155.8263637
1468	2.6253	293.16	134.938	2.5283	-0.1724	3758.435897	0.050566449	-0.017238401	20	0	1.9996	43.6404	0		7.5352	156.0979217
1469	2.6254	293.65	135.075	2.5312	-0.1716	3764.74359	0.050623099	-0.017162801	20	0	2	43.6404	0		7.5584	156.3588303
1470	2.6255	294.13	135.211	2.5339	-0.1703	3770.871795	0.050677899	-0.017030201	20	0	2	43.6401	0		7.58	156.6144143
1471	2.6256	294.62	135.337	2.5366	-0.1693	3777.179487	0.050731449	-0.016927001	20	0	2	43.64	0		7.6016	156.875323
1472	2.6257	295.1	135.47	2.5394	-0.1681	3783.307692	0.050788149	-0.016805601	20	0	2.0004	43.6399	0		7.624	157.130907
1473	2.6258	295.62	135.602	2.5422	-0.1672	3790.051282	0.050843549	-0.016717401	20	0	2	43.6396	0		7.6464	157.4077896
1474	2.6259	296.07	135.725	2.5448	-0.166	3795.717949	0.050895199	-0.016601601	20	0	1.9996	43.6394	0		7.6672	157.6473996
1475	2.626	296.54	135.854	2.5476	-0.1651	3801.846154	0.050951249	-0.016514801	20	0	2.0008	43.6393	0		7.6896	157.8976589
1476	2.626	297	135.982	2.5502	-0.1641	3807.74359	0.051004799	-0.016406001	20	0	1.9996	43.6392	0		7.7104	158.1425936
1477	2.6261	297.46	136.101	2.5528	-0.1632	3813.641026	0.051055149	-0.016315401	20	0	2	43.6392	0		7.7312	158.3875283
1478	2.6262	297.92	136.228	2.5555	-0.1621	3819.538462	0.051110599	-0.016213601	20	0	2	43.6391	0		7.7528	158.6324629
1479	2.6263	298.32	136.345	2.5581	-0.1612	3824.589744	0.051162249	-0.016116001	20	0	2.0008	43.639	0		7.7736	158.8454496
1480	2.6264	298.8	136.469	2.5608	-0.1601	3830.717949	0.051215149	-0.016013401	20	0	2.0004	43.6388	0		7.7952	159.1010336
1481	2.6265	299.22	136.591	2.5633	-0.1592	3836.179487	0.051266149	-0.015918801	20	0	1.9996	43.6387	0		7.8152	159.3246695
1482	2.6266	299.63	136.705	2.5657	-0.1583	3841.461538	0.051313999	-0.015825801	20	0	2	43.6387	0		7.8344	159.5429809
1483	2.6266	300.08	136.825	2.5682	-0.1573	3847.153846	0.051363749	-0.015727401	20	0	2	43.6386	0		7.8544	159.7825909
1484	2.6267	300.49	136.936	2.5705	-0.1564	3852.410256	0.051409099	-0.015636801	20	0	2	43.6385	0		7.8728	160.0009022
1485	2.6268	300.9	137.053	2.573	-0.1553	3857.666667	0.051459499	-0.015532601	20	0	2	43.6385	0		7.8928	160.2192135
1486	2.6269	301.34	137.171	2.5755	-0.1545	3863.358974	0.051509249	-0.015446001	20	0	2	43.6385	0		7.9128	160.4534988
1487	2.627	301.72	137.278	2.5778	-0.1536	3868.205128	0.051555199	-0.015356201	20	0	1.9996	43.6385	0		7.9312	160.6558362
1488	2.6271	302.12	137.391	2.5802	-0.1527	3873.282051	0.051603699	-0.015268601	20	0	1.9996	43.6385	0		7.9504	160.8688228
1489	2.6272	302.53	137.504	2.5827	-0.1522	3878.538462	0.051654099	-0.015218201	20	0	2.0004	43.6385	0		7.9704	161.0871341
1490	2.6273	302.89	137.608	2.585	-0.151	3883.179487	0.051699449	-0.015095201	20	0	2	43.6385	0		7.9888	161.2788221
1491	2.6273	303.28	137.718	2.5873	-0.1501	3888.230769	0.051746699	-0.015006201	20	0	2	43.6385	0		8.0072	161.4864841
1492	2.6274	303.63	137.82	2.5896	-0.1492	3892.666667	0.051792049	-0.014917801	20	0	2.0004	43.6385	0		8.0256	161.6728475
1493	2.6275	304.02	137.927	2.5919	-0.1483	3897.717949	0.051838649	-0.014826401	20	0	2.0004	43.6384	0		8.044	161.8805094
1494	2.6276	304.42	138.033	2.5943	-0.1475	3902.769231	0.051885249	-0.014752401	20	0	1.9996	43.6382	0		8.0632	162.0934961
1495	2.6277	304.73	138.13	2.5964	-0.1467	3906.769231	0.051927449	-0.014665601	20	0	2.0004	43.6381	0		8.08	162.2585608
1496	2.6278	305.09	138.233	2.5987	-0.1457	3911.410256	0.051973399	-0.014571801	20	0	1.9996	43.638	0		8.0984	162.4502488
1497	2.6279	305.47	138.334	2.6009	-0.145	3916.25641	0.052017499	-0.014497001	20	0	2.0008	43.638	0		8.116	162.6525861
1498	2.6279	305.78	138.428	2.6029	-0.1443	3920.25641	0.052057799	-0.014432401	20	0	2	43.6378	0		8.132	162.8176507
1499	2.628	306.14	138.527	2.6051	-0.1433	3924.897436	0.052102499	-0.014333801	20	0	2.0004	43.6376	0		8.1496	163.0093387
1500	2.6281	306.45	138.618	2.607	-0.1426	3928.897436	0.052140299	-0.014259601	20	0	1.9996	43.6376	0		8.1648	163.1744034
1501	2.6282	306.78	138.714	2.6092	-0.1416	3933.102564	0.052183149	-0.014156401	20	0	2.0004	43.6376	0		8.1824	163.3501174
1502	2.6283	307.1	138.807	2.6111	-0.141	3937.128205	0.052222799	-0.014099601	20	0	2.0004	43.6375	0		8.1976	163.5205067
1503	2.6284	307.42	138.894	2.6131	-0.1403	3941.333333	0.052261849	-0.014026401	20	0	2	43.6374	0		8.2136	163.690896
1504	2.6285	307.7	138.985	2.6152	-0.1395	3944.923077	0.052303399	-0.013954601	20	0	2.0004	43.6374	0		8.2304	163.8399867
1505	2.6286	308.03	139.074	2.6171	-0.1388	3949.128205	0.052342449	-0.013877401	20	0	2.0004	43.6374	0		8.2456	164.0157007
1506	2.6286	308.31	139.157	2.6188	-0.1381	3952.717949	0.052375849	-0.013814401	20	0	1.9996	43.6373	0		8.2592	164.1647914
1507	2.6287	308.61	139.244	2.6206	-0.1374	3956.512821	0.052412999	-0.013737801	20	0	2	43.6372	0		8.2736	164.3245313
1508	2.6288	308.87	139.324	2.6224	-0.1365	3959.871795	0.052448299	-0.013646401	20	0	2	43.6371	0		8.288	164.4629727
1509	2.6289	309.17	139.407	2.6241	-0.136	3963.666667	0.052482299	-0.013595201	20	0	1.9992	43.6371	0		8.3016	164.6227127
1510	2.629	309.43	139.489	2.6261	-0.1352	3967.025641	0.052521349	-0.013521201	20	0	1.9988	43.6372	0		8.3176	164.761154
1511	2.6291	309.71	139.565	2.6277	-0.1346	3970.615385	0.052553449	-0.013464401	20	0	1.9996	43.6374	0		8.3304	164.9102447
1512	2.6292	309.94	139.644	2.6293	-0.134	3973.564103	0.052586199	-0.013399001	20	0	2	43.6377	0		8.3432	165.032712
1513	2.6292	310.18	139.722	2.6311	-0.1334	3976.717949	0.052622099	-0.013335001	20	0	1.9992	43.6379	0		8.3576	165.160504
1514	2.6293	310.43	139.793	2.6326	-0.1327	3979.897436	0.052652349	-0.013272001	20	0	1.9992	43.6381	0		8.3696	165.2936206
1515	2.6294	310.68	139.867	2.6343	-0.1321	3983.051282	0.052685099	-0.013209001	20	0	1.9992	43.6384	0		8.3832	165.4267373
1516	2.6295	310.89	139.935	2.6357	-0.1315	3985.794872	0.052714699	-0.013148201	20	0	2	43.6385	0		8.3944	165.5385553
1517	2.6296	311.12	140.007	2.6374	-0.1309	3988.74359	0.052748049	-0.013086801	20	0	2	43.6385	0		8.408	165.6610226
1518	2.6297	311.34	140.077	2.6389	-0.1303	3991.487179	0.052777049	-0.013029201	20	0	2	43.6387	0		8.42	165.7781653
1519	2.6298	311.55	140.141	2.6404	-0.1297	3994.230769	0.052807899	-0.012972601	20	0	2	43.6388	0		8.432	165.8899833
1520	2.6299	311.78	140.208	2.6419	-0.1292	3997.179487	0.052837499	-0.012918201	20	0	2.0004	43.6388	0		8.444	166.0124506
1521	2.6299	311.99	140.272	2.6434	-0.1286	3999.897436	0.052868999	-0.012858201	20	0	1.9996	43.6388	0		8.456	166.1242686
1522	2.63	312.17	140.332	2.6448	-0.128	4002.230769	0.052896699	-0.012804601	20	0	1.9996	43.6389	0		8.4672	166.2201126
1523	2.6301	312.37	140.394	2.6462	-0.1273	4004.74359	0.052924399	-0.012732201	20	0	2	43.6391	0		8.4784	166.3266059
1524	2.6302	312.54	140.45	2.6476	-0.1271	4006.871795	0.052951499	-0.012709201	20	0	2.0004	43.6391	0		8.4896	166.4171253
1525	2.6303	312.72	140.508	2.6489	-0.1266	4009.179487	0.052978549	-0.012659601	20	0	1.9996	43.6391	0		8.5	166.5129693
1526	2.6304	312.86	140.566	2.6503	-0.126	4011.076923	0.053005649	-0.012597401	20	0	2.0004	43.6392	0		8.5112	166.5875146
1527	2.6305	313.01	140.618	2.6514	-0.1255	4012.974359	0.053028949	-0.012554001	20	0	1.9996	43.6392	0		8.52	166.6673846
1528	2.6306	313.19	140.672	2.6527	-0.1251	4015.282051	0.053054149	-0.012505801	20	0	2	43.6392	0		8.5304	166.7632286
1529	2.6306	313.32	140.723	2.654	-0.1246	4016.974359	0.053079349	-0.012457001	20	0	2	43.6392	0		8.5408	166.8324492
1530	2.6307	313.49	140.771	2.6551	-0.1241	4019.076923	0.053101999	-0.012411201	20	0	2	43.6392	0		8.5496	166.9229686
1531	2.6308	313.62	140.82	2.6563	-0.1236	4020.769231	0.053125949	-0.012364001	20	0	1.9996	43.6392	0		8.5592	166.9921892
1532	2.6309	313.73	140.867	2.6574	-0.1232	4022.230769	0.053148599	-0.012317401	20	0	1.9996	43.6392	0		8.568	167.0507606
1533	2.631	313.85	140.91	2.6585	-0.1228	4023.717949	0.053169999	-0.012282001	20	0	2.0004	43.6393	0		8.5768	167.1146566
1534	2.6312	314.06	140.995	2.6606	-0.122	4026.461538	0.053211599	-0.012200001	20	0	2	43.6393	0		8.5936	167.2264746
1535	2.6312	314.18	141.036	2.6615	-0.1215	4027.923077	0.053230499	-0.012148001	20	0	2	43.6393	0		8.6008	167.2903706
1536	2.6314	314.36	141.113	2.6634	-0.121	4030.25641	0.053268249	-0.012096801	20	0	2.0012	43.6393	0		8.616	167.3862146
1537	2.6316	314.54	141.185	2.6652	-0.1202	4032.564103	0.053303549	-0.012022001	20	0	2	43.6391	0		8.6304	167.4820586
1538	2.6319	314.69	141.275	2.6675	-0.1192	4034.461538	0.053350149	-0.011923401	20	0	2.0004	43.6384	0		8.6488	167.5619285
1539	2.6321	314.82	141.352	2.6696	-0.1185	4036.153846	0.053392349	-0.011847001	20	0	2	43.6377	0		8.6656	167.6311492
1540	2.6331	314.7	141.521	2.6749	-0.1162	4034.666667	0.053497499	-0.011617601	20	0	2.0008	43.6351	0		8.708	167.5672532
1541	2.6333	314.56	141.535	2.6757	-0.116	4032.769231	0.053514499	-0.011597801	20	0	2.0008	43.6342	0		8.7144	167.4927079
1542	2.6335	314.41	141.538	2.6761	-0.1157	4030.871795	0.053522699	-0.011570201	20	0	2	43.6341	0		8.7176	167.4128379
1543	2.6337	314.23	141.533	2.6766	-0.1155	4028.564103	0.053531549	-0.011548201	20	0	2	43.6339	0		8.7216	167.3169939
1544	2.6338	314.01	141.524	2.6766	-0.1152	4025.820513	0.053532149	-0.011523001	20	0	2	43.634	0		8.7216	167.1998512
1545	2.6339	313.9	141.518	2.6768	-0.1152	4024.358974	0.053535299	-0.011519001	20	0	2	43.634	0		8.7232	167.1412799
1546	2.634	313.8	141.511	2.6768	-0.1151	4023.076923	0.053535949	-0.011505601	20	0	1.9996	43.634	0		8.7232	167.0880332
1547	2.6341	313.67	141.503	2.6769	-0.1151	4021.410256	0.053537849	-0.011506401	20	0	1.9996	43.6341	0		8.724	167.0188126
1548	2.6342	313.52	141.494	2.6768	-0.1151	4019.512821	0.053535299	-0.011507201	20	0	2	43.6341	0		8.7232	166.9389426
1549	2.6343	313.36	141.485	2.6769	-0.115	4017.384615	0.053538449	-0.011498601	20	0	2	43.6341	0		8.724	166.8537479
1550	2.6344	313.24	141.474	2.677	-0.1147	4015.923077	0.053540349	-0.011472601	20	0	2	43.6342	0		8.7248	166.7898519
1551	2.6345	313.08	141.463	2.677	-0.1149	4013.820513	0.053540349	-0.011489001	20	0	1.9996	43.6344	0		8.7248	166.7046573
1552	2.6345	312.9	141.449	2.677	-0.1149	4011.487179	0.053540349	-0.011485201	20	0	1.9996	43.6348	0		8.7248	166.6088133
1553	2.6346	312.73	141.438	2.677	-0.1148	4009.384615	0.053539699	-0.011475601	20	0	1.9996	43.6351	0		8.7248	166.5182939
1554	2.6347	312.58	141.424	2.677	-0.1148	4007.487179	0.053539099	-0.011483601	20	0	2	43.6353	0		8.7248	166.4384239
1555	2.6348	312.39	141.41	2.6769	-0.1147	4004.974359	0.053538449	-0.011474801	20	0	2	43.6356	0		8.724	166.3372553
1556	2.6349	312.21	141.397	2.6769	-0.1147	4002.641026	0.053537199	-0.011472601	20	0	1.9992	43.636	0		8.724	166.2414113
1557	2.635	312.01	141.383	2.6769	-0.1147	4000.128205	0.053537199	-0.011473401	20	0	1.9996	43.6363	0		8.724	166.1349179
1558	2.6351	311.81	141.368	2.6769	-0.1147	3997.589744	0.053537849	-0.011469401	20	0	1.9996	43.6367	0		8.724	166.0284246
1559	2.6352	311.61	141.352	2.6768	-0.1147	3995.051282	0.053535949	-0.011468601	20	0	1.9996	43.6371	0		8.7232	165.9219313
1560	2.6352	311.38	141.335	2.6768	-0.1147	3992.102564	0.053535299	-0.011465401	20	0	1.9992	43.6376	0		8.7232	165.799464
1561	2.6353	311.17	141.319	2.6767	-0.1147	3989.384615	0.053534049	-0.011465401	20	0	1.9992	43.6382	0		8.7224	165.687646
1562	2.6354	310.96	141.301	2.6766	-0.1147	3986.641026	0.053531549	-0.011465401	20	0	1.9996	43.6386	0		8.7216	165.575828
1563	2.6355	310.69	141.283	2.6765	-0.1147	3983.25641	0.053530899	-0.011472601	20	0	1.9996	43.639	0		8.7208	165.432062
1564	2.6356	310.48	141.265	2.6764	-0.1146	3980.512821	0.053528999	-0.011463801	20	0	1.9996	43.6394	0		8.72	165.320244
1565	2.6357	310.23	141.244	2.6764	-0.1146	3977.358974	0.053527099	-0.011461401	20	0	1.9992	43.6399	0		8.72	165.1871273
1566	2.6358	309.99	141.224	2.6762	-0.1147	3974.205128	0.053524599	-0.011468601	20	0	1.9992	43.6404	0		8.7184	165.0593353
1567	2.6358	309.69	141.202	2.676	-0.1146	3970.410256	0.053520799	-0.011464601	20	0	1.9992	43.6409	0		8.7168	164.8995953
1568	2.6359	309.43	141.181	2.676	-0.1146	3967.025641	0.053519549	-0.011464601	20	0	1.9996	43.6412	0		8.7168	164.761154
1569	2.636	309.2	141.159	2.6759	-0.1146	3964.076923	0.053517649	-0.011464601	20	0	1.9996	43.6418	0		8.716	164.6386867
1570	2.6361	308.94	141.135	2.6757	-0.1147	3960.717949	0.053513249	-0.011467801	20	0	2	43.6424	0		8.7144	164.5002453
1571	2.6362	308.64	141.108	2.6755	-0.1147	3956.923077	0.053510749	-0.011474001	20	0	1.9996	43.643	0		8.7128	164.3405053
1572	2.6363	308.33	141.084	2.6753	-0.1147	3952.923077	0.053506349	-0.011470201	20	0	1.9992	43.6435	0		8.7112	164.1754407
1573	2.6364	308.05	141.058	2.675	-0.1148	3949.333333	0.053500649	-0.011475601	20	0	1.9992	43.6441	0		8.7088	164.02635
1574	2.6365	307.77	141.03	2.6749	-0.1148	3945.74359	0.053497499	-0.011475601	20	0	1.9996	43.6445	0		8.708	163.8772594
1575	2.6365	307.44	140.999	2.6746	-0.1148	3941.538462	0.053491849	-0.011484401	20	0	1.9996	43.6449	0		8.7056	163.7015454
1576	2.6366	307.13	140.97	2.6743	-0.1148	3937.538462	0.053485549	-0.011482001	20	0	1.9992	43.6452	0		8.7032	163.5364807
1577	2.6367	306.83	140.941	2.6741	-0.1149	3933.74359	0.053481149	-0.011485201	20	0	1.9996	43.6457	0		8.7016	163.3767407
1578	2.6368	306.5	140.908	2.6736	-0.1149	3929.538462	0.053472949	-0.011493801	20	0	1.9996	43.6462	0		8.6976	163.2010267
1579	2.6369	306.14	140.873	2.6733	-0.1149	3924.897436	0.053466049	-0.011493001	20	0	1.9996	43.6466	0		8.6952	163.0093387
1580	2.637	305.85	140.84	2.673	-0.1148	3921.102564	0.053459749	-0.011482801	20	0	1.9996	43.647	0		8.6928	162.8549234
1581	2.6371	305.48	140.803	2.6726	-0.1151	3916.461538	0.053451549	-0.011507201	20	0	1.9996	43.6474	0		8.6896	162.6579107
1582	2.6371	305.16	140.765	2.6721	-0.1152	3912.25641	0.053442099	-0.011515001	20	0	1.9992	43.6477	0		8.6856	162.4875214
1583	2.6372	304.84	140.727	2.6717	-0.1152	3908.25641	0.053433299	-0.011521401	20	0	2	43.648	0		8.6824	162.3171321
1584	2.6373	304.47	140.684	2.6712	-0.1153	3903.410256	0.053423199	-0.011529201	20	0	1.9992	43.6482	0		8.6784	162.1201194
1585	2.6374	304.12	140.64	2.6705	-0.1154	3898.974359	0.053409999	-0.011541001	20	0	1.9996	43.6487	0		8.6728	161.9337561
1586	2.6375	303.79	140.592	2.6698	-0.1155	3894.769231	0.053396099	-0.011550601	20	0	1.9996	43.649	0		8.6672	161.7580421
1587	2.6376	303.43	140.539	2.669	-0.1156	3890.128205	0.053380399	-0.011564001	20	0	2	43.6493	0		8.6608	161.5663541
1588	2.6377	303.04	140.487	2.6682	-0.1158	3885.076923	0.053363999	-0.011575001	20	0	1.9996	43.6497	0		8.6544	161.3586921
1589	2.6378	302.67	140.429	2.6673	-0.1159	3880.435897	0.053345749	-0.011590001	20	0	1.9996	43.65	0		8.6472	161.1616795
1590	2.6378	302.28	140.373	2.6664	-0.1161	3875.384615	0.053328099	-0.011605801	20	0	2	43.6501	0		8.64	160.9540175
1591	2.6379	301.9	140.311	2.6656	-0.1162	3870.538462	0.053311749	-0.011621401	20	0	2	43.6503	0		8.6336	160.7516802
1592	2.638	301.47	140.247	2.6644	-0.1164	3865.051282	0.053288449	-0.011641201	20	0	1.9996	43.6505	0		8.624	160.5227195
1593	2.6381	301.08	140.186	2.6635	-0.1166	3860	0.053270149	-0.011657001	20	0	1.9992	43.6507	0		8.6168	160.3150575
1594	2.6382	300.67	140.12	2.6624	-0.117	3854.717949	0.053248099	-0.011700401	20	0	2	43.6511	0		8.608	160.0967462
1595	2.6383	300.24	140.053	2.6615	-0.117	3849.25641	0.053229199	-0.011699601	20	0	1.9996	43.6514	0		8.6008	159.8677855
1596	2.6384	299.83	139.989	2.6605	-0.1171	3843.974359	0.053209699	-0.011713001	20	0	1.9996	43.6514	0		8.5928	159.6494742
1597	2.6385	299.39	139.92	2.6594	-0.1173	3838.282051	0.053187649	-0.011732601	20	0	1.9996	43.6518	0		8.584	159.4151889
1598	2.6385	298.96	139.849	2.6582	-0.1175	3832.820513	0.053164349	-0.011754001	20	0	2.0004	43.6517	0		8.5744	159.1862282
1599	2.6386	298.53	139.782	2.6572	-0.1178	3827.333333	0.053144199	-0.011775201	20	0	2	43.6517	0		8.5664	158.9572676
1600	2.6387	298.09	139.709	2.656	-0.1179	3821.641026	0.053119649	-0.011791001	20	0	1.9996	43.6517	0		8.5568	158.7229822
1601	2.6388	297.64	139.639	2.655	-0.1182	3815.948718	0.053100099	-0.011818601	20	0	2	43.6518	0		8.5488	158.4833723
1602	2.6389	297.2	139.564	2.6538	-0.1184	3810.25641	0.053075549	-0.011839001	20	0	1.9996	43.6518	0		8.5392	158.2490869
1603	2.639	296.71	139.488	2.6525	-0.1184	3803.948718	0.053049749	-0.011841401	20	0	1.9996	43.6518	0		8.5288	157.9881783
1604	2.6391	296.28	139.415	2.6514	-0.1188	3798.461538	0.053027699	-0.011881601	20	0	1.9996	43.6518	0		8.52	157.7592176
1605	2.6391	295.77	139.337	2.6502	-0.1191	3791.948718	0.053003749	-0.011908401	20	0	2	43.6518	0		8.5104	157.4876596
1606	2.6392	295.31	139.263	2.6489	-0.1193	3786.025641	0.052977299	-0.011926601	20	0	2.0004	43.6518	0		8.5	157.242725
1607	2.6393	294.82	139.183	2.6477	-0.1195	3779.717949	0.052953349	-0.011954201	20	0	1.9992	43.6518	0		8.4904	156.9818163
1608	2.6394	294.34	139.103	2.6464	-0.1198	3773.615385	0.052928199	-0.011977001	20	0	2	43.652	0		8.48	156.7262323
1609	2.6395	293.88	139.026	2.6451	-0.12	3767.717949	0.052902349	-0.012001401	20	0	2	43.6521	0		8.4696	156.4812977
1610	2.6396	293.37	138.943	2.6439	-0.1203	3761.179487	0.052877149	-0.012027401	20	0	2	43.6522	0		8.46	156.2097397
1611	2.6397	292.85	138.859	2.6425	-0.1206	3754.435897	0.052849449	-0.012063601	20	0	2	43.6523	0		8.4488	155.932857
1612	2.6398	292.4	138.78	2.6412	-0.1208	3748.74359	0.052823649	-0.012081001	20	0	2	43.6525	0		8.4384	155.693247
1613	2.6398	291.86	138.695	2.6398	-0.1211	3741.794872	0.052795899	-0.012111001	20	0	2.0004	43.6525	0		8.4272	155.405715
1614	2.6399	291.37	138.614	2.6384	-0.1213	3735.461538	0.052768849	-0.012134601	20	0	1.9996	43.6525	0		8.416	155.1448064
1615	2.64	290.86	138.527	2.637	-0.1216	3728.923077	0.052739849	-0.012162201	20	0	2	43.6527	0		8.4048	154.8732484
1616	2.6401	290.3	138.439	2.6355	-0.1219	3721.769231	0.052709649	-0.012193801	20	0	2	43.6527	0		8.3928	154.5750671
1617	2.6402	289.81	138.355	2.6342	-0.1221	3715.461538	0.052684449	-0.012214201	20	0	2	43.6528	0		8.3824	154.3141584
1618	2.6403	289.28	138.264	2.6327	-0.1225	3708.717949	0.052653599	-0.012252001	20	0	2	43.6528	0		8.3704	154.0319511
1619	2.6404	288.72	138.172	2.6312	-0.1228	3701.538462	0.052623999	-0.012282801	20	0	2	43.6528	0		8.3584	153.7337698
1620	2.6404	288.21	138.086	2.6297	-0.1231	3695	0.052594999	-0.012312001	20	0	2.0004	43.6528	0		8.3464	153.4622118
1621	2.6405	287.64	137.994	2.6282	-0.1235	3687.641026	0.052563549	-0.012345001	20	0	2	43.6528	0		8.3344	153.1587058
1622	2.6406	287.11	137.906	2.627	-0.1237	3680.897436	0.052539599	-0.012374201	20	0	1.9992	43.6529	0		8.3248	152.8764985
1623	2.6407	286.57	137.812	2.6254	-0.1241	3673.948718	0.052508749	-0.012405001	20	0	1.9996	43.6531	0		8.312	152.5889665
1624	2.6408	285.98	137.716	2.6238	-0.1245	3666.358974	0.052476599	-0.012450801	20	0	2	43.6531	0		8.2992	152.2748112
1625	2.6409	285.45	137.626	2.6225	-0.1247	3659.615385	0.052449549	-0.012469601	20	0	1.9996	43.6531	0		8.2888	151.9926038
1626	2.641	284.87	137.528	2.6209	-0.1251	3652.230769	0.052418049	-0.012506601	20	0	2	43.6532	0		8.276	151.6837732
1627	2.6411	284.28	137.43	2.6193	-0.1254	3644.641026	0.052386549	-0.012535801	20	0	2	43.6536	0		8.2632	151.3696179
1628	2.6411	283.74	137.338	2.6179	-0.1257	3637.692308	0.052358849	-0.012572801	20	0	1.9992	43.6536	0		8.252	151.0820859
1629	2.6412	283.15	137.239	2.6163	-0.1261	3630.102564	0.052325449	-0.012605201	20	0	2	43.6537	0		8.2392	150.7679306
1630	2.6413	282.62	137.145	2.6148	-0.1264	3623.358974	0.052295849	-0.012636001	20	0	2.0004	43.6538	0		8.2272	150.4857232
1631	2.6414	282.01	137.043	2.6132	-0.1267	3615.564103	0.052263099	-0.012671401	20	0	1.9996	43.6538	0		8.2144	150.1609186
1632	2.6415	281.42	136.941	2.6115	-0.1272	3608	0.052229099	-0.012717201	20	0	1.9996	43.6539	0		8.2008	149.8467633
1633	2.6416	280.85	136.846	2.6099	-0.1274	3600.615385	0.052198249	-0.012740801	20	0	2.0004	43.6539	0		8.188	149.5432573
1634	2.6417	280.29	136.742	2.6082	-0.1279	3593.461538	0.052164249	-0.012789601	20	0	1.9996	43.6539	0		8.1744	149.245076
1635	2.6417	279.62	136.637	2.6064	-0.1282	3584.820513	0.052127099	-0.012824401	20	0	1.9996	43.6539	0		8.16	148.8883233
1636	2.6418	279.06	136.539	2.6046	-0.1286	3577.641026	0.052091799	-0.012859801	20	0	2	43.6539	0		8.1456	148.590142
1637	2.6419	278.45	136.434	2.6028	-0.129	3569.846154	0.052055899	-0.012896801	20	0	2	43.6539	0		8.1312	148.2653373
1638	2.642	277.87	136.334	2.6012	-0.1294	3562.487179	0.052024399	-0.012935401	20	0	2	43.6539	0		8.1184	147.9565067
1639	2.6421	277.25	136.227	2.5994	-0.1297	3554.461538	0.051988499	-0.012974801	20	0	1.9992	43.6539	0		8.104	147.6263774
1640	2.6422	276.62	136.119	2.5977	-0.1302	3546.461538	0.051953249	-0.013015001	20	0	1.9992	43.6539	0		8.0904	147.2909234
1641	2.6423	276.03	136.017	2.5961	-0.1305	3538.871795	0.051921149	-0.013051401	20	0	2.0004	43.6541	0		8.0776	146.976768
1642	2.6424	275.39	135.907	2.5943	-0.1313	3530.666667	0.051886499	-0.013125401	20	0	1.9996	43.6543	0		8.0632	146.6359894
1643	2.6424	274.77	135.797	2.5925	-0.1314	3522.641026	0.051849949	-0.013136401	20	0	2.0004	43.6543	0		8.0488	146.3058601
1644	2.6425	274.18	135.693	2.5908	-0.1318	3515.076923	0.051815349	-0.013176601	20	0	1.9996	43.6543	0		8.0352	145.9917048
1645	2.6426	273.52	135.581	2.5889	-0.1322	3506.641026	0.051777549	-0.013216001	20	0	2	43.6543	0		8.02	145.6402768
1646	2.6427	272.94	135.477	2.5872	-0.1326	3499.25641	0.051744149	-0.013261001	20	0	2	43.6543	0		8.0064	145.3314461
1647	2.6428	272.3	135.364	2.5854	-0.133	3491.051282	0.051707649	-0.013304401	20	0	1.9996	43.6543	0		7.992	144.9906675
1648	2.6429	271.64	135.25	2.5835	-0.1335	3482.615385	0.051669849	-0.013353201	20	0	1.9992	43.6545	0		7.9768	144.6392395
1649	2.643	271.04	135.143	2.5818	-0.134	3474.820513	0.051635849	-0.013395801	20	0	2	43.6547	0		7.9632	144.3197595
1650	2.6431	270.38	135.028	2.5798	-0.1344	3466.384615	0.051596799	-0.013441601	20	0	1.9996	43.6547	0		7.9472	143.9683315
1651	2.6431	269.72	134.912	2.578	-0.1349	3457.974359	0.051560249	-0.013489601	20	0	2	43.6546	0		7.9328	143.6169035
1652	2.6432	269.11	134.804	2.5763	-0.1354	3450.153846	0.051525599	-0.013536001	20	0	2.0004	43.6546	0		7.9192	143.2920989
1653	2.6433	268.46	134.688	2.5744	-0.1358	3441.74359	0.051487199	-0.013577801	20	0	2.0004	43.6546	0		7.904	142.9459955
1654	2.6434	267.8	134.57	2.5723	-0.1363	3433.307692	0.051446249	-0.013631401	20	0	2	43.6546	0		7.8872	142.5945676
1655	2.6435	267.14	134.461	2.5707	-0.1368	3424.871795	0.051413499	-0.013675601	20	0	1.9992	43.6546	0		7.8744	142.2431396
1656	2.6436	266.48	134.342	2.5687	-0.1372	3416.461538	0.051373849	-0.013723001	20	0	2.0004	43.6546	0		7.8584	141.8917116
1657	2.6437	265.86	134.231	2.5668	-0.1377	3408.435897	0.051336699	-0.013770201	20	0	2.0004	43.6546	0		7.8432	141.5615823
1658	2.6437	265.18	134.111	2.5649	-0.1382	3399.794872	0.051298249	-0.013822201	20	0	1.9996	43.6546	0		7.828	141.199505
1659	2.6438	264.51	133.991	2.563	-0.1387	3391.179487	0.051259199	-0.013871001	20	0	2.0004	43.6545	0		7.8128	140.8427523
1660	2.6439	263.87	133.878	2.5611	-0.1392	3382.948718	0.051222049	-0.013917601	20	0	2.0004	43.6545	0		7.7976	140.5019736
1661	2.644	263.18	133.758	2.5591	-0.1397	3374.102564	0.051182999	-0.013969601	20	0	2.0008	43.6544	0		7.7816	140.1345717
1662	2.6441	262.57	133.644	2.5573	-0.1402	3366.307692	0.051146499	-0.014017001	20	0	2	43.6541	0		7.7672	139.809767
1663	2.6442	261.88	133.522	2.5553	-0.1407	3357.461538	0.051106799	-0.014069801	20	0	1.9996	43.6541	0		7.7512	139.442365
1664	2.6443	261.21	133.399	2.5533	-0.1412	3348.820513	0.051066499	-0.014121801	20	0	2	43.6541	0		7.7352	139.0856124
1665	2.6444	260.57	133.284	2.5514	-0.1418	3340.589744	0.051028699	-0.014176201	20	0	2.0004	43.6541	0		7.72	138.7448337
1666	2.6444	259.88	133.16	2.5494	-0.1423	3331.74359	0.050987149	-0.014228201	20	0	2.0004	43.654	0		7.704	138.3774317
1667	2.6445	259.19	133.036	2.5474	-0.1428	3322.897436	0.050948099	-0.014280201	20	0	1.9996	43.6539	0		7.688	138.0100297
1668	2.6446	258.53	132.919	2.5454	-0.1434	3314.461538	0.050908399	-0.014337801	20	0	1.9996	43.6539	0		7.672	137.6586018
1669	2.6447	257.87	132.794	2.5434	-0.1439	3306.051282	0.050867499	-0.014389801	20	0	2.0004	43.6539	0		7.656	137.3071738
1670	2.6448	257.18	132.677	2.5414	-0.1444	3297.179487	0.050827799	-0.014441801	20	0	2	43.6538	0		7.64	136.9397718
1671	2.6449	256.51	132.552	2.5393	-0.145	3288.564103	0.050786249	-0.014500801	20	0	2	43.6538	0		7.6232	136.5830191
1672	2.645	255.82	132.425	2.5374	-0.1456	3279.692308	0.050748449	-0.014558401	20	0	2.0004	43.6538	0		7.608	136.2156172
1673	2.645	255.18	132.306	2.5355	-0.1461	3271.487179	0.050709399	-0.014610401	20	0	2	43.6538	0		7.5928	135.8748385
1674	2.6451	254.45	132.179	2.5334	-0.1466	3262.205128	0.050668449	-0.014664801	20	0	2	43.6538	0		7.576	135.4861378
1675	2.6452	253.78	132.052	2.5314	-0.1472	3253.564103	0.050627549	-0.014719201	20	0	2	43.6538	0		7.56	135.1293852
1676	2.6453	253.14	131.932	2.5294	-0.1478	3245.358974	0.050588499	-0.014776801	20	0	1.9996	43.6538	0		7.544	134.7886065
1677	2.6454	252.43	131.804	2.5273	-0.1484	3236.307692	0.050546299	-0.014838201	20	0	2	43.6537	0		7.5272	134.4105552
1678	2.6455	251.77	131.684	2.5254	-0.1489	3227.871795	0.050508499	-0.014893401	20	0	1.9996	43.6537	0		7.512	134.0591272
1679	2.6456	251.07	131.554	2.5233	-0.1495	3218.794872	0.050466299	-0.014954801	20	0	2	43.6537	0		7.4952	133.6864006
1680	2.6457	250.39	131.426	2.5213	-0.1501	3210.179487	0.050425349	-0.015013201	20	0	2	43.6538	0		7.4792	133.3243233
1681	2.6457	249.72	131.304	2.5192	-0.1507	3201.538462	0.050384449	-0.015068401	20	0	1.9992	43.6539	0		7.4624	132.9675706
1682	2.6458	249.03	131.174	2.5171	-0.1514	3192.692308	0.050342849	-0.015136201	20	0	2	43.6541	0		7.4456	132.6001686
1683	2.6459	248.32	131.044	2.515	-0.1519	3183.615385	0.050300649	-0.015190601	20	0	2.0004	43.6542	0		7.4288	132.2221173
1684	2.646	247.66	130.922	2.513	-0.1525	3175.179487	0.050260349	-0.015245801	20	0	1.9996	43.6544	0		7.4128	131.8706893
1685	2.6461	246.96	130.791	2.5109	-0.1531	3166.128205	0.050218149	-0.015305601	20	0	2.0004	43.6544	0		7.396	131.4979627
1686	2.6462	246.3	130.669	2.5089	-0.1536	3157.692308	0.050178499	-0.015362401	20	0	1.9996	43.6546	0		7.38	131.1465347
1687	2.6463	245.59	130.539	2.5068	-0.1542	3148.641026	0.050136299	-0.015423801	20	0	1.9996	43.6547	0		7.3632	130.7684834
1688	2.6463	244.9	130.41	2.5048	-0.1548	3139.794872	0.050095349	-0.015484601	20	0	1.9996	43.6547	0		7.3472	130.4010814
1689	2.6464	244.23	130.287	2.5028	-0.1555	3131.153846	0.050056299	-0.015545201	20	0	2.0004	43.6547	0		7.3312	130.0443287
1690	2.6465	243.54	130.156	2.5007	-0.1561	3122.307692	0.050013499	-0.015606801	20	0	1.9996	43.6547	0		7.3144	129.6769268
1691	2.6466	242.85	130.026	2.4986	-0.1567	3113.461538	0.049971299	-0.015666601	20	0	2	43.6547	0		7.2976	129.3095248
1692	2.6467	242.19	129.902	2.4966	-0.1572	3105.025641	0.049931599	-0.015722601	20	0	2	43.6547	0		7.2816	128.9580968
1693	2.6468	241.49	129.77	2.4944	-0.1579	3095.974359	0.049887499	-0.015792801	20	0	2	43.6549	0		7.264	128.5853701
1694	2.6469	240.81	129.645	2.4924	-0.1584	3087.333333	0.049847849	-0.015843201	20	0	1.9996	43.6553	0		7.248	128.2232928
1695	2.647	240.14	129.512	2.4902	-0.1591	3078.692308	0.049804999	-0.015913401	20	0	1.9996	43.6555	0		7.2304	127.8665402
1696	2.647	239.41	129.379	2.488	-0.1598	3069.410256	0.049760299	-0.015975601	20	0	1.9996	43.6558	0		7.2128	127.4778395
1697	2.6471	238.77	129.255	2.4861	-0.1603	3061.205128	0.049721249	-0.016031601	20	0	2	43.6561	0		7.1976	127.1370609
1698	2.6472	238.05	129.122	2.484	-0.161	3051.923077	0.049680949	-0.016097001	20	0	1.9996	43.6563	0		7.1808	126.7536849
1699	2.6473	237.38	128.989	2.4817	-0.1616	3043.282051	0.049634349	-0.016161601	20	0	1.9996	43.6563	0		7.1624	126.3969322
1700	2.6474	236.7	128.864	2.4798	-0.1622	3034.641026	0.049595299	-0.016220801	20	0	2.0004	43.6564	0		7.1472	126.0348549
1701	2.6475	236.01	128.732	2.4776	-0.1628	3025.794872	0.049551849	-0.016283801	20	0	1.9996	43.6564	0		7.1296	125.6674529
1702	2.6476	235.37	128.607	2.4756	-0.1635	3017.589744	0.049511549	-0.016347601	20	0	1.9996	43.6565	0		7.1136	125.3266743
1703	2.6477	234.68	128.474	2.4735	-0.1641	3008.717949	0.049469949	-0.016406801	20	0	2	43.6568	0		7.0968	124.9592723
1704	2.6477	233.96	128.341	2.4714	-0.1647	2999.461538	0.049427749	-0.016471401	20	0	2.0004	43.6572	0		7.08	124.5758963
1705	2.6478	233.33	128.217	2.4693	-0.1652	2991.461538	0.049385549	-0.016521201	20	0	2.0004	43.6572	0		7.0632	124.2404423
1706	2.6479	232.64	128.085	2.4672	-0.1659	2982.589744	0.049344649	-0.016593601	20	0	2	43.6573	0		7.0464	123.8730403
1707	2.648	231.95	127.951	2.4652	-0.1667	2973.74359	0.049303699	-0.016670001	20	0	2.0004	43.6573	0		7.0304	123.5056383
1708	2.6481	231.31	127.827	2.4632	-0.1673	2965.538462	0.049263399	-0.016728401	20	0	2	43.6572	0		7.0144	123.1648597
1709	2.6482	230.62	127.694	2.461	-0.1678	2956.692308	0.049219949	-0.016784401	20	0	2	43.6573	0		6.9968	122.7974577
1710	2.6483	229.98	127.569	2.459	-0.1685	2948.461538	0.049180249	-0.016848201	20	0	1.9996	43.6573	0		6.9808	122.456679
1711	2.6483	229.27	127.436	2.457	-0.1692	2939.410256	0.049139299	-0.016916001	20	0	2.0004	43.6573	0		6.9648	122.0786277
1712	2.6484	228.58	127.303	2.4548	-0.1698	2930.564103	0.049095249	-0.016978201	20	0	2	43.6573	0		6.9472	121.7112257
1713	2.6485	227.96	127.178	2.4528	-0.1703	2922.538462	0.049056799	-0.017031801	20	0	1.9996	43.6574	0		6.9312	121.3810964
1714	2.6486	227.3	127.046	2.4507	-0.171	2914.128205	0.049014599	-0.017102001	20	0	2	43.6575	0		6.9144	121.0296684
1715	2.6487	226.59	126.914	2.4487	-0.1716	2905.051282	0.048973049	-0.017164201	20	0	1.9996	43.6576	0		6.8984	120.6516171
1716	2.6488	225.95	126.79	2.4466	-0.1723	2896.846154	0.048932749	-0.017225801	20	0	1.9996	43.6578	0		6.8816	120.3108385
1717	2.6489	225.31	126.658	2.4446	-0.1729	2888.615385	0.048891199	-0.017289601	20	0	1.9996	43.6578	0		6.8656	119.9700598
1718	2.649	224.66	126.535	2.4426	-0.1736	2880.205128	0.048852149	-0.017355001	20	0	1.9996	43.6578	0		6.8496	119.6239565
1719	2.649	223.98	126.403	2.4405	-0.1741	2871.564103	0.048809949	-0.017411001	20	0	1.9996	43.6579	0		6.8328	119.2618792
1720	2.6491	223.32	126.273	2.4386	-0.1748	2863.128205	0.048771499	-0.017484401	20	0	2	43.6581	0		6.8176	118.9104512
1721	2.6492	222.68	126.151	2.4364	-0.1754	2854.923077	0.048728049	-0.017537201	20	0	2	43.6584	0		6.8	118.5696725
1722	2.6493	222.06	126.02	2.4344	-0.176	2846.897436	0.048687749	-0.017602601	20	0	1.9996	43.6585	0		6.784	118.2395432
1723	2.6494	221.38	125.89	2.4323	-0.1767	2838.25641	0.048646799	-0.017669601	20	0	1.9992	43.6585	0		6.7672	117.8774659
1724	2.6495	220.74	125.768	2.4304	-0.1773	2830.051282	0.048607749	-0.017731801	20	0	2	43.6586	0		6.752	117.5366872
1725	2.6496	220.09	125.638	2.4283	-0.1779	2821.615385	0.048566849	-0.017792601	20	0	1.9996	43.6587	0		6.7352	117.1905839
1726	2.6496	219.48	125.517	2.4265	-0.1785	2813.820513	0.048529649	-0.017850801	20	0	2.0004	43.6588	0		6.7208	116.8657793
1727	2.6497	218.82	125.388	2.4243	-0.1792	2805.384615	0.048486849	-0.017917001	20	0	1.9996	43.6588	0		6.7032	116.5143513
1728	2.6498	218.18	125.259	2.4223	-0.1798	2797.179487	0.048446549	-0.017980801	20	0	2	43.6589	0		6.6872	116.1735726
1729	2.6499	217.56	125.138	2.4204	-0.1804	2789.179487	0.048407499	-0.018040001	20	0	1.9996	43.659	0		6.672	115.8434433
1730	2.65	216.91	125.01	2.4184	-0.181	2780.948718	0.048368449	-0.018103001	20	0	2.0004	43.6591	0		6.656	115.49734
1731	2.6501	216.27	124.882	2.4164	-0.1817	2772.74359	0.048328149	-0.018165401	20	0	1.9996	43.6591	0		6.64	115.1565613
1732	2.6502	215.67	124.762	2.4143	-0.1823	2764.948718	0.048285949	-0.018228401	20	0	2	43.659	0		6.6232	114.8370814
1733	2.6503	215.06	124.636	2.4125	-0.1829	2757.153846	0.048249399	-0.018289001	20	0	2	43.659	0		6.6088	114.5122767
1734	2.6503	214.47	124.517	2.4106	-0.1835	2749.564103	0.048212899	-0.018349801	20	0	2.0004	43.6589	0		6.5936	114.1981214
1735	2.6504	213.84	124.391	2.4086	-0.1842	2741.538462	0.048172599	-0.018416001	20	0	2	43.6589	0		6.5776	113.8626674
1736	2.6505	213.2	124.264	2.4066	-0.1847	2733.333333	0.048132899	-0.018468001	20	0	2	43.6589	0		6.5616	113.5218887
1737	2.6506	212.64	124.147	2.4048	-0.1853	2726.179487	0.048095749	-0.018534201	20	0	2	43.6589	0		6.5472	113.2237074
1738	2.6507	212	124.021	2.4027	-0.186	2717.948718	0.048054199	-0.018595801	20	0	2.0008	43.6587	0		6.5304	112.8829288
1739	2.6508	211.38	123.896	2.4007	-0.1866	2709.948718	0.048013849	-0.018663601	20	0	2.0004	43.6587	0		6.5144	112.5527994
1740	2.6509	210.82	123.781	2.399	-0.1872	2702.769231	0.047979849	-0.018717001	20	0	2	43.6585	0		6.5008	112.2546181
1741	2.651	210.18	123.657	2.397	-0.1878	2694.564103	0.047939549	-0.018784001	20	0	1.9996	43.6584	0		6.4848	111.9138395
1742	2.651	209.63	123.542	2.3952	-0.1884	2687.615385	0.047904899	-0.018844001	20	0	2.0004	43.6584	0		6.4704	111.6209828
1743	2.6511	209.03	123.419	2.3933	-0.189	2679.820513	0.047865849	-0.018902401	20	0	2.0004	43.6584	0		6.4552	111.3015028
1744	2.6512	208.45	123.296	2.3914	-0.1896	2672.435897	0.047828099	-0.018963001	20	0	2.0008	43.6583	0		6.44	110.9926722
1745	2.6513	207.84	123.182	2.3896	-0.1902	2664.641026	0.047791549	-0.019023001	20	0	1.9996	43.6583	0		6.4256	110.6678675
1746	2.6514	207.28	123.06	2.3876	-0.1908	2657.487179	0.047752499	-0.019080401	20	0	2.0004	43.6583	0		6.4096	110.3696862
1747	2.6515	206.69	122.94	2.3856	-0.1914	2649.897436	0.047712849	-0.019144401	20	0	2.0004	43.6583	0		6.3936	110.0555309
1748	2.6516	206.13	122.828	2.384	-0.1921	2642.717949	0.047680699	-0.019208201	20	0	2.0008	43.6583	0		6.3808	109.7573496
1749	2.6516	205.54	122.709	2.3821	-0.1927	2635.153846	0.047642299	-0.019265001	20	0	1.9996	43.6583	0		6.3656	109.4431942
1750	2.6517	205	122.597	2.3805	-0.1932	2628.179487	0.047609549	-0.019320001	20	0	2	43.6583	0		6.3528	109.1556622
1751	2.6518	204.44	122.479	2.3784	-0.1938	2621.025641	0.047568599	-0.019377601	20	0	2	43.6584	0		6.336	108.8574809
1752	2.6519	203.88	122.362	2.3767	-0.1944	2613.871795	0.047533349	-0.019442201	20	0	2	43.6584	0		6.3224	108.5592996
1753	2.652	203.32	122.252	2.375	-0.195	2606.692308	0.047499949	-0.019496601	20	0	2.0004	43.6585	0		6.3088	108.2611183
1754	2.6521	202.76	122.135	2.3731	-0.1956	2599.538462	0.047462799	-0.019555001	20	0	2	43.6586	0		6.2936	107.962937
1755	2.6522	202.2	122.02	2.3713	-0.1961	2592.358974	0.047426899	-0.019612601	20	0	2	43.6587	0		6.2792	107.6647556
1756	2.6523	201.68	121.913	2.3697	-0.1967	2585.615385	0.047393499	-0.019674001	20	0	2	43.6587	0		6.2664	107.387873
1757	2.6523	201.14	121.798	2.3678	-0.1973	2578.666667	0.047356349	-0.019727601	20	0	1.9996	43.6587	0		6.2512	107.100341
1758	2.6524	200.63	121.691	2.3662	-0.1979	2572.128205	0.047324249	-0.019786801	20	0	2.0004	43.6587	0		6.2384	106.828783
1759	2.6525	200.08	121.579	2.3644	-0.1984	2565.179487	0.047288949	-0.019842601	20	0	2	43.6587	0		6.224	106.5359264
1760	2.6526	199.56	121.466	2.3627	-0.199	2558.435897	0.047254349	-0.019899401	20	0	2.0004	43.6587	0		6.2104	106.2590437
1761	2.6527	199.05	121.361	2.3611	-0.1996	2551.923077	0.047221599	-0.019955401	20	0	2	43.6587	0		6.1976	105.9874857
1762	2.6528	198.54	121.251	2.3593	-0.2002	2545.384615	0.047185699	-0.020016801	20	0	1.9996	43.6588	0		6.1832	105.7159277
1763	2.6529	198.01	121.141	2.3576	-0.2007	2538.641026	0.047151699	-0.020066601	20	0	1.9996	43.659	0		6.1696	105.4337204
1764	2.6529	197.5	121.039	2.356	-0.2011	2532.102564	0.047120799	-0.020108401	20	0	1.9996	43.6592	0		6.1568	105.1621624
1765	2.653	196.99	120.932	2.3543	-0.2018	2525.564103	0.047086799	-0.020181601	20	0	2	43.6594	0		6.1432	104.8906044
1766	2.6531	196.53	120.831	2.3529	-0.2023	2519.666667	0.047057199	-0.020225001	20	0	2.0004	43.6594	0		6.132	104.6456698
1767	2.6532	196.03	120.725	2.3512	-0.2027	2513.153846	0.047023199	-0.020273801	20	0	2	43.6596	0		6.1184	104.3794364
1768	2.6533	195.55	120.619	2.3496	-0.2033	2507.025641	0.046991099	-0.020333801	20	0	1.9996	43.6598	0		6.1056	104.1238525
1769	2.6534	195.06	120.521	2.348	-0.2039	2500.717949	0.046959599	-0.020385801	20	0	1.9996	43.6601	0		6.0928	103.8629438
1770	2.6535	194.58	120.417	2.3464	-0.2044	2494.589744	0.046927449	-0.020441001	20	0	1.9996	43.6604	0		6.08	103.6073598
1771	2.6536	194.09	120.314	2.3448	-0.2049	2488.282051	0.046896599	-0.020490601	20	0	2	43.6604	0		6.0672	103.3464511
1772	2.6536	193.64	120.217	2.3433	-0.2054	2482.589744	0.046866399	-0.020541801	20	0	1.9996	43.6604	0		6.0552	103.1068412
1773	2.6537	193.17	120.116	2.3417	-0.206	2476.487179	0.046834899	-0.020595401	20	0	2	43.6604	0		6.0424	102.8565818
1774	2.6538	192.72	120.022	2.3403	-0.2064	2470.794872	0.046805299	-0.020642801	20	0	2	43.6604	0		6.0312	102.6169718
1775	2.6539	192.26	119.923	2.3387	-0.2069	2464.897436	0.046774449	-0.020692401	20	0	2	43.6607	0		6.0184	102.3720372
1776	2.654	191.82	119.824	2.3373	-0.2074	2459.205128	0.046746099	-0.020742801	20	0	2	43.6607	0		6.0072	102.1377519
1777	2.6541	191.37	119.732	2.3359	-0.2079	2453.512821	0.046717099	-0.020792401	20	0	1.9992	43.6608	0		5.996	101.8981419
1778	2.6542	190.91	119.636	2.3344	-0.2084	2447.615385	0.046688149	-0.020842201	20	0	2	43.6608	0		5.984	101.6532072
1779	2.6542	190.5	119.54	2.3329	-0.2089	2442.333333	0.046657899	-0.020889401	20	0	2	43.6608	0		5.972	101.4348959
1780	2.6543	190.09	119.451	2.3315	-0.2093	2437.076923	0.046630849	-0.020933601	20	0	2	43.6608	0		5.9608	101.2165846
1781	2.6544	189.63	119.358	2.3302	-0.2099	2431.179487	0.046603099	-0.020986401	20	0	1.9996	43.661	0		5.9504	100.9716499
1782	2.6545	189.27	119.272	2.3287	-0.2103	2426.538462	0.046574149	-0.021034401	20	0	2	43.6609	0		5.9384	100.7799619
1783	2.6546	188.84	119.18	2.3274	-0.2108	2421.051282	0.046548949	-0.021079401	20	0	2.0004	43.6609	0		5.928	100.5510013
1784	2.6547	188.42	119.089	2.326	-0.2113	2415.589744	0.046519999	-0.021126001	20	0	1.9996	43.6609	0		5.9168	100.3273653
1785	2.6548	188.02	119.005	2.3247	-0.2117	2410.538462	0.046494149	-0.021172401	20	0	1.9996	43.661	0		5.9064	100.1143786
1786	2.6549	187.63	118.917	2.3234	-0.2121	2405.461538	0.046468349	-0.021214201	20	0	1.9996	43.6613	0		5.896	99.90671662
1787	2.6549	187.22	118.83	2.3221	-0.2126	2400.205128	0.046441899	-0.021261401	20	0	1.9992	43.6614	0		5.8856	99.6884053
1788	2.655	186.85	118.749	2.3208	-0.213	2395.564103	0.046416049	-0.021304001	20	0	2	43.6615	0		5.8752	99.49139264
1789	2.6551	186.48	118.665	2.3196	-0.2135	2390.717949	0.046392149	-0.021347401	20	0	1.9992	43.6619	0		5.8656	99.29437998
1790	2.6552	186.13	118.586	2.3185	-0.2139	2386.282051	0.046369449	-0.021386801	20	0	2	43.662	0		5.8568	99.10801665
1791	2.6553	185.74	118.503	2.3172	-0.2143	2381.230769	0.046344299	-0.021432601	20	0	2.0004	43.6621	0		5.8464	98.90035466
1792	2.6554	185.37	118.422	2.316	-0.2147	2376.589744	0.046319699	-0.021472801	20	0	2	43.6621	0		5.8368	98.703342
1793	2.6555	185.01	118.347	2.3149	-0.2151	2371.974359	0.046297049	-0.021513001	20	0	1.9996	43.6621	0		5.828	98.51165401
1794	2.6556	184.67	118.268	2.3136	-0.2156	2367.538462	0.046271849	-0.021557001	20	0	2	43.6622	0		5.8176	98.33061535
1795	2.6556	184.31	118.19	2.3125	-0.216	2362.897436	0.046249799	-0.021597201	20	0	2.0004	43.6624	0		5.8088	98.13892736
1796	2.6557	183.99	118.119	2.3114	-0.2164	2358.897436	0.046227749	-0.021635801	20	0	2.0004	43.6624	0		5.8	97.96853803
1797	2.6558	183.63	118.043	2.3101	-0.2167	2354.25641	0.046202549	-0.021672201	20	0	1.9996	43.6624	0		5.7896	97.77685004
1798	2.6559	183.32	117.973	2.3092	-0.2171	2350.25641	0.046183699	-0.021712401	20	0	2	43.6623	0		5.7824	97.61178538
1799	2.656	183.01	117.901	2.3081	-0.2174	2346.25641	0.046161649	-0.021736801	20	0	1.9996	43.6624	0		5.7736	97.44672072
1800	2.6561	182.71	117.829	2.307	-0.2178	2342.461538	0.046139599	-0.021775401	20	0	2.0004	43.6624	0		5.7648	97.28698073
1801	2.6562	182.38	117.763	2.306	-0.2182	2338.25641	0.046120699	-0.021817201	20	0	2	43.6623	0		5.7568	97.11126674
1802	2.6562	182.09	117.694	2.305	-0.2186	2334.461538	0.046100549	-0.021855801	20	0	2	43.6623	0		5.7488	96.95685141
1803	2.6563	181.78	117.626	2.3039	-0.2189	2330.461538	0.046077249	-0.021892001	20	0	1.9996	43.6622	0		5.74	96.79178675
1804	2.6564	181.5	117.563	2.303	-0.2192	2326.871795	0.046060249	-0.021920401	20	0	2.0004	43.6622	0		5.7328	96.64269609
1805	2.6565	181.2	117.497	2.3021	-0.2196	2323.076923	0.046041349	-0.021958201	20	0	2.0004	43.6621	0		5.7256	96.48295609
1806	2.6566	180.94	117.436	2.3012	-0.2199	2319.717949	0.046023699	-0.021992201	20	0	1.9996	43.6621	0		5.7184	96.34451477
1807	2.6567	180.67	117.374	2.3002	-0.2203	2316.333333	0.046004199	-0.022027601	20	0	2	43.6621	0		5.7104	96.20074877
1808	2.6568	180.36	117.313	2.2993	-0.2206	2312.333333	0.045985899	-0.022059201	20	0	1.9992	43.6621	0		5.7032	96.03568411
1809	2.6569	180.13	117.257	2.2985	-0.2209	2309.384615	0.045970799	-0.022089201	20	0	2.0004	43.6621	0		5.6968	95.91321678
1810	2.6569	179.87	117.197	2.2976	-0.2212	2306.025641	0.045951299	-0.022120601	20	0	1.9996	43.6623	0		5.6896	95.77477546
1811	2.657	179.62	117.14	2.2966	-0.2215	2302.846154	0.045932399	-0.022152201	20	0	2	43.6624	0		5.6816	95.64165879
1812	2.6571	179.39	117.088	2.296	-0.2218	2299.897436	0.045919149	-0.022180601	20	0	2	43.6625	0		5.6768	95.51919147
1813	2.6572	179.11	117.031	2.295	-0.2221	2296.333333	0.045900249	-0.022210601	20	0	2	43.6626	0		5.6688	95.37010081
1814	2.6573	178.95	116.982	2.2943	-0.2224	2294.205128	0.045886399	-0.022235001	20	0	2.0004	43.6625	0		5.6632	95.28490614
1815	2.6574	178.7	116.929	2.2935	-0.2227	2291.051282	0.045870649	-0.022271201	20	0	1.9996	43.6625	0		5.6568	95.15178948
1816	2.6575	178.49	116.878	2.2927	-0.2229	2288.307692	0.045854899	-0.022289401	20	0	2.0004	43.6625	0		5.6504	95.03997149
1817	2.6575	178.27	116.831	2.2921	-0.2231	2285.564103	0.045841699	-0.022310601	20	0	2	43.6625	0		5.6456	94.92282882
1818	2.6576	178.06	116.783	2.2913	-0.2235	2282.846154	0.045825299	-0.022345401	20	0	2	43.6624	0		5.6392	94.81101083
1819	2.6577	177.86	116.736	2.2906	-0.2237	2280.307692	0.045811449	-0.022370601	20	0	2	43.6623	0		5.6336	94.7045175
1820	2.6578	177.67	116.694	2.2899	-0.2239	2277.769231	0.045798849	-0.022390201	20	0	2	43.6622	0		5.628	94.60334884
1821	2.6579	177.5	116.65	2.2893	-0.2242	2275.666667	0.045785649	-0.022417001	20	0	2.0008	43.6621	0		5.6232	94.51282951
1822	2.658	177.34	116.611	2.2887	-0.2244	2273.564103	0.045773699	-0.022436801	20	0	1.9996	43.6618	0		5.6184	94.42763484
1823	2.6581	177.16	116.571	2.2881	-0.2246	2271.25641	0.045761099	-0.022458801	20	0	2	43.6617	0		5.6136	94.33179085
1824	2.6582	176.99	116.531	2.2875	-0.2248	2269.128205	0.045749749	-0.022481601	20	0	2	43.6616	0		5.6088	94.24127152
1825	2.6582	176.81	116.495	2.287	-0.225	2266.820513	0.045739049	-0.022495801	20	0	2.0004	43.6614	0		5.6048	94.14542752
1826	2.6583	176.66	116.459	2.2863	-0.2252	2264.923077	0.045726449	-0.022521801	20	0	2.0004	43.6614	0		5.5992	94.06555753
1827	2.6584	176.55	116.424	2.2858	-0.2254	2263.461538	0.045716349	-0.022540001	20	0	2	43.6614	0		5.5952	94.00698619
1828	2.6585	176.38	116.392	2.2853	-0.2256	2261.333333	0.045706299	-0.022559001	20	0	2	43.6614	0		5.5912	93.91646686
1829	2.6586	176.25	116.36	2.2848	-0.2257	2259.666667	0.045695599	-0.022574601	20	0	2	43.6613	0		5.5872	93.8472462
1830	2.6587	176.12	116.331	2.2842	-0.226	2257.974359	0.045684899	-0.022596801	20	0	2	43.6611	0		5.5824	93.77802554
1831	2.6589	175.91	116.274	2.2834	-0.2263	2255.230769	0.045668499	-0.022627401	20	0	2.0004	43.661	0		5.576	93.66620754
1832	2.659	175.69	116.224	2.2828	-0.2265	2252.487179	0.045655299	-0.022651201	20	0	1.9996	43.661	0		5.5712	93.54906488
1833	2.6592	175.55	116.18	2.2819	-0.2269	2250.589744	0.045638899	-0.022686601	20	0	2	43.6609	0		5.564	93.47451955
1834	2.6594	175.42	116.141	2.2813	-0.2271	2248.923077	0.045626949	-0.022706401	20	0	2	43.6608	0		5.5592	93.40529889
1835	2.6595	175.27	116.108	2.2807	-0.2273	2247.025641	0.045614349	-0.022725201	20	0	1.9996	43.6608	0		5.5544	93.32542889
1836	2.6598	175.14	116.069	2.2802	-0.2276	2245.333333	0.045603649	-0.022755201	20	0	2.0004	43.6608	0		5.5504	93.25620822
1837	2.6609	175.27	116.038	2.279	-0.2283	2247.025641	0.045580349	-0.022830001	20	0	1.9996	43.6636	0		5.5408	93.32542889
1838	2.6611	175.38	116.051	2.2789	-0.2283	2248.487179	0.045577799	-0.022831601	20	0	1.9984	43.6639	0		5.54	93.38400022
1839	2.6613	175.53	116.066	2.279	-0.2283	2250.384615	0.045580349	-0.022830001	20	0	2	43.6641	0		5.5408	93.46387022
1840	2.6615	175.73	116.085	2.2791	-0.2284	2252.923077	0.045582199	-0.022836401	20	0	2	43.6641	0		5.5416	93.57036355
1841	2.6615	175.84	116.095	2.2791	-0.2284	2254.384615	0.045581599	-0.022839601	20	0	1.9996	43.664	0		5.5416	93.62893488
1842	2.6617	176.04	116.117	2.2792	-0.2283	2256.923077	0.045584099	-0.022833201	20	0	2	43.6642	0		5.5424	93.73542821
1843	2.6618	176.15	116.129	2.2793	-0.2284	2258.384615	0.045585349	-0.022835601	20	0	1.9992	43.6642	0		5.5432	93.79399954
1844	2.6619	176.29	116.142	2.2792	-0.2285	2260.076923	0.045584099	-0.022851401	20	0	2.0004	43.6643	0		5.5424	93.86854487
1845	2.662	176.4	116.156	2.2795	-0.2284	2261.564103	0.045589149	-0.022841001	20	0	2.0004	43.6645	0		5.5448	93.9271162
1846	2.6621	176.57	116.172	2.2795	-0.2284	2263.666667	0.045590399	-0.022838801	20	0	2.0004	43.6645	0		5.5448	94.01763553
1847	2.6621	176.7	116.186	2.2796	-0.2284	2265.358974	0.045591049	-0.022842601	20	0	2	43.6645	0		5.5456	94.08685619
1848	2.6622	176.86	116.202	2.2797	-0.2284	2267.461538	0.045593549	-0.022844201	20	0	1.9996	43.6644	0		5.5464	94.17205085
1849	2.6623	177.01	116.219	2.2797	-0.2284	2269.358974	0.045594199	-0.022839601	20	0	2	43.6644	0		5.5464	94.25192085
1850	2.6624	177.16	116.235	2.2798	-0.2285	2271.25641	0.045596699	-0.022845001	20	0	2	43.6644	0		5.5472	94.33179085
1851	2.6625	177.35	116.253	2.2798	-0.2283	2273.769231	0.045596699	-0.022834801	20	0	2.0004	43.6643	0		5.5472	94.43295951
1852	2.6626	177.54	116.274	2.2801	-0.2284	2276.102564	0.045601099	-0.022839601	20	0	2	43.6643	0		5.5496	94.53412817
1853	2.6627	177.73	116.293	2.2801	-0.2284	2278.615385	0.045601099	-0.022837201	20	0	2	43.6643	0		5.5496	94.63529684
1854	2.6628	177.91	116.313	2.2803	-0.2284	2280.948718	0.045605499	-0.022835601	20	0	2	43.6642	0		5.5512	94.73114083
1855	2.6628	178.09	116.333	2.2804	-0.2284	2283.25641	0.045608049	-0.022836401	20	0	2	43.6642	0		5.552	94.82698483
1856	2.6629	178.29	116.355	2.2805	-0.2284	2285.794872	0.045609949	-0.022838801	20	0	1.9996	43.6643	0		5.5528	94.93347816
1857	2.663	178.5	116.379	2.2807	-0.2283	2288.512821	0.045614949	-0.022830801	20	0	1.9996	43.6643	0		5.5544	95.04529615
1858	2.6631	178.72	116.403	2.2808	-0.2283	2291.25641	0.045615599	-0.022829201	20	0	1.9992	43.6643	0		5.5552	95.16243881
1859	2.6632	178.93	116.428	2.281	-0.2282	2294	0.045619399	-0.022824601	20	0	1.9996	43.6644	0		5.5568	95.27425681
1860	2.6633	179.16	116.454	2.2813	-0.2282	2296.948718	0.045625699	-0.022817401	20	0	1.9992	43.6645	0		5.5592	95.39672414
1861	2.6634	179.38	116.481	2.2814	-0.2283	2299.692308	0.045628199	-0.022825401	20	0	2.0004	43.6647	0		5.56	95.5138668
1862	2.6635	179.67	116.51	2.2816	-0.2282	2303.487179	0.045632599	-0.022821401	20	0	2.0004	43.6646	0		5.5616	95.66828213
1863	2.6635	179.9	116.539	2.2818	-0.2282	2306.435897	0.045636399	-0.022819001	20	0	2	43.6646	0		5.5632	95.79074946
1864	2.6636	180.15	116.571	2.2821	-0.2281	2309.589744	0.045642699	-0.022812801	20	0	2.0004	43.6645	0		5.5656	95.92386612
1865	2.6637	180.43	116.604	2.2824	-0.2281	2313.179487	0.045648999	-0.022808801	20	0	2.0004	43.6644	0		5.568	96.07295678
1866	2.6638	180.66	116.636	2.2827	-0.2281	2316.128205	0.045654649	-0.022806401	20	0	1.9996	43.6643	0		5.5704	96.19542411
1867	2.6639	180.94	116.671	2.283	-0.228	2319.717949	0.045660949	-0.022802401	20	0	2.0004	43.6643	0		5.5728	96.34451477
1868	2.664	181.2	116.708	2.2834	-0.228	2323.076923	0.045667849	-0.022796201	20	0	1.9996	43.6643	0		5.576	96.48295609
1869	2.6641	181.5	116.745	2.2839	-0.2279	2326.871795	0.045677299	-0.022793801	20	0	2.0004	43.6643	0		5.58	96.64269609
1870	2.6641	181.76	116.785	2.2841	-0.2278	2330.25641	0.045682999	-0.022784401	20	0	2	43.6641	0		5.5816	96.78113742
1871	2.6642	182.06	116.825	2.2846	-0.2278	2334.051282	0.045691799	-0.022775601	20	0	2.0004	43.6639	0		5.5856	96.94087741
1872	2.6643	182.37	116.87	2.2852	-0.2277	2338.051282	0.045703149	-0.022770201	20	0	2.0004	43.6638	0		5.5904	97.10594207
1873	2.6644	182.65	116.916	2.2856	-0.2276	2341.615385	0.045711349	-0.022760601	20	0	2.0008	43.6636	0		5.5936	97.25503273
1874	2.6645	182.96	116.963	2.2862	-0.2275	2345.615385	0.045723299	-0.022752001	20	0	2	43.6634	0		5.5984	97.42009739
1875	2.6646	183.25	117.015	2.2867	-0.2274	2349.410256	0.045734649	-0.022741801	20	0	2	43.6632	0		5.6024	97.57451272
1876	2.6647	183.6	117.071	2.2875	-0.2273	2353.846154	0.045750399	-0.022732401	20	0	2.0004	43.663	0		5.6088	97.76087604
1877	2.6648	183.86	117.126	2.2881	-0.2272	2357.205128	0.045762949	-0.022718201	20	0	1.9996	43.6628	0		5.6136	97.89931737
1878	2.6648	184.21	117.188	2.289	-0.2271	2361.641026	0.045780599	-0.022706401	20	0	2	43.6628	0		5.6208	98.0856807
1879	2.6649	184.54	117.248	2.2898	-0.2269	2365.846154	0.045795699	-0.022689801	20	0	2	43.6626	0		5.6272	98.26139469
1880	2.665	184.93	117.313	2.2906	-0.2268	2370.923077	0.045812749	-0.022676401	20	0	2	43.6625	0		5.6336	98.46905668
1881	2.6651	185.28	117.379	2.2915	-0.2266	2375.333333	0.045830349	-0.022658201	20	0	2.0004	43.6623	0		5.6408	98.65542001
1882	2.6652	185.62	117.443	2.2923	-0.2264	2379.769231	0.045846749	-0.022643201	20	0	2	43.6622	0		5.6472	98.83645867
1883	2.6653	186	117.511	2.2932	-0.2262	2384.615385	0.045864349	-0.022624401	20	0	2	43.6621	0		5.6544	99.03879599
1884	2.6654	186.36	117.581	2.2942	-0.2261	2389.25641	0.045883249	-0.022607801	20	0	2	43.662	0		5.6624	99.23048398
1885	2.6654	186.76	117.647	2.2951	-0.2259	2394.307692	0.045901549	-0.022589601	20	0	2	43.662	0		5.6696	99.44347064
1886	2.6655	187.13	117.719	2.2961	-0.2257	2399.153846	0.045922299	-0.022573001	20	0	2	43.6618	0		5.6776	99.6404833
1887	2.6656	187.51	117.787	2.2971	-0.2256	2404	0.045941199	-0.022557401	20	0	2	43.6618	0		5.6856	99.84282062
1888	2.6657	187.91	117.861	2.2978	-0.2254	2409.051282	0.045956949	-0.022536801	20	0	2	43.6618	0		5.6912	100.0558073
1889	2.6658	188.3	117.937	2.299	-0.2252	2414.102564	0.045979599	-0.022517201	20	0	2.0008	43.6618	0		5.7008	100.2634693
1890	2.6659	188.68	118.009	2.3	-0.225	2418.948718	0.046000399	-0.022495801	20	0	2	43.6617	0		5.7088	100.4658066
1891	2.666	189.14	118.086	2.3011	-0.2248	2424.846154	0.046021799	-0.022477801	20	0	2.0004	43.6617	0		5.7176	100.7107413
1892	2.6661	189.57	118.164	2.3021	-0.2246	2430.333333	0.046041949	-0.022462801	20	0	2	43.6617	0		5.7256	100.9397019
1893	2.6661	189.98	118.238	2.3031	-0.2244	2435.589744	0.046062149	-0.022437601	20	0	2	43.6617	0		5.7336	101.1580132
1894	2.6662	190.4	118.319	2.3042	-0.2242	2441.076923	0.046084799	-0.022417801	20	0	1.9996	43.6617	0		5.7424	101.3816492
1895	2.6663	190.8	118.395	2.3054	-0.2239	2446.128205	0.046107449	-0.022394201	20	0	2.0004	43.6616	0		5.752	101.5946359
1896	2.6664	191.26	118.478	2.3066	-0.2237	2452.025641	0.046131399	-0.022372201	20	0	2.0004	43.6615	0		5.7616	101.8395705
1897	2.6665	191.72	118.561	2.3077	-0.2235	2457.923077	0.046154699	-0.022351601	20	0	2.0004	43.6613	0		5.7704	102.0845052
1898	2.6666	192.13	118.64	2.3089	-0.2233	2463.205128	0.046177399	-0.022329601	20	0	1.9996	43.6613	0		5.78	102.3028165
1899	2.6667	192.61	118.726	2.31	-0.223	2469.307692	0.046200049	-0.022301201	20	0	1.9992	43.6613	0		5.7888	102.5584005
1900	2.6667	193.03	118.806	2.311	-0.2228	2474.794872	0.046220849	-0.022283801	20	0	1.9996	43.6613	0		5.7968	102.7820365
1901	2.6668	193.51	118.894	2.3123	-0.2225	2480.897436	0.046245399	-0.022251601	20	0	2.0004	43.6613	0		5.8072	103.0376205
1902	2.6669	193.99	118.982	2.3135	-0.2223	2487.025641	0.046270599	-0.022227001	20	0	1.9996	43.6614	0		5.8168	103.2932045
1903	2.667	194.48	119.066	2.3147	-0.222	2493.333333	0.046293899	-0.022201001	20	0	1.9996	43.6615	0		5.8264	103.5541131
1904	2.6671	194.94	119.157	2.316	-0.2218	2499.230769	0.046319699	-0.022175801	20	0	1.9992	43.6615	0		5.8368	103.7990478
1905	2.6672	195.43	119.248	2.3172	-0.2216	2505.564103	0.046344299	-0.022155401	20	0	1.9996	43.6617	0		5.8464	104.0599565
1906	2.6673	195.91	119.335	2.3184	-0.2212	2511.666667	0.046367599	-0.022123801	20	0	1.9996	43.6617	0		5.856	104.3155404
1907	2.6674	196.42	119.429	2.3197	-0.221	2518.205128	0.046394049	-0.022096201	20	0	1.9996	43.6619	0		5.8664	104.5870984
1908	2.6674	196.9	119.523	2.321	-0.2207	2524.307692	0.046419199	-0.022069401	20	0	1.9996	43.6621	0		5.8768	104.8426824
1909	2.6675	197.41	119.611	2.3222	-0.2204	2530.846154	0.046444399	-0.022041001	20	0	1.9996	43.6622	0		5.8864	105.1142404
1910	2.6676	197.9	119.707	2.3235	-0.2201	2537.153846	0.046470849	-0.022014201	20	0	1.9992	43.6623	0		5.8968	105.3751491
1911	2.6677	198.44	119.805	2.3249	-0.2198	2544.128205	0.046498599	-0.021981201	20	0	2	43.6624	0		5.908	105.6626811
1912	2.6678	198.93	119.897	2.3263	-0.2195	2550.435897	0.046525649	-0.021952001	20	0	1.9996	43.6626	0		5.9192	105.9235897
1913	2.6679	199.44	119.997	2.3276	-0.2192	2556.974359	0.046552099	-0.021924401	20	0	2	43.6627	0		5.9296	106.1951477
1914	2.668	199.94	120.09	2.329	-0.219	2563.282051	0.046579199	-0.021896001	20	0	2	43.6628	0		5.9408	106.461381
1915	2.6681	200.5	120.191	2.3303	-0.2186	2570.461538	0.046606249	-0.021863601	20	0	2.0004	43.6628	0		5.9512	106.7595623
1916	2.6681	201.04	120.293	2.3319	-0.2183	2577.410256	0.046637749	-0.021830601	20	0	1.9992	43.6629	0		5.964	107.0470943
1917	2.6682	201.58	120.389	2.3332	-0.218	2584.358974	0.046664199	-0.021801401	20	0	2.0004	43.6629	0		5.9744	107.3346263
1918	2.6683	202.12	120.491	2.3347	-0.2177	2591.307692	0.046693799	-0.021767601	20	0	2	43.663	0		5.9864	107.6221583
1919	2.6684	202.65	120.589	2.3361	-0.2173	2598.051282	0.046722149	-0.021732001	20	0	2	43.6631	0		5.9976	107.9043656
1920	2.6685	203.19	120.694	2.3376	-0.217	2605	0.046752399	-0.021702201	20	0	1.9996	43.6631	0		6.0096	108.1918976
1921	2.6686	203.78	120.799	2.3391	-0.2167	2612.589744	0.046782599	-0.021667401	20	0	2.0008	43.6631	0		6.0216	108.5060529
1922	2.6687	204.31	120.899	2.3405	-0.2163	2619.333333	0.046810349	-0.021631201	20	0	2.0004	43.663	0		6.0328	108.7882603
1923	2.6687	204.9	121.006	2.3421	-0.216	2626.923077	0.046841799	-0.021597201	20	0	2.0004	43.6629	0		6.0456	109.1024156
1924	2.6688	205.44	121.114	2.3437	-0.2156	2633.871795	0.046874549	-0.021561001	20	0	2.0004	43.6629	0		6.0584	109.3899476
1925	2.6689	206	121.215	2.3451	-0.2153	2641.051282	0.046902899	-0.021526401	20	0	1.9996	43.6629	0		6.0696	109.6881289
1926	2.669	206.59	121.325	2.3468	-0.2149	2648.615385	0.046936299	-0.021491601	20	0	2.0004	43.6629	0		6.0832	110.0022842
1927	2.6691	207.15	121.428	2.3482	-0.2146	2655.794872	0.046963999	-0.021458601	20	0	1.9996	43.6628	0		6.0944	110.3004655
1928	2.6692	207.74	121.539	2.3499	-0.2142	2663.384615	0.046998649	-0.021421601	20	0	1.9996	43.6628	0		6.108	110.6146209
1929	2.6693	208.34	121.651	2.3516	-0.2138	2670.974359	0.047031399	-0.021379001	20	0	1.9996	43.6628	0		6.1216	110.9341008
1930	2.6694	208.88	121.756	2.353	-0.2134	2677.923077	0.047059749	-0.021343401	20	0	2	43.6626	0		6.1328	111.2216328
1931	2.6694	209.49	121.87	2.3548	-0.2129	2685.717949	0.047096249	-0.021288201	20	0	2	43.6625	0		6.1472	111.5464375
1932	2.6695	210.11	121.984	2.3564	-0.2126	2693.717949	0.047127099	-0.021261401	20	0	1.9996	43.6625	0		6.16	111.8765668
1933	2.6696	210.7	122.091	2.3579	-0.2122	2701.307692	0.047158599	-0.021219001	20	0	1.9996	43.6625	0		6.172	112.1907221
1934	2.6697	211.29	122.206	2.3598	-0.2118	2708.897436	0.047195749	-0.021177201	20	0	1.9992	43.6625	0		6.1872	112.5048774
1935	2.6698	211.89	122.315	2.3613	-0.2114	2716.487179	0.047226599	-0.021135401	20	0	2.0004	43.6624	0		6.1992	112.8243574
1936	2.6699	212.51	122.431	2.3631	-0.2109	2724.487179	0.047262499	-0.021092001	20	0	2	43.6624	0		6.2136	113.1544868
1937	2.67	213.13	122.549	2.3648	-0.2105	2732.487179	0.047295899	-0.021047001	20	0	2.0008	43.6624	0		6.2272	113.4846161
1938	2.67	213.73	122.659	2.3664	-0.2101	2740.076923	0.047328649	-0.021006201	20	0	2.0004	43.6623	0		6.24	113.8040961
1939	2.6701	214.35	122.778	2.3682	-0.2096	2748.076923	0.047363299	-0.020957201	20	0	1.9996	43.6621	0		6.2544	114.1342254
1940	2.6702	214.97	122.896	2.3699	-0.2091	2756.076923	0.047397949	-0.020910801	20	0	2	43.6621	0		6.268	114.4643547
1941	2.6703	215.57	123.009	2.3716	-0.2087	2763.666667	0.047431949	-0.020865801	20	0	2.0004	43.662	0		6.2816	114.7838347
1942	2.6704	216.22	123.129	2.3733	-0.2082	2772.102564	0.047466599	-0.020817001	20	0	2.0004	43.662	0		6.2952	115.129938
1943	2.6705	216.87	123.249	2.3753	-0.2077	2780.333333	0.047505599	-0.020771201	20	0	2	43.662	0		6.3112	115.4760413
1944	2.6706	217.46	123.362	2.3769	-0.2073	2787.897436	0.047537749	-0.020725401	20	0	2	43.662	0		6.324	115.7901966
1945	2.6707	218.1	123.484	2.3788	-0.2068	2796.128205	0.047575549	-0.020676601	20	0	1.9992	43.6619	0		6.3392	116.1309753
1946	2.6707	218.72	123.599	2.3805	-0.2063	2804.128205	0.047610799	-0.020632401	20	0	1.9996	43.6619	0		6.3528	116.4611046
1947	2.6708	219.36	123.722	2.3824	-0.2058	2812.358974	0.047647349	-0.020578801	20	0	2.0008	43.6619	0		6.368	116.8018833
1948	2.6709	219.99	123.838	2.3841	-0.2053	2820.358974	0.047681949	-0.020533201	20	0	2	43.6616	0		6.3816	117.1373373
1949	2.671	220.65	123.962	2.3859	-0.2048	2828.794872	0.047718499	-0.020482001	20	0	2	43.6614	0		6.396	117.4887652
1950	2.6711	221.29	124.086	2.3879	-0.2044	2837	0.047757549	-0.020437001	20	0	1.9996	43.6613	0		6.412	117.8295439
1951	2.6712	221.93	124.204	2.3897	-0.2038	2845.230769	0.047794699	-0.020380201	20	0	2.0004	43.6612	0		6.4264	118.1703225
1952	2.6713	222.58	124.33	2.3916	-0.2033	2853.641026	0.047832499	-0.020328201	20	0	2.0004	43.6608	0		6.4416	118.5164259
1953	2.6714	223.26	124.455	2.3935	-0.2028	2862.282051	0.047870899	-0.020280201	20	0	2.0004	43.6607	0		6.4568	118.8785032
1954	2.6714	223.88	124.573	2.3953	-0.2023	2870.282051	0.047906149	-0.020226601	20	0	2	43.6606	0		6.4712	119.2086325
1955	2.6715	224.56	124.699	2.3973	-0.2017	2878.923077	0.047945849	-0.020173801	20	0	1.9992	43.6605	0		6.4872	119.5707098
1956	2.6716	225.23	124.826	2.3992	-0.2012	2887.564103	0.047984249	-0.020117001	20	0	2.0012	43.6605	0		6.5024	119.9274625
1957	2.6717	225.87	124.945	2.401	-0.2007	2895.794872	0.048020149	-0.020065001	20	0	2	43.6603	0		6.5168	120.2682411
1958	2.6718	226.55	125.072	2.403	-0.2001	2904.435897	0.048059199	-0.020009801	20	0	2.0004	43.6601	0		6.5328	120.6303184
1959	2.6719	227.15	125.192	2.4048	-0.1996	2912.230769	0.048096999	-0.019964801	20	0	2	43.6598	0		6.5472	120.9497984
1960	2.672	227.86	125.321	2.4067	-0.199	2921.282051	0.048134799	-0.019904201	20	0	2	43.6595	0		6.5624	121.3278498
1961	2.672	228.52	125.45	2.4088	-0.1985	2929.717949	0.048176349	-0.019846601	20	0	2	43.6592	0		6.5792	121.6792777
1962	2.6721	229.18	125.571	2.4106	-0.198	2938.153846	0.048212899	-0.019801001	20	0	2.0004	43.6589	0		6.5936	122.0307057
1963	2.6722	229.87	125.701	2.4126	-0.1974	2947	0.048251949	-0.019741801	20	0	1.9996	43.6586	0		6.6096	122.3981077
1964	2.6723	230.57	125.831	2.4147	-0.1968	2956.051282	0.048293499	-0.019683401	20	0	2.0004	43.6582	0		6.6264	122.7708344
1965	2.6724	231.21	125.952	2.4166	-0.1963	2964.282051	0.048331299	-0.019625201	20	0	2.0004	43.6579	0		6.6416	123.111613
1966	2.6725	231.89	126.084	2.4185	-0.1957	2972.897436	0.048370949	-0.019574001	20	0	2	43.6574	0		6.6568	123.4736903
1967	2.6726	232.54	126.206	2.4204	-0.1951	2981.333333	0.048408099	-0.019514001	20	0	2.0004	43.6572	0		6.672	123.8197937
1968	2.6727	233.22	126.337	2.4225	-0.1946	2989.974359	0.048449699	-0.019458001	20	0	2.0004	43.6569	0		6.6888	124.181871
1969	2.6727	233.92	126.467	2.4245	-0.194	2999.025641	0.048490649	-0.019403601	20	0	2	43.6568	0		6.7048	124.5545976
1970	2.6728	234.58	126.59	2.4265	-0.1935	3007.461538	0.048529649	-0.019347601	20	0	2.0004	43.6566	0		6.7208	124.9060256
1971	2.6729	235.27	126.722	2.4286	-0.1929	3016.307692	0.048571249	-0.019287001	20	0	2	43.6564	0		6.7376	125.2734276
1972	2.673	235.98	126.853	2.4306	-0.1922	3025.384615	0.048612199	-0.019223201	20	0	2	43.6563	0		6.7536	125.6514789
1973	2.6731	236.64	126.977	2.4325	-0.1917	3033.794872	0.048649949	-0.019173401	20	0	1.9996	43.6563	0		6.7688	126.0029069
1974	2.6732	237.34	127.11	2.4346	-0.1911	3042.871795	0.048692149	-0.019105601	20	0	2.0008	43.6561	0		6.7856	126.3756336
1975	2.6733	237.97	127.234	2.4366	-0.1905	3050.871795	0.048731199	-0.019049001	20	0	2.0004	43.6561	0		6.8016	126.7110875
1976	2.6733	238.69	127.367	2.4387	-0.1899	3060.153846	0.048774049	-0.018993801	20	0	2.0004	43.6561	0		6.8184	127.0944635
1977	2.6734	239.38	127.5	2.4408	-0.1893	3069	0.048816249	-0.018933801	20	0	1.9996	43.6561	0		6.8352	127.4618655
1978	2.6735	240.02	127.624	2.4427	-0.1888	3077.205128	0.048853399	-0.018876401	20	0	2	43.656	0		6.8504	127.8026442
1979	2.6736	240.73	127.758	2.4448	-0.1881	3086.282051	0.048896849	-0.018812401	20	0	2	43.6559	0		6.8672	128.1806955
1980	2.6737	241.44	127.892	2.447	-0.1876	3095.333333	0.048940299	-0.018762001	20	0	2.0004	43.6559	0		6.8848	128.5587468
1981	2.6738	242.09	128.017	2.4489	-0.187	3103.769231	0.048978099	-0.018695801	20	0	2.0004	43.6559	0		6.9	128.9048501
1982	2.6739	242.82	128.15	2.451	-0.1864	3113.025641	0.049020899	-0.018638201	20	0	2	43.6559	0		6.9168	129.2935508
1983	2.674	243.46	128.276	2.453	-0.1859	3121.25641	0.049060599	-0.018585401	20	0	2.0004	43.6559	0		6.9328	129.6343294
1984	2.674	244.18	128.408	2.4551	-0.1852	3130.512821	0.049102799	-0.018515401	20	0	2.0008	43.6559	0		6.9496	130.0177054
1985	2.6741	244.87	128.54	2.4571	-0.1845	3139.358974	0.049141849	-0.018454601	20	0	1.9996	43.6558	0		6.9656	130.3851074
1986	2.6742	245.5	128.665	2.4591	-0.184	3147.384615	0.049182149	-0.018397801	20	0	2	43.6558	0		6.9816	130.7205614
1987	2.6743	246.2	128.799	2.4614	-0.1833	3156.435897	0.049227499	-0.018334001	20	0	2.0004	43.6558	0		7	131.093288
1988	2.6744	246.88	128.924	2.4634	-0.1828	3165.076923	0.049267149	-0.018278801	20	0	2	43.6557	0		7.016	131.4553653
1989	2.6745	247.58	129.057	2.4655	-0.1822	3174.128205	0.049310599	-0.018221401	20	0	2.0008	43.6555	0		7.0328	131.828092
1990	2.6746	248.27	129.191	2.4677	-0.1815	3182.974359	0.049353449	-0.018150401	20	0	2	43.6554	0		7.0504	132.195494
1991	2.6746	248.95	129.317	2.4696	-0.181	3191.615385	0.049392499	-0.018100001	20	0	2	43.6554	0		7.0656	132.5575713
1992	2.6747	249.64	129.45	2.4719	-0.1803	3200.487179	0.049437199	-0.018028201	20	0	2.0004	43.6553	0		7.084	132.9249733
1993	2.6748	250.36	129.584	2.474	-0.1796	3209.74359	0.049480649	-0.017962001	20	0	2.0008	43.6551	0		7.1008	133.3083493
1994	2.6749	251	129.709	2.476	-0.1791	3217.974359	0.049520349	-0.017909201	20	0	2.0008	43.655	0		7.1168	133.6491279
[truncated: 18,686 more rows]
