# Supplementary material for: An experimental study of deformation and fracture characteristics of shale with pore-water pressure and under triaxial cyclic loading
Source: R Soc Open Sci. 2018 Aug 22;5(8):180670. doi: 10.1098/rsos.180670 (PMC6124076; doi:10.1098/rsos.180670)
Supplement: The original data of the experiments under pore-water pressure of 14MPa [file rsos180670supp4.csv]

C:\Documents and Settings\Administrator\����\zhou15.csv
2017/8/16	14:24:41
���.10
diameter:50mm	Standard distance :100mm
���.	time	fload	displacement	deformation1	deformation2	stress	strain1	strain2	confining pressure	displacement2	water-pressure	discharge	temperature
	h	kN	mm	mm	mm	MPa
1	0.0001	40	64.172	1.5398	-0.3552	512.8205128	0.030795249	-0.035515402	20	0	0.0204	-112.1136	0
2	1.9586	40.21	69.161	1.5535	-0.3777	515.5641026	0.031069999	-0.037765402	20	0	10.0006	65.7275	0
3	1.9587	40.33	69.196	1.5536	-0.3776	517.025641	0.031071899	-0.037763802	20	0	9.9998	65.7274	0
4	1.9588	40.46	69.236	1.5538	-0.3776	518.7179487	0.031075049	-0.037763202	20	0	10.0006	65.7274	0
5	1.9589	40.69	69.312	1.5539	-0.3776	521.6666667	0.031078199	-0.037758402	20	0	10.0002	65.7273	0
6	1.959	40.82	69.352	1.5542	-0.3776	523.3589744	0.031083249	-0.037757602	20	0	10.0002	65.7272	0
7	1.9592	41.05	69.438	1.5545	-0.3775	526.3076923	0.031090199	-0.037751202	20	0	9.9998	65.727	0
8	1.9594	41.23	69.532	1.555	-0.3774	528.6153846	0.031100899	-0.037741002	20	0	9.9998	65.7269	0
9	1.9595	41.36	69.582	1.5553	-0.3774	530.3076923	0.031105299	-0.037737002	20	0	9.9993	65.7269	0
10	1.9595	41.5	69.634	1.5556	-0.3773	532	0.031112249	-0.037729202	20	0	9.9998	65.7269	0
11	1.9596	41.61	69.683	1.556	-0.3773	533.4615385	0.031119199	-0.037725202	20	0	9.9998	65.727	0
12	1.9597	41.74	69.734	1.5562	-0.3772	535.1538462	0.031124849	-0.037718202	20	0	9.9998	65.7269	0
13	1.9598	41.86	69.784	1.5566	-0.3771	536.6410256	0.031131799	-0.037713402	20	0	10.0002	65.7269	0
14	1.9599	41.99	69.831	1.5569	-0.3771	538.3076923	0.031138099	-0.037707202	20	0	9.9998	65.7268	0
15	1.96	42.14	69.88	1.5572	-0.377	540.2051282	0.031143749	-0.037702402	20	0	10.0006	65.7268	0
16	1.9601	42.27	69.926	1.5575	-0.377	541.8974359	0.031150049	-0.037697602	20	0	9.9998	65.7266	0
17	1.9602	42.38	69.975	1.5578	-0.3769	543.3846154	0.031156999	-0.037691402	20	0	10.0006	65.7265	0
18	1.9602	42.51	70.023	1.5581	-0.3769	545.0512821	0.031162049	-0.037686602	20	0	10.0002	65.7263	0
19	1.9603	42.63	70.068	1.5584	-0.3768	546.5384615	0.031167699	-0.037680402	20	0	10.0002	65.7262	0
20	1.9604	42.76	70.116	1.5587	-0.3768	548.2307692	0.031174649	-0.037675602	20	0	9.9998	65.7259	0
21	1.9605	42.89	70.163	1.559	-0.3767	549.8974359	0.031180299	-0.037670002	20	0	10.0002	65.7259	0
22	1.9606	43.01	70.207	1.5593	-0.3766	551.3846154	0.031185349	-0.037664602	20	0	10.0002	65.7257	0
23	1.9607	43.16	70.255	1.5596	-0.3766	553.2820513	0.031192899	-0.037659802	20	0	10.0002	65.7255	0
24	1.9608	43.29	70.302	1.5599	-0.3766	554.974359	0.031198599	-0.037655002	20	0	10.0006	65.7253	0
25	1.9609	43.4	70.346	1.5601	-0.3765	556.4358974	0.031201749	-0.037650402	20	0	10.0006	65.725	0
26	1.9609	43.55	70.392	1.5605	-0.3764	558.3333333	0.031209299	-0.037644002	20	0	10.0006	65.7248	0
27	1.9611	43.8	70.483	1.561	-0.3763	561.4871795	0.031219999	-0.037633802	20	0	10.0006	65.7245	0
28	1.9612	43.93	70.529	1.5613	-0.3763	563.1794872	0.031225699	-0.037629002	20	0	10.0014	65.7243	0
29	1.9614	44.16	70.62	1.562	-0.3762	566.1282051	0.031240149	-0.037618802	20	0	10.001	65.7238	0
30	1.9615	44.31	70.667	1.5622	-0.3761	568.025641	0.031243949	-0.037613402	20	0	9.9998	65.7236	0
31	1.9615	44.42	70.711	1.5625	-0.3761	569.5128205	0.031249649	-0.037606202	20	0	10.0006	65.7234	0
32	1.9617	44.65	70.8	1.563	-0.376	572.4615385	0.031260349	-0.037596002	20	0	10.001	65.7232	0
33	1.9618	44.8	70.847	1.5633	-0.3759	574.3589744	0.031265999	-0.037590402	20	0	10.0002	65.723	0
34	1.9619	44.91	70.893	1.5636	-0.3759	575.8205128	0.031272299	-0.037586402	20	0	10.0002	65.723	0
35	1.962	45.01	70.936	1.5638	-0.3758	577.1025641	0.031276099	-0.037581002	20	0	10.0006	65.7229	0
36	1.9621	45.15	70.983	1.5642	-0.3757	578.7948718	0.031283649	-0.037574602	20	0	10.0002	65.7229	0
37	1.9622	45.29	71.029	1.5644	-0.3757	580.6666667	0.031288699	-0.037569202	20	0	10.0002	65.7227	0
38	1.9622	45.42	71.072	1.5647	-0.3756	582.3589744	0.031293099	-0.037563602	20	0	10.0002	65.7223	0
39	1.9623	45.52	71.118	1.565	-0.3756	583.6410256	0.031300049	-0.037557402	20	0	9.9998	65.7222	0
40	1.9624	45.64	71.162	1.5653	-0.3755	585.1025641	0.031305099	-0.037552602	20	0	10.0002	65.7222	0
41	1.9625	45.79	71.208	1.5656	-0.3755	587	0.031311399	-0.037547002	20	0	10.0006	65.722	0
42	1.9626	45.92	71.254	1.5659	-0.3754	588.6923077	0.031317699	-0.037541602	20	0	9.9998	65.7217	0
43	1.9628	46.18	71.343	1.5663	-0.3753	592.0512821	0.031325899	-0.037529002	20	0	9.9998	65.7214	0
44	1.9628	46.31	71.388	1.5668	-0.3752	593.7435897	0.031335349	-0.037523402	20	0	10.0006	65.7213	0
45	1.963	46.54	71.477	1.5674	-0.3751	596.6923077	0.031347299	-0.037512402	20	0	10.0002	65.7212	0
46	1.9631	46.66	71.519	1.5676	-0.3751	598.1794872	0.031351699	-0.037507602	20	0	10.001	65.7211	0
47	1.9632	46.77	71.564	1.568	-0.375	599.6410256	0.031359299	-0.037500602	20	0	9.9998	65.721	0
48	1.9633	46.92	71.61	1.5683	-0.375	601.5384615	0.031366849	-0.037495802	20	0	10.0002	65.7207	0
49	1.9634	47.04	71.652	1.5686	-0.3749	603.025641	0.031371249	-0.037490402	20	0	10.0014	65.7207	0
50	1.9635	47.28	71.742	1.5693	-0.3748	606.1794872	0.031385099	-0.037477602	20	0	9.9998	65.7203	0
51	1.9636	47.43	71.787	1.5695	-0.3747	608.0769231	0.031389549	-0.037472202	20	0	10.001	65.7199	0
52	1.9638	47.64	71.875	1.5701	-0.3746	610.8205128	0.031402149	-0.037460402	20	0	10.0002	65.7195	0
53	1.9639	47.79	71.921	1.5704	-0.3746	612.7179487	0.031407199	-0.037455602	20	0	9.9993	65.7193	0
54	1.964	47.94	71.966	1.5707	-0.3745	614.6153846	0.031413499	-0.037448602	20	0	10.0002	65.7193	0
55	1.9641	48.19	72.054	1.5713	-0.3744	617.7692308	0.031425449	-0.037438202	20	0	10.0006	65.7192	0
56	1.9643	48.42	72.14	1.5719	-0.3743	620.7179487	0.031438049	-0.037425602	20	0	10.0002	65.7189	0
57	1.9644	48.55	72.185	1.5721	-0.3742	622.4102564	0.031441199	-0.037420202	20	0	10.0002	65.7189	0
58	1.9645	48.66	72.228	1.5724	-0.3741	623.8717949	0.031448149	-0.037414602	20	0	9.9998	65.719	0
59	1.9646	48.78	72.273	1.5728	-0.3741	625.3589744	0.031455049	-0.037409202	20	0	9.9998	65.719	0
60	1.9647	48.89	72.318	1.573	-0.374	626.8461538	0.031459499	-0.037402002	20	0	10.0006	65.7191	0
61	1.9648	49.06	72.361	1.5733	-0.374	628.9487179	0.031466399	-0.037395602	20	0	9.9998	65.7193	0
62	1.9649	49.29	72.447	1.5739	-0.3738	631.8974359	0.031477749	-0.037383802	20	0	9.9998	65.7193	0
63	1.965	49.44	72.491	1.5742	-0.3738	633.7948718	0.031484699	-0.037378402	20	0	10.0006	65.7192	0
64	1.9652	49.65	72.578	1.5748	-0.3737	636.5384615	0.031496049	-0.037366602	20	0	10.001	65.719	0
65	1.9653	49.81	72.623	1.5752	-0.3736	638.6410256	0.031504249	-0.037358602	20	0	10.0002	65.719	0
66	1.9655	50.01	72.709	1.5757	-0.3735	641.1538462	0.031513699	-0.037346802	20	0	10.0002	65.7192	0
67	1.9655	50.18	72.754	1.576	-0.3734	643.2820513	0.031520599	-0.037340602	20	0	10.0002	65.7192	0
68	1.9657	50.39	72.841	1.5767	-0.3733	646.025641	0.031533199	-0.037329402	20	0	10.0006	65.7192	0
69	1.9658	50.55	72.886	1.5769	-0.3732	648.1282051	0.031538249	-0.037320802	20	0	10.0002	65.7192	0
70	1.9659	50.67	72.927	1.5773	-0.3732	649.5897436	0.031545799	-0.037315202	20	0	10.0002	65.7192	0
71	1.966	50.8	72.972	1.5776	-0.3731	651.2820513	0.031552099	-0.037309802	20	0	10.0002	65.7192	0
72	1.9661	50.92	73.016	1.5778	-0.373	652.7692308	0.031556549	-0.037301802	20	0	10.0006	65.7192	0
73	1.9661	51.05	73.057	1.5781	-0.373	654.4358974	0.031562849	-0.037295602	20	0	10.0006	65.7191	0
74	1.9662	51.18	73.101	1.5784	-0.3729	656.1282051	0.031567899	-0.037290002	20	0	10.001	65.7188	0
75	1.9663	51.29	73.142	1.5788	-0.3728	657.6153846	0.031575449	-0.037282202	20	0	10.001	65.7185	0
76	1.9664	51.41	73.187	1.5791	-0.3728	659.0769231	0.031581749	-0.037275802	20	0	10.0002	65.7184	0
77	1.9665	51.56	73.231	1.5794	-0.3727	660.974359	0.031588049	-0.037271202	20	0	10.0002	65.7183	0
78	1.9667	51.77	73.317	1.58	-0.3726	663.7179487	0.031600649	-0.037255402	20	0	10.001	65.718	0
79	1.9668	51.93	73.361	1.5803	-0.3725	665.8205128	0.031606949	-0.037250602	20	0	10.0002	65.7179	0
80	1.9668	52.05	73.402	1.5806	-0.3724	667.3076923	0.031612599	-0.037242002	20	0	10.0006	65.7177	0
81	1.967	52.3	73.49	1.5814	-0.3723	670.4615385	0.031627099	-0.037229402	20	0	10.0002	65.7176	0
82	1.9671	52.44	73.53	1.5817	-0.3722	672.3589744	0.031634049	-0.037222202	20	0	10.0002	65.7176	0
83	1.9673	52.66	73.614	1.5823	-0.3721	675.1025641	0.031645999	-0.037208002	20	0	10.0002	65.7176	0
84	1.9674	52.81	73.657	1.5826	-0.372	677	0.031652949	-0.037202602	20	0	9.9998	65.7176	0
85	1.9675	53.05	73.741	1.5833	-0.3719	680.1538462	0.031665549	-0.037188402	20	0	10.0002	65.7176	0
86	1.9676	53.18	73.785	1.5836	-0.3718	681.8461538	0.031672499	-0.037180402	20	0	10.0002	65.7176	0
87	1.9677	53.3	73.828	1.5839	-0.3717	683.3076923	0.031678149	-0.037174202	20	0	10.0002	65.7176	0
88	1.9678	53.4	73.869	1.5844	-0.3717	684.5897436	0.031687599	-0.037167802	20	0	9.9998	65.7175	0
89	1.9679	53.53	73.913	1.5846	-0.3716	686.2564103	0.031691399	-0.037160002	20	0	10.0002	65.7175	0
90	1.968	53.66	73.953	1.5849	-0.3716	687.9487179	0.031698349	-0.037155202	20	0	10.0006	65.7174	0
91	1.9681	53.81	73.996	1.5853	-0.3715	689.8461538	0.031705899	-0.037145802	20	0	10.0006	65.7172	0
92	1.9681	53.94	74.039	1.5855	-0.3714	691.5384615	0.031710949	-0.037140202	20	0	10.0006	65.7172	0
93	1.9682	54.05	74.08	1.5859	-0.3713	693	0.031718499	-0.037131602	20	0	10.0002	65.7172	0
94	1.9683	54.17	74.122	1.5861	-0.3713	694.4871795	0.031721649	-0.037125202	20	0	10.0006	65.717	0
95	1.9684	54.29	74.163	1.5867	-0.3712	695.974359	0.031733599	-0.037119802	20	0	10.0002	65.717	0
96	1.9685	54.45	74.205	1.5868	-0.3711	698.0769231	0.031736149	-0.037110202	20	0	10.0006	65.7166	0
97	1.9686	54.56	74.248	1.587	-0.371	699.5384615	0.031740549	-0.037104002	20	0	9.9998	65.7161	0
98	1.9687	54.68	74.287	1.5876	-0.371	701.025641	0.031752549	-0.037096802	20	0	10.0006	65.7161	0
99	1.9688	54.79	74.33	1.5879	-0.3709	702.4871795	0.031757549	-0.037089802	20	0	10.0006	65.716	0
100	1.9688	54.93	74.374	1.5881	-0.3708	704.1794872	0.031762599	-0.037082002	20	0	10.0002	65.7158	0
101	1.9689	55.04	74.414	1.5885	-0.3707	705.6666667	0.031769549	-0.037074802	20	0	9.9998	65.7158	0
102	1.969	55.17	74.458	1.5888	-0.3707	707.3333333	0.031776449	-0.037066202	20	0	9.9998	65.7158	0
103	1.9691	55.29	74.498	1.5891	-0.3706	708.8205128	0.031782749	-0.037058202	20	0	9.9998	65.7158	0
104	1.9692	55.42	74.54	1.5895	-0.3705	710.5128205	0.031790349	-0.037052802	20	0	9.9998	65.7158	0
105	1.9693	55.57	74.582	1.5898	-0.3704	712.4102564	0.031796649	-0.037043202	20	0	9.9998	65.7159	0
106	1.9694	55.81	74.664	1.5905	-0.3703	715.5641026	0.031810499	-0.037029002	20	0	10.0002	65.7159	0
107	1.9695	55.93	74.706	1.5908	-0.3702	717.0512821	0.031815549	-0.037022002	20	0	10.0006	65.7158	0
108	1.9696	56.04	74.745	1.5912	-0.3701	718.5128205	0.031824349	-0.037014202	20	0	10.0002	65.7157	0
109	1.9698	56.31	74.83	1.5917	-0.37	721.8974359	0.031834449	-0.037000002	20	0	10.0006	65.7154	0
110	1.9699	56.44	74.87	1.592	-0.3699	723.5641026	0.031840749	-0.036992002	20	0	10.0002	65.7154	0
111	1.97	56.55	74.912	1.5924	-0.3698	725.0512821	0.031847049	-0.036984202	20	0	9.9998	65.7154	0
112	1.9701	56.77	74.994	1.593	-0.3697	727.7948718	0.031860899	-0.036967602	20	0	10.0002	65.7154	0
113	1.9702	56.93	75.038	1.5933	-0.3696	729.8974359	0.031866599	-0.036961202	20	0	10.0002	65.7152	0
114	1.9703	57.06	75.078	1.5937	-0.3695	731.5897436	0.031874149	-0.036954202	20	0	10.0006	65.715	0
115	1.9704	57.19	75.12	1.594	-0.3695	733.2564103	0.031880449	-0.036947002	20	0	10.0006	65.7148	0
116	1.9705	57.29	75.159	1.5944	-0.3694	734.5384615	0.031887399	-0.036937602	20	0	10.0006	65.7147	0
117	1.9706	57.42	75.201	1.5947	-0.3693	736.2051282	0.031893049	-0.036930602	20	0	10.0006	65.7144	0
118	1.9707	57.56	75.243	1.595	-0.3692	737.8974359	0.031899999	-0.036923402	20	0	9.9998	65.7142	0
119	1.9707	57.69	75.282	1.5953	-0.3692	739.5897436	0.031905649	-0.036915602	20	0	10.0002	65.7141	0
120	1.9708	57.8	75.325	1.5956	-0.3691	741.0769231	0.031911949	-0.036906002	20	0	10.0006	65.714	0
121	1.9709	57.93	75.367	1.5959	-0.369	742.7435897	0.031918899	-0.036899802	20	0	10.0006	65.7138	0
122	1.9711	58.18	75.448	1.5967	-0.3688	745.9230769	0.031933399	-0.036882402	20	0	10.0002	65.7138	0
123	1.9712	58.3	75.488	1.5969	-0.3688	747.3846154	0.031938449	-0.036876202	20	0	10.0002	65.7138	0
124	1.9713	58.41	75.53	1.5972	-0.3687	748.8717949	0.031944099	-0.036867402	20	0	10.001	65.7138	0
125	1.9714	58.56	75.572	1.5977	-0.3686	750.7692308	0.031954199	-0.036858002	20	0	10.0006	65.7138	0
126	1.9714	58.67	75.61	1.598	-0.3685	752.2307692	0.031959249	-0.036850202	20	0	9.9998	65.7138	0
127	1.9715	58.82	75.653	1.5982	-0.3684	754.1282051	0.031964249	-0.036843802	20	0	10.0002	65.7138	0
128	1.9716	58.94	75.694	1.5986	-0.3684	755.6153846	0.031972449	-0.036835202	20	0	10.0006	65.7138	0
129	1.9718	59.2	75.775	1.5993	-0.3682	758.974359	0.031985049	-0.036819402	20	0	9.9998	65.7138	0
130	1.9719	59.3	75.817	1.5996	-0.3681	760.2564103	0.031992649	-0.036809202	20	0	9.9998	65.7138	0
131	1.972	59.41	75.856	1.5998	-0.368	761.7179487	0.031996399	-0.036802002	20	0	10.0002	65.7138	0
132	1.972	59.56	75.898	1.6003	-0.3679	763.6153846	0.032005849	-0.036793402	20	0	9.9998	65.7138	0
133	1.9721	59.68	75.937	1.6005	-0.3679	765.1025641	0.032010299	-0.036786202	20	0	10.0002	65.7138	0
134	1.9722	59.79	75.979	1.6009	-0.3678	766.5641026	0.032017199	-0.036776802	20	0	10.0006	65.7138	0
135	1.9723	59.94	76.02	1.6014	-0.3677	768.4615385	0.032027899	-0.036768202	20	0	10.001	65.7138	0
136	1.9724	60.06	76.059	1.6015	-0.3676	769.9487179	0.032029199	-0.036761002	20	0	10.0002	65.7138	0
137	1.9725	60.2	76.1	1.6019	-0.3675	771.8461538	0.032037399	-0.036750802	20	0	10.0006	65.7137	0
138	1.9727	60.45	76.181	1.6025	-0.3673	775	0.032049999	-0.036733402	20	0	10.0006	65.7133	0
139	1.9727	60.56	76.222	1.6029	-0.3673	776.4615385	0.032058149	-0.036726402	20	0	10.0002	65.7131	0
140	1.9728	60.66	76.26	1.6032	-0.3672	777.7435897	0.032063849	-0.036717602	20	0	10.0002	65.7129	0
141	1.9729	60.79	76.301	1.6035	-0.3671	779.4102564	0.032069499	-0.036708202	20	0	10.0002	65.7127	0
142	1.973	60.94	76.343	1.6039	-0.367	781.3076923	0.032077099	-0.036698802	20	0	10.0002	65.7127	0
143	1.9731	61.06	76.381	1.6042	-0.3669	782.7948718	0.032083399	-0.036691602	20	0	9.9998	65.7126	0
144	1.9732	61.21	76.423	1.6043	-0.3668	784.6923077	0.032086549	-0.036682202	20	0	10.0006	65.7126	0
145	1.9733	61.32	76.465	1.6048	-0.3668	786.1794872	0.032096599	-0.036675002	20	0	10.001	65.7125	0
146	1.9734	61.57	76.545	1.6054	-0.3666	789.3333333	0.032107949	-0.036657802	20	0	10.0006	65.7125	0
147	1.9735	61.7	76.584	1.6058	-0.3665	791.025641	0.032116149	-0.036649802	20	0	10.0002	65.7125	0
148	1.9736	61.81	76.626	1.6062	-0.3664	792.4871795	0.032123699	-0.036639602	20	0	10.0002	65.7125	0
149	1.9737	61.95	76.667	1.6065	-0.3663	794.1794872	0.032129399	-0.036629402	20	0	10.0002	65.7125	0
150	1.9738	62.09	76.705	1.6068	-0.3662	796.0769231	0.032135699	-0.036622202	20	0	10.0006	65.7125	0
151	1.974	62.31	76.784	1.6076	-0.366	798.8205128	0.032152699	-0.036604202	20	0	10.0002	65.7124	0
152	1.974	62.44	76.825	1.6078	-0.366	800.4871795	0.032156499	-0.036595402	20	0	10.0002	65.7121	0
153	1.9741	62.57	76.866	1.6082	-0.3658	802.1794872	0.032164699	-0.036584402	20	0	9.9998	65.7118	0
154	1.9742	62.69	76.904	1.6087	-0.3658	803.6666667	0.032173499	-0.036577402	20	0	10.0002	65.7115	0
155	1.9743	62.8	76.946	1.6089	-0.3657	805.1282051	0.032177299	-0.036568602	20	0	10.0002	65.7115	0
156	1.9744	62.93	76.987	1.6092	-0.3656	806.8205128	0.032184849	-0.036558402	20	0	9.9993	65.7116	0
157	1.9745	63.05	77.025	1.6095	-0.3655	808.3076923	0.032189899	-0.036550602	20	0	9.9989	65.7119	0
158	1.9746	63.16	77.067	1.6099	-0.3654	809.7692308	0.032197449	-0.036541002	20	0	10.0002	65.7123	0
159	1.9747	63.29	77.106	1.6102	-0.3653	811.4615385	0.032204399	-0.036531602	20	0	9.9998	65.7128	0
160	1.9747	63.44	77.147	1.6106	-0.3652	813.3589744	0.032211949	-0.036523002	20	0	9.9998	65.7133	0
161	1.9748	63.56	77.187	1.6109	-0.3651	814.8205128	0.032218849	-0.036513402	20	0	10.0002	65.7135	0
162	1.9749	63.67	77.226	1.6113	-0.3651	816.3076923	0.032225149	-0.036505602	20	0	10.0002	65.7139	0
163	1.975	63.84	77.267	1.6116	-0.365	818.4102564	0.032232749	-0.036496202	20	0	9.9998	65.7142	0
164	1.9751	63.95	77.308	1.6119	-0.3649	819.8974359	0.032237799	-0.036487402	20	0	9.9998	65.7145	0
165	1.9753	64.18	77.387	1.6127	-0.3647	822.8461538	0.032254799	-0.036468602	20	0	10.0002	65.7151	0
166	1.9754	64.44	77.467	1.6133	-0.3645	826.2051282	0.032265499	-0.036448802	20	0	9.9998	65.7152	0
167	1.9755	64.56	77.508	1.6136	-0.3644	827.6923077	0.032272449	-0.036440202	20	0	10.0006	65.7153	0
168	1.9756	64.69	77.546	1.6139	-0.3643	829.3846154	0.032278749	-0.036431402	20	0	10.0002	65.7152	0
169	1.9757	64.82	77.587	1.6143	-0.3642	831.0512821	0.032286949	-0.036422802	20	0	10.0002	65.7151	0
170	1.9758	64.95	77.628	1.6146	-0.3641	832.7435897	0.032291349	-0.036413402	20	0	10.0002	65.7151	0
171	1.9759	65.07	77.666	1.615	-0.364	834.2307692	0.032299549	-0.036403002	20	0	10.0006	65.7151	0
172	1.976	65.18	77.706	1.6153	-0.3639	835.6923077	0.032306449	-0.036393602	20	0	10.0006	65.7149	0
173	1.976	65.35	77.748	1.6157	-0.3639	837.7948718	0.032313399	-0.036385002	20	0	10.0006	65.7148	0
174	1.9762	65.56	77.826	1.6163	-0.3637	840.5384615	0.032326649	-0.036366002	20	0	10.0006	65.7142	0
175	1.9763	65.71	77.864	1.6166	-0.3636	842.4358974	0.032331699	-0.036358202	20	0	10.0006	65.7138	0
176	1.9765	65.92	77.945	1.6173	-0.3634	845.1794872	0.032346149	-0.036337602	20	0	10.0014	65.7128	0
177	1.9766	66.07	77.983	1.6177	-0.3633	847.0769231	0.032354999	-0.036328202	20	0	10.0006	65.7124	0
178	1.9766	66.2	78.023	1.6181	-0.3632	848.7692308	0.032361949	-0.036319402	20	0	10.0002	65.7122	0
179	1.9768	66.43	78.102	1.6187	-0.363	851.7179487	0.032373249	-0.036299802	20	0	10.001	65.7114	0
180	1.9769	66.55	78.142	1.6191	-0.3629	853.1794872	0.032382099	-0.036291202	20	0	9.9998	65.7112	0
181	1.977	66.66	78.18	1.6194	-0.3628	854.6666667	0.032388399	-0.036281602	20	0	10.0002	65.7112	0
182	1.9771	66.81	78.22	1.6197	-0.3627	856.5641026	0.032394049	-0.036271402	20	0	10.0006	65.7112	0
183	1.9772	66.96	78.261	1.6202	-0.3626	858.4615385	0.032403499	-0.036262802	20	0	10.0002	65.7112	0
184	1.9773	67.07	78.299	1.6204	-0.3625	859.9230769	0.032408549	-0.036253202	20	0	10.0002	65.711	0
185	1.9773	67.19	78.339	1.6208	-0.3624	861.4102564	0.032416099	-0.036244602	20	0	10.0002	65.711	0
186	1.9774	67.3	78.38	1.6212	-0.3623	862.8717949	0.032424299	-0.036233602	20	0	10.0006	65.711	0
187	1.9775	67.45	78.417	1.6215	-0.3622	864.7692308	0.032429349	-0.036223402	20	0	10.0006	65.711	0
188	1.9776	67.58	78.458	1.6218	-0.3621	866.4615385	0.032436299	-0.036213802	20	0	10.0006	65.7111	0
189	1.9778	67.83	78.536	1.6226	-0.362	869.6153846	0.032451399	-0.036195802	20	0	10.0002	65.7115	0
190	1.9779	67.95	78.576	1.6229	-0.3618	871.1025641	0.032457099	-0.036183802	20	0	10.0006	65.7115	0
191	1.978	68.06	78.614	1.6232	-0.3617	872.5897436	0.032463399	-0.036173602	20	0	10.0002	65.7115	0
192	1.978	68.18	78.654	1.6236	-0.3616	874.0512821	0.032471599	-0.036164202	20	0	9.9998	65.7115	0
193	1.9781	68.32	78.695	1.624	-0.3615	875.9487179	0.032479149	-0.036154002	20	0	9.9998	65.7115	0
194	1.9782	68.44	78.733	1.6243	-0.3614	877.4358974	0.032486099	-0.036143602	20	0	9.9998	65.7115	0
195	1.9783	68.59	78.773	1.6247	-0.3613	879.3333333	0.032493649	-0.036134202	20	0	10.0006	65.7114	0
196	1.9784	68.7	78.811	1.625	-0.3612	880.7948718	0.032499949	-0.036124802	20	0	9.9998	65.7114	0
197	1.9786	68.93	78.891	1.6257	-0.361	883.7435897	0.032513149	-0.036104202	20	0	10.0002	65.7111	0
198	1.9786	69.08	78.929	1.626	-0.3609	885.6410256	0.032519499	-0.036094802	20	0	9.9998	65.7109	0
199	1.9787	69.21	78.969	1.6262	-0.3608	887.3333333	0.032523899	-0.036084602	20	0	10.0002	65.7105	0
200	1.9788	69.33	79.006	1.6267	-0.3608	888.7948718	0.032533949	-0.036075002	20	0	10.0006	65.7103	0
201	1.979	69.57	79.086	1.6273	-0.3606	891.974359	0.032545949	-0.036055402	20	0	9.9998	65.7101	0
202	1.9791	69.69	79.123	1.6278	-0.3605	893.4358974	0.032555399	-0.036045202	20	0	9.9998	65.7102	0
203	1.9792	69.82	79.163	1.6281	-0.3603	895.1282051	0.032562349	-0.036033202	20	0	9.9998	65.7104	0
204	1.9793	69.95	79.203	1.6284	-0.3603	896.8205128	0.032567999	-0.036025402	20	0	9.9998	65.7107	0
205	1.9794	70.2	79.281	1.6291	-0.36	899.974359	0.032582499	-0.036002602	20	0	9.9998	65.7116	0
206	1.9796	70.44	79.359	1.6298	-0.3598	903.1282051	0.032596349	-0.035983602	20	0	10.0002	65.7122	0
207	1.9797	70.56	79.399	1.6301	-0.3597	904.6153846	0.032602649	-0.035973402	20	0	9.9993	65.7123	0
208	1.9798	70.69	79.437	1.6305	-0.3596	906.3076923	0.032610849	-0.035963202	20	0	10.0002	65.7126	0
209	1.9799	70.82	79.477	1.6309	-0.3595	907.974359	0.032617149	-0.035952002	20	0	9.9998	65.713	0
210	1.9799	70.95	79.517	1.6312	-0.3594	909.6666667	0.032623449	-0.035941002	20	0	10.0006	65.7132	0
211	1.98	71.07	79.555	1.6316	-0.3593	911.1538462	0.032632299	-0.035931602	20	0	10.0002	65.7131	0
212	1.9801	71.18	79.595	1.6319	-0.3592	912.6153846	0.032637299	-0.035922202	20	0	9.9998	65.7131	0
213	1.9802	71.32	79.634	1.6323	-0.3591	914.3076923	0.032646149	-0.035911002	20	0	9.9998	65.7132	0
214	1.9803	71.45	79.671	1.6327	-0.359	916	0.032654349	-0.035903202	20	0	9.9998	65.7133	0
215	1.9804	71.56	79.711	1.633	-0.3589	917.4615385	0.032659399	-0.035890602	20	0	10.0002	65.7134	0
216	1.9805	71.69	79.748	1.6333	-0.3588	919.1538462	0.032665049	-0.035882002	20	0	10.001	65.7133	0
217	1.9806	71.81	79.788	1.6337	-0.3587	920.6410256	0.032674499	-0.035870802	20	0	10.0006	65.7131	0
218	1.9806	71.92	79.827	1.6339	-0.3586	922.1025641	0.032677649	-0.035860602	20	0	10.0002	65.7127	0
219	1.9807	72.09	79.865	1.6344	-0.3585	924.2051282	0.032687099	-0.035850402	20	0	10.0006	65.7124	0
220	1.9808	72.22	79.904	1.6347	-0.3584	925.8974359	0.032693399	-0.035839402	20	0	10.001	65.7118	0
221	1.981	72.45	79.98	1.6354	-0.3582	928.8461538	0.032708549	-0.035819602	20	0	10.0002	65.7109	0
222	1.9811	72.58	80.02	1.6358	-0.3581	930.5384615	0.032715449	-0.035807802	20	0	10.0002	65.7106	0
223	1.9812	72.83	80.096	1.6364	-0.3579	933.6923077	0.032728699	-0.035787402	20	0	10.001	65.7098	0
224	1.9813	72.94	80.136	1.6368	-0.3578	935.1794872	0.032736899	-0.035776202	20	0	10.0006	65.7093	0
225	1.9814	73.06	80.173	1.6372	-0.3577	936.6410256	0.032744449	-0.035766802	20	0	9.9998	65.7091	0
226	1.9815	73.21	80.213	1.6375	-0.3576	938.5384615	0.032749499	-0.035755802	20	0	9.9989	65.7092	0
227	1.9816	73.32	80.252	1.6379	-0.3574	940.025641	0.032757699	-0.035744002	20	0	10.0002	65.7095	0
228	1.9818	73.57	80.328	1.6385	-0.3572	943.1794872	0.032770299	-0.035723402	20	0	9.9998	65.71	0
229	1.9819	73.68	80.365	1.6389	-0.3571	944.6666667	0.032778499	-0.035711602	20	0	9.9993	65.7104	0
230	1.9819	73.83	80.404	1.6393	-0.357	946.5641026	0.032786049	-0.035702202	20	0	9.9998	65.7108	0
231	1.982	73.95	80.444	1.6396	-0.3569	948.025641	0.032792349	-0.035691202	20	0	9.9993	65.7111	0
232	1.9821	74.06	80.481	1.64	-0.3568	949.5128205	0.032799299	-0.035680802	20	0	9.9993	65.7115	0
233	1.9822	74.21	80.52	1.6403	-0.3567	951.4102564	0.032806199	-0.035669802	20	0	9.9998	65.712	0
234	1.9823	74.34	80.56	1.6407	-0.3566	953.0769231	0.032813799	-0.035658802	20	0	10.0002	65.712	0
235	1.9825	74.55	80.636	1.6415	-0.3564	955.8205128	0.032830799	-0.035637602	20	0	10.0002	65.7122	0
236	1.9826	74.69	80.672	1.6417	-0.3563	957.5128205	0.032834599	-0.035627202	20	0	10.0002	65.7122	0
237	1.9826	74.83	80.712	1.6421	-0.3562	959.4102564	0.032842749	-0.035617002	20	0	10.0002	65.7123	0
238	1.9827	74.97	80.751	1.6425	-0.3561	961.1025641	0.032849699	-0.035605202	20	0	10.0006	65.7126	0
239	1.9829	75.2	80.827	1.6432	-0.3558	964.0512821	0.032864199	-0.035583202	20	0	10.0002	65.7124	0
240	1.9831	75.44	80.902	1.6439	-0.3556	967.2051282	0.032877449	-0.035562602	20	0	10.001	65.712	0
241	1.9832	75.57	80.94	1.6443	-0.3555	968.8974359	0.032886249	-0.035552402	20	0	10.0002	65.7117	0
242	1.9833	75.82	81.016	1.6449	-0.3553	972.0512821	0.032898249	-0.035529402	20	0	10.001	65.7109	0
243	1.9834	75.95	81.056	1.6453	-0.3552	973.7435897	0.032906399	-0.035518402	20	0	10.0006	65.7107	0
244	1.9836	76.23	81.131	1.6461	-0.355	977.3333333	0.032921549	-0.035498002	20	0	10.0018	65.71	0
245	1.9838	76.41	81.207	1.6468	-0.3548	979.6410256	0.032936049	-0.035475802	20	0	10.0014	65.709	0
246	1.9839	76.59	81.246	1.6471	-0.3546	981.9487179	0.032942349	-0.035464002	20	0	9.9998	65.7084	0
247	1.9839	76.69	81.283	1.6475	-0.3545	983.2307692	0.032949249	-0.035453802	20	0	10.0002	65.7083	0
248	1.984	76.81	81.322	1.6477	-0.3544	984.6923077	0.032954299	-0.035442002	20	0	9.9993	65.7084	0
249	1.9841	76.95	81.361	1.6482	-0.3543	986.5897436	0.032964399	-0.035431002	20	0	9.9989	65.7087	0
250	1.9843	77.17	81.435	1.6488	-0.3541	989.3333333	0.032976349	-0.035410402	20	0	9.9993	65.7095	0
251	1.9844	77.33	81.474	1.6492	-0.354	991.4358974	0.032983949	-0.035398602	20	0	9.9998	65.7095	0
252	1.9845	77.45	81.511	1.6496	-0.3539	992.9230769	0.032992749	-0.035388402	20	0	9.9998	65.7098	0
253	1.9845	77.58	81.55	1.6499	-0.3538	994.6153846	0.032997799	-0.035376602	20	0	9.9998	65.7103	0
254	1.9846	77.69	81.586	1.6504	-0.3536	996.0769231	0.033008499	-0.035364802	20	0	10.0002	65.7104	0
255	1.9847	77.83	81.625	1.6507	-0.3535	997.7692308	0.033014199	-0.035352802	20	0	9.9998	65.7107	0
256	1.9848	77.94	81.664	1.651	-0.3534	999.2307692	0.033020499	-0.035342602	20	0	10.0002	65.7107	0
257	1.9849	78.06	81.7	1.6514	-0.3533	1000.717949	0.033028049	-0.035330002	20	0	10.0006	65.7114	0
258	1.985	78.2	81.739	1.6517	-0.3532	1002.615385	0.033034999	-0.035320602	20	0	10.0002	65.7112	0
259	1.9851	78.34	81.775	1.6521	-0.3531	1004.307692	0.033041899	-0.035309602	20	0	9.9998	65.7112	0
260	1.9852	78.47	81.813	1.6525	-0.353	1005.974359	0.033050099	-0.035299202	20	0	10.0006	65.7112	0
261	1.9852	78.58	81.852	1.6528	-0.3529	1007.461538	0.033056399	-0.035286602	20	0	10.0002	65.7112	0
262	1.9854	78.81	81.927	1.6535	-0.3527	1010.410256	0.033070899	-0.035265402	20	0	9.9998	65.7113	0
263	1.9855	78.96	81.966	1.6539	-0.3525	1012.307692	0.033077199	-0.035254402	20	0	9.9998	65.7114	0
264	1.9856	79.08	82.001	1.6542	-0.3524	1013.794872	0.033084749	-0.035243202	20	0	9.9998	65.7115	0
265	1.9857	79.21	82.04	1.6546	-0.3523	1015.461538	0.033092349	-0.035231402	20	0	10.0006	65.7116	0
266	1.9858	79.34	82.077	1.6549	-0.3522	1017.153846	0.033097999	-0.035218802	20	0	10.0002	65.7116	0
267	1.9859	79.58	82.154	1.6556	-0.352	1020.307692	0.033112499	-0.035196802	20	0	10.001	65.7112	0
268	1.986	79.7	82.19	1.656	-0.3519	1021.794872	0.033120049	-0.035187402	20	0	10.0002	65.7111	0
269	1.9862	79.98	82.268	1.6566	-0.3516	1025.384615	0.033132649	-0.035162802	20	0	10.0014	65.7103	0
270	1.9863	80.09	82.303	1.657	-0.3515	1026.846154	0.033140849	-0.035152602	20	0	10.0014	65.7098	0
271	1.9865	80.34	82.38	1.6578	-0.3513	1030.025641	0.033155349	-0.035129802	20	0	10.0006	65.7088	0
272	1.9865	80.46	82.417	1.6582	-0.3512	1031.487179	0.033164149	-0.035118802	20	0	10.0014	65.7081	0
273	1.9866	80.6	82.455	1.6586	-0.3511	1033.384615	0.033171099	-0.035106802	20	0	10.001	65.7077	0
274	1.9868	80.82	82.529	1.6594	-0.3508	1036.128205	0.033188099	-0.035084802	20	0	10.0002	65.7073	0
275	1.9869	80.97	82.566	1.6597	-0.3507	1038.025641	0.033194399	-0.035073002	20	0	9.9993	65.7074	0
276	1.987	81.08	82.602	1.6599	-0.3506	1039.487179	0.033198199	-0.035062002	20	0	9.9998	65.7077	0
277	1.9871	81.23	82.64	1.6604	-0.3505	1041.384615	0.033208299	-0.035049402	20	0	9.9998	65.708	0
278	1.9872	81.48	82.714	1.661	-0.3503	1044.564103	0.033220899	-0.035027202	20	0	9.9998	65.7085	0
279	1.9874	81.71	82.787	1.6619	-0.35	1047.512821	0.033237249	-0.035004402	20	0	9.9998	65.7092	0
280	1.9875	81.82	82.825	1.6622	-0.3499	1048.974359	0.033244199	-0.034993402	20	0	10.0002	65.7096	0
281	1.9876	81.95	82.863	1.6626	-0.3498	1050.666667	0.033251749	-0.034981602	20	0	9.9998	65.7098	0
282	1.9877	82.08	82.898	1.6629	-0.3497	1052.358974	0.033257449	-0.034972002	20	0	9.9998	65.7103	0
283	1.9878	82.23	82.936	1.6632	-0.3496	1054.25641	0.033264349	-0.034958602	20	0	9.9998	65.7105	0
284	1.9879	82.46	83.009	1.6639	-0.3494	1057.205128	0.033278849	-0.034936602	20	0	10.0002	65.711	0
285	1.988	82.58	83.047	1.6644	-0.3493	1058.666667	0.033288299	-0.034925602	20	0	10.0002	65.7109	0
286	1.9881	82.72	83.083	1.6647	-0.3491	1060.564103	0.033293349	-0.034913002	20	0	10.0006	65.7109	0
287	1.9883	82.97	83.159	1.6655	-0.3489	1063.74359	0.033309749	-0.034890002	20	0	10.001	65.7106	0
288	1.9884	83.09	83.194	1.6658	-0.3488	1065.205128	0.033315399	-0.034879802	20	0	10.001	65.7104	0
289	1.9885	83.2	83.232	1.6662	-0.3487	1066.692308	0.033324249	-0.034867202	20	0	9.9998	65.7101	0
290	1.9885	83.33	83.267	1.6665	-0.3486	1068.358974	0.033330549	-0.034857002	20	0	10.0002	65.7099	0
291	1.9886	83.46	83.305	1.6667	-0.3485	1070.051282	0.033334949	-0.034845202	20	0	10.0014	65.7095	0
292	1.9887	83.58	83.342	1.6672	-0.3483	1071.538462	0.033344399	-0.034834202	20	0	10.001	65.7089	0
293	1.9888	83.69	83.377	1.6676	-0.3482	1073	0.033351349	-0.034822202	20	0	10.0014	65.7083	0
294	1.9889	83.83	83.415	1.668	-0.3481	1074.692308	0.033359549	-0.034808802	20	0	10.001	65.7078	0
295	1.989	83.97	83.453	1.6684	-0.348	1076.589744	0.033367099	-0.034797802	20	0	10.0006	65.7074	0
296	1.9891	84.22	83.525	1.669	-0.3477	1079.74359	0.033380349	-0.034774202	20	0	10.001	65.7068	0
297	1.9892	84.32	83.561	1.6694	-0.3476	1081.025641	0.033387249	-0.034763202	20	0	10.0006	65.7065	0
298	1.9893	84.48	83.598	1.6697	-0.3475	1083.128205	0.033394799	-0.034752202	20	0	9.9993	65.7064	0
299	1.9895	84.71	83.671	1.6704	-0.3473	1086.076923	0.033408699	-0.034727602	20	0	10.0002	65.7067	0
300	1.9896	84.85	83.708	1.6708	-0.3472	1087.769231	0.033416249	-0.034716602	20	0	9.9998	65.707	0
301	1.9898	85.08	83.779	1.6716	-0.3469	1090.717949	0.033431349	-0.034692202	20	0	9.9998	65.7078	0
302	1.9898	85.21	83.817	1.6719	-0.3468	1092.410256	0.033438949	-0.034680402	20	0	9.9993	65.7082	0
303	1.9899	85.32	83.851	1.6724	-0.3467	1093.871795	0.033447749	-0.034669402	20	0	9.9989	65.7085	0
304	1.99	85.45	83.889	1.6727	-0.3466	1095.564103	0.033453449	-0.034656802	20	0	9.9993	65.709	0
305	1.9901	85.6	83.926	1.673	-0.3465	1097.461538	0.033460999	-0.034645602	20	0	10.0006	65.7091	0
306	1.9902	85.72	83.961	1.6734	-0.3463	1098.923077	0.033468549	-0.034633002	20	0	9.9993	65.7092	0
307	1.9903	85.83	83.999	1.6738	-0.3462	1100.410256	0.033476749	-0.034620402	20	0	9.9998	65.7095	0
308	1.9904	85.96	84.036	1.6742	-0.3461	1102.102564	0.033483699	-0.034608602	20	0	10.0006	65.7099	0
309	1.9905	86.09	84.071	1.6747	-0.346	1103.769231	0.033493749	-0.034596802	20	0	10.0006	65.7102	0
310	1.9906	86.34	84.145	1.6753	-0.3457	1106.948718	0.033506999	-0.034573202	20	0	10.0006	65.7102	0
311	1.9907	86.47	84.181	1.6757	-0.3456	1108.615385	0.033513949	-0.034560602	20	0	10.0002	65.7101	0
312	1.9908	86.59	84.219	1.676	-0.3455	1110.102564	0.033520249	-0.034548602	20	0	10.0006	65.7099	0
313	1.9909	86.72	84.254	1.6765	-0.3454	1111.794872	0.033529049	-0.034537602	20	0	9.9998	65.7098	0
314	1.991	86.83	84.291	1.6769	-0.3453	1113.25641	0.033537249	-0.034525002	20	0	10.001	65.7096	0
315	1.9911	87	84.328	1.6771	-0.3451	1115.358974	0.033541049	-0.034513202	20	0	10.0006	65.7094	0
316	1.9912	87.21	84.399	1.678	-0.3449	1118.102564	0.033559299	-0.034488802	20	0	10.0006	65.7087	0
317	1.9913	87.36	84.436	1.6782	-0.3448	1120	0.033563699	-0.034476202	20	0	10.0006	65.7083	0
318	1.9915	87.57	84.508	1.679	-0.3445	1122.74359	0.033579449	-0.034452602	20	0	10.001	65.7074	0
319	1.9916	87.71	84.542	1.6793	-0.3444	1124.435897	0.033586399	-0.034439802	20	0	10.0006	65.7068	0
320	1.9917	87.84	84.579	1.6798	-0.3443	1126.128205	0.033595849	-0.034426402	20	0	10.0006	65.7063	0
321	1.9918	87.99	84.616	1.68	-0.3441	1128.025641	0.033600249	-0.034413802	20	0	10.0014	65.7059	0
322	1.9919	88.2	84.687	1.6809	-0.3439	1130.74359	0.033617299	-0.034389402	20	0	10.0002	65.7054	0
323	1.992	88.33	84.724	1.6811	-0.3438	1132.435897	0.033622299	-0.034378402	20	0	9.9998	65.7055	0
324	1.9921	88.43	84.759	1.6816	-0.3437	1133.717949	0.033631149	-0.034367402	20	0	9.9993	65.7055	0
325	1.9922	88.61	84.796	1.6819	-0.3435	1136.025641	0.033638699	-0.034354802	20	0	9.9989	65.7058	0
326	1.9924	88.84	84.868	1.6828	-0.3433	1138.974359	0.033655699	-0.034331002	20	0	10.0002	65.7063	0
327	1.9924	88.97	84.904	1.683	-0.3432	1140.666667	0.033660749	-0.034317602	20	0	10.0006	65.7066	0
328	1.9925	89.09	84.938	1.6834	-0.3431	1142.128205	0.033667049	-0.034305002	20	0	9.9998	65.7066	0
329	1.9926	89.22	84.975	1.6839	-0.3429	1143.820513	0.033677149	-0.034292402	20	0	9.9998	65.7066	0
330	1.9927	89.33	85.01	1.6841	-0.3428	1145.307692	0.033681549	-0.034280602	20	0	9.9998	65.7068	0
331	1.9928	89.48	85.046	1.6844	-0.3427	1147.205128	0.033688499	-0.034268802	20	0	9.9998	65.7069	0
332	1.993	89.69	85.118	1.6852	-0.3424	1149.923077	0.033703599	-0.034244402	20	0	10.0002	65.7071	0
333	1.9931	89.84	85.155	1.6856	-0.3423	1151.820513	0.033711199	-0.034230202	20	0	10.0006	65.707	0
334	1.9931	89.94	85.192	1.6859	-0.3422	1153.102564	0.033717499	-0.034219202	20	0	10.0002	65.7069	0
335	1.9932	90.07	85.226	1.6863	-0.3421	1154.769231	0.033726299	-0.034205002	20	0	9.9998	65.7069	0
336	1.9933	90.22	85.263	1.6866	-0.3419	1156.666667	0.033732599	-0.034193202	20	0	10.0006	65.7068	0
337	1.9934	90.34	85.297	1.687	-0.3418	1158.153846	0.033740799	-0.034180602	20	0	10.001	65.7067	0
338	1.9935	90.45	85.334	1.6874	-0.3417	1159.641026	0.033748349	-0.034167002	20	0	10.001	65.7064	0
339	1.9936	90.62	85.37	1.6878	-0.3416	1161.74359	0.033756549	-0.034155202	20	0	10.0014	65.7061	0
340	1.9937	90.83	85.442	1.6885	-0.3413	1164.487179	0.033769799	-0.034130002	20	0	10.001	65.7054	0
341	1.9938	90.98	85.478	1.6889	-0.3412	1166.384615	0.033778599	-0.034119002	20	0	10.0006	65.7046	0
342	1.9939	91.09	85.512	1.6894	-0.341	1167.846154	0.033787449	-0.034104002	20	0	10.0002	65.7042	0
343	1.994	91.22	85.549	1.6896	-0.3409	1169.538462	0.033791849	-0.034094602	20	0	10.0002	65.7041	0
344	1.9941	91.34	85.585	1.69	-0.3408	1171	0.033800649	-0.034080402	20	0	9.9998	65.7042	0
345	1.9942	91.49	85.619	1.6904	-0.3407	1172.897436	0.033808849	-0.034069402	20	0	9.9998	65.7045	0
346	1.9943	91.6	85.656	1.6908	-0.3406	1174.384615	0.033815149	-0.034056002	20	0	9.9998	65.7048	0
347	1.9944	91.72	85.69	1.6911	-0.3404	1175.846154	0.033822749	-0.034041802	20	0	9.9998	65.7052	0
348	1.9944	91.83	85.726	1.6914	-0.3403	1177.333333	0.033827749	-0.034030602	20	0	9.9993	65.7055	0
349	1.9945	91.95	85.763	1.692	-0.3402	1178.820513	0.033839749	-0.034016602	20	0	9.9993	65.7059	0
350	1.9946	92.09	85.798	1.6923	-0.34	1180.692308	0.033846049	-0.034003202	20	0	9.9993	65.7063	0
351	1.9947	92.23	85.834	1.6925	-0.3399	1182.384615	0.033849849	-0.033991202	20	0	10.0002	65.7068	0
352	1.9948	92.36	85.871	1.6931	-0.3398	1184.076923	0.033861149	-0.033978602	20	0	9.9993	65.707	0
353	1.995	92.57	85.941	1.6937	-0.3395	1186.820513	0.033873149	-0.033952602	20	0	9.9993	65.7077	0
354	1.9951	92.7	85.976	1.6942	-0.3394	1188.512821	0.033883249	-0.033940802	20	0	10.001	65.7079	0
355	1.9951	92.83	86.013	1.6945	-0.3393	1190.179487	0.033890799	-0.033926602	20	0	10.0006	65.7079	0
356	1.9952	92.95	86.048	1.6949	-0.3391	1191.666667	0.033898349	-0.033913202	20	0	10.0006	65.7077	0
357	1.9953	93.08	86.083	1.6953	-0.339	1193.358974	0.033905299	-0.033903002	20	0	10.001	65.7075	0
358	1.9954	93.25	86.119	1.6957	-0.3389	1195.461538	0.033913499	-0.033888802	20	0	9.9998	65.7073	0
359	1.9956	93.48	86.189	1.6965	-0.3386	1198.410256	0.033929249	-0.033862802	20	0	10.0002	65.7068	0
360	1.9957	93.59	86.226	1.6967	-0.3385	1199.871795	0.033934899	-0.033847802	20	0	10.0006	65.7067	0
361	1.9957	93.71	86.259	1.6972	-0.3384	1201.358974	0.033943749	-0.033837602	20	0	10.001	65.7064	0
362	1.9958	93.82	86.295	1.6975	-0.3382	1202.846154	0.033950049	-0.033822602	20	0	10.0006	65.7062	0
363	1.9959	93.97	86.332	1.6979	-0.3381	1204.74359	0.033958199	-0.033810802	20	0	10.0002	65.7059	0
364	1.996	94.08	86.366	1.6983	-0.338	1206.205128	0.033965149	-0.033799002	20	0	10.0014	65.7056	0
365	1.9961	94.23	86.403	1.6985	-0.3378	1208.102564	0.033970799	-0.033784002	20	0	10.0014	65.7051	0
366	1.9962	94.36	86.44	1.6991	-0.3377	1209.794872	0.033982149	-0.033771402	20	0	10.0018	65.7046	0
367	1.9964	94.59	86.51	1.6997	-0.3374	1212.74359	0.033993499	-0.033743802	20	0	10.0006	65.7036	0
368	1.9964	94.73	86.544	1.7001	-0.3373	1214.435897	0.034002949	-0.033731002	20	0	10.0006	65.7033	0
369	1.9965	94.86	86.579	1.7005	-0.3372	1216.102564	0.034010549	-0.033720002	20	0	10.0006	65.7033	0
370	1.9967	95.1	86.65	1.7014	-0.3369	1219.282051	0.034027549	-0.033692402	20	0	10.0006	65.7033	0
371	1.9968	95.22	86.686	1.7018	-0.3368	1220.74359	0.034035099	-0.033679002	20	0	9.9998	65.7034	0
372	1.997	95.48	86.757	1.7025	-0.3365	1224.128205	0.034050249	-0.033651402	20	0	10.0002	65.7036	0
373	1.997	95.6	86.793	1.7028	-0.3364	1225.589744	0.034056549	-0.033638002	20	0	10.0002	65.7037	0
374	1.9971	95.71	86.827	1.7031	-0.3363	1227.076923	0.034062849	-0.033625402	20	0	10.0002	65.7038	0
375	1.9973	95.96	86.899	1.704	-0.336	1230.230769	0.034079199	-0.033599402	20	0	10.0002	65.704	0
376	1.9974	96.09	86.934	1.7043	-0.3359	1231.923077	0.034086149	-0.033586002	20	0	9.9998	65.704	0
377	1.9975	96.22	86.969	1.7047	-0.3357	1233.615385	0.034094949	-0.033571802	20	0	10.0006	65.7043	0
378	1.9976	96.34	87.003	1.7051	-0.3356	1235.076923	0.034102549	-0.033559202	20	0	10.0006	65.7045	0
379	1.9977	96.48	87.039	1.7055	-0.3355	1236.974359	0.034110099	-0.033546602	20	0	10.0002	65.7045	0
380	1.9978	96.73	87.109	1.7063	-0.3352	1240.128205	0.034125199	-0.033519002	20	0	10.0006	65.7046	0
381	1.998	96.98	87.182	1.7071	-0.3349	1243.307692	0.034142249	-0.033492202	20	0	10.0006	65.7045	0
382	1.9982	97.22	87.251	1.7079	-0.3347	1246.461538	0.034157349	-0.033466202	20	0	10.0006	65.7044	0
383	1.9984	97.45	87.322	1.7087	-0.3344	1249.410256	0.034173099	-0.033438602	20	0	10.0006	65.704	0
384	1.9984	97.6	87.359	1.7091	-0.3342	1251.307692	0.034181299	-0.033423602	20	0	10.0014	65.7038	0
385	1.9985	97.72	87.393	1.7094	-0.3341	1252.794872	0.034188249	-0.033413402	20	0	10.0006	65.7035	0
386	1.9986	97.85	87.429	1.7098	-0.334	1254.461538	0.034196449	-0.033399202	20	0	10.001	65.7033	0
387	1.9987	97.96	87.464	1.7102	-0.3339	1255.948718	0.034204649	-0.033385002	20	0	10.0006	65.7029	0
388	1.9988	98.1	87.499	1.7104	-0.3337	1257.641026	0.034208399	-0.033372402	20	0	10.0006	65.7028	0
389	1.9989	98.21	87.534	1.7109	-0.3336	1259.102564	0.034217249	-0.033355802	20	0	10.0002	65.7025	0
390	1.999	98.36	87.57	1.7113	-0.3334	1261	0.034226049	-0.033343202	20	0	10.0002	65.7024	0
391	1.9991	98.6	87.64	1.712	-0.3332	1264.153846	0.034239299	-0.033318002	20	0	10.0002	65.7026	0
392	1.9992	98.74	87.674	1.7123	-0.333	1265.846154	0.034246849	-0.033303802	20	0	9.9998	65.7026	0
393	1.9994	98.97	87.746	1.7132	-0.3328	1268.794872	0.034263249	-0.033277002	20	0	10.0002	65.7028	0
394	1.9995	99.08	87.78	1.7135	-0.3326	1270.282051	0.034269549	-0.033262802	20	0	10.0002	65.7031	0
395	1.9996	99.23	87.816	1.7139	-0.3325	1272.179487	0.034278349	-0.033249402	20	0	9.9998	65.7031	0
396	1.9997	99.46	87.886	1.7147	-0.3322	1275.128205	0.034294749	-0.033221802	20	0	10.0002	65.7035	0
397	1.9998	99.59	87.921	1.7151	-0.3321	1276.820513	0.034302299	-0.033208402	20	0	10.0002	65.7035	0
398	1.9999	99.71	87.955	1.7154	-0.332	1278.282051	0.034307999	-0.033195002	20	0	9.9998	65.7035	0
399	2	99.85	87.991	1.7158	-0.3318	1280.179487	0.034316149	-0.033182402	20	0	10.0002	65.7035	0
400	2.0002	100.08	88.061	1.7165	-0.3315	1283.128205	0.034330649	-0.033153202	20	0	10.0006	65.7033	0
401	2.0003	100.22	88.098	1.7169	-0.3314	1284.820513	0.034338849	-0.033139002	20	0	10.0006	65.7033	0
402	2.0003	100.35	88.134	1.7174	-0.3313	1286.512821	0.034347049	-0.033125602	20	0	10.0002	65.7032	0
403	2.0004	100.46	88.168	1.7178	-0.3311	1287.974359	0.034355249	-0.033112202	20	0	9.9998	65.703	0
404	2.0005	100.61	88.204	1.7181	-0.331	1289.871795	0.034362199	-0.033098002	20	0	10.0006	65.7028	0
405	2.0007	100.84	88.274	1.7189	-0.3307	1292.820513	0.034378549	-0.033072002	20	0	10.0006	65.7022	0
406	2.0008	100.99	88.309	1.7194	-0.3306	1294.717949	0.034387399	-0.033056202	20	0	10.0002	65.7019	0
407	2.0009	101.09	88.343	1.7198	-0.3304	1296	0.034395599	-0.033043602	20	0	10.0006	65.7016	0
408	2.001	101.24	88.379	1.7201	-0.3303	1297.897436	0.034401899	-0.033028602	20	0	9.9998	65.7014	0
409	2.001	101.35	88.415	1.7205	-0.3302	1299.358974	0.034410049	-0.033016802	20	0	9.9993	65.7014	0
410	2.0011	101.47	88.448	1.7208	-0.33	1300.846154	0.034415749	-0.033001802	20	0	9.9993	65.7016	0
411	2.0012	101.61	88.484	1.7213	-0.3299	1302.74359	0.034425849	-0.032987602	20	0	10.0002	65.7018	0
412	2.0014	101.84	88.553	1.7221	-0.3296	1305.692308	0.034442199	-0.032962402	20	0	10.0006	65.7021	0
413	2.0015	101.96	88.59	1.7225	-0.3295	1307.153846	0.034449749	-0.032948202	20	0	9.9993	65.7021	0
414	2.0016	102.09	88.622	1.7228	-0.3293	1308.846154	0.034456699	-0.032932402	20	0	9.9998	65.7022	0
415	2.0016	102.24	88.658	1.7233	-0.3292	1310.74359	0.034465549	-0.032918202	20	0	10.0006	65.7023	0
416	2.0017	102.35	88.694	1.7235	-0.329	1312.205128	0.034469949	-0.032904802	20	0	9.9998	65.7024	0
417	2.0019	102.58	88.763	1.7244	-0.3288	1315.179487	0.034487599	-0.032878802	20	0	10.0006	65.7025	0
418	2.002	102.71	88.797	1.7248	-0.3286	1316.846154	0.034495799	-0.032863802	20	0	9.9998	65.7025	0
419	2.0021	102.85	88.833	1.7252	-0.3285	1318.538462	0.034503349	-0.032848802	20	0	10.0006	65.7025	0
420	2.0023	103.09	88.901	1.726	-0.3282	1321.692308	0.034519099	-0.032820402	20	0	10.0006	65.7025	0
421	2.0023	103.24	88.937	1.7264	-0.3281	1323.589744	0.034527899	-0.032806202	20	0	10.0002	65.7024	0
422	2.0025	103.47	89.007	1.7271	-0.3278	1326.538462	0.034541799	-0.032778602	20	0	10.001	65.7022	0
423	2.0026	103.6	89.042	1.7275	-0.3276	1328.230769	0.034549999	-0.032764402	20	0	10.001	65.702	0
424	2.0027	103.72	89.075	1.7278	-0.3275	1329.717949	0.034556899	-0.032751002	20	0	10.0006	65.7018	0
425	2.0028	103.85	89.111	1.7282	-0.3274	1331.384615	0.034563849	-0.032736202	20	0	10.0002	65.7016	0
426	2.0029	103.98	89.146	1.7286	-0.3272	1333.076923	0.034572649	-0.032722002	20	0	10.0002	65.7014	0
427	2.003	104.1	89.18	1.729	-0.3271	1334.564103	0.034580249	-0.032707802	20	0	10.0002	65.7011	0
428	2.003	104.21	89.216	1.7295	-0.327	1336.025641	0.034590299	-0.032695202	20	0	10.001	65.7007	0
429	2.0031	104.36	89.249	1.7298	-0.3268	1337.923077	0.034595999	-0.032681002	20	0	10.0006	65.7006	0
430	2.0032	104.49	89.285	1.7302	-0.3267	1339.615385	0.034604149	-0.032666002	20	0	9.9998	65.7005	0
431	2.0034	104.7	89.354	1.731	-0.3264	1342.358974	0.034619949	-0.032636802	20	0	9.9993	65.701	0
432	2.0035	104.84	89.389	1.7314	-0.3262	1344.051282	0.034628099	-0.032624202	20	0	9.9993	65.7014	0
433	2.0036	104.95	89.425	1.7319	-0.3261	1345.512821	0.034638199	-0.032608402	20	0	10.0002	65.7017	0
434	2.0036	105.11	89.458	1.7322	-0.326	1347.615385	0.034644499	-0.032595802	20	0	9.9998	65.702	0
435	2.0037	105.23	89.493	1.7326	-0.3258	1349.102564	0.034652699	-0.032579202	20	0	10.0002	65.7022	0
436	2.0039	105.44	89.562	1.7335	-0.3255	1351.846154	0.034669099	-0.032552402	20	0	10.0002	65.7023	0
437	2.004	105.58	89.597	1.7338	-0.3254	1353.538462	0.034675399	-0.032537402	20	0	10.0002	65.7023	0
438	2.0041	105.72	89.63	1.7341	-0.3252	1355.410256	0.034681699	-0.032523202	20	0	9.9998	65.7024	0
439	2.0042	105.84	89.666	1.7345	-0.3251	1356.897436	0.034690499	-0.032509802	20	0	10.0002	65.7024	0
440	2.0043	105.97	89.702	1.7349	-0.325	1358.589744	0.034698699	-0.032495602	20	0	10.0002	65.7027	0
441	2.0043	106.08	89.736	1.7352	-0.3248	1360.051282	0.034703099	-0.032480602	20	0	10.0002	65.7027	0
442	2.0044	106.23	89.771	1.7357	-0.3247	1361.948718	0.034713199	-0.032467202	20	0	10.001	65.7026	0
443	2.0045	106.35	89.805	1.736	-0.3245	1363.435897	0.034720149	-0.032453002	20	0	9.9998	65.7025	0
444	2.0046	106.5	89.84	1.7364	-0.3244	1365.333333	0.034727699	-0.032439602	20	0	10.001	65.7024	0
445	2.0047	106.61	89.875	1.7368	-0.3242	1366.794872	0.034735249	-0.032423202	20	0	10.001	65.7022	0
446	2.0048	106.71	89.908	1.7372	-0.3241	1368.076923	0.034743449	-0.032409002	20	0	10.0006	65.7019	0
447	2.0049	106.82	89.944	1.7375	-0.3239	1369.538462	0.034749749	-0.032394802	20	0	10.0002	65.7016	0
448	2.0049	106.99	89.98	1.7379	-0.3238	1371.641026	0.034758549	-0.032379802	20	0	10.001	65.7012	0
449	2.005	107.1	90.013	1.7383	-0.3237	1373.128205	0.034766749	-0.032366402	20	0	10.001	65.7008	0
450	2.0052	107.33	90.083	1.7392	-0.3234	1376.076923	0.034783799	-0.032338802	20	0	10.001	65.7002	0
451	2.0053	107.5	90.116	1.7396	-0.3232	1378.179487	0.034791349	-0.032323002	20	0	10.0002	65.6999	0
452	2.0054	107.61	90.151	1.7399	-0.3231	1379.666667	0.034798899	-0.032308802	20	0	9.9998	65.6998	0
453	2.0056	107.83	90.22	1.7408	-0.3228	1382.410256	0.034815299	-0.032281202	20	0	9.9998	65.7001	0
454	2.0056	107.99	90.256	1.7411	-0.3227	1384.512821	0.034822199	-0.032265402	20	0	9.9998	65.7005	0
455	2.0058	108.24	90.325	1.742	-0.3224	1387.666667	0.034840499	-0.032237002	20	0	9.9998	65.7013	0
456	2.0059	108.35	90.36	1.7424	-0.3222	1389.153846	0.034847449	-0.032220402	20	0	9.9998	65.7018	0
457	2.006	108.47	90.392	1.7428	-0.3221	1390.615385	0.034856899	-0.032207802	20	0	9.9998	65.7022	0
458	2.0061	108.6	90.428	1.7433	-0.3219	1392.307692	0.034865099	-0.032192002	20	0	9.9993	65.7027	0
459	2.0062	108.71	90.462	1.7436	-0.3218	1393.769231	0.034872649	-0.032178602	20	0	9.9998	65.7028	0
460	2.0062	108.86	90.496	1.744	-0.3216	1395.666667	0.034880199	-0.032163002	20	0	10.0006	65.7032	0
461	2.0064	109.08	90.564	1.7447	-0.3214	1398.410256	0.034894699	-0.032135402	20	0	10.0002	65.7032	0
462	2.0065	109.24	90.6	1.7452	-0.3212	1400.512821	0.034903499	-0.032120402	20	0	10.0006	65.7034	0
463	2.0067	109.47	90.668	1.746	-0.3209	1403.487179	0.034920549	-0.032090402	20	0	10.0002	65.7034	0
464	2.0068	109.62	90.703	1.7462	-0.3208	1405.384615	0.034924949	-0.032076202	20	0	10.0006	65.7033	0
465	2.0069	109.73	90.736	1.7468	-0.3206	1406.846154	0.034935049	-0.032062002	20	0	10.0006	65.7031	0
466	2.0069	109.87	90.771	1.7471	-0.3205	1408.538462	0.034942599	-0.032046202	20	0	10.001	65.7027	0
467	2.0071	110.1	90.839	1.7479	-0.3202	1411.487179	0.034957699	-0.032018602	20	0	10.001	65.7016	0
468	2.0072	110.21	90.874	1.7483	-0.32	1412.948718	0.034966549	-0.032002802	20	0	10.001	65.701	0
469	2.0073	110.36	90.908	1.7488	-0.3199	1414.846154	0.034975349	-0.031987202	20	0	10.001	65.7003	0
470	2.0074	110.47	90.941	1.7491	-0.3197	1416.333333	0.034982899	-0.031973602	20	0	10.0006	65.6998	0
471	2.0075	110.61	90.977	1.7495	-0.3196	1418.025641	0.034989199	-0.031960202	20	0	10.0006	65.6995	0
472	2.0076	110.72	91.009	1.7499	-0.3195	1419.487179	0.034998049	-0.031945402	20	0	10.0002	65.6993	0
473	2.0076	110.84	91.044	1.7503	-0.3193	1420.974359	0.035005599	-0.031930402	20	0	9.9998	65.6991	0
474	2.0077	110.97	91.08	1.7507	-0.3191	1422.666667	0.035014449	-0.031914602	20	0	9.9993	65.6991	0
475	2.0078	111.11	91.113	1.7511	-0.319	1424.538462	0.035021349	-0.031900402	20	0	9.9993	65.6992	0
476	2.0079	111.23	91.148	1.7515	-0.3189	1426.025641	0.035030199	-0.031885402	20	0	9.9993	65.6996	0
477	2.008	111.36	91.181	1.7519	-0.3187	1427.717949	0.035038399	-0.031872002	20	0	9.9998	65.7	0
478	2.0081	111.48	91.215	1.7523	-0.3186	1429.179487	0.035046549	-0.031855402	20	0	9.9993	65.7003	0
479	2.0082	111.58	91.25	1.7527	-0.3184	1430.461538	0.035054749	-0.031841202	20	0	9.9993	65.7008	0
480	2.0082	111.71	91.284	1.7531	-0.3183	1432.128205	0.035062349	-0.031827802	20	0	9.9993	65.7012	0
481	2.0083	111.84	91.319	1.7535	-0.3181	1433.820513	0.035070499	-0.031812802	20	0	9.9993	65.7017	0
482	2.0084	111.97	91.354	1.754	-0.318	1435.512821	0.035079349	-0.031796402	20	0	9.9989	65.7021	0
483	2.0085	112.1	91.388	1.7543	-0.3178	1437.205128	0.035086899	-0.031782202	20	0	9.9989	65.7024	0
484	2.0086	112.23	91.422	1.7548	-0.3177	1438.871795	0.035095749	-0.031767202	20	0	9.9989	65.7028	0
485	2.0087	112.35	91.457	1.7552	-0.3175	1440.358974	0.035103299	-0.031751402	20	0	10.0002	65.7033	0
486	2.0088	112.5	91.49	1.7555	-0.3174	1442.25641	0.035110849	-0.031738002	20	0	10.0002	65.7035	0
487	2.0089	112.61	91.526	1.756	-0.3172	1443.717949	0.035119049	-0.031723002	20	0	10.0002	65.7036	0
488	2.0089	112.73	91.558	1.7562	-0.3171	1445.205128	0.035124099	-0.031707202	20	0	10.0006	65.7038	0
489	2.009	112.86	91.593	1.7568	-0.3169	1446.897436	0.035135449	-0.031692202	20	0	10.0002	65.7037	0
490	2.0091	112.99	91.629	1.7572	-0.3168	1448.589744	0.035143599	-0.031677202	20	0	10.0006	65.7036	0
491	2.0093	113.22	91.696	1.758	-0.3165	1451.538462	0.035159999	-0.031648002	20	0	10.0002	65.7032	0
492	2.0094	113.35	91.732	1.7585	-0.3163	1453.205128	0.035169449	-0.031632402	20	0	10.0006	65.703	0
493	2.0095	113.47	91.764	1.7587	-0.3162	1454.692308	0.035173249	-0.031618202	20	0	10.0002	65.7029	0
494	2.0095	113.58	91.799	1.7592	-0.316	1456.153846	0.035183349	-0.031603202	20	0	10.0002	65.7028	0
495	2.0096	113.75	91.832	1.7596	-0.3159	1458.282051	0.035192149	-0.031588202	20	0	10.0002	65.7027	0
496	2.0098	113.96	91.902	1.7604	-0.3156	1461	0.035207249	-0.031558201	20	0	10.0002	65.7023	0
497	2.0099	114.11	91.935	1.7607	-0.3154	1462.897436	0.035214199	-0.031543201	20	0	10.0006	65.7019	0
498	2.0101	114.32	92.003	1.7616	-0.3151	1465.641026	0.035231849	-0.031512401	20	0	10.001	65.701	0
499	2.0102	114.47	92.038	1.7619	-0.315	1467.538462	0.035237499	-0.031497401	20	0	10.001	65.7006	0
500	2.0102	114.6	92.073	1.7625	-0.3148	1469.230769	0.035249499	-0.031483201	20	0	10.001	65.7002	0
501	2.0103	114.73	92.105	1.7627	-0.3147	1470.923077	0.035254549	-0.031467601	20	0	10.001	65.6997	0
502	2.0104	114.85	92.14	1.763	-0.3145	1472.384615	0.035260849	-0.031451801	20	0	10.0006	65.6993	0
503	2.0105	114.96	92.176	1.7636	-0.3144	1473.871795	0.035271549	-0.031436801	20	0	10.0006	65.6989	0
504	2.0106	115.11	92.209	1.764	-0.3142	1475.769231	0.035280399	-0.031421801	20	0	9.9993	65.6986	0
505	2.0107	115.22	92.243	1.7644	-0.3141	1477.230769	0.035287949	-0.031407601	20	0	9.9998	65.6985	0
506	2.0108	115.34	92.279	1.7648	-0.3139	1478.717949	0.035296149	-0.031391001	20	0	9.9998	65.6986	0
507	2.0109	115.45	92.311	1.7652	-0.3138	1480.179487	0.035303049	-0.031376801	20	0	9.9998	65.6988	0
508	2.0109	115.6	92.346	1.7656	-0.3136	1482.076923	0.035312499	-0.031360401	20	0	9.9989	65.6992	0
509	2.011	115.73	92.379	1.766	-0.3135	1483.769231	0.035320099	-0.031345401	20	0	9.9993	65.6997	0
510	2.0112	115.96	92.449	1.7668	-0.3131	1486.717949	0.035335849	-0.031313801	20	0	9.9993	65.7	0
511	2.0113	116.08	92.481	1.7673	-0.313	1488.205128	0.035345899	-0.031301201	20	0	9.9993	65.7005	0
512	2.0114	116.24	92.516	1.7676	-0.3129	1490.307692	0.035352849	-0.031285401	20	0	9.9998	65.7011	0
513	2.0115	116.36	92.552	1.7681	-0.3127	1491.794872	0.035361649	-0.031268001	20	0	9.9993	65.7012	0
514	2.0115	116.47	92.584	1.7686	-0.3125	1493.25641	0.035371749	-0.031254601	20	0	10.0002	65.7014	0
515	2.0116	116.59	92.619	1.7689	-0.3124	1494.74359	0.035378699	-0.031239601	20	0	10.0002	65.7016	0
516	2.0117	116.74	92.652	1.7693	-0.3122	1496.641026	0.035386249	-0.031224001	20	0	9.9998	65.7016	0
517	2.0118	116.87	92.686	1.7697	-0.3121	1498.307692	0.035394449	-0.031209001	20	0	10.0002	65.7019	0
518	2.0119	117	92.721	1.7701	-0.3119	1500	0.035402649	-0.031192401	20	0	10.001	65.7021	0
519	2.0121	117.21	92.788	1.7709	-0.3116	1502.74359	0.035417749	-0.031161601	20	0	10.0002	65.7021	0
520	2.0122	117.36	92.822	1.7713	-0.3115	1504.641026	0.035426599	-0.031146601	20	0	10.0002	65.7021	0
521	2.0123	117.59	92.892	1.7722	-0.3112	1507.589744	0.035444849	-0.031115801	20	0	10.0002	65.7022	0
522	2.0124	117.74	92.925	1.7726	-0.311	1509.487179	0.035452399	-0.031102401	20	0	10.001	65.7021	0
523	2.0125	117.86	92.96	1.773	-0.3109	1510.974359	0.035460599	-0.031085201	20	0	10.0002	65.702	0
524	2.0126	117.99	92.995	1.7733	-0.3107	1512.641026	0.035466899	-0.031070201	20	0	10.0002	65.7019	0
525	2.0127	118.12	93.027	1.774	-0.3105	1514.333333	0.035479499	-0.031054401	20	0	10.001	65.7017	0
526	2.0128	118.35	93.096	1.7746	-0.3102	1517.282051	0.035492749	-0.031022001	20	0	10.0006	65.7009	0
527	2.0129	118.48	93.128	1.7751	-0.3101	1518.974359	0.035501599	-0.031007801	20	0	10.0006	65.7006	0
528	2.013	118.61	93.163	1.7755	-0.3099	1520.666667	0.035509149	-0.030992201	20	0	10.0006	65.7001	0
529	2.0131	118.73	93.195	1.7758	-0.3098	1522.128205	0.035516699	-0.030978801	20	0	10.0006	65.6996	0
530	2.0133	118.97	93.265	1.7766	-0.3095	1525.282051	0.035532449	-0.030947201	20	0	10.001	65.6987	0
531	2.0134	119.09	93.297	1.777	-0.3093	1526.769231	0.035539999	-0.030930601	20	0	10.001	65.6981	0
532	2.0135	119.2	93.331	1.7774	-0.3092	1528.25641	0.035547599	-0.030917201	20	0	10.0006	65.6977	0
533	2.0135	119.35	93.365	1.7779	-0.309	1530.128205	0.035557049	-0.030899801	20	0	9.9993	65.6976	0
534	2.0136	119.48	93.399	1.7783	-0.3088	1531.820513	0.035565849	-0.030884001	20	0	10.0002	65.6976	0
535	2.0137	119.61	93.434	1.7788	-0.3087	1533.512821	0.035575299	-0.030869201	20	0	9.9998	65.6979	0
536	2.0138	119.73	93.466	1.7791	-0.3085	1535	0.035582249	-0.030854201	20	0	9.9993	65.6984	0
537	2.0139	119.84	93.5	1.7796	-0.3084	1536.461538	0.035591049	-0.030838401	20	0	9.9993	65.6989	0
538	2.014	119.99	93.534	1.7801	-0.3082	1538.358974	0.035601149	-0.030821801	20	0	10.0006	65.6995	0
539	2.0141	120.11	93.567	1.7803	-0.3081	1539.846154	0.035606799	-0.030808401	20	0	9.9998	65.6998	0
540	2.0141	120.24	93.602	1.7807	-0.3079	1541.512821	0.035614999	-0.030791801	20	0	9.9998	65.7005	0
541	2.0142	120.35	93.634	1.7812	-0.3078	1543	0.035624449	-0.030777601	20	0	9.9998	65.7009	0
542	2.0143	120.47	93.668	1.7816	-0.3076	1544.461538	0.035632049	-0.030760401	20	0	9.9998	65.7013	0
543	2.0145	120.72	93.735	1.7823	-0.3073	1547.641026	0.035646499	-0.030729601	20	0	9.9998	65.7017	0
544	2.0146	120.86	93.77	1.7828	-0.3071	1549.538462	0.035656599	-0.030711401	20	0	9.9998	65.7017	0
545	2.0147	120.98	93.805	1.7833	-0.307	1551	0.035666049	-0.030697201	20	0	10.0002	65.7018	0
546	2.0148	121.11	93.837	1.7836	-0.3068	1552.692308	0.035671749	-0.030681401	20	0	10.0002	65.7017	0
547	2.0148	121.23	93.872	1.7841	-0.3067	1554.179487	0.035682449	-0.030668001	20	0	10.0002	65.7016	0
548	2.0149	121.36	93.907	1.7845	-0.3065	1555.846154	0.035690649	-0.030650001	20	0	10.001	65.7015	0
549	2.015	121.47	93.939	1.7848	-0.3064	1557.333333	0.035696299	-0.030635801	20	0	10.0002	65.7014	0
550	2.0151	121.59	93.973	1.7853	-0.3062	1558.794872	0.035706399	-0.030620801	20	0	10.0006	65.7011	0
551	2.0152	121.75	94.006	1.7857	-0.3061	1560.923077	0.035713299	-0.030605001	20	0	10.0002	65.701	0
552	2.0153	121.87	94.041	1.7861	-0.3059	1562.384615	0.035722799	-0.030588401	20	0	10.0006	65.7007	0
553	2.0154	121.98	94.075	1.7866	-0.3057	1563.871795	0.035732249	-0.030571801	20	0	10.0002	65.7004	0
554	2.0155	122.11	94.108	1.787	-0.3056	1565.538462	0.035739149	-0.030557601	20	0	10.001	65.7	0
555	2.0155	122.23	94.142	1.7874	-0.3054	1567.025641	0.035747999	-0.030542001	20	0	10.001	65.6996	0
556	2.0156	122.34	94.176	1.7878	-0.3053	1568.487179	0.035755549	-0.030525401	20	0	10.0006	65.6993	0
557	2.0157	122.46	94.209	1.7882	-0.3051	1569.974359	0.035763099	-0.030508801	20	0	10.0002	65.6991	0
558	2.0158	122.61	94.244	1.7886	-0.305	1571.871795	0.035772549	-0.030495401	20	0	10.0002	65.6988	0
559	2.0159	122.72	94.276	1.789	-0.3048	1573.333333	0.035779499	-0.030478801	20	0	10.001	65.6985	0
560	2.016	122.84	94.311	1.7894	-0.3046	1574.820513	0.035788949	-0.030462201	20	0	10.001	65.6983	0
561	2.0161	122.98	94.346	1.79	-0.3045	1576.717949	0.035799049	-0.030446601	20	0	10.0006	65.6979	0
562	2.0161	123.12	94.379	1.7903	-0.3043	1578.410256	0.035805349	-0.030431601	20	0	10.0006	65.6974	0
563	2.0162	123.23	94.413	1.7907	-0.3041	1579.871795	0.035814149	-0.030414201	20	0	10.0006	65.6973	0
564	2.0164	123.49	94.479	1.7915	-0.3038	1583.25641	0.035829299	-0.030384201	20	0	9.9993	65.6974	0
565	2.0165	123.63	94.513	1.7918	-0.3037	1584.948718	0.035836199	-0.030368401	20	0	9.9998	65.6974	0
566	2.0166	123.76	94.545	1.7923	-0.3035	1586.615385	0.035845049	-0.030352601	20	0	9.9998	65.6976	0
567	2.0167	123.86	94.579	1.7927	-0.3034	1587.897436	0.035853249	-0.030337001	20	0	10.0002	65.6976	0
568	2.0168	124	94.614	1.793	-0.3032	1589.794872	0.035859549	-0.030322001	20	0	10.0002	65.6976	0
569	2.0169	124.23	94.681	1.7938	-0.3029	1592.74359	0.035876549	-0.030289601	20	0	10.001	65.6976	0
570	2.0171	124.5	94.748	1.7947	-0.3026	1596.102564	0.035894199	-0.030258001	20	0	10.0002	65.6974	0
571	2.0172	124.61	94.783	1.7952	-0.3024	1597.589744	0.035903649	-0.030241601	20	0	9.9998	65.6974	0
572	2.0173	124.74	94.815	1.7955	-0.3023	1599.25641	0.035909949	-0.030227401	20	0	9.9998	65.6974	0
573	2.0174	124.86	94.849	1.7959	-0.3021	1600.74359	0.035918149	-0.030210001	20	0	10.0002	65.6974	0
574	2.0174	124.97	94.883	1.7963	-0.3019	1602.230769	0.035925699	-0.030194201	20	0	9.9998	65.6974	0
575	2.0175	125.1	94.916	1.7968	-0.3018	1603.897436	0.035935799	-0.030179201	20	0	10.0006	65.6974	0
576	2.0176	125.24	94.95	1.7971	-0.3016	1605.589744	0.035942099	-0.030164201	20	0	10.0006	65.6974	0
577	2.0178	125.48	95.016	1.798	-0.3013	1608.74359	0.035960349	-0.030132001	20	0	10.0002	65.6971	0
578	2.0179	125.6	95.051	1.7984	-0.3012	1610.230769	0.035967899	-0.030116201	20	0	10.001	65.6971	0
579	2.018	125.73	95.083	1.7988	-0.301	1611.923077	0.035975499	-0.030100401	20	0	10.0006	65.697	0
580	2.0181	125.98	95.152	1.7997	-0.3007	1615.076923	0.035993749	-0.030066401	20	0	10.0002	65.6965	0
581	2.0182	126.11	95.184	1.8001	-0.3005	1616.769231	0.036001949	-0.030051601	20	0	9.9998	65.6963	0
582	2.0183	126.22	95.219	1.8005	-0.3004	1618.230769	0.036010149	-0.030036601	20	0	9.9998	65.6964	0
583	2.0184	126.37	95.251	1.801	-0.3002	1620.128205	0.036019599	-0.030020801	20	0	9.9993	65.6966	0
584	2.0186	126.6	95.319	1.8018	-0.2999	1623.076923	0.036035999	-0.029987601	20	0	9.9989	65.6974	0
585	2.0187	126.72	95.351	1.8022	-0.2997	1624.564103	0.036044199	-0.029974201	20	0	9.9989	65.6978	0
586	2.0187	126.85	95.386	1.8027	-0.2996	1626.25641	0.036054249	-0.029957001	20	0	9.9989	65.6983	0
587	2.0188	126.96	95.42	1.803	-0.2994	1627.717949	0.036060549	-0.029940401	20	0	9.9993	65.6987	0
588	2.0189	127.09	95.452	1.8035	-0.2992	1629.410256	0.036069399	-0.029924601	20	0	9.9989	65.6991	0
589	2.019	127.23	95.487	1.804	-0.2991	1631.102564	0.036080099	-0.029908001	20	0	9.9993	65.6996	0
590	2.0191	127.37	95.519	1.8043	-0.2989	1633	0.036085149	-0.029893801	20	0	9.9993	65.6999	0
591	2.0193	127.59	95.587	1.805	-0.2986	1635.717949	0.036100899	-0.029860001	20	0	10.0002	65.7006	0
592	2.0194	127.73	95.619	1.8055	-0.2984	1637.615385	0.036109699	-0.029844201	20	0	9.9998	65.7007	0
593	2.0194	127.87	95.653	1.806	-0.2983	1639.307692	0.036119799	-0.029830001	20	0	10.0006	65.7006	0
594	2.0195	127.98	95.688	1.8063	-0.2981	1640.794872	0.036126749	-0.029811001	20	0	9.9998	65.7007	0
595	2.0196	128.1	95.719	1.8067	-0.298	1642.25641	0.036134299	-0.029796001	20	0	10.0002	65.7008	0
596	2.0197	128.23	95.754	1.8072	-0.2978	1643.948718	0.036143099	-0.029780201	20	0	10.0002	65.7009	0
597	2.0198	128.36	95.789	1.8077	-0.2976	1645.641026	0.036153849	-0.029763001	20	0	10.0006	65.7009	0
598	2.0199	128.47	95.821	1.808	-0.2975	1647.102564	0.036160749	-0.029746401	20	0	10.0002	65.7007	0
599	2.02	128.61	95.855	1.8085	-0.2973	1648.794872	0.036170199	-0.029731401	20	0	10.0002	65.7006	0
600	2.0201	128.72	95.887	1.8089	-0.2972	1650.282051	0.036177149	-0.029716401	20	0	10.0002	65.7004	0
601	2.0202	129	95.956	1.8097	-0.2968	1653.846154	0.036194799	-0.029682601	20	0	10.001	65.6996	0
602	2.0204	129.21	96.021	1.8106	-0.2965	1656.589744	0.036211799	-0.029649401	20	0	10.0006	65.6989	0
603	2.0205	129.33	96.056	1.811	-0.2963	1658.076923	0.036220649	-0.029634401	20	0	10.0006	65.6985	0
604	2.0206	129.48	96.088	1.8113	-0.2962	1659.974359	0.036225649	-0.029619401	20	0	10.0002	65.6982	0
605	2.0207	129.59	96.122	1.8118	-0.296	1661.435897	0.036236399	-0.029601401	20	0	10.001	65.6977	0
606	2.0207	129.72	96.153	1.8122	-0.2958	1663.128205	0.036243949	-0.029584801	20	0	10.0014	65.6972	0
607	2.0208	129.87	96.188	1.8127	-0.2957	1665.025641	0.036253399	-0.029569801	20	0	10.0002	65.6966	0
608	2.0209	129.99	96.223	1.8131	-0.2955	1666.512821	0.036262249	-0.029551601	20	0	10.0006	65.6963	0
609	2.0211	130.23	96.289	1.8139	-0.2952	1669.666667	0.036277349	-0.029521601	20	0	10.0002	65.6957	0
610	2.0212	130.37	96.321	1.8144	-0.2951	1671.358974	0.036287449	-0.029505201	20	0	10.0006	65.6957	0
611	2.0213	130.48	96.355	1.8147	-0.2949	1672.820513	0.036293749	-0.029488601	20	0	10.0002	65.6957	0
612	2.0214	130.6	96.389	1.8151	-0.2947	1674.307692	0.036301299	-0.029472801	20	0	10.0002	65.6957	0
613	2.0214	130.71	96.422	1.8157	-0.2946	1675.769231	0.036313249	-0.029455401	20	0	9.9998	65.6957	0
614	2.0215	130.86	96.455	1.8159	-0.2944	1677.666667	0.036318949	-0.029441201	20	0	9.9998	65.6958	0
615	2.0216	130.97	96.49	1.8164	-0.2942	1679.153846	0.036327149	-0.029423201	20	0	9.9998	65.6959	0
616	2.0217	131.09	96.523	1.8169	-0.2941	1680.615385	0.036337199	-0.029408201	20	0	9.9993	65.6962	0
617	2.0218	131.24	96.556	1.8172	-0.2939	1682.512821	0.036344799	-0.029390801	20	0	9.9998	65.6964	0
618	2.0219	131.37	96.59	1.8176	-0.2937	1684.205128	0.036351699	-0.029373401	20	0	9.9993	65.6967	0
619	2.022	131.48	96.623	1.8182	-0.2936	1685.692308	0.036363699	-0.029357001	20	0	9.9993	65.6971	0
620	2.022	131.6	96.656	1.8186	-0.2934	1687.153846	0.036371249	-0.029340401	20	0	9.9998	65.6975	0
621	2.0221	131.71	96.688	1.819	-0.2933	1688.641026	0.036380049	-0.029325401	20	0	9.9998	65.6978	0
622	2.0222	131.86	96.723	1.8194	-0.2931	1690.538462	0.036388899	-0.029309601	20	0	9.9993	65.6979	0
623	2.0223	131.99	96.756	1.8199	-0.2929	1692.205128	0.036397699	-0.029290601	20	0	9.9998	65.698	0
624	2.0224	132.09	96.788	1.8204	-0.2928	1693.487179	0.036407149	-0.029277201	20	0	9.9998	65.6981	0
625	2.0225	132.22	96.823	1.8207	-0.2926	1695.153846	0.036414099	-0.029260001	20	0	9.9993	65.6983	0
626	2.0226	132.35	96.855	1.8211	-0.2924	1696.846154	0.036422949	-0.029243401	20	0	10.0002	65.6983	0
627	2.0227	132.49	96.889	1.8216	-0.2923	1698.538462	0.036431099	-0.029226801	20	0	10.0002	65.6983	0
628	2.0227	132.6	96.923	1.822	-0.2921	1700	0.036439949	-0.029211001	20	0	10.0002	65.6983	0
629	2.0228	132.73	96.955	1.8224	-0.2919	1701.692308	0.036448749	-0.029193001	20	0	10.0006	65.6983	0
630	2.0229	132.85	96.989	1.8228	-0.2918	1703.179487	0.036456349	-0.029177201	20	0	9.9998	65.6983	0
631	2.023	132.98	97.023	1.8232	-0.2916	1704.846154	0.036463249	-0.029161401	20	0	10.0002	65.6983	0
632	2.0231	133.11	97.055	1.8237	-0.2914	1706.538462	0.036473349	-0.029144801	20	0	10.0002	65.6983	0
633	2.0232	133.23	97.089	1.824	-0.2913	1708.025641	0.036480899	-0.029126601	20	0	10.0002	65.6983	0
634	2.0233	133.34	97.122	1.8244	-0.2911	1709.487179	0.036487849	-0.029111001	20	0	10.0002	65.6983	0
635	2.0234	133.49	97.156	1.825	-0.291	1711.384615	0.036499199	-0.029095201	20	0	9.9993	65.6983	0
636	2.0234	133.62	97.19	1.8253	-0.2908	1713.076923	0.036506749	-0.029078601	20	0	10.0006	65.6983	0
637	2.0236	133.87	97.257	1.8262	-0.2904	1716.230769	0.036524999	-0.029044001	20	0	10.0006	65.6982	0
638	2.0237	133.98	97.29	1.8266	-0.2903	1717.717949	0.036531949	-0.029029801	20	0	10.0002	65.6981	0
639	2.0239	134.23	97.356	1.8275	-0.29	1720.871795	0.036550849	-0.028995801	20	0	10.0006	65.6978	0
640	2.024	134.36	97.389	1.8279	-0.2898	1722.564103	0.036557799	-0.028979201	20	0	10.0002	65.6976	0
641	2.0241	134.61	97.457	1.8289	-0.2895	1725.717949	0.036577299	-0.028946201	20	0	10.001	65.6967	0
642	2.0242	134.74	97.489	1.8291	-0.2893	1727.410256	0.036582999	-0.028928801	20	0	10.001	65.6962	0
643	2.0243	134.85	97.523	1.8296	-0.2891	1728.897436	0.036591799	-0.028912201	20	0	10.0006	65.6957	0
644	2.0244	135	97.557	1.83	-0.289	1730.769231	0.036599999	-0.028895601	20	0	10.001	65.6955	0
645	2.0246	135.23	97.623	1.831	-0.2886	1733.74359	0.036619549	-0.028863401	20	0	10.0006	65.6951	0
646	2.0247	135.35	97.656	1.8314	-0.2885	1735.205128	0.036627099	-0.028846801	20	0	10.0006	65.6951	0
647	2.0247	135.46	97.69	1.8317	-0.2883	1736.692308	0.036634649	-0.028829401	20	0	10.0002	65.6949	0
648	2.0248	135.61	97.724	1.8323	-0.2881	1738.589744	0.036645999	-0.028813001	20	0	10.0006	65.6949	0
649	2.0249	135.74	97.756	1.8326	-0.288	1740.25641	0.036651699	-0.028797201	20	0	10.0006	65.6949	0
650	2.0251	136	97.824	1.8335	-0.2876	1743.641026	0.036669949	-0.028762401	20	0	9.9998	65.6952	0
651	2.0253	136.25	97.889	1.8343	-0.2873	1746.794872	0.036685699	-0.028729401	20	0	9.9993	65.6956	0
652	2.0254	136.5	97.956	1.8351	-0.287	1749.948718	0.036702099	-0.028697801	20	0	9.9998	65.696	0
653	2.0256	136.71	98.022	1.8359	-0.2866	1752.692308	0.036718499	-0.028663801	20	0	10.0002	65.6964	0
654	2.0257	136.86	98.056	1.8364	-0.2865	1754.589744	0.036727949	-0.028645001	20	0	10.0006	65.6964	0
655	2.0258	137.01	98.089	1.8369	-0.2863	1756.487179	0.036737399	-0.028629201	20	0	10.0006	65.6963	0
656	2.026	137.24	98.156	1.8378	-0.286	1759.435897	0.036755049	-0.028595201	20	0	10.0002	65.6961	0
657	2.026	137.35	98.187	1.8381	-0.2858	1760.923077	0.036762599	-0.028578801	20	0	9.9998	65.6961	0
658	2.0261	137.47	98.221	1.8386	-0.2856	1762.384615	0.036771449	-0.028560601	20	0	10.0006	65.696	0
659	2.0262	137.58	98.255	1.839	-0.2855	1763.871795	0.036780249	-0.028545601	20	0	10.001	65.6958	0
660	2.0263	137.71	98.287	1.8394	-0.2853	1765.564103	0.036787199	-0.028528201	20	0	10.001	65.6957	0
661	2.0264	137.83	98.321	1.8398	-0.2851	1767.025641	0.036795349	-0.028512601	20	0	10.0002	65.6956	0
662	2.0265	137.96	98.355	1.8402	-0.2849	1768.717949	0.036804199	-0.028493601	20	0	10.001	65.6954	0
663	2.0266	138.11	98.386	1.8406	-0.2848	1770.615385	0.036812399	-0.028477801	20	0	10.0006	65.6952	0
664	2.0266	138.26	98.42	1.8411	-0.2846	1772.512821	0.036821199	-0.028460401	20	0	10.0014	65.695	0
665	2.0268	138.49	98.486	1.8419	-0.2843	1775.461538	0.036838249	-0.028427401	20	0	9.9998	65.6943	0
666	2.0269	138.6	98.52	1.8424	-0.2841	1776.948718	0.036847049	-0.028411601	20	0	10.0006	65.6941	0
667	2.027	138.72	98.551	1.8427	-0.2839	1778.410256	0.036854599	-0.028394201	20	0	10.0002	65.6941	0
668	2.0271	138.86	98.587	1.8431	-0.2838	1780.307692	0.036861549	-0.028376201	20	0	9.9998	65.694	0
669	2.0272	138.98	98.62	1.8435	-0.2836	1781.794872	0.036870999	-0.028360401	20	0	9.9998	65.694	0
670	2.0273	139.13	98.651	1.8441	-0.2834	1783.692308	0.036881099	-0.028343001	20	0	9.9998	65.6941	0
671	2.0274	139.34	98.718	1.8447	-0.2831	1786.410256	0.036894949	-0.028309001	20	0	10.0002	65.6946	0
672	2.0275	139.47	98.752	1.8453	-0.2829	1788.102564	0.036906899	-0.028291801	20	0	9.9998	65.6947	0
673	2.0276	139.6	98.786	1.8455	-0.2828	1789.794872	0.036910049	-0.028275201	20	0	9.9993	65.695	0
674	2.0277	139.72	98.818	1.846	-0.2826	1791.25641	0.036920799	-0.028257801	20	0	9.9998	65.6952	0
675	2.0278	139.87	98.851	1.8465	-0.2824	1793.153846	0.036930849	-0.028241201	20	0	10.0002	65.6955	0
676	2.0279	139.98	98.886	1.8469	-0.2822	1794.641026	0.036937149	-0.028224801	20	0	10.0002	65.6957	0
677	2.028	140.1	98.918	1.8473	-0.2821	1796.128205	0.036946599	-0.028207401	20	0	10.0002	65.696	0
678	2.028	140.23	98.951	1.8478	-0.2819	1797.794872	0.036956699	-0.028190801	20	0	9.9998	65.696	0
679	2.0281	140.38	98.985	1.8481	-0.2817	1799.692308	0.036962999	-0.028172601	20	0	10.0002	65.6963	0
680	2.0283	140.61	99.052	1.8493	-0.2814	1802.641026	0.036985049	-0.028137201	20	0	10.0006	65.6962	0
681	2.0284	140.71	99.083	1.8495	-0.2812	1803.923077	0.036990749	-0.028121401	20	0	10.0006	65.6962	0
682	2.0285	140.85	99.118	1.85	-0.2811	1805.820513	0.037000199	-0.028105601	20	0	10.0002	65.696	0
683	2.0286	140.98	99.151	1.8504	-0.2809	1807.487179	0.037007099	-0.028088401	20	0	10.0002	65.696	0
684	2.0286	141.1	99.183	1.8508	-0.2807	1808.974359	0.037015949	-0.028071001	20	0	10.0002	65.696	0
685	2.0287	141.25	99.218	1.8514	-0.2805	1810.871795	0.037027299	-0.028053601	20	0	10.0006	65.6958	0
686	2.0288	141.36	99.249	1.8517	-0.2804	1812.333333	0.037033599	-0.028037801	20	0	10.001	65.6956	0
687	2.0289	141.49	99.283	1.8522	-0.2802	1814.025641	0.037044299	-0.028019801	20	0	10.001	65.6952	0
688	2.0291	141.72	99.349	1.8532	-0.2799	1816.974359	0.037063199	-0.027985801	20	0	10.001	65.6939	0
689	2.0292	141.86	99.382	1.8536	-0.2797	1818.666667	0.037071399	-0.027969201	20	0	10.0006	65.6935	0
690	2.0293	141.99	99.417	1.854	-0.2795	1820.358974	0.037079599	-0.027951201	20	0	10.0006	65.6931	0
691	2.0294	142.23	99.482	1.8548	-0.2792	1823.512821	0.037095999	-0.027916401	20	0	9.9993	65.6931	0
692	2.0295	142.35	99.514	1.8552	-0.279	1825	0.037104149	-0.027900601	20	0	9.9993	65.6933	0
693	2.0296	142.46	99.548	1.8557	-0.2788	1826.461538	0.037113599	-0.027882601	20	0	9.9998	65.6937	0
694	2.0297	142.6	99.582	1.8562	-0.2787	1828.153846	0.037124349	-0.027865201	20	0	9.9989	65.694	0
695	2.0298	142.73	99.614	1.8566	-0.2785	1829.846154	0.037132549	-0.027849401	20	0	9.9998	65.6944	0
696	2.0299	142.86	99.648	1.8571	-0.2783	1831.512821	0.037141349	-0.027832001	20	0	9.9993	65.6947	0
697	2.0299	142.99	99.682	1.8575	-0.2781	1833.205128	0.037149549	-0.027814001	20	0	9.9998	65.6951	0
698	2.0301	143.24	99.747	1.8584	-0.2778	1836.358974	0.037167199	-0.027780801	20	0	9.9998	65.696	0
699	2.0302	143.37	99.779	1.8587	-0.2776	1838.051282	0.037173499	-0.027763601	20	0	9.9998	65.6964	0
700	2.0304	143.62	99.846	1.8597	-0.2773	1841.230769	0.037193049	-0.027729601	20	0	9.9993	65.6968	0
701	2.0305	143.75	99.878	1.8601	-0.2771	1842.897436	0.037201199	-0.027711401	20	0	10.0002	65.6968	0
702	2.0306	143.98	99.946	1.8609	-0.2768	1845.846154	0.037218849	-0.027676801	20	0	10.001	65.6968	0
703	2.0307	144.11	99.978	1.8614	-0.2766	1847.538462	0.037227699	-0.027659401	20	0	10.0006	65.6968	0
704	2.0308	144.24	100.012	1.8619	-0.2764	1849.230769	0.037237749	-0.027642801	20	0	10.0002	65.6967	0
705	2.0309	144.35	100.043	1.8623	-0.2763	1850.692308	0.037245949	-0.027626401	20	0	10.0006	65.6966	0
706	2.031	144.47	100.077	1.8626	-0.2761	1852.179487	0.037252249	-0.027609001	20	0	10.0006	65.6964	0
707	2.0311	144.58	100.112	1.8632	-0.2759	1853.641026	0.037263599	-0.027592401	20	0	10.0006	65.6961	0
708	2.0312	144.75	100.145	1.8636	-0.2757	1855.769231	0.037271149	-0.027573401	20	0	10.0006	65.6957	0
709	2.0312	144.86	100.177	1.864	-0.2756	1857.230769	0.037279349	-0.027557801	20	0	10.001	65.6953	0
710	2.0313	144.98	100.211	1.8644	-0.2754	1858.717949	0.037288799	-0.027540401	20	0	10.001	65.6949	0
711	2.0314	145.09	100.242	1.8649	-0.2752	1860.179487	0.037297649	-0.027523001	20	0	10.0006	65.6945	0
712	2.0315	145.23	100.276	1.8653	-0.2751	1861.871795	0.037305849	-0.027505001	20	0	10.0002	65.6941	0
713	2.0316	145.36	100.308	1.8659	-0.2749	1863.564103	0.037317199	-0.027488401	20	0	10.001	65.6937	0
714	2.0317	145.49	100.342	1.8662	-0.2747	1865.25641	0.037324749	-0.027471001	20	0	10.0006	65.6931	0
715	2.0318	145.6	100.375	1.8666	-0.2745	1866.717949	0.037331049	-0.027452801	20	0	10.0006	65.6925	0
716	2.0319	145.74	100.407	1.8671	-0.2744	1868.410256	0.037342399	-0.027437001	20	0	10.0002	65.6923	0
717	2.0319	145.87	100.441	1.8675	-0.2742	1870.102564	0.037350599	-0.027419001	20	0	9.9998	65.6923	0
718	2.032	145.98	100.474	1.8679	-0.274	1871.564103	0.037358149	-0.027402401	20	0	10.0002	65.6924	0
719	2.0321	146.13	100.505	1.8684	-0.2739	1873.461538	0.037368849	-0.027385801	20	0	10.0002	65.6925	0
720	2.0323	146.36	100.572	1.8693	-0.2735	1876.410256	0.037385249	-0.027349601	20	0	9.9998	65.6934	0
721	2.0324	146.48	100.605	1.8697	-0.2733	1877.897436	0.037393449	-0.027333801	20	0	9.9993	65.6935	0
722	2.0325	146.64	100.638	1.8701	-0.2732	1880	0.037401599	-0.027315601	20	0	9.9993	65.6938	0
723	2.0326	146.85	100.704	1.8711	-0.2728	1882.74359	0.037421149	-0.027281001	20	0	10.0002	65.6942	0
724	2.0327	146.99	100.738	1.8715	-0.2726	1884.435897	0.037430599	-0.027261201	20	0	10.0006	65.6942	0
725	2.0328	147.12	100.769	1.8719	-0.2725	1886.102564	0.037438199	-0.027245601	20	0	10.0006	65.6943	0
726	2.0329	147.25	100.803	1.8725	-0.2723	1887.794872	0.037450149	-0.027229001	20	0	10.0002	65.6943	0
727	2.033	147.36	100.835	1.8729	-0.2721	1889.282051	0.037457699	-0.027211601	20	0	10.0002	65.6943	0
728	2.0332	147.61	100.903	1.8737	-0.2718	1892.435897	0.037474099	-0.027176201	20	0	10.001	65.6941	0
729	2.0332	147.72	100.933	1.8742	-0.2716	1893.897436	0.037483549	-0.027159601	20	0	10.0002	65.694	0
730	2.0333	147.84	100.967	1.8747	-0.2714	1895.384615	0.037493649	-0.027141401	20	0	9.9998	65.6938	0
731	2.0334	147.99	101.001	1.875	-0.2712	1897.282051	0.037499299	-0.027123401	20	0	10.0002	65.6937	0
732	2.0335	148.1	101.032	1.8755	-0.2711	1898.74359	0.037510649	-0.027106001	20	0	10.0006	65.6934	0
733	2.0336	148.23	101.066	1.8759	-0.2709	1900.435897	0.037518849	-0.027089401	20	0	10.001	65.693	0
734	2.0337	148.37	101.098	1.8764	-0.2707	1902.128205	0.037527049	-0.027072001	20	0	10.0006	65.6927	0
735	2.0338	148.48	101.131	1.8768	-0.2705	1903.615385	0.037535849	-0.027054001	20	0	10.0006	65.6927	0
736	2.0339	148.6	101.165	1.8772	-0.2704	1905.076923	0.037544699	-0.027036601	20	0	10.0002	65.6924	0
737	2.0339	148.73	101.197	1.8776	-0.2702	1906.769231	0.037552849	-0.027019201	20	0	10.0002	65.6921	0
738	2.034	148.84	101.23	1.8781	-0.27	1908.230769	0.037562349	-0.027001801	20	0	9.9998	65.6919	0
739	2.0341	148.96	101.264	1.8785	-0.2698	1909.717949	0.037570499	-0.026983001	20	0	9.9998	65.6919	0
740	2.0342	149.11	101.296	1.8791	-0.2697	1911.615385	0.037581249	-0.026966401	20	0	10.0006	65.6918	0
741	2.0343	149.24	101.329	1.8794	-0.2695	1913.307692	0.037588799	-0.026948201	20	0	9.9998	65.6918	0
742	2.0345	149.47	101.395	1.8803	-0.2691	1916.25641	0.037605799	-0.026914401	20	0	9.9998	65.6919	0
743	2.0345	149.62	101.429	1.8808	-0.269	1918.153846	0.037615899	-0.026896201	20	0	9.9998	65.6921	0
744	2.0346	149.75	101.46	1.8812	-0.2688	1919.820513	0.037623449	-0.026878801	20	0	9.9998	65.6923	0
745	2.0347	149.86	101.495	1.8817	-0.2686	1921.307692	0.037633549	-0.026860801	20	0	9.9993	65.6924	0
746	2.0348	149.99	101.528	1.8822	-0.2684	1923	0.037643599	-0.026842601	20	0	10.0006	65.6927	0
747	2.035	150.22	101.593	1.8831	-0.2681	1925.948718	0.037662549	-0.026808001	20	0	10.0006	65.6928	0
748	2.0352	150.47	101.659	1.884	-0.2677	1929.102564	0.037679549	-0.026774001	20	0	9.9998	65.6931	0
749	2.0352	150.6	101.692	1.8845	-0.2675	1930.794872	0.037690249	-0.026754401	20	0	10.0006	65.6931	0
750	2.0353	150.73	101.725	1.8848	-0.2674	1932.487179	0.037695949	-0.026740201	20	0	10.0006	65.6931	0
751	2.0354	150.86	101.758	1.8852	-0.2672	1934.153846	0.037704099	-0.026720401	20	0	10.0002	65.6931	0
752	2.0355	150.98	101.791	1.8857	-0.267	1935.641026	0.037713549	-0.026702201	20	0	10.0002	65.6931	0
753	2.0356	151.11	101.823	1.8861	-0.2669	1937.333333	0.037721149	-0.026685801	20	0	10.0006	65.6931	0
754	2.0357	151.23	101.856	1.8866	-0.2667	1938.794872	0.037731849	-0.026667601	20	0	9.9998	65.6931	0
755	2.0358	151.37	101.888	1.887	-0.2665	1940.692308	0.037739399	-0.026650201	20	0	10.0002	65.6931	0
756	2.0359	151.59	101.955	1.8879	-0.2661	1943.435897	0.037758299	-0.026614801	20	0	10.0006	65.6931	0
757	2.036	151.74	101.986	1.8883	-0.266	1945.333333	0.037766499	-0.026598201	20	0	10.0002	65.693	0
758	2.0361	151.85	102.02	1.8887	-0.2658	1946.820513	0.037774049	-0.026578601	20	0	10.0014	65.693	0
759	2.0362	152	102.053	1.8892	-0.2656	1948.692308	0.037784149	-0.026562001	20	0	9.9998	65.6927	0
760	2.0363	152.1	102.084	1.8896	-0.2655	1949.974359	0.037792999	-0.026545401	20	0	10.0006	65.6927	0
761	2.0364	152.25	102.118	1.8901	-0.2653	1951.871795	0.037801799	-0.026526401	20	0	10.0002	65.6925	0
762	2.0365	152.36	102.152	1.8906	-0.2651	1953.333333	0.037812499	-0.026508401	20	0	10.0002	65.6923	0
763	2.0365	152.48	102.183	1.891	-0.2649	1954.820513	0.037820099	-0.026492601	20	0	10.001	65.6921	0
764	2.0366	152.59	102.216	1.8913	-0.2647	1956.282051	0.037826999	-0.026474401	20	0	10.0006	65.6917	0
765	2.0367	152.74	102.247	1.8919	-0.2646	1958.179487	0.037837699	-0.026457001	20	0	10.0006	65.6914	0
766	2.0368	152.85	102.282	1.8924	-0.2644	1959.666667	0.037847149	-0.026439001	20	0	10.0006	65.6912	0
767	2.0369	152.99	102.315	1.8929	-0.2642	1961.358974	0.037857249	-0.026421601	20	0	9.9993	65.691	0
768	2.037	153.12	102.346	1.8932	-0.2641	1963.025641	0.037864199	-0.026405801	20	0	9.9998	65.691	0
769	2.0371	153.25	102.38	1.8937	-0.2639	1964.717949	0.037873649	-0.026387001	20	0	9.9998	65.6912	0
770	2.0372	153.48	102.446	1.8946	-0.2635	1967.666667	0.037891899	-0.026351401	20	0	9.9993	65.6914	0
771	2.0373	153.63	102.479	1.895	-0.2633	1969.564103	0.037900099	-0.026333401	20	0	10.0002	65.6914	0
772	2.0375	153.86	102.544	1.8959	-0.263	1972.512821	0.037917749	-0.026297801	20	0	10.0002	65.6918	0
773	2.0376	153.99	102.578	1.8963	-0.2628	1974.205128	0.037926599	-0.026279601	20	0	9.9998	65.6918	0
774	2.0377	154.1	102.609	1.8968	-0.2626	1975.692308	0.037935399	-0.026261601	20	0	9.9998	65.6922	0
775	2.0378	154.23	102.642	1.8972	-0.2624	1977.358974	0.037943599	-0.026244201	20	0	10.0002	65.6923	0
776	2.0378	154.38	102.673	1.8976	-0.2623	1979.25641	0.037951799	-0.026226801	20	0	10.0002	65.6926	0
777	2.038	154.61	102.741	1.8985	-0.2619	1982.205128	0.037970699	-0.026190601	20	0	10.0014	65.6928	0
778	2.0381	154.74	102.772	1.899	-0.2617	1983.897436	0.037980149	-0.026174001	20	0	9.9998	65.6929	0
779	2.0383	154.97	102.839	1.8999	-0.2614	1986.846154	0.037997799	-0.026137801	20	0	10.0006	65.693	0
780	2.0384	155.12	102.871	1.9004	-0.2612	1988.74359	0.038007899	-0.026119601	20	0	10.0002	65.693	0
781	2.0385	155.24	102.904	1.9009	-0.261	1990.230769	0.038017349	-0.026103001	20	0	10.0002	65.693	0
782	2.0385	155.37	102.936	1.9012	-0.2609	1991.897436	0.038024249	-0.026085001	20	0	10.0002	65.693	0
783	2.0387	155.62	103.002	1.9022	-0.2605	1995.076923	0.038044449	-0.026049401	20	0	10.0002	65.6929	0
784	2.0389	155.86	103.069	1.9032	-0.2601	1998.230769	0.038063349	-0.026012401	20	0	10.0006	65.6927	0
785	2.039	155.99	103.102	1.9035	-0.26	1999.923077	0.038070249	-0.025995001	20	0	10.0002	65.6926	0
786	2.0391	156.11	103.134	1.904	-0.2598	2001.384615	0.038079699	-0.025978601	20	0	10.0014	65.6924	0
787	2.0392	156.36	103.198	1.9049	-0.2594	2004.564103	0.038098599	-0.025943001	20	0	10.0006	65.6919	0
788	2.0393	156.5	103.232	1.9055	-0.2592	2006.461538	0.038109349	-0.025922601	20	0	10.0006	65.6915	0
789	2.0395	156.72	103.297	1.9062	-0.2589	2009.179487	0.038123849	-0.025889401	20	0	10.0002	65.6911	0
790	2.0396	156.85	103.33	1.9069	-0.2587	2010.871795	0.038137049	-0.025871201	20	0	10.001	65.6909	0
791	2.0397	156.96	103.364	1.9073	-0.2585	2012.358974	0.038145899	-0.025852401	20	0	9.9998	65.6907	0
792	2.0398	157.13	103.396	1.9077	-0.2583	2014.461538	0.038154699	-0.025832601	20	0	9.9998	65.6905	0
793	2.0398	157.24	103.428	1.9083	-0.2582	2015.948718	0.038165449	-0.025817601	20	0	9.9998	65.6903	0
794	2.0399	157.36	103.461	1.9086	-0.258	2017.410256	0.038172349	-0.025800401	20	0	10.0002	65.6903	0
795	2.04	157.49	103.494	1.9091	-0.2578	2019.102564	0.038181199	-0.025780601	20	0	9.9993	65.6902	0
796	2.0401	157.62	103.528	1.9095	-0.2576	2020.794872	0.038190649	-0.025762401	20	0	10.0002	65.6902	0
797	2.0402	157.74	103.559	1.91	-0.2575	2022.25641	0.038200099	-0.025746001	20	0	9.9998	65.6903	0
798	2.0403	157.85	103.593	1.9104	-0.2573	2023.74359	0.038208299	-0.025727001	20	0	9.9998	65.6905	0
799	2.0404	158	103.626	1.9109	-0.2571	2025.641026	0.038217099	-0.025708801	20	0	10.0002	65.6908	0
800	2.0405	158.25	103.692	1.9117	-0.2567	2028.794872	0.038234099	-0.025673401	20	0	9.9993	65.6911	0
801	2.0406	158.36	103.725	1.9122	-0.2566	2030.25641	0.038244199	-0.025656801	20	0	9.9998	65.6913	0
802	2.0407	158.48	103.756	1.9126	-0.2564	2031.74359	0.038252999	-0.025638801	20	0	10.0002	65.6917	0
803	2.0408	158.61	103.79	1.9131	-0.2562	2033.435897	0.038261849	-0.025618201	20	0	9.9998	65.6917	0
804	2.0409	158.72	103.821	1.9134	-0.256	2034.897436	0.038268799	-0.025602401	20	0	9.9998	65.6917	0
805	2.041	158.85	103.854	1.9139	-0.2558	2036.589744	0.038278849	-0.025584201	20	0	10.0002	65.692	0
806	2.0411	158.99	103.888	1.9144	-0.2556	2038.282051	0.038287699	-0.025564601	20	0	9.9998	65.692	0
807	2.0412	159.22	103.953	1.9154	-0.2553	2041.230769	0.038307199	-0.025529201	20	0	10.0006	65.6923	0
808	2.0413	159.33	103.985	1.9157	-0.2551	2042.692308	0.038314799	-0.025511801	20	0	10.0002	65.6924	0
809	2.0414	159.5	104.019	1.9163	-0.2549	2044.820513	0.038326749	-0.025492801	20	0	10.0002	65.6924	0
810	2.0415	159.61	104.053	1.9167	-0.2547	2046.282051	0.038334949	-0.025474801	20	0	10.0002	65.6924	0
811	2.0416	159.74	104.084	1.9171	-0.2546	2047.974359	0.038342499	-0.025457401	20	0	10.001	65.6923	0
812	2.0417	159.87	104.117	1.9176	-0.2544	2049.666667	0.038351349	-0.025436801	20	0	10.0002	65.6923	0
813	2.0418	160.1	104.181	1.9185	-0.254	2052.615385	0.038369599	-0.025403001	20	0	10.001	65.6926	0
814	2.0419	160.23	104.215	1.9189	-0.2538	2054.282051	0.038378449	-0.025384801	20	0	9.9998	65.6929	0
815	2.042	160.35	104.246	1.9194	-0.2537	2055.769231	0.038387899	-0.025368201	20	0	10.0002	65.6929	0
816	2.0421	160.5	104.279	1.9199	-0.2535	2057.666667	0.038398599	-0.025348601	20	0	10.0006	65.693	0
817	2.0423	160.73	104.345	1.9209	-0.2531	2060.615385	0.038417499	-0.025313001	20	0	10.001	65.6929	0
818	2.0424	160.88	104.378	1.9213	-0.253	2062.512821	0.038426949	-0.025295001	20	0	10.0002	65.6928	0
819	2.0425	161.09	104.442	1.9224	-0.2526	2065.25641	0.038447099	-0.025257201	20	0	10.0006	65.6926	0
820	2.0426	161.24	104.476	1.9227	-0.2524	2067.153846	0.038454699	-0.025240601	20	0	10.0002	65.6924	0
821	2.0427	161.37	104.508	1.9232	-0.2522	2068.846154	0.038464749	-0.025222401	20	0	10.0006	65.6922	0
822	2.0429	161.6	104.575	1.9241	-0.2519	2071.794872	0.038482399	-0.025185401	20	0	10.0002	65.6917	0
823	2.043	161.73	104.606	1.9246	-0.2517	2073.461538	0.038491249	-0.025168801	20	0	10.0006	65.6915	0
824	2.0431	161.85	104.64	1.925	-0.2515	2074.948718	0.038500699	-0.025149001	20	0	10.0006	65.6911	0
825	2.0431	161.99	104.673	1.9255	-0.2513	2076.846154	0.038510149	-0.025131001	20	0	10.0006	65.6907	0
826	2.0432	162.13	104.704	1.926	-0.2511	2078.538462	0.038519599	-0.025113601	20	0	10.0002	65.6904	0
827	2.0434	162.37	104.77	1.9269	-0.2508	2081.692308	0.038537849	-0.025078201	20	0	10.0006	65.6899	0
828	2.0435	162.49	104.803	1.9273	-0.2506	2083.179487	0.038546699	-0.025060001	20	0	9.9998	65.6896	0
829	2.0436	162.6	104.837	1.9278	-0.2504	2084.641026	0.038555499	-0.025041801	20	0	9.9998	65.6895	0
830	2.0437	162.75	104.868	1.9282	-0.2502	2086.538462	0.038564949	-0.025024601	20	0	9.9998	65.6896	0
831	2.0438	162.98	104.935	1.9292	-0.2499	2089.487179	0.038583249	-0.024986601	20	0	9.9998	65.69	0
832	2.0439	163.1	104.967	1.9296	-0.2497	2090.974359	0.038592699	-0.024967801	20	0	9.9998	65.6902	0
833	2.044	163.24	105.001	1.9301	-0.2495	2092.871795	0.038602149	-0.024949601	20	0	9.9989	65.6904	0
834	2.0441	163.36	105.031	1.9305	-0.2493	2094.333333	0.038609699	-0.024933001	20	0	9.9993	65.6908	0
835	2.0442	163.49	105.064	1.931	-0.2492	2096.025641	0.038620449	-0.024915001	20	0	10.0006	65.6909	0
836	2.0443	163.6	105.097	1.9315	-0.249	2097.487179	0.038630499	-0.024896001	20	0	10.0002	65.6912	0
837	2.0444	163.72	105.129	1.9319	-0.2488	2098.974359	0.038638699	-0.024877801	20	0	9.9998	65.6913	0
838	2.0444	163.85	105.162	1.9323	-0.2486	2100.666667	0.038646899	-0.024859801	20	0	10.0006	65.6918	0
839	2.0445	163.98	105.196	1.9328	-0.2484	2102.358974	0.038656349	-0.024840801	20	0	10.0002	65.6918	0
840	2.0446	164.11	105.227	1.9333	-0.2482	2104.025641	0.038666449	-0.024823401	20	0	10.0006	65.6918	0
841	2.0447	164.25	105.26	1.9337	-0.2481	2105.717949	0.038673349	-0.024805401	20	0	10.0002	65.6918	0
842	2.0449	164.48	105.326	1.9345	-0.2477	2108.666667	0.038690399	-0.024768201	20	0	10.001	65.6917	0
843	2.045	164.59	105.359	1.9351	-0.2475	2110.153846	0.038701099	-0.024749401	20	0	10.0006	65.6915	0
844	2.0451	164.72	105.39	1.9355	-0.2473	2111.820513	0.038710549	-0.024733601	20	0	10.0002	65.6914	0
845	2.0451	164.85	105.424	1.936	-0.2471	2113.512821	0.038719349	-0.024713001	20	0	10.001	65.6911	0
846	2.0452	164.99	105.457	1.9364	-0.247	2115.205128	0.038728799	-0.024695801	20	0	10.0006	65.6908	0
847	2.0453	165.12	105.488	1.937	-0.2468	2116.897436	0.038739549	-0.024676801	20	0	9.9998	65.6905	0
848	2.0455	165.35	105.554	1.9378	-0.2464	2119.846154	0.038756549	-0.024643801	20	0	10.001	65.6898	0
849	2.0456	165.5	105.586	1.9383	-0.2462	2121.74359	0.038765999	-0.024622401	20	0	10.001	65.6894	0
850	2.0457	165.74	105.652	1.9392	-0.2459	2124.897436	0.038783649	-0.024587001	20	0	10.0006	65.689	0
851	2.0459	165.97	105.718	1.9403	-0.2455	2127.846154	0.038805099	-0.024549001	20	0	9.9998	65.6889	0
852	2.046	166.1	105.75	1.9405	-0.2453	2129.538462	0.038810099	-0.024531801	20	0	9.9998	65.689	0
853	2.0461	166.24	105.784	1.9412	-0.2451	2131.230769	0.038823349	-0.024514401	20	0	9.9998	65.6892	0
854	2.0462	166.35	105.814	1.9417	-0.2449	2132.692308	0.038833449	-0.024494601	20	0	9.9993	65.6894	0
855	2.0463	166.47	105.848	1.9422	-0.2448	2134.179487	0.038843499	-0.024476601	20	0	9.9998	65.6895	0
856	2.0464	166.6	105.882	1.9426	-0.2446	2135.846154	0.038852349	-0.024456801	20	0	10.0002	65.6897	0
857	2.0464	166.73	105.913	1.9432	-0.2444	2137.538462	0.038863049	-0.024441001	20	0	10.001	65.6899	0
858	2.0465	166.86	105.947	1.9435	-0.2442	2139.230769	0.038869999	-0.024423001	20	0	9.9998	65.69	0
859	2.0466	166.99	105.98	1.944	-0.244	2140.923077	0.038880699	-0.024404801	20	0	10.0002	65.6901	0
860	2.0467	167.12	106.011	1.9445	-0.2439	2142.589744	0.038890799	-0.024389001	20	0	10.0002	65.6905	0
861	2.0468	167.24	106.044	1.9449	-0.2437	2144.076923	0.038897699	-0.024370201	20	0	10.0002	65.6904	0
862	2.0469	167.35	106.075	1.9453	-0.2435	2145.564103	0.038906549	-0.024353601	20	0	10.0006	65.6904	0
863	2.047	167.48	106.108	1.9458	-0.2433	2147.230769	0.038915349	-0.024333801	20	0	10.0006	65.6905	0
864	2.047	167.6	106.142	1.9463	-0.2432	2148.717949	0.038926699	-0.024315801	20	0	10.0002	65.6905	0
865	2.0471	167.73	106.174	1.9467	-0.243	2150.410256	0.038934249	-0.024300801	20	0	10.0002	65.6905	0
866	2.0472	167.85	106.206	1.9471	-0.2428	2151.871795	0.038941199	-0.024282601	20	0	9.9998	65.6905	0
867	2.0473	167.98	106.239	1.9478	-0.2426	2153.564103	0.038955049	-0.024264401	20	0	10.0006	65.6906	0
868	2.0474	168.11	106.271	1.9481	-0.2425	2155.25641	0.038961349	-0.024248001	20	0	9.9998	65.6908	0
869	2.0475	168.22	106.305	1.9485	-0.2423	2156.717949	0.038970799	-0.024229801	20	0	10.0002	65.6908	0
870	2.0476	168.34	106.337	1.949	-0.2421	2158.205128	0.038980899	-0.024210001	20	0	10.001	65.6908	0
871	2.0477	168.47	106.368	1.9495	-0.242	2159.871795	0.038989099	-0.024195001	20	0	9.9998	65.6908	0
872	2.0477	168.62	106.402	1.9499	-0.2418	2161.769231	0.038998549	-0.024176201	20	0	10.0002	65.6908	0
873	2.0478	168.75	106.433	1.9503	-0.2416	2163.461538	0.039006099	-0.024158801	20	0	10.0006	65.6908	0
874	2.0479	168.87	106.466	1.9507	-0.2414	2164.948718	0.039014949	-0.024142201	20	0	10.0002	65.6908	0
875	2.048	169	106.5	1.9513	-0.2412	2166.615385	0.039025649	-0.024123401	20	0	10.0006	65.6908	0
876	2.0481	169.11	106.531	1.9517	-0.2411	2168.102564	0.039034449	-0.024107601	20	0	9.9998	65.6907	0
877	2.0482	169.24	106.563	1.9522	-0.2409	2169.794872	0.039044549	-0.024088601	20	0	9.9998	65.6907	0
878	2.0484	169.47	106.629	1.9531	-0.2405	2172.74359	0.039062849	-0.024053201	20	0	10.0002	65.6904	0
879	2.0484	169.62	106.662	1.9536	-0.2404	2174.641026	0.039071649	-0.024035801	20	0	10.0002	65.6902	0
880	2.0486	169.87	106.726	1.9545	-0.24	2177.794872	0.039089949	-0.024001201	20	0	10.0006	65.6897	0
881	2.0488	170.08	106.791	1.9554	-0.2397	2180.538462	0.039108849	-0.023966401	20	0	10.001	65.689	0
882	2.0489	170.23	106.825	1.9558	-0.2395	2182.435897	0.039116999	-0.023947601	20	0	10.0006	65.6884	0
883	2.049	170.36	106.856	1.9563	-0.2393	2184.128205	0.039126499	-0.023931001	20	0	9.9998	65.688	0
884	2.049	170.51	106.889	1.9568	-0.2391	2186.025641	0.039136549	-0.023911201	20	0	9.9998	65.688	0
885	2.0492	170.74	106.954	1.9578	-0.2388	2188.974359	0.039155449	-0.023878201	20	0	9.9998	65.6881	0
886	2.0494	170.97	107.02	1.9587	-0.2384	2191.923077	0.039174999	-0.023841001	20	0	10.0002	65.6886	0
887	2.0495	171.12	107.052	1.9592	-0.2382	2193.820513	0.039184449	-0.023824601	20	0	9.9993	65.6889	0
888	2.0497	171.35	107.117	1.96	-0.2379	2196.769231	0.039200199	-0.023790601	20	0	9.9998	65.6897	0
889	2.0497	171.5	107.151	1.9607	-0.2377	2198.666667	0.039213449	-0.023771801	20	0	10.0002	65.69	0
890	2.0498	171.61	107.184	1.9611	-0.2375	2200.128205	0.039222249	-0.023753601	20	0	9.9998	65.6903	0
891	2.0499	171.73	107.215	1.9614	-0.2374	2201.615385	0.039227949	-0.023735401	20	0	9.9998	65.6906	0
892	2.05	171.87	107.248	1.9621	-0.2372	2203.512821	0.039241149	-0.023717401	20	0	10.0002	65.6909	0
893	2.0501	171.99	107.282	1.9625	-0.237	2204.974359	0.039249349	-0.023699201	20	0	9.9998	65.6912	0
894	2.0502	172.12	107.313	1.9629	-0.2368	2206.666667	0.039257549	-0.023681801	20	0	10.0002	65.6915	0
895	2.0503	172.25	107.346	1.9635	-0.2366	2208.358974	0.039270149	-0.023663601	20	0	10.0006	65.6915	0
896	2.0503	172.37	107.377	1.9638	-0.2364	2209.820513	0.039275849	-0.023644001	20	0	10.0002	65.6918	0
897	2.0505	172.6	107.443	1.9647	-0.2361	2212.794872	0.039294749	-0.023609201	20	0	10.001	65.6921	0
898	2.0506	172.75	107.475	1.9652	-0.2359	2214.692308	0.039304799	-0.023590401	20	0	10.0002	65.692	0
899	2.0507	172.86	107.508	1.9658	-0.2357	2216.153846	0.039316799	-0.023572201	20	0	9.9998	65.692	0
900	2.0508	172.99	107.541	1.9662	-0.2356	2217.846154	0.039324999	-0.023555601	20	0	10.0006	65.6919	0
901	2.0509	173.11	107.572	1.9667	-0.2354	2219.307692	0.039333799	-0.023538401	20	0	9.9998	65.6917	0
902	2.051	173.22	107.605	1.9672	-0.2352	2220.794872	0.039343899	-0.023518601	20	0	10.001	65.6915	0
903	2.051	173.34	107.637	1.9677	-0.235	2222.25641	0.039353999	-0.023502801	20	0	9.9993	65.6914	0
904	2.0511	173.47	107.671	1.9681	-0.2348	2223.948718	0.039362149	-0.023484801	20	0	10.0006	65.6913	0
905	2.0512	173.63	107.704	1.9687	-0.2347	2226.051282	0.039374799	-0.023465801	20	0	10.001	65.6909	0
906	2.0514	173.86	107.768	1.9696	-0.2343	2229	0.039391149	-0.023428001	20	0	10.001	65.6904	0
907	2.0515	173.99	107.802	1.97	-0.2341	2230.692308	0.039400599	-0.023410601	20	0	10.0006	65.69	0
908	2.0516	174.11	107.833	1.9704	-0.2339	2232.179487	0.039408799	-0.023393201	20	0	10.0014	65.6896	0
909	2.0516	174.22	107.867	1.971	-0.2337	2233.641026	0.039420149	-0.023373601	20	0	10.0006	65.6889	0
910	2.0517	174.34	107.898	1.9715	-0.2336	2235.128205	0.039430249	-0.023355401	20	0	10.0006	65.6883	0
911	2.0518	174.5	107.932	1.972	-0.2333	2237.230769	0.039439049	-0.023334201	20	0	10.001	65.6879	0
912	2.052	174.72	107.995	1.9729	-0.233	2239.974359	0.039458599	-0.023301801	20	0	10.0002	65.6872	0
913	2.0521	174.83	108.027	1.9732	-0.2328	2241.435897	0.039464899	-0.023282001	20	0	9.9998	65.6872	0
914	2.0523	174.93	108.065	1.974	-0.2325	2242.717949	0.039479399	-0.023252201	20	0	9.9998	65.6874	0
915	2.0526	175.06	108.123	1.9749	-0.232	2244.384615	0.039498949	-0.023202401	20	0	9.9998	65.689	0
916	2.0529	175.21	108.172	1.9758	-0.2317	2246.282051	0.039515949	-0.023167801	20	0	9.9998	65.6903	0
917	2.0531	175.39	108.228	1.9766	-0.2313	2248.615385	0.039531699	-0.023133001	20	0	10.001	65.6916	0
918	2.0533	175.56	108.273	1.9772	-0.2311	2250.717949	0.039544299	-0.023107001	20	0	10.0002	65.6917	0
919	2.0535	175.74	108.322	1.9779	-0.2308	2253.025641	0.039558799	-0.023079401	20	0	9.9998	65.6917	0
920	2.0536	175.84	108.349	1.9783	-0.2306	2254.307692	0.039565749	-0.023063801	20	0	9.9998	65.6918	0
921	2.0537	176.07	108.405	1.9789	-0.2303	2257.25641	0.039578349	-0.023033801	20	0	10.0006	65.6917	0
922	2.0538	176.2	108.435	1.9794	-0.2302	2258.948718	0.039587149	-0.023018001	20	0	10.0006	65.6915	0
923	2.0539	176.33	108.467	1.98	-0.23	2260.615385	0.039599149	-0.023000601	20	0	10.0002	65.6914	0
924	2.054	176.46	108.5	1.9802	-0.2298	2262.307692	0.039604149	-0.022983201	20	0	9.9998	65.6912	0
925	2.0541	176.59	108.533	1.9808	-0.2297	2264	0.039615499	-0.022966001	20	0	10.0006	65.6911	0
926	2.0542	176.77	108.57	1.9813	-0.2295	2266.307692	0.039626849	-0.022948601	20	0	10.0006	65.6911	0
927	2.0543	176.94	108.608	1.9818	-0.2293	2268.435897	0.039635699	-0.022928801	20	0	10.0006	65.6908	0
928	2.0543	177.08	108.644	1.9823	-0.2291	2270.307692	0.039645749	-0.022908401	20	0	10.0006	65.6906	0
929	2.0544	177.28	108.685	1.9829	-0.2289	2272.846154	0.039657749	-0.022887001	20	0	10.0006	65.6903	0
930	2.0545	177.41	108.725	1.9833	-0.2287	2274.538462	0.039665949	-0.022869001	20	0	10.0014	65.6901	0
931	2.0546	177.61	108.768	1.9841	-0.2285	2277.076923	0.039681049	-0.022846801	20	0	10.001	65.6898	0
932	2.0547	177.82	108.814	1.9847	-0.2282	2279.794872	0.039693049	-0.022823201	20	0	10.0002	65.6895	0
933	2.0548	178.01	108.858	1.9852	-0.228	2282.128205	0.039704349	-0.022800401	20	0	10.001	65.6893	0
934	2.0549	178.19	108.906	1.986	-0.2278	2284.435897	0.039719499	-0.022776801	20	0	10.0002	65.6888	0
935	2.0549	178.42	108.951	1.9866	-0.2275	2287.384615	0.039731449	-0.022752201	20	0	10.001	65.6886	0
936	2.055	178.61	109.002	1.9872	-0.2273	2289.923077	0.039744049	-0.022728601	20	0	10.0002	65.6883	0
937	2.0551	178.86	109.054	1.9881	-0.227	2293.076923	0.039761099	-0.022701801	20	0	10.0006	65.688	0
938	2.0552	179.07	109.105	1.9887	-0.2268	2295.820513	0.039773699	-0.022676601	20	0	10.0006	65.6878	0
939	2.0553	179.32	109.16	1.9895	-0.2265	2298.974359	0.039790699	-0.022646601	20	0	10.0006	65.6876	0
940	2.0554	179.57	109.217	1.9903	-0.2262	2302.153846	0.039806449	-0.022619001	20	0	10.0006	65.6874	0
941	2.0555	179.8	109.271	1.9911	-0.2259	2305.102564	0.039822199	-0.022590601	20	0	10.0006	65.6873	0
942	2.0556	180.04	109.331	1.9919	-0.2256	2308.25641	0.039837949	-0.022562201	20	0	10.001	65.6871	0
943	2.0556	180.29	109.388	1.9927	-0.2253	2311.410256	0.039853749	-0.022532401	20	0	10.0006	65.6869	0
944	2.0557	180.57	109.451	1.9936	-0.225	2315	0.039871999	-0.022499201	20	0	9.9998	65.6867	0
945	2.0558	180.85	109.515	1.9946	-0.2247	2318.589744	0.039892149	-0.022466801	20	0	10.001	65.6866	0
946	2.0559	181.13	109.576	1.9954	-0.2243	2322.179487	0.039907299	-0.022434601	20	0	10.0002	65.6865	0
947	2.056	181.41	109.644	1.9963	-0.224	2325.74359	0.039925549	-0.022400601	20	0	9.9993	65.6866	0
948	2.0561	181.72	109.713	1.9973	-0.2237	2329.74359	0.039945099	-0.022365201	20	0	10.0002	65.6867	0
949	2.0562	181.98	109.78	1.9982	-0.2233	2333.128205	0.039963399	-0.022332001	20	0	10.0002	65.6869	0
950	2.0563	182.31	109.853	1.9992	-0.2229	2337.333333	0.039984799	-0.022294201	20	0	9.9998	65.6869	0
951	2.0563	182.61	109.926	2.0003	-0.2226	2341.128205	0.040005599	-0.022256401	20	0	10.0002	65.6869	0
952	2.0564	182.92	109.997	2.0012	-0.2222	2345.128205	0.040023899	-0.022217801	20	0	9.9993	65.6869	0
953	2.0565	183.23	110.072	2.0023	-0.2218	2349.153846	0.040046549	-0.022177601	20	0	10.0002	65.687	0
954	2.0566	183.56	110.146	2.0033	-0.2214	2353.358974	0.040066099	-0.022140401	20	0	9.9998	65.687	0
955	2.0567	183.89	110.225	2.0044	-0.221	2357.564103	0.040087549	-0.022097001	20	0	10.0002	65.687	0
956	2.0568	184.24	110.306	2.0055	-0.2206	2362	0.040110199	-0.022055401	20	0	10.001	65.6869	0
957	2.0569	184.56	110.383	2.0065	-0.2201	2366.205128	0.040129099	-0.022012801	20	0	10.0006	65.6868	0
958	2.0569	184.91	110.467	2.0078	-0.2197	2370.641026	0.040155599	-0.021968601	20	0	10.0006	65.6866	0
959	2.057	185.27	110.553	2.009	-0.2192	2375.282051	0.040179549	-0.021922001	20	0	10.0006	65.6864	0
960	2.0571	185.65	110.635	2.01	-0.2188	2380.128205	0.040200949	-0.021877201	20	0	10.0006	65.6862	0
961	2.0572	185.99	110.723	2.0113	-0.2183	2384.538462	0.040226149	-0.021829001	20	0	10.001	65.6858	0
962	2.0573	186.36	110.807	2.0127	-0.2178	2389.179487	0.040253249	-0.021781801	20	0	10.0006	65.6856	0
963	2.0574	186.75	110.899	2.014	-0.2173	2394.25641	0.040280999	-0.021734401	20	0	9.9998	65.6856	0
964	2.0575	187.15	110.992	2.0155	-0.2168	2399.307692	0.040309349	-0.021681601	20	0	10.0002	65.6857	0
965	2.0576	187.51	111.081	2.0169	-0.2163	2403.948718	0.040338349	-0.021631201	20	0	9.9998	65.6858	0
966	2.0576	187.92	111.176	2.0182	-0.2158	2409.205128	0.040364799	-0.021579001	20	0	9.9998	65.6858	0
967	2.0577	188.35	111.272	2.0199	-0.2153	2414.692308	0.040397599	-0.021526201	20	0	10.0002	65.6862	0
968	2.0578	188.74	111.364	2.0211	-0.2147	2419.74359	0.040422799	-0.021473401	20	0	10.0002	65.6862	0
969	2.0579	189.15	111.465	2.0225	-0.2142	2425.025641	0.040449899	-0.021418201	20	0	9.9998	65.6861	0
970	2.058	189.55	111.56	2.0239	-0.2136	2430.076923	0.040478249	-0.021363801	20	0	10.0002	65.6861	0
971	2.0581	189.97	111.663	2.0253	-0.213	2435.564103	0.040506599	-0.021304801	20	0	10.001	65.6861	0
972	2.0582	190.42	111.768	2.0267	-0.2125	2441.25641	0.040534949	-0.021247201	20	0	10.0002	65.6861	0
973	2.0582	190.83	111.867	2.0283	-0.2119	2446.512821	0.040566499	-0.021190401	20	0	10.001	65.6859	0
974	2.0583	191.27	111.975	2.0298	-0.2113	2452.205128	0.040596749	-0.021129001	20	0	10.0006	65.6858	0
975	2.0584	191.72	112.084	2.0313	-0.2107	2457.897436	0.040626999	-0.021066601	20	0	10.0002	65.6856	0
976	2.0585	192.14	112.187	2.033	-0.2101	2463.384615	0.040659099	-0.021008201	20	0	10.0006	65.6854	0
977	2.0586	192.59	112.298	2.0345	-0.2094	2469.076923	0.040689999	-0.020944401	20	0	10.0002	65.6851	0
978	2.0587	193.08	112.411	2.0362	-0.2088	2475.384615	0.040724649	-0.020879001	20	0	10.0006	65.685	0
979	2.0588	193.51	112.519	2.0379	-0.2082	2480.871795	0.040758699	-0.020817401	20	0	9.9998	65.6847	0
980	2.0589	194.02	112.634	2.0395	-0.2075	2487.410256	0.040790199	-0.020750401	20	0	10.0002	65.6847	0
981	2.0589	194.44	112.744	2.0414	-0.2069	2492.871795	0.040827999	-0.020686601	20	0	9.9998	65.6847	0
982	2.059	194.9	112.863	2.0432	-0.2062	2498.769231	0.040863299	-0.020618001	20	0	9.9998	65.6847	0
983	2.0591	195.41	112.983	2.045	-0.2055	2505.307692	0.040899849	-0.020546201	20	0	10.0006	65.6847	0
984	2.0592	195.91	113.097	2.0468	-0.2048	2511.641026	0.040935149	-0.020479201	20	0	9.9998	65.6846	0
985	2.0593	196.42	113.22	2.0485	-0.2041	2518.179487	0.040969199	-0.020407401	20	0	10.001	65.6846	0
986	2.0594	196.89	113.335	2.0503	-0.2034	2524.282051	0.041006999	-0.020337401	20	0	10.0006	65.6844	0
987	2.0595	197.39	113.461	2.0522	-0.2026	2530.615385	0.041044149	-0.020263201	20	0	10.0006	65.6844	0
988	2.0595	197.9	113.588	2.0541	-0.2019	2537.128205	0.041081999	-0.020186001	20	0	9.9998	65.6843	0
989	2.0596	198.41	113.707	2.0561	-0.2012	2543.666667	0.041122949	-0.020115001	20	0	10.001	65.6843	0
990	2.0597	198.9	113.835	2.0581	-0.2004	2550	0.041161399	-0.020037001	20	0	9.9993	65.6843	0
991	2.0598	199.44	113.966	2.0599	-0.1996	2556.948718	0.041197299	-0.019957401	20	0	10.0002	65.6843	0
992	2.0599	199.97	114.088	2.062	-0.1988	2563.692308	0.041239549	-0.019881601	20	0	10.001	65.6841	0
993	2.06	200.49	114.221	2.0638	-0.198	2570.435897	0.041276699	-0.019802801	20	0	10.0002	65.6839	0
994	2.0601	201.07	114.356	2.0659	-0.1972	2577.820513	0.041318299	-0.019720801	20	0	10.0006	65.6838	0
995	2.0602	201.56	114.482	2.0679	-0.1964	2584.128205	0.041357999	-0.019642001	20	0	9.9993	65.6837	0
996	2.0602	202.12	114.618	2.07	-0.1956	2591.307692	0.041399599	-0.019559201	20	0	9.9998	65.6837	0
997	2.0603	202.61	114.747	2.072	-0.1948	2597.615385	0.041439299	-0.019478801	20	0	9.9993	65.6837	0
998	2.0604	203.21	114.886	2.0742	-0.1939	2605.205128	0.041484049	-0.019392801	20	0	9.9993	65.6837	0
999	2.0605	203.75	115.024	2.0764	-0.1931	2612.179487	0.041528799	-0.019307601	20	0	9.9993	65.684	0
1000	2.0606	204.28	115.157	2.0786	-0.1922	2618.923077	0.041571649	-0.019224801	20	0	9.9998	65.6841	0
1001	2.0607	204.9	115.299	2.0808	-0.1914	2626.923077	0.041616999	-0.019137401	20	0	10.0006	65.6841	0
1002	2.0608	205.39	115.433	2.0829	-0.1905	2633.25641	0.041657349	-0.019053001	20	0	10.0006	65.684	0
1003	2.0609	205.98	115.577	2.085	-0.1896	2640.820513	0.041700199	-0.018962401	20	0	10.001	65.6838	0
1004	2.0609	206.59	115.722	2.0872	-0.1887	2648.641026	0.041744299	-0.018870801	20	0	10.0006	65.6836	0
1005	2.061	207.14	115.859	2.0894	-0.1878	2655.589744	0.041787799	-0.018783401	20	0	10.001	65.6834	0
1006	2.0611	207.73	116.006	2.0919	-0.1869	2663.179487	0.041837599	-0.018688801	20	0	10.0006	65.6829	0
1007	2.0612	208.3	116.153	2.0942	-0.186	2670.538462	0.041884249	-0.018595601	20	0	10.0006	65.6827	0
1008	2.0613	208.88	116.293	2.0963	-0.1851	2677.923077	0.041926449	-0.018506601	20	0	10.0006	65.6825	0
1009	2.0614	209.5	116.443	2.0987	-0.1841	2685.923077	0.041974349	-0.018410401	20	0	9.9998	65.6825	0
1010	2.0615	210.06	116.584	2.1008	-0.1832	2693.102564	0.042016549	-0.018319801	20	0	9.9998	65.6827	0
1011	2.0615	210.69	116.737	2.1033	-0.1822	2701.102564	0.042065099	-0.018224401	20	0	10.0002	65.6828	0
1012	2.0616	211.26	116.889	2.1056	-0.1812	2708.487179	0.042112999	-0.018122601	20	0	10.0006	65.6832	0
1013	2.0617	211.87	117.035	2.1078	-0.1803	2716.282051	0.042155849	-0.018029601	20	0	9.9998	65.6832	0
1014	2.0618	212.48	117.189	2.1103	-0.1793	2724.076923	0.042205649	-0.017928001	20	0	9.9998	65.6832	0
1015	2.0619	213.1	117.345	2.1128	-0.1783	2732.076923	0.042256049	-0.017831001	20	0	10.0006	65.6833	0
1016	2.062	213.69	117.492	2.1152	-0.1774	2739.666667	0.042303949	-0.017737801	20	0	10.0002	65.6833	0
1017	2.0621	214.32	117.649	2.118	-0.1764	2747.692308	0.042360049	-0.017637001	20	0	10.0014	65.6832	0
1018	2.0622	214.91	117.799	2.1205	-0.1754	2755.282051	0.042409199	-0.017544001	20	0	10.0014	65.6829	0
1019	2.0622	215.57	117.957	2.1227	-0.1744	2763.692308	0.042453299	-0.017443001	20	0	10.0006	65.6825	0
1020	2.0623	216.21	118.117	2.1252	-0.1734	2771.923077	0.042503699	-0.017339801	20	0	10.0006	65.6821	0
1021	2.0624	216.79	118.268	2.1276	-0.1725	2779.307692	0.042552849	-0.017245201	20	0	10.0006	65.6818	0
1022	2.0625	217.46	118.43	2.1304	-0.1714	2787.948718	0.042607049	-0.017141001	20	0	9.9998	65.6816	0
1023	2.0626	218.08	118.592	2.1331	-0.1704	2795.948718	0.042661249	-0.017037801	20	0	10.0006	65.6816	0
1024	2.0627	218.71	118.744	2.1357	-0.1694	2803.948718	0.042714199	-0.016939201	20	0	10.0002	65.6817	0
1025	2.0628	219.33	118.908	2.1384	-0.1683	2811.974359	0.042767149	-0.016834401	20	0	9.9989	65.6817	0
1026	2.0628	219.94	119.062	2.1407	-0.1673	2819.769231	0.042814399	-0.016734201	20	0	10.0002	65.6818	0
1027	2.0629	220.62	119.228	2.1434	-0.1663	2828.410256	0.042868599	-0.016627001	20	0	10.0006	65.6819	0
1028	2.063	221.24	119.393	2.1461	-0.1652	2836.410256	0.042922799	-0.016519001	20	0	10.001	65.6817	0
1029	2.0631	221.88	119.549	2.1487	-0.1642	2844.641026	0.042974449	-0.016416401	20	0	10.0006	65.6814	0
1030	2.0632	222.57	119.716	2.1517	-0.1631	2853.487179	0.043033099	-0.016307601	20	0	10.0006	65.6809	0
1031	2.0633	223.18	119.873	2.1543	-0.1621	2861.282051	0.043085999	-0.016205201	20	0	10.0002	65.6807	0
1032	2.0634	223.87	120.04	2.1568	-0.1609	2870.128205	0.043136449	-0.016091601	20	0	10.0002	65.6807	0
1033	2.0635	224.53	120.21	2.1595	-0.1598	2878.564103	0.043189349	-0.015981201	20	0	9.9993	65.6808	0
1034	2.0635	225.14	120.368	2.1621	-0.1587	2886.358974	0.043241649	-0.015874801	20	0	9.9998	65.6809	0
1035	2.0636	225.86	120.538	2.1649	-0.1576	2895.641026	0.043298999	-0.015762001	20	0	9.9998	65.6812	0
1036	2.0637	226.52	120.709	2.1681	-0.1565	2904.076923	0.043362049	-0.015648601	20	0	10.0002	65.6814	0
1037	2.0638	227.16	120.869	2.1708	-0.1554	2912.282051	0.043416249	-0.015539801	20	0	9.9998	65.6814	0
1038	2.0639	227.82	121.039	2.1738	-0.1542	2920.717949	0.043476099	-0.015424601	20	0	10.0006	65.6814	0
1039	2.064	228.47	121.201	2.1765	-0.1532	2929.153846	0.043529049	-0.015319001	20	0	10.0006	65.6814	0
1040	2.0641	229.16	121.373	2.1793	-0.152	2938	0.043586999	-0.015201601	20	0	10.0014	65.6812	0
1041	2.0641	229.84	121.545	2.182	-0.1508	2946.641026	0.043639949	-0.015084801	20	0	10.0006	65.6808	0
1042	2.0642	230.51	121.717	2.1848	-0.1497	2955.282051	0.043695399	-0.014968201	20	0	10.0006	65.6803	0
1043	2.0643	231.17	121.881	2.1875	-0.1486	2963.717949	0.043750249	-0.014858601	20	0	10.0002	65.6799	0
1044	2.0644	231.86	122.054	2.1903	-0.1474	2972.564103	0.043805699	-0.014740201	20	0	10.0006	65.6797	0
1045	2.0645	232.52	122.219	2.1934	-0.1463	2981	0.043867449	-0.014629201	20	0	10.0002	65.6796	0
1046	2.0646	233.21	122.393	2.1966	-0.1451	2989.846154	0.043932999	-0.014509201	20	0	9.9998	65.6797	0
1047	2.0647	233.87	122.558	2.1995	-0.144	2998.282051	0.043989699	-0.014396601	20	0	10.0002	65.6798	0
1048	2.0648	234.56	122.734	2.2026	-0.1428	3007.128205	0.044052099	-0.014276801	20	0	9.9993	65.6801	0
1049	2.0648	235.25	122.91	2.2055	-0.1416	3015.974359	0.044110699	-0.014157601	20	0	9.9998	65.6803	0
1050	2.0649	235.95	123.086	2.2085	-0.1403	3025.051282	0.044169349	-0.014033001	20	0	10.0002	65.6805	0
1051	2.065	236.59	123.251	2.211	-0.1392	3033.25641	0.044220999	-0.013921201	20	0	10.001	65.6806	0
1052	2.0651	237.28	123.427	2.214	-0.138	3042.102564	0.044279599	-0.013798201	20	0	10.0002	65.6806	0
1053	2.0652	237.96	123.593	2.217	-0.1368	3050.74359	0.044340749	-0.013684601	20	0	10.0006	65.6805	0
1054	2.0653	238.67	123.77	2.2203	-0.1356	3059.820513	0.044406899	-0.013561601	20	0	10.0006	65.6803	0
1055	2.0654	239.37	123.947	2.2233	-0.1344	3068.871795	0.044466149	-0.013437001	20	0	10.0014	65.6799	0
1056	2.0655	240	124.114	2.2264	-0.1332	3076.897436	0.044527299	-0.013322801	20	0	10.001	65.6795	0
1057	2.0655	240.72	124.292	2.2294	-0.132	3086.153846	0.044587149	-0.013199001	20	0	10.0002	65.6792	0
1058	2.0656	241.41	124.471	2.2323	-0.1307	3095.025641	0.044645749	-0.013074401	20	0	9.9998	65.679	0
1059	2.0657	242.07	124.638	2.2353	-0.1296	3103.435897	0.044706249	-0.012957601	20	0	10.0002	65.679	0
1060	2.0658	242.76	124.816	2.2385	-0.1284	3112.307692	0.044769249	-0.012836201	20	0	10.0006	65.679	0
1061	2.0659	243.43	124.984	2.2413	-0.1272	3120.948718	0.044826599	-0.012720401	20	0	10.0006	65.6788	0
1062	2.066	244.14	125.163	2.2447	-0.126	3130	0.044894049	-0.012595801	20	0	10.0002	65.6788	0
1063	2.0661	244.76	125.329	2.2475	-0.1248	3138	0.044949499	-0.012479801	20	0	10.0002	65.6788	0
1064	2.0661	245.47	125.508	2.2505	-0.1235	3147.076923	0.045009999	-0.012354601	20	0	10.0002	65.6788	0
1065	2.0662	246.18	125.686	2.254	-0.1223	3156.128205	0.045080599	-0.012230001	20	0	10.0006	65.6788	0
1066	2.0663	246.84	125.855	2.257	-0.1211	3164.564103	0.045139199	-0.012113201	20	0	10.0002	65.6788	0
1067	2.0664	247.54	126.034	2.26	-0.1199	3173.615385	0.045200949	-0.011986401	20	0	10.0006	65.6788	0
1068	2.0665	248.27	126.213	2.2633	-0.1186	3182.897436	0.045265849	-0.011860201	20	0	10.001	65.6788	0
1069	2.0666	248.92	126.381	2.2663	-0.1174	3191.333333	0.045325099	-0.011743401	20	0	10.0006	65.6786	0
1070	2.0667	249.61	126.56	2.2696	-0.1162	3200.179487	0.045392549	-0.011616601	20	0	10.001	65.6783	0
1071	2.0668	250.3	126.739	2.2729	-0.1149	3209.025641	0.045458099	-0.011491201	20	0	10.0002	65.6781	0
1072	2.0668	250.96	126.907	2.2759	-0.1137	3217.461538	0.045517949	-0.011373801	20	0	10.0006	65.6781	0
1073	2.0669	251.67	127.086	2.2789	-0.1125	3226.538462	0.045577799	-0.011247601	20	0	10.0002	65.6781	0
1074	2.067	252.29	127.254	2.2821	-0.1113	3234.538462	0.045641449	-0.011130801	20	0	9.9998	65.6779	0
1075	2.0671	253.02	127.433	2.2854	-0.1101	3243.820513	0.045708249	-0.011005601	20	0	9.9998	65.6777	0
1076	2.0672	253.72	127.612	2.2885	-0.1088	3252.871795	0.045769399	-0.010881801	20	0	10.0002	65.6777	0
1077	2.0673	254.38	127.779	2.2914	-0.1076	3261.307692	0.045827399	-0.010762001	20	0	9.9998	65.6777	0
1078	2.0674	255.07	127.958	2.2948	-0.1064	3270.153846	0.045896049	-0.010635801	20	0	10.0006	65.6777	0
1079	2.0674	255.75	128.136	2.2979	-0.1051	3278.794872	0.045958449	-0.010508	20	0	10.0002	65.6778	0
1080	2.0675	256.44	128.304	2.3009	-0.1039	3287.641026	0.046018949	-0.0103914	20	0	9.9998	65.6779	0
1081	2.0676	257.11	128.481	2.3043	-0.1026	3296.282051	0.046086399	-0.0102636	20	0	10.0006	65.678	0
1082	2.0677	257.78	128.648	2.3074	-0.1014	3304.923077	0.046147499	-0.010143	20	0	10.0002	65.678	0
1083	2.0678	258.44	128.825	2.3107	-0.1002	3313.358974	0.046213049	-0.0100152	20	0	10.0002	65.6779	0
1084	2.0679	259.12	129.002	2.3137	-0.0989	3322	0.046274799	-0.0098884	20	0	10.0014	65.6777	0
1085	2.068	259.79	129.167	2.3169	-0.0977	3330.641026	0.046337849	-0.0097692	20	0	10.0002	65.6775	0
1086	2.0681	260.45	129.344	2.3202	-0.0964	3339.076923	0.046403999	-0.0096432	20	0	10.001	65.6772	0
1087	2.0681	261.15	129.521	2.3236	-0.0951	3348.128205	0.046472049	-0.0095146	20	0	10.0002	65.6768	0
1088	2.0682	261.8	129.686	2.3267	-0.094	3356.358974	0.046534449	-0.0093964	20	0	9.9993	65.6768	0
1089	2.0683	262.49	129.862	2.3299	-0.0927	3365.205128	0.046598099	-0.0092686	20	0	10.0002	65.6769	0
1090	2.0684	263.11	130.028	2.333	-0.0915	3373.205128	0.046659849	-0.0091496	20	0	9.9993	65.6771	0
1091	2.0685	263.77	130.202	2.3362	-0.0902	3381.641026	0.046724799	-0.0090226	20	0	10.0006	65.6775	0
1092	2.0686	264.44	130.378	2.3396	-0.089	3390.282051	0.046792199	-0.0088958	20	0	10.0002	65.6777	0
1093	2.0687	265.1	130.542	2.3426	-0.0878	3398.717949	0.046852699	-0.0087766	20	0	10.0002	65.6778	0
1094	2.0687	265.77	130.716	2.3458	-0.0865	3407.358974	0.046916999	-0.0086498	20	0	10.0006	65.6778	0
1095	2.0688	266.41	130.889	2.3491	-0.0852	3415.564103	0.046982549	-0.0085228	20	0	10.0014	65.6777	0
1096	2.0689	267.06	131.051	2.3521	-0.084	3423.794872	0.047042399	-0.0084046	20	0	10.0002	65.6774	0
1097	2.069	267.73	131.224	2.3554	-0.0828	3432.435897	0.047107949	-0.008276	20	0	10.001	65.677	0
1098	2.0691	268.35	131.385	2.3584	-0.0816	3440.435897	0.047168449	-0.0081578	20	0	10.0006	65.6766	0
1099	2.0692	269.01	131.557	2.3617	-0.0803	3448.871795	0.047233999	-0.0080308	20	0	10.0002	65.6762	0
1100	2.0693	269.65	131.728	2.365	-0.079	3457.102564	0.047299499	-0.007903	20	0	10.0006	65.6761	0
1101	2.0694	270.29	131.888	2.3681	-0.0779	3465.307692	0.047361299	-0.0077856	20	0	9.9998	65.6762	0
1102	2.0694	270.95	132.058	2.3714	-0.0766	3473.74359	0.047427449	-0.0076586	20	0	10.0006	65.6764	0
1103	2.0695	271.54	132.217	2.3745	-0.0754	3481.333333	0.047489849	-0.0075412	20	0	9.9998	65.6766	0
1104	2.0696	272.19	132.386	2.3775	-0.0742	3489.564103	0.047550949	-0.007415	20	0	10.0002	65.6769	0
1105	2.0697	272.86	132.555	2.3809	-0.0729	3498.205128	0.047617149	-0.0072912	20	0	9.9998	65.6772	0
1106	2.0698	273.45	132.712	2.3839	-0.0718	3505.769231	0.047678899	-0.0071754	20	0	10.0002	65.6775	0
1107	2.0699	274.08	132.88	2.3872	-0.0705	3513.794872	0.047743799	-0.0070508	20	0	10.0002	65.6775	0
1108	2.07	274.73	133.047	2.3904	-0.0692	3522.230769	0.047807449	-0.0069246	20	0	10.0006	65.6775	0
1109	2.0701	275.32	133.202	2.3934	-0.0681	3529.794872	0.047868599	-0.0068096	20	0	10.0002	65.6774	0
1110	2.0701	275.97	133.368	2.3966	-0.0669	3538.025641	0.047932249	-0.0066858	20	0	10.0002	65.6773	0
1111	2.0702	276.62	133.532	2.3999	-0.0656	3546.461538	0.047997149	-0.0065636	20	0	10.0006	65.6771	0
1112	2.0703	277.17	133.686	2.403	-0.0645	3553.410256	0.048060799	-0.00645	20	0	10.001	65.6767	0
1113	2.0704	277.81	133.848	2.4059	-0.0633	3561.641026	0.048118799	-0.0063262	20	0	10.001	65.6763	0
1114	2.0705	278.38	134.001	2.409	-0.0621	3569	0.048180549	-0.0062134	20	0	10.001	65.6758	0
1115	2.0706	278.99	134.163	2.4121	-0.0609	3576.794872	0.048241649	-0.0060912	20	0	10.0006	65.6755	0
1116	2.0707	279.58	134.323	2.4153	-0.0597	3584.384615	0.048306599	-0.0059714	20	0	10.0002	65.6752	0
1117	2.0707	280.17	134.474	2.4183	-0.0586	3591.974359	0.048366449	-0.0058586	20	0	9.9993	65.6752	0
1118	2.0708	280.77	134.633	2.4215	-0.0574	3599.564103	0.048430099	-0.0057396	20	0	10.0002	65.6753	0
1119	2.0709	281.36	134.792	2.4247	-0.0562	3607.153846	0.048493749	-0.0056206	20	0	10.0002	65.6756	0
1120	2.071	281.95	134.941	2.4276	-0.0551	3614.74359	0.048551099	-0.005511	20	0	9.9998	65.6757	0
1121	2.0711	282.53	135.098	2.4305	-0.0539	3622.128205	0.048610349	-0.005392	20	0	9.9998	65.6759	0
1122	2.0712	283.08	135.245	2.4334	-0.0528	3629.282051	0.048668949	-0.0052816	20	0	10.0002	65.676	0
1123	2.0713	283.66	135.4	2.4366	-0.0516	3636.666667	0.048731349	-0.0051632	20	0	9.9998	65.676	0
1124	2.0714	284.25	135.554	2.4397	-0.0505	3644.25641	0.048793699	-0.0050466	20	0	10.0002	65.6759	0
1125	2.0714	284.81	135.698	2.4426	-0.0494	3651.410256	0.048851049	-0.0049354	20	0	10.0002	65.6759	0
1126	2.0715	285.37	135.85	2.4456	-0.0482	3658.589744	0.048912199	-0.0048204	20	0	10.0006	65.6758	0
1127	2.0716	285.96	136.002	2.4485	-0.047	3666.153846	0.048970799	-0.0047044	20	0	10.0006	65.6756	0
1128	2.0717	286.49	136.143	2.4515	-0.046	3672.923077	0.049029399	-0.0045956	20	0	10.0006	65.6753	0
1129	2.0718	287.03	136.292	2.4546	-0.0448	3679.871795	0.049091799	-0.004482	20	0	10.0006	65.6749	0
1130	2.0719	287.57	136.432	2.4572	-0.0438	3686.820513	0.049144749	-0.0043756	20	0	10.0002	65.6745	0
1131	2.072	288.13	136.58	2.4602	-0.0426	3693.974359	0.049204599	-0.004263	20	0	9.9993	65.6745	0
1132	2.072	288.67	136.726	2.4634	-0.0415	3700.948718	0.049267649	-0.0041494	20	0	9.9993	65.6747	0
1133	2.0721	289.18	136.864	2.4661	-0.0405	3707.487179	0.049321849	-0.0040468	20	0	9.9998	65.675	0
1134	2.0722	289.73	137.01	2.4691	-0.0393	3714.435897	0.049382949	-0.0039334	20	0	9.9993	65.6753	0
1135	2.0723	290.27	137.153	2.4722	-0.0382	3721.384615	0.049444099	-0.0038222	20	0	9.9993	65.6758	0
1136	2.0724	290.78	137.287	2.4748	-0.0372	3727.923077	0.049496399	-0.0037212	20	0	9.9998	65.6762	0
1137	2.0725	291.29	137.43	2.4777	-0.0361	3734.461538	0.049554999	-0.0036108	20	0	10.0002	65.6767	0
1138	2.0726	291.78	137.563	2.4806	-0.0351	3740.769231	0.049611099	-0.0035116	20	0	9.9998	65.6767	0
1139	2.0727	292.29	137.704	2.4833	-0.034	3747.307692	0.049665299	-0.0034044	20	0	10.0006	65.6769	0
1140	2.0727	292.82	137.843	2.4862	-0.033	3754.051282	0.049723249	-0.0032964	20	0	10.0002	65.6772	0
1141	2.0728	293.29	137.972	2.4889	-0.032	3760.153846	0.049777449	-0.0031962	20	0	10.0002	65.6772	0
1142	2.0729	293.82	138.109	2.4917	-0.0309	3766.897436	0.049833549	-0.0030906	20	0	9.9993	65.6773	0
1143	2.073	294.31	138.244	2.4944	-0.0299	3773.230769	0.049888399	-0.002988	20	0	10.001	65.6773	0
1144	2.0731	294.77	138.37	2.4969	-0.0289	3779.128205	0.049938149	-0.0028902	20	0	10.0002	65.6773	0
1145	2.0732	295.25	138.503	2.4997	-0.0279	3785.25641	0.049993599	-0.0027862	20	0	10.001	65.677	0
1146	2.0733	295.74	138.627	2.5023	-0.0269	3791.564103	0.050045949	-0.0026908	20	0	10.0006	65.6766	0
1147	2.0734	296.2	138.758	2.5049	-0.0259	3797.461538	0.050098249	-0.002589	20	0	10.0014	65.6763	0
1148	2.0734	296.68	138.888	2.5078	-0.0249	3803.589744	0.050155599	-0.002489	20	0	10.0006	65.676	0
1149	2.0735	297.11	139.008	2.5102	-0.024	3809.051282	0.050204099	-0.0023952	20	0	10.0002	65.6756	0
1150	2.0736	297.57	139.135	2.5128	-0.023	3814.948718	0.050255799	-0.0022974	20	0	10.0006	65.6753	0
1151	2.0737	298.04	139.253	2.5152	-0.0221	3821.076923	0.050303699	-0.002206	20	0	10.0006	65.6749	0
1152	2.0738	298.47	139.378	2.5178	-0.0211	3826.564103	0.050356599	-0.0021082	20	0	10.0002	65.6744	0
1153	2.0739	298.93	139.502	2.5204	-0.0201	3832.461538	0.050408299	-0.0020128	20	0	10.0002	65.674	0
1154	2.074	299.33	139.617	2.5229	-0.0192	3837.512821	0.050457449	-0.001922	20	0	9.9998	65.6737	0
1155	2.074	299.77	139.739	2.5253	-0.0183	3843.205128	0.050505349	-0.0018266	20	0	9.9993	65.6739	0
1156	2.0741	300.18	139.858	2.5278	-0.0173	3848.461538	0.050555149	-0.0017328	20	0	9.9989	65.6744	0
1157	2.0742	300.62	139.97	2.5301	-0.0165	3854.153846	0.050602999	-0.0016462	20	0	9.9993	65.6748	0
1158	2.0743	301.04	140.087	2.5326	-0.0155	3859.435897	0.050651549	-0.0015538	20	0	9.9989	65.6753	0
1159	2.0744	301.45	140.203	2.535	-0.0146	3864.692308	0.050699449	-0.0014616	20	0	9.9993	65.6757	0
1160	2.0745	301.82	140.311	2.5374	-0.0138	3869.538462	0.050747349	-0.001378	20	0	10.0002	65.676	0
1161	2.0746	302.24	140.425	2.5396	-0.0129	3874.820513	0.050791449	-0.0012882	20	0	9.9993	65.6766	0
1162	2.0747	302.6	140.532	2.542	-0.012	3879.461538	0.050839349	-0.0012046	20	0	10.0002	65.6769	0
1163	2.0747	303.04	140.643	2.5441	-0.0112	3885.153846	0.050882199	-0.001117	20	0	10.0006	65.6769	0
1164	2.0748	303.4	140.752	2.5465	-0.0103	3889.769231	0.050930749	-0.001032	20	0	10.001	65.6768	0
1165	2.0749	303.75	140.854	2.5486	-0.0095	3894.205128	0.050972299	-0.00095	20	0	10.001	65.6766	0
1166	2.075	304.13	140.961	2.5509	-0.0087	3899.051282	0.051018299	-0.0008672	20	0	10.0006	65.6765	0
1167	2.0751	304.5	141.067	2.5532	-0.0079	3903.897436	0.051063699	-0.0007852	20	0	10.0002	65.6764	0
1168	2.0752	304.83	141.164	2.5553	-0.007	3908.128205	0.051105299	-0.0007048	20	0	10.001	65.6761	0
1169	2.0753	305.18	141.266	2.5574	-0.0062	3912.538462	0.051148149	-0.0006228	20	0	10.001	65.6758	0
1170	2.0753	305.52	141.361	2.5595	-0.0055	3916.974359	0.051189099	-0.000547	20	0	10.001	65.6756	0
1171	2.0754	305.9	141.461	2.5615	-0.0047	3921.820513	0.051230699	-0.000469	20	0	10.0006	65.6753	0
1172	2.0755	306.25	141.56	2.5636	-0.0039	3926.230769	0.051272899	-0.0003894	20	0	10.0006	65.675	0
1173	2.0756	306.56	141.651	2.5656	-0.0032	3930.25641	0.051312649	-0.0003168	20	0	10.0002	65.6744	0
1174	2.0757	306.87	141.745	2.5678	-0.0024	3934.25641	0.051356749	-0.0002388	20	0	10.0006	65.674	0
1175	2.0758	307.18	141.838	2.5699	-0.0016	3938.25641	0.051397049	-0.0001632	20	0	10.0006	65.6735	0
1176	2.0759	307.5	141.925	2.5718	-0.001	3942.25641	0.051436749	-9.52E-05	20	0	9.9993	65.6732	0
1177	2.076	307.81	142.017	2.5739	-0.0002	3946.25641	0.051477099	-1.96E-05	20	0	9.9998	65.6732	0
1178	2.076	308.12	142.101	2.5757	0.0005	3950.25641	0.051514299	4.88E-05	20	0	9.9998	65.6733	0
1179	2.0761	308.4	142.189	2.5776	0.0012	3953.846154	0.051552099	0.000119	20	0	9.9993	65.6738	0
1180	2.0762	308.68	142.275	2.5795	0.0019	3957.435897	0.051589899	0.0001906	20	0	9.9998	65.6743	0
1181	2.0763	308.96	142.355	2.5811	0.0025	3961.025641	0.051622699	0.0002546	20	0	10.0002	65.6744	0
1182	2.0764	309.24	142.438	2.583	0.0032	3964.589744	0.051659849	0.000324	20	0	9.9998	65.6748	0
1183	2.0765	309.52	142.52	2.5847	0.0039	3968.179487	0.051693249	0.000391	20	0	10.0002	65.6751	0
1184	2.0766	309.76	142.594	2.5865	0.0045	3971.333333	0.051729799	0.0004524	20	0	9.9998	65.6753	0
1185	2.0766	310.01	142.674	2.5883	0.0052	3974.512821	0.051765099	0.0005194	20	0	9.9993	65.6754	0
1186	2.0767	310.27	142.746	2.5898	0.0058	3977.871795	0.051795999	0.0005778	20	0	10.0002	65.676	0
1187	2.0768	310.5	142.822	2.5916	0.0064	3980.820513	0.051832549	0.0006424	20	0	10.0002	65.676	0
1188	2.0769	310.77	142.896	2.5933	0.007	3984.205128	0.051865299	0.000704	20	0	9.9998	65.676	0
1189	2.077	310.96	142.964	2.5949	0.0076	3986.717949	0.051897449	0.0007624	20	0	9.9993	65.6762	0
1190	2.0771	311.18	143.034	2.5965	0.0082	3989.461538	0.051930849	0.0008206	20	0	9.9998	65.6763	0
1191	2.0772	311.41	143.103	2.5982	0.0088	3992.410256	0.051963599	0.0008806	20	0	10.0002	65.6769	0
1192	2.0773	311.61	143.167	2.5995	0.0093	3994.948718	0.051989449	0.0009334	20	0	10.001	65.6768	0
1193	2.0773	311.85	143.233	2.601	0.0099	3998.102564	0.052019699	0.0009918	20	0	10.0006	65.6765	0
1194	2.0774	312.02	143.293	2.6022	0.0104	4000.205128	0.052044899	0.0010414	20	0	10.001	65.6762	0
1195	2.0775	312.23	143.356	2.6038	0.0109	4002.948718	0.052075149	0.0010942	20	0	10.001	65.6758	0
1196	2.0776	312.39	143.417	2.6052	0.0115	4005.051282	0.052104799	0.001147	20	0	9.9998	65.6755	0
1197	2.0777	312.56	143.473	2.6064	0.012	4007.179487	0.052128099	0.0011952	20	0	10.0014	65.6751	0
1198	2.0778	312.76	143.531	2.6079	0.0124	4009.692308	0.052158349	0.001244	20	0	10.0002	65.6746	0
1199	2.0779	312.9	143.588	2.6092	0.013	4011.589744	0.052184199	0.0012952	20	0	10.001	65.6743	0
1200	2.078	313.09	143.639	2.6104	0.0134	4013.923077	0.052207499	0.0013394	20	0	10.001	65.6739	0
1201	2.078	313.23	143.693	2.6117	0.0139	4015.820513	0.052233999	0.0013876	20	0	10.001	65.6735	0
1202	2.0781	313.38	143.741	2.6129	0.0143	4017.717949	0.052257299	0.0014308	20	0	10.001	65.6732	0
1203	2.0783	313.64	143.841	2.6151	0.0152	4021.076923	0.052302649	0.0015208	20	0	9.9998	65.6726	0
1204	2.0784	313.78	143.886	2.6162	0.0156	4022.769231	0.052323449	0.0015594	20	0	9.9989	65.6725	0
1205	2.0785	313.89	143.931	2.6173	0.016	4024.230769	0.052345499	0.001602	20	0	9.9989	65.6728	0
1206	2.0786	314.09	144.015	2.6193	0.0168	4026.769231	0.052385849	0.0016792	20	0	9.9993	65.6736	0
1207	2.0788	314.27	144.092	2.6212	0.0175	4029.102564	0.052423649	0.0017534	20	0	9.9998	65.6744	0
1208	2.0789	314.38	144.13	2.6221	0.0179	4030.564103	0.052441299	0.0017896	20	0	9.9993	65.6747	0
1209	2.0791	314.5	144.198	2.6239	0.0186	4032.051282	0.052477849	0.0018558	20	0	9.9998	65.6755	0
1210	2.0793	314.65	144.261	2.6255	0.0192	4033.948718	0.052509349	0.0019212	20	0	10.0002	65.6764	0
1211	2.0794	314.76	144.317	2.6271	0.0198	4035.410256	0.052541499	0.0019796	20	0	10.0002	65.6769	0
1212	2.0799	314.88	144.429	2.6301	0.0211	4036.897436	0.052601399	0.0021074	20	0	10.0006	65.6774	0
1213	2.0805	314.76	144.523	2.6332	0.0224	4035.410256	0.052663149	0.0022414	20	0	10.0006	65.6759	0
1214	2.0806	314.63	144.537	2.6337	0.0227	4033.717949	0.052674499	0.002273	20	0	10.0006	65.6751	0
1215	2.0809	314.43	144.546	2.6344	0.0231	4031.205128	0.052688349	0.0023084	20	0	10.001	65.6742	0
1216	2.0811	314.3	144.546	2.6349	0.0233	4029.512821	0.052698449	0.002332	20	0	10.0002	65.6736	0
1217	2.0812	314.17	144.543	2.635	0.0234	4027.820513	0.052700299	0.0023392	20	0	10.0006	65.6733	0
1218	2.0813	313.96	144.533	2.6353	0.0236	4025.076923	0.052705349	0.0023572	20	0	10.0006	65.6728	0
1219	2.0815	313.73	144.521	2.6354	0.0237	4022.128205	0.052707899	0.0023714	20	0	10.0002	65.6727	0
1220	2.0816	313.61	144.513	2.6354	0.0238	4020.666667	0.052708499	0.002377	20	0	10.0002	65.6727	0
1221	2.0817	313.5	144.502	2.6356	0.0238	4019.179487	0.052712949	0.0023834	20	0	10.0006	65.6727	0
1222	2.0818	313.33	144.492	2.6355	0.0239	4017.076923	0.052709799	0.002388	20	0	10.0006	65.6727	0
1223	2.0819	313.18	144.482	2.6356	0.0239	4015.179487	0.052711649	0.0023936	20	0	10.001	65.6727	0
1224	2.0819	313.04	144.47	2.6356	0.024	4013.282051	0.052712949	0.0023968	20	0	10.0002	65.6726	0
1225	2.082	312.87	144.457	2.6356	0.024	4011.179487	0.052712299	0.002403	20	0	10.0002	65.6726	0
1226	2.0821	312.67	144.445	2.6356	0.0241	4008.641026	0.052712949	0.0024054	20	0	10.001	65.6726	0
1227	2.0822	312.49	144.432	2.6357	0.0241	4006.333333	0.052714199	0.0024102	20	0	10.0002	65.6726	0
1228	2.0823	312.33	144.418	2.6356	0.0241	4004.230769	0.052711649	0.002414	20	0	10.001	65.6726	0
1229	2.0824	312.16	144.405	2.6356	0.0242	4002.102564	0.052712949	0.0024156	20	0	10.0006	65.6726	0
1230	2.0825	311.92	144.389	2.6358	0.0242	3998.948718	0.052715449	0.0024196	20	0	10.0006	65.6726	0
1231	2.0826	311.7	144.374	2.6356	0.0242	3996.205128	0.052712299	0.0024212	20	0	10.0006	65.6726	0
1232	2.0826	311.52	144.359	2.6357	0.0243	3993.897436	0.052713549	0.002425	20	0	9.9998	65.6726	0
1233	2.0827	311.33	144.343	2.6356	0.0243	3991.358974	0.052711649	0.0024282	20	0	10.0002	65.6726	0
1234	2.0828	311.1	144.327	2.6356	0.0243	3988.410256	0.052711049	0.0024298	20	0	10.0002	65.6728	0
1235	2.0829	310.85	144.309	2.6356	0.0243	3985.25641	0.052712299	0.0024298	20	0	10.0006	65.6731	0
1236	2.083	310.64	144.292	2.6356	0.0243	3982.512821	0.052711649	0.002433	20	0	10.0002	65.6733	0
1237	2.0831	310.41	144.273	2.6354	0.0243	3979.564103	0.052708499	0.0024346	20	0	10.0006	65.6734	0
1238	2.0832	310.13	144.253	2.6355	0.0243	3975.974359	0.052710399	0.0024346	20	0	10.0002	65.6737	0
1239	2.0832	309.91	144.236	2.6355	0.0244	3973.230769	0.052709149	0.0024362	20	0	9.9998	65.6737	0
1240	2.0833	309.6	144.214	2.6354	0.0244	3969.230769	0.052708499	0.0024362	20	0	9.9998	65.6738	0
1241	2.0834	309.35	144.193	2.6355	0.0244	3966.076923	0.052709149	0.002437	20	0	9.9993	65.6739	0
1242	2.0835	309.09	144.172	2.6353	0.0244	3962.692308	0.052706599	0.002437	20	0	9.9993	65.6741	0
1243	2.0836	308.79	144.15	2.6354	0.0244	3958.897436	0.052707249	0.002437	20	0	9.9998	65.6745	0
1244	2.0837	308.52	144.128	2.6353	0.0244	3955.333333	0.052705349	0.002437	20	0	10.0002	65.6746	0
1245	2.0838	308.22	144.104	2.6351	0.0244	3951.538462	0.052702849	0.002437	20	0	9.9998	65.6747	0
1246	2.0839	307.92	144.079	2.6351	0.0244	3947.74359	0.052702199	0.0024378	20	0	10.0002	65.6749	0
1247	2.0839	307.64	144.054	2.635	0.0244	3944.153846	0.052699699	0.0024354	20	0	9.9993	65.6749	0
1248	2.084	307.33	144.028	2.6349	0.0243	3940.153846	0.052698449	0.0024346	20	0	9.9998	65.6752	0
1249	2.0841	307	144.003	2.6349	0.0243	3935.923077	0.052697799	0.002433	20	0	10.0002	65.6756	0
1250	2.0842	306.69	143.976	2.6346	0.0243	3931.923077	0.052692749	0.0024314	20	0	10.0002	65.6756	0
1251	2.0843	306.36	143.946	2.6345	0.0243	3927.717949	0.052690849	0.0024298	20	0	10.0002	65.6754	0
1252	2.0844	306.03	143.919	2.6345	0.0243	3923.512821	0.052690249	0.0024266	20	0	10.0006	65.6753	0
1253	2.0845	305.69	143.889	2.6343	0.0242	3919.076923	0.052685199	0.0024244	20	0	10.0006	65.6752	0
1254	2.0845	305.34	143.859	2.634	0.0242	3914.641026	0.052679549	0.0024228	20	0	10.0006	65.6752	0
1255	2.0846	305.01	143.828	2.6338	0.0242	3910.435897	0.052676399	0.0024196	20	0	10.0002	65.6752	0
1256	2.0847	304.64	143.795	2.6335	0.0242	3905.589744	0.052670699	0.0024172	20	0	10.0002	65.6752	0
1257	2.0848	304.31	143.764	2.6333	0.0241	3901.358974	0.052665649	0.002414	20	0	10.0002	65.6751	0
1258	2.0849	303.91	143.727	2.633	0.0241	3896.307692	0.052660599	0.0024094	20	0	10.0006	65.675	0
1259	2.085	303.55	143.692	2.6327	0.024	3891.666667	0.052653049	0.0024046	20	0	10.0002	65.6749	0
1260	2.0851	303.19	143.658	2.6324	0.024	3887.051282	0.052647399	0.0024006	20	0	10.0002	65.6748	0
1261	2.0852	302.78	143.619	2.632	0.024	3881.769231	0.052640449	0.0023968	20	0	9.9998	65.6748	0
1262	2.0852	302.38	143.581	2.6316	0.0239	3876.717949	0.052632249	0.0023912	20	0	10.0002	65.6748	0
1263	2.0853	302.02	143.543	2.6313	0.0239	3872.076923	0.052625949	0.0023856	20	0	9.9998	65.6748	0
1264	2.0854	301.63	143.5	2.6308	0.0238	3867.025641	0.052616499	0.0023818	20	0	9.9998	65.675	0
1265	2.0855	301.23	143.457	2.6303	0.0237	3861.948718	0.052605799	0.0023746	20	0	9.9998	65.6751	0
1266	2.0856	300.82	143.414	2.6298	0.0237	3856.692308	0.052595699	0.0023668	20	0	9.9998	65.6751	0
1267	2.0857	300.39	143.367	2.6292	0.0236	3851.205128	0.052583749	0.0023588	20	0	9.9998	65.6752	0
1268	2.0858	300.03	143.322	2.6286	0.0235	3846.564103	0.052572399	0.002351	20	0	9.9998	65.6753	0
1269	2.0859	299.56	143.271	2.628	0.0234	3840.461538	0.052560399	0.0023424	20	0	10.0002	65.6755	0
1270	2.0859	299.11	143.22	2.6273	0.0234	3834.769231	0.052546549	0.0023352	20	0	9.9998	65.6755	0
1271	2.086	298.72	143.171	2.6267	0.0233	3829.717949	0.052533949	0.0023258	20	0	10.0006	65.6755	0
1272	2.0861	298.27	143.117	2.626	0.0232	3824.025641	0.052519449	0.0023156	20	0	10.0002	65.6757	0
1273	2.0862	297.83	143.06	2.6253	0.023	3818.333333	0.052505599	0.0023036	20	0	10.0002	65.6757	0
1274	2.0863	297.39	143.007	2.6244	0.0229	3812.641026	0.052488599	0.0022926	20	0	9.9998	65.6759	0
1275	2.0864	296.93	142.946	2.6237	0.0228	3806.74359	0.052473449	0.0022792	20	0	9.9993	65.676	0
1276	2.0865	296.5	142.888	2.6228	0.0227	3801.25641	0.052455799	0.0022682	20	0	10.0006	65.6765	0
1277	2.0865	296.04	142.823	2.6219	0.0225	3795.358974	0.052437549	0.0022508	20	0	9.9998	65.6766	0
1278	2.0866	295.58	142.754	2.6209	0.0224	3789.461538	0.052417349	0.002235	20	0	9.9998	65.6767	0
1279	2.0867	295.15	142.685	2.6198	0.0222	3783.974359	0.052395299	0.0022202	20	0	10.0002	65.6767	0
1280	2.0868	294.67	142.608	2.6186	0.022	3777.871795	0.052372599	0.0021996	20	0	9.9998	65.6768	0
1281	2.0869	294.2	142.528	2.6174	0.0218	3771.74359	0.052347399	0.0021776	20	0	9.9998	65.6767	0
1282	2.087	293.7	142.452	2.6161	0.0216	3765.435897	0.052322199	0.0021578	20	0	9.9993	65.6768	0
1283	2.0871	293.21	142.37	2.6149	0.0214	3759.102564	0.052298249	0.0021358	20	0	10.0002	65.6773	0
1284	2.0872	292.73	142.292	2.6136	0.0211	3753	0.052271149	0.0021136	20	0	9.9993	65.6774	0
1285	2.0872	292.19	142.207	2.6122	0.0209	3746.051282	0.052243449	0.0020932	20	0	9.9993	65.6778	0
1286	2.0873	291.67	142.122	2.6108	0.0207	3739.307692	0.052216349	0.0020672	20	0	9.9993	65.6781	0
1287	2.0874	291.19	142.042	2.6095	0.0205	3733.179487	0.052190499	0.0020466	20	0	9.9998	65.6783	0
1288	2.0875	290.65	141.956	2.6082	0.0202	3726.230769	0.052163399	0.0020222	20	0	10.0006	65.6783	0
1289	2.0876	290.14	141.868	2.6067	0.02	3719.692308	0.052133749	0.001997	20	0	10.0006	65.6782	0
1290	2.0877	289.61	141.785	2.6054	0.0197	3712.948718	0.052107949	0.0019726	20	0	10.0006	65.6782	0
1291	2.0878	289.08	141.695	2.604	0.0195	3706.205128	0.052080199	0.001948	20	0	9.9998	65.6782	0
1292	2.0878	288.56	141.609	2.6026	0.0192	3699.461538	0.052051199	0.0019212	20	0	9.9998	65.6782	0
1293	2.0879	288.02	141.518	2.6011	0.019	3692.512821	0.052022849	0.0018952	20	0	9.9998	65.6783	0
1294	2.088	287.46	141.425	2.5996	0.0187	3685.333333	0.051991999	0.0018676	20	0	10.001	65.6783	0
1295	2.0881	286.95	141.338	2.5981	0.0184	3678.820513	0.051962999	0.0018416	20	0	10.0002	65.6783	0
1296	2.0882	286.36	141.244	2.5967	0.0181	3671.230769	0.051934649	0.0018148	20	0	9.9993	65.6784	0
1297	2.0883	285.86	141.155	2.5952	0.0179	3664.897436	0.051903749	0.0017856	20	0	9.9998	65.6785	0
1298	2.0884	285.25	141.059	2.5936	0.0176	3657.102564	0.051871599	0.0017572	20	0	9.9998	65.6785	0
1299	2.0885	284.66	140.963	2.5922	0.0173	3649.512821	0.051843899	0.0017266	20	0	9.9998	65.6785	0
1300	2.0885	284.14	140.872	2.5907	0.017	3642.769231	0.051814249	0.001699	20	0	10.0006	65.6792	0
1301	2.0886	283.58	140.773	2.5891	0.0167	3635.615385	0.051782749	0.001669	20	0	10.0002	65.6791	0
1302	2.0887	282.99	140.674	2.5874	0.0164	3628.025641	0.051748699	0.0016366	20	0	10.0002	65.6792	0
1303	2.0888	282.41	140.58	2.5859	0.0161	3620.641026	0.051717199	0.0016074	20	0	10.0002	65.6792	0
1304	2.0889	281.8	140.479	2.5842	0.0158	3612.846154	0.051683799	0.0015752	20	0	9.9998	65.6793	0
1305	2.089	281.23	140.378	2.5826	0.0154	3605.461538	0.051651649	0.0015428	20	0	10.0002	65.6793	0
1306	2.0891	280.65	140.282	2.581	0.0151	3598.102564	0.051620149	0.001512	20	0	9.9998	65.6794	0
1307	2.0891	280.06	140.179	2.5793	0.0148	3590.512821	0.051585499	0.0014774	20	0	10.0006	65.6798	0
1308	2.0892	279.47	140.081	2.5778	0.0145	3582.923077	0.051555249	0.0014458	20	0	10.001	65.6799	0
1309	2.0893	278.88	139.976	2.576	0.0141	3575.333333	0.051520599	0.001412	20	0	9.9998	65.68	0
1310	2.0894	278.25	139.871	2.5743	0.0138	3567.333333	0.051486549	0.0013764	20	0	9.9998	65.6799	0
1311	2.0895	277.66	139.771	2.5727	0.0134	3559.74359	0.051453799	0.0013418	20	0	9.9993	65.68	0
1312	2.0896	277.05	139.664	2.571	0.0131	3551.923077	0.051419749	0.0013064	20	0	10.0006	65.68	0
1313	2.0897	276.44	139.556	2.5693	0.0127	3544.128205	0.051386349	0.0012692	20	0	10.0002	65.68	0
1314	2.0898	275.85	139.455	2.5676	0.0124	3536.538462	0.051352349	0.0012362	20	0	9.9998	65.68	0
1315	2.0898	275.19	139.345	2.5658	0.012	3528.128205	0.051316399	0.001199	20	0	9.9998	65.6803	0
1316	2.0899	274.62	139.242	2.5642	0.0116	3520.74359	0.051284899	0.001162	20	0	10.0006	65.6809	0
1317	2.09	273.96	139.132	2.5623	0.0112	3512.307692	0.051245199	0.0011242	20	0	10.0006	65.6811	0
1318	2.0901	273.32	139.02	2.5605	0.0108	3504.102564	0.051210549	0.0010848	20	0	10.0006	65.6812	0
1319	2.0902	272.71	138.915	2.5589	0.0105	3496.307692	0.051178399	0.0010486	20	0	10.0006	65.6811	0
1320	2.0903	272.07	138.802	2.5569	0.0101	3488.076923	0.051137449	0.001006	20	0	10.0002	65.6811	0
1321	2.0904	271.4	138.688	2.5551	0.0097	3479.435897	0.051101499	0.0009672	20	0	9.9993	65.6811	0
1322	2.0905	270.8	138.582	2.5534	0.0093	3471.846154	0.051067499	0.000927	20	0	10.0002	65.6812	0
1323	2.0905	270.16	138.467	2.5515	0.0089	3463.641026	0.051029049	0.000886	20	0	9.9998	65.6813	0
1324	2.0906	269.54	138.359	2.5497	0.0085	3455.615385	0.050993749	0.0008458	20	0	10.0002	65.6813	0
1325	2.0907	268.9	138.243	2.5478	0.008	3447.410256	0.050956549	0.0008026	20	0	10.0002	65.6815	0
1326	2.0908	268.22	138.126	2.5457	0.0076	3438.769231	0.050914349	0.0007584	20	0	9.9998	65.6817	0
1327	2.0909	267.6	138.017	2.544	0.0072	3430.74359	0.050880949	0.0007166	20	0	10.0002	65.682	0
1328	2.091	266.92	137.899	2.5422	0.0067	3422.102564	0.050844399	0.0006708	20	0	10.0006	65.6823	0
1329	2.0911	266.27	137.781	2.5402	0.0063	3413.666667	0.050804049	0.0006252	20	0	9.9993	65.6825	0
1330	2.0911	265.64	137.67	2.5385	0.0058	3405.666667	0.050769999	0.0005834	20	0	10.0002	65.683	0
1331	2.0912	264.98	137.551	2.5365	0.0054	3397.230769	0.050730949	0.000536	20	0	10.0006	65.6832	0
1332	2.0913	264.36	137.439	2.5346	0.0049	3389.230769	0.050692499	0.0004926	20	0	10.0002	65.6832	0
1333	2.0914	263.65	137.318	2.5328	0.0045	3380.179487	0.050655349	0.0004454	20	0	10.0002	65.6832	0
1334	2.0915	262.98	137.196	2.5307	0.004	3371.538462	0.050614999	0.0003972	20	0	9.9998	65.6832	0
1335	2.0916	262.34	137.083	2.5289	0.0035	3363.307692	0.050577199	0.0003532	20	0	9.9998	65.6831	0
1336	2.0917	261.68	136.961	2.5269	0.003	3354.871795	0.050538099	0.0003034	20	0	10.0002	65.6831	0
1337	2.0918	260.99	136.837	2.5249	0.0025	3346.025641	0.050497799	0.000253	20	0	9.9998	65.6831	0
1338	2.0918	260.33	136.721	2.5229	0.0021	3337.589744	0.050458099	0.0002072	20	0	9.9998	65.6831	0
1339	2.0919	259.66	136.598	2.5209	0.0016	3328.948718	0.050418999	0.0001568	20	0	10.0002	65.6832	0
1340	2.092	259	136.482	2.5191	0.0011	3320.512821	0.050382449	0.0001088	20	0	9.9998	65.6834	0
1341	2.0921	258.29	136.358	2.517	0.0006	3311.461538	0.050340249	5.90E-05	20	0	9.9993	65.6834	0
1342	2.0922	257.62	136.233	2.5149	0.0001	3302.820513	0.050298649	8.60E-06	20	0	9.9993	65.6836	0
1343	2.0923	257	136.116	2.5131	-0.0004	3294.820513	0.050261449	-4.02E-05	20	0	9.9993	65.6838	0
1344	2.0924	256.27	135.99	2.5111	-0.0009	3285.538462	0.050221099	-9.06E-05	20	0	10.0002	65.6843	0
1345	2.0924	255.61	135.871	2.509	-0.0014	3277.102564	0.050180799	-0.0001394	20	0	9.9998	65.6844	0
1346	2.0925	254.94	135.745	2.507	-0.0019	3268.461538	0.050139849	-0.0001914	20	0	9.9998	65.6848	0
1347	2.0926	254.27	135.619	2.505	-0.0025	3259.820513	0.050100099	-0.0002458	20	0	10.0006	65.685	0
1348	2.0927	253.59	135.5	2.5031	-0.0029	3251.179487	0.050061049	-0.0002948	20	0	9.9998	65.685	0
1349	2.0928	252.9	135.373	2.501	-0.0035	3242.333333	0.050020699	-0.0003476	20	0	9.9998	65.6854	0
1350	2.0929	252.18	135.246	2.4989	-0.004	3233.051282	0.049978499	-0.0004012	20	0	10.0006	65.6856	0
1351	2.093	251.54	135.125	2.497	-0.0045	3224.846154	0.049940699	-0.0004524	20	0	10.001	65.6853	0
1352	2.0931	250.86	134.997	2.4949	-0.0051	3216.205128	0.049897849	-0.0005068	20	0	10.0002	65.6852	0
1353	2.0931	250.17	134.876	2.4929	-0.0056	3207.358974	0.049858149	-0.0005582	20	0	10.0006	65.6852	0
1354	2.0932	249.47	134.747	2.4908	-0.0061	3198.282051	0.049816549	-0.0006132	20	0	9.9998	65.6852	0
1355	2.0933	248.78	134.618	2.4888	-0.0067	3189.435897	0.049775549	-0.0006684	20	0	10.0002	65.6852	0
1356	2.0934	248.12	134.497	2.4868	-0.0072	3181	0.049735849	-0.000722	20	0	9.9998	65.6852	0
1357	2.0935	247.44	134.368	2.4847	-0.0078	3172.358974	0.049694299	-0.0007772	20	0	10.0006	65.6852	0
1358	2.0936	246.74	134.238	2.4826	-0.0083	3163.307692	0.049652049	-0.000834	20	0	10.0002	65.6855	0
1359	2.0937	246.05	134.115	2.4806	-0.0089	3154.435897	0.049612349	-0.0008868	20	0	9.9989	65.6857	0
1360	2.0937	245.36	133.985	2.4785	-0.0094	3145.589744	0.049570149	-0.0009428	20	0	9.9993	65.6861	0
1361	2.0938	244.72	133.864	2.4765	-0.01	3137.384615	0.049529799	-0.000998	20	0	10.0002	65.6867	0
1362	2.0939	244.02	133.733	2.4743	-0.0106	3128.512821	0.049486949	-0.0010556	20	0	10.001	65.6871	0
1363	2.094	243.33	133.602	2.4723	-0.0111	3119.666667	0.049446599	-0.0011132	20	0	10.0006	65.6871	0
1364	2.0941	242.66	133.479	2.4704	-0.0117	3111.025641	0.049407549	-0.0011668	20	0	9.9998	65.6872	0
1365	2.0942	241.95	133.348	2.4681	-0.0123	3101.974359	0.049362799	-0.001226	20	0	10.001	65.687	0
1366	2.0943	241.25	133.216	2.466	-0.0128	3092.897436	0.049320549	-0.0012834	20	0	10.0002	65.6869	0
1367	2.0944	240.57	133.093	2.4642	-0.0134	3084.25641	0.049283399	-0.0013362	20	0	10.0002	65.6869	0
1368	2.0944	239.92	132.961	2.462	-0.014	3075.846154	0.049240549	-0.001397	20	0	9.9998	65.6869	0
1369	2.0945	239.19	132.828	2.46	-0.0146	3066.564103	0.049200199	-0.0014554	20	0	9.9998	65.687	0
1370	2.0946	238.55	132.704	2.4578	-0.0151	3058.333333	0.049156699	-0.0015128	20	0	9.9993	65.6871	0
1371	2.0947	237.84	132.572	2.4557	-0.0157	3049.282051	0.049113249	-0.0015728	20	0	9.9998	65.6873	0
1372	2.0948	237.17	132.448	2.4537	-0.0163	3040.641026	0.049074149	-0.0016272	20	0	10.0006	65.6877	0
1373	2.0949	236.5	132.315	2.4516	-0.0169	3032	0.049031299	-0.0016872	20	0	10.001	65.6882	0
1374	2.095	235.79	132.183	2.4493	-0.0175	3022.923077	0.048985949	-0.0017486	20	0	10.0006	65.688	0
1375	2.0951	235.15	132.059	2.4475	-0.0181	3014.717949	0.048949999	-0.0018054	20	0	10.0002	65.6877	0
1376	2.0951	234.47	131.926	2.4453	-0.0186	3006.076923	0.048906549	-0.0018638	20	0	10.0006	65.6875	0
1377	2.0952	233.8	131.802	2.4434	-0.0192	2997.435897	0.048868099	-0.0019206	20	0	10.001	65.6873	0
1378	2.0953	233.11	131.669	2.4413	-0.0198	2988.589744	0.048825249	-0.001982	20	0	10.0006	65.6871	0
1379	2.0954	232.42	131.536	2.4391	-0.0204	2979.717949	0.048781099	-0.0020428	20	0	10.0006	65.687	0
1380	2.0955	231.76	131.411	2.4371	-0.021	2971.307692	0.048741399	-0.0020978	20	0	10.0002	65.687	0
1381	2.0956	231.05	131.279	2.4351	-0.0216	2962.230769	0.048701099	-0.002161	20	0	9.9998	65.687	0
1382	2.0957	230.41	131.146	2.4328	-0.0222	2954.025641	0.048655099	-0.0022216	20	0	10.0002	65.687	0
1383	2.0957	229.74	131.023	2.4308	-0.0228	2945.384615	0.048615999	-0.0022784	20	0	9.9998	65.687	0
1384	2.0958	229.08	130.889	2.4287	-0.0234	2936.948718	0.048573799	-0.0023416	20	0	9.9993	65.687	0
1385	2.0959	228.37	130.757	2.4265	-0.024	2927.871795	0.048530949	-0.002403	20	0	9.9998	65.6873	0
1386	2.096	227.75	130.634	2.4246	-0.0246	2919.871795	0.048492499	-0.0024614	20	0	10.0002	65.6875	0
1387	2.0961	227.06	130.502	2.4224	-0.0252	2911.025641	0.048447749	-0.0025212	20	0	10.0002	65.6876	0
1388	2.0962	226.44	130.378	2.4205	-0.0258	2903.025641	0.048409949	-0.0025796	20	0	9.9993	65.6877	0
1389	2.0963	225.76	130.247	2.4184	-0.0264	2894.384615	0.048368349	-0.0026412	20	0	9.9993	65.6878	0
1390	2.0964	225.05	130.114	2.4164	-0.027	2885.307692	0.048327999	-0.0027026	20	0	9.9993	65.688	0
1391	2.0964	224.48	129.991	2.4144	-0.0276	2877.923077	0.048288299	-0.0027626	20	0	10.0002	65.6889	0
1392	2.0965	223.79	129.859	2.4123	-0.0283	2869.076923	0.048246699	-0.0028256	20	0	10.0002	65.689	0
1393	2.0966	223.11	129.728	2.4102	-0.0289	2860.435897	0.048204499	-0.0028856	20	0	10.001	65.6886	0
1394	2.0967	222.47	129.605	2.4082	-0.0294	2852.230769	0.048164799	-0.0029438	20	0	10.0006	65.6883	0
1395	2.0968	221.82	129.475	2.4062	-0.0301	2843.794872	0.048124449	-0.003007	20	0	10.0006	65.6881	0
1396	2.0969	221.22	129.352	2.4042	-0.0306	2836.205128	0.048083499	-0.0030622	20	0	10.0006	65.688	0
1397	2.097	220.55	129.222	2.4022	-0.0313	2827.564103	0.048043149	-0.0031252	20	0	10.0006	65.6878	0
1398	2.097	219.89	129.092	2.4002	-0.0319	2819.128205	0.048004099	-0.0031876	20	0	9.9998	65.6876	0
1399	2.0971	219.28	128.97	2.3982	-0.0324	2811.333333	0.047964399	-0.0032434	20	0	9.9998	65.6876	0
1400	2.0972	218.61	128.841	2.3962	-0.0331	2802.692308	0.047924699	-0.0033066	20	0	9.9998	65.6876	0
1401	2.0973	217.99	128.712	2.3942	-0.0337	2794.692308	0.047883099	-0.0033672	20	0	9.9993	65.6877	0
1402	2.0974	217.36	128.592	2.3924	-0.0342	2786.666667	0.047847799	-0.0034232	20	0	10.0006	65.688	0
1403	2.0975	216.72	128.463	2.3903	-0.0348	2778.461538	0.047806199	-0.0034848	20	0	10.0002	65.6883	0
1404	2.0976	216.11	128.344	2.3884	-0.0354	2770.666667	0.047767749	-0.0035422	20	0	9.9998	65.6887	0
1405	2.0977	215.49	128.216	2.3863	-0.036	2762.641026	0.047726149	-0.003603	20	0	9.9993	65.6888	0
1406	2.0977	214.85	128.089	2.3843	-0.0366	2754.435897	0.047686449	-0.0036646	20	0	9.9998	65.6892	0
1407	2.0978	214.27	127.971	2.3824	-0.0372	2747.051282	0.047648649	-0.003722	20	0	9.9998	65.6897	0
1408	2.0979	213.63	127.844	2.3805	-0.0378	2738.846154	0.047609599	-0.003782	20	0	10.001	65.69	0
1409	2.098	213	127.719	2.3785	-0.0384	2730.820513	0.047569249	-0.0038418	20	0	10.0006	65.6898	0
1410	2.0981	212.43	127.602	2.3766	-0.039	2723.435897	0.047532049	-0.0038978	20	0	10.0006	65.6895	0
1411	2.0982	211.82	127.477	2.3746	-0.0396	2715.641026	0.047492999	-0.0039578	20	0	10.001	65.6893	0
1412	2.0983	211.21	127.36	2.3729	-0.0402	2707.846154	0.047457699	-0.0040154	20	0	10.001	65.689	0
1413	2.0984	210.6	127.237	2.3709	-0.0408	2700.051282	0.047417999	-0.004076	20	0	10.0002	65.6886	0
1414	2.0984	210	127.114	2.369	-0.0414	2692.25641	0.047380199	-0.0041368	20	0	10.0006	65.6883	0
1415	2.0985	209.44	126.998	2.367	-0.0419	2685.102564	0.047339849	-0.0041912	20	0	10.0006	65.6881	0
1416	2.0986	208.81	126.875	2.3652	-0.0425	2677.076923	0.047303299	-0.0042504	20	0	10.0002	65.688	0
1417	2.0987	208.27	126.761	2.3635	-0.0431	2670.128205	0.047270549	-0.0043062	20	0	9.9993	65.6879	0
1418	2.0988	207.68	126.639	2.3614	-0.0437	2662.538462	0.047228949	-0.004367	20	0	10.0006	65.6879	0
1419	2.0989	207.09	126.519	2.3596	-0.0442	2654.948718	0.047191749	-0.0044246	20	0	9.9993	65.6879	0
1420	2.099	206.51	126.406	2.3578	-0.0448	2647.564103	0.047155849	-0.0044798	20	0	9.9998	65.688	0
1421	2.099	205.94	126.287	2.3558	-0.0454	2640.205128	0.047116749	-0.0045372	20	0	9.9998	65.6883	0
1422	2.0991	205.36	126.168	2.3541	-0.046	2632.820513	0.047082099	-0.0045964	20	0	10.0002	65.6883	0
1423	2.0992	204.83	126.056	2.3523	-0.0465	2626.076923	0.047046199	-0.0046516	20	0	9.9993	65.6884	0
1424	2.0993	204.24	125.94	2.3504	-0.0471	2618.487179	0.047007749	-0.0047092	20	0	9.9993	65.6886	0
1425	2.0994	203.67	125.824	2.3487	-0.0477	2611.102564	0.046973099	-0.0047682	20	0	9.9989	65.6892	0
1426	2.0995	203.14	125.715	2.347	-0.0482	2604.358974	0.046939049	-0.0048226	20	0	9.9998	65.6898	0
1427	2.0996	202.58	125.6	2.3452	-0.0488	2597.205128	0.046904399	-0.0048778	20	0	9.9998	65.6903	0
1428	2.0997	202.06	125.493	2.3435	-0.0493	2590.461538	0.046870349	-0.0049308	20	0	10.0006	65.6907	0
1429	2.0997	201.51	125.378	2.3418	-0.0499	2583.512821	0.046835049	-0.0049866	20	0	10.001	65.691	0
1430	2.0998	200.94	125.265	2.3399	-0.0504	2576.128205	0.046797899	-0.0050442	20	0	10.001	65.6906	0
1431	2.0999	200.46	125.161	2.3384	-0.051	2570.025641	0.046767649	-0.0050954	20	0	10.001	65.6903	0
1432	2.1	199.94	125.049	2.3368	-0.0515	2563.282051	0.046735499	-0.0051506	20	0	10.001	65.6899	0
1433	2.1001	199.38	124.939	2.335	-0.0521	2556.102564	0.046700849	-0.005205	20	0	10.0002	65.6896	0
1434	2.1002	198.9	124.836	2.3335	-0.0526	2550	0.046669299	-0.0052556	20	0	10.0006	65.6893	0
1435	2.1003	198.34	124.726	2.3317	-0.0531	2542.820513	0.046634649	-0.0053116	20	0	9.9998	65.6891	0
1436	2.1003	197.86	124.623	2.3301	-0.0536	2536.717949	0.046601899	-0.005362	20	0	9.9993	65.6889	0
1437	2.1004	197.35	124.515	2.3283	-0.0541	2530.179487	0.046565349	-0.005414	20	0	10.0006	65.6889	0
1438	2.1005	196.84	124.408	2.3266	-0.0547	2523.641026	0.046531949	-0.0054668	20	0	10.0002	65.6888	0
1439	2.1006	196.35	124.309	2.3252	-0.0552	2517.333333	0.046503599	-0.005518	20	0	10.0002	65.6888	0
1440	2.1007	195.86	124.204	2.3234	-0.0557	2511	0.046468899	-0.0055694	20	0	10.0006	65.6888	0
1441	2.1008	195.38	124.106	2.3219	-0.0562	2504.897436	0.046438649	-0.005619	20	0	9.9993	65.6888	0
1442	2.1009	194.9	124.002	2.3202	-0.0567	2498.769231	0.046404649	-0.0056702	20	0	9.9998	65.6888	0
1443	2.101	194.41	123.899	2.3187	-0.0572	2492.461538	0.046373749	-0.0057222	20	0	9.9998	65.689	0
1444	2.101	193.97	123.803	2.3173	-0.0577	2486.769231	0.046345399	-0.0057704	20	0	9.9998	65.6895	0
1445	2.1011	193.47	123.702	2.3157	-0.0582	2480.435897	0.046313249	-0.00582	20	0	9.9993	65.6896	0
1446	2.1012	193.01	123.603	2.3141	-0.0587	2474.538462	0.046281749	-0.005872	20	0	9.9993	65.69	0
1447	2.1013	192.57	123.51	2.3126	-0.0592	2468.846154	0.046252749	-0.005917	20	0	9.9993	65.6903	0
1448	2.1014	192.11	123.412	2.3112	-0.0597	2462.948718	0.046223749	-0.0059674	20	0	9.9998	65.6907	0
1449	2.1015	191.67	123.315	2.3096	-0.0602	2457.25641	0.046191649	-0.0060156	20	0	9.9998	65.6912	0
1450	2.1016	191.22	123.226	2.3083	-0.0606	2451.564103	0.046165799	-0.0060606	20	0	9.9998	65.6916	0
1451	2.1016	190.78	123.13	2.3069	-0.0611	2445.871795	0.046137449	-0.0061086	20	0	10.001	65.6921	0
1452	2.1017	190.35	123.041	2.3054	-0.0615	2440.410256	0.046108449	-0.0061528	20	0	10.0006	65.6918	0
1453	2.1018	189.92	122.948	2.304	-0.062	2434.923077	0.046080699	-0.0061992	20	0	10.0006	65.6912	0
1454	2.1019	189.5	122.856	2.3026	-0.0625	2429.435897	0.046051749	-0.006245	20	0	10.001	65.6906	0
1455	2.102	189.1	122.771	2.3014	-0.0629	2424.384615	0.046027799	-0.0062892	20	0	10.001	65.6902	0
1456	2.1021	188.67	122.682	2.2999	-0.0633	2418.897436	0.045997549	-0.0063348	20	0	10.0006	65.6896	0
1457	2.1022	188.26	122.593	2.2985	-0.0638	2413.641026	0.045969799	-0.0063814	20	0	10.0002	65.6891	0
1458	2.1023	187.9	122.51	2.2972	-0.0642	2409	0.045943349	-0.0064216	20	0	10.0006	65.6885	0
1459	2.1023	187.51	122.423	2.296	-0.0647	2403.948718	0.045919399	-0.0064674	20	0	10.0002	65.6882	0
1460	2.1024	187.1	122.342	2.2947	-0.0651	2398.666667	0.045893549	-0.0065084	20	0	10.0002	65.688	0
1461	2.1025	186.72	122.257	2.2934	-0.0655	2393.820513	0.045867699	-0.0065502	20	0	10.0002	65.688	0
1462	2.1026	186.34	122.174	2.2922	-0.0659	2388.974359	0.045843149	-0.0065942	20	0	9.9998	65.688	0
1463	2.1027	185.98	122.097	2.2909	-0.0663	2384.333333	0.045818549	-0.006633	20	0	9.9998	65.688	0
1464	2.1028	185.6	122.015	2.2897	-0.0667	2379.487179	0.045793999	-0.0066732	20	0	9.9998	65.688	0
1465	2.1029	185.27	121.94	2.2885	-0.0671	2375.282051	0.045770649	-0.0067126	20	0	10.0002	65.688	0
1466	2.103	184.89	121.862	2.2874	-0.0675	2370.435897	0.045747349	-0.0067528	20	0	9.9993	65.688	0
1467	2.103	184.55	121.785	2.2862	-0.0679	2366	0.045724049	-0.0067922	20	0	9.9998	65.6882	0
1468	2.1031	184.2	121.713	2.285	-0.0683	2361.589744	0.045700099	-0.00683	20	0	9.9998	65.6882	0
1469	2.1032	183.87	121.637	2.2839	-0.0687	2357.358974	0.045677999	-0.006867	20	0	9.9998	65.6884	0
1470	2.1033	183.53	121.562	2.2828	-0.0691	2352.948718	0.045655949	-0.0069058	20	0	9.9998	65.6889	0
1471	2.1034	183.22	121.494	2.2817	-0.0694	2348.923077	0.045634549	-0.0069404	20	0	9.9993	65.6894	0
1472	2.1035	182.89	121.424	2.2807	-0.0698	2344.717949	0.045613099	-0.0069774	20	0	9.9998	65.6897	0
1473	2.1036	182.56	121.353	2.2796	-0.0701	2340.512821	0.045592299	-0.0070138	20	0	9.9989	65.6902	0
1474	2.1036	182.25	121.287	2.2787	-0.0705	2336.487179	0.045573399	-0.0070468	20	0	9.9985	65.6907	0
1475	2.1037	181.97	121.219	2.2776	-0.0708	2332.923077	0.045551349	-0.0070824	20	0	9.9989	65.6914	0
1476	2.1038	181.67	121.155	2.2766	-0.0711	2329.128205	0.045532449	-0.007113	20	0	9.9993	65.6919	0
1477	2.1039	181.38	121.09	2.2757	-0.0715	2325.333333	0.045513549	-0.0071486	20	0	10.0002	65.6925	0
1478	2.104	181.1	121.026	2.2747	-0.0718	2321.74359	0.045493349	-0.0071778	20	0	10.0006	65.693	0
1479	2.1041	180.8	120.967	2.2737	-0.0721	2317.948718	0.045473199	-0.0072092	20	0	10.0014	65.6931	0
1480	2.1042	180.57	120.907	2.2729	-0.0724	2315	0.045457449	-0.00724	20	0	10.001	65.6921	0
1481	2.1043	180.27	120.846	2.2719	-0.0727	2311.205128	0.045437899	-0.0072724	20	0	10.0014	65.6913	0
1482	2.1043	180.03	120.791	2.2711	-0.073	2308.051282	0.045421549	-0.0072992	20	0	10.001	65.6907	0
1483	2.1044	179.8	120.734	2.2703	-0.0733	2305.102564	0.045405799	-0.0073292	20	0	10.0006	65.6902	0
1484	2.1045	179.55	120.681	2.2695	-0.0736	2301.923077	0.045389399	-0.007356	20	0	10.0006	65.6898	0
1485	2.1046	179.29	120.625	2.2686	-0.0738	2298.564103	0.045371749	-0.0073842	20	0	10.001	65.6895	0
1486	2.1047	179.07	120.571	2.2678	-0.0741	2295.820513	0.045355999	-0.007411	20	0	10.0006	65.6893	0
1487	2.1048	178.86	120.522	2.2671	-0.0744	2293.076923	0.045341499	-0.0074372	20	0	10.0006	65.689	0
1488	2.1049	178.63	120.471	2.2663	-0.0746	2290.128205	0.045325099	-0.0074648	20	0	10.0006	65.6887	0
1489	2.1049	178.42	120.422	2.2656	-0.0749	2287.384615	0.045312499	-0.0074884	20	0	9.9998	65.6886	0
1490	2.105	178.19	120.378	2.2649	-0.0751	2284.435897	0.045298649	-0.0075128	20	0	9.9993	65.6885	0
1491	2.1051	178.01	120.331	2.2642	-0.0754	2282.128205	0.045284799	-0.007538	20	0	9.9993	65.6886	0
1492	2.1052	177.81	120.289	2.2634	-0.0756	2279.589744	0.045268999	-0.0075602	20	0	10.0002	65.6886	0
1493	2.1053	177.63	120.244	2.2629	-0.0758	2277.282051	0.045258949	-0.007583	20	0	9.9998	65.6888	0
1494	2.1054	177.41	120.201	2.2622	-0.0761	2274.538462	0.045243799	-0.0076058	20	0	9.9993	65.6889	0
1495	2.1055	177.27	120.163	2.2617	-0.0762	2272.641026	0.045233099	-0.0076248	20	0	9.9993	65.6892	0
1496	2.1056	177.07	120.122	2.2611	-0.0765	2270.102564	0.045221749	-0.0076468	20	0	9.9998	65.6894	0
1497	2.1056	176.92	120.084	2.2605	-0.0767	2268.205128	0.045210399	-0.0076682	20	0	9.9993	65.6897	0
1498	2.1057	176.79	120.049	2.2599	-0.0769	2266.538462	0.045198449	-0.0076862	20	0	9.9989	65.6899	0
1499	2.1058	176.62	120.014	2.2594	-0.0771	2264.410256	0.045187749	-0.0077052	20	0	9.9998	65.6903	0
1500	2.1059	176.49	119.981	2.2589	-0.0772	2262.74359	0.045178899	-0.0077226	20	0	9.9989	65.6906	0
1501	2.106	176.33	119.948	2.2584	-0.0774	2260.615385	0.045167549	-0.0077414	20	0	9.9993	65.6912	0
1502	2.1062	176.12	119.888	2.2577	-0.0777	2257.897436	0.045153049	-0.0077746	20	0	9.9993	65.6917	0
1503	2.1063	175.97	119.86	2.2572	-0.0779	2256	0.045143599	-0.0077888	20	0	9.9998	65.6917	0
1504	2.1064	175.75	119.809	2.2563	-0.0782	2253.25641	0.045125949	-0.007818	20	0	10.0002	65.6918	0
1505	2.1066	175.57	119.762	2.2556	-0.0785	2250.923077	0.045112749	-0.0078456	20	0	10.0006	65.6921	0
1506	2.1068	175.41	119.722	2.255	-0.0787	2248.820513	0.045099499	-0.00787	20	0	10.0006	65.6923	0
1507	2.107	175.24	119.673	2.2541	-0.079	2246.717949	0.045081849	-0.0079	20	0	9.9998	65.6928	0
1508	2.1073	175.11	119.636	2.2534	-0.0793	2245.025641	0.045067999	-0.0079276	20	0	10.0006	65.6933	0
1509	2.1084	175.26	119.614	2.2525	-0.0798	2246.923077	0.045049699	-0.0079842	20	0	10.0006	65.6904	0
1510	2.1086	175.41	119.627	2.2525	-0.0799	2248.820513	0.045050349	-0.0079898	20	0	10.0006	65.6901	0
1511	2.1088	175.54	119.643	2.2525	-0.0799	2250.512821	0.045050349	-0.0079922	20	0	10.0002	65.6898	0
1512	2.1089	175.74	119.663	2.2525	-0.0799	2253.025641	0.045049699	-0.0079938	20	0	10.0006	65.6896	0
1513	2.109	175.84	119.674	2.2525	-0.0799	2254.307692	0.045049699	-0.0079946	20	0	10.0002	65.6896	0
1514	2.1091	175.97	119.685	2.2525	-0.08	2256	0.045049699	-0.0079954	20	0	10.0006	65.6895	0
1515	2.1093	176.2	119.71	2.2525	-0.08	2258.948718	0.045049699	-0.0079968	20	0	9.9993	65.6895	0
1516	2.1095	176.43	119.737	2.2524	-0.08	2261.897436	0.045048449	-0.0079976	20	0	9.9998	65.6897	0
1517	2.1095	176.59	119.752	2.2525	-0.08	2264	0.045050949	-0.0079976	20	0	10.0006	65.6898	0
1518	2.1096	176.72	119.766	2.2526	-0.08	2265.692308	0.045052249	-0.0079984	20	0	10.0006	65.6899	0
1519	2.1097	176.87	119.783	2.2526	-0.08	2267.589744	0.045052849	-0.0079976	20	0	9.9998	65.6899	0
1520	2.1098	177.04	119.799	2.2527	-0.08	2269.692308	0.045054099	-0.0079968	20	0	10.0002	65.6899	0
1521	2.1099	177.23	119.817	2.2526	-0.08	2272.205128	0.045052249	-0.0079976	20	0	9.9998	65.69	0
1522	2.11	177.41	119.835	2.2527	-0.08	2274.538462	0.045053499	-0.0079984	20	0	10.0002	65.6903	0
1523	2.1101	177.58	119.853	2.2528	-0.08	2276.641026	0.045055399	-0.0079976	20	0	9.9993	65.6903	0
1524	2.1102	177.76	119.873	2.2528	-0.08	2278.948718	0.045055999	-0.0079968	20	0	9.9998	65.6904	0
1525	2.1102	177.96	119.893	2.2529	-0.08	2281.487179	0.045057899	-0.0079954	20	0	9.9998	65.6908	0
1526	2.1103	178.17	119.914	2.253	-0.08	2284.230769	0.045060449	-0.0079962	20	0	9.9998	65.6911	0
1527	2.1104	178.37	119.935	2.253	-0.08	2286.769231	0.045060449	-0.0079962	20	0	9.9998	65.6911	0
1528	2.1105	178.58	119.957	2.2532	-0.08	2289.487179	0.045064849	-0.0079954	20	0	9.9998	65.6911	0
1529	2.1106	178.78	119.979	2.2533	-0.0799	2292.025641	0.045066749	-0.0079922	20	0	9.9998	65.6912	0
1530	2.1107	179.01	120.003	2.2533	-0.0799	2294.974359	0.045066749	-0.0079914	20	0	10.0002	65.6913	0
1531	2.1108	179.25	120.026	2.2536	-0.0799	2298.128205	0.045071149	-0.0079898	20	0	10.0006	65.6914	0
1532	2.1109	179.49	120.052	2.2537	-0.0799	2301.102564	0.045073649	-0.0079882	20	0	10.0002	65.6915	0
1533	2.1109	179.73	120.079	2.2538	-0.0799	2304.25641	0.045075549	-0.0079874	20	0	10.0002	65.6917	0
1534	2.111	179.98	120.104	2.2539	-0.0799	2307.410256	0.045078049	-0.0079858	20	0	10.0002	65.6918	0
1535	2.1111	180.24	120.132	2.2541	-0.0798	2310.794872	0.045081849	-0.0079842	20	0	10.0006	65.6918	0
1536	2.1112	180.5	120.16	2.2542	-0.0798	2314.153846	0.045084999	-0.0079812	20	0	10.0002	65.6924	0
1537	2.1113	180.78	120.188	2.2543	-0.0798	2317.74359	0.045086899	-0.0079804	20	0	10.0006	65.6923	0
1538	2.1114	181.05	120.219	2.2547	-0.0798	2321.102564	0.045093199	-0.0079788	20	0	10.0002	65.6923	0
1539	2.1115	181.33	120.248	2.2549	-0.0797	2324.692308	0.045097599	-0.0079748	20	0	10.0006	65.6923	0
1540	2.1115	181.62	120.279	2.2551	-0.0797	2328.487179	0.045101399	-0.007974	20	0	10.0006	65.6923	0
1541	2.1116	181.92	120.313	2.2553	-0.0797	2332.282051	0.045105149	-0.00797	20	0	9.9998	65.6923	0
1542	2.1117	182.21	120.346	2.2555	-0.0797	2336.076923	0.045109599	-0.0079654	20	0	10.0002	65.6923	0
1543	2.1118	182.54	120.382	2.2558	-0.0796	2340.282051	0.045115899	-0.0079622	20	0	10.0002	65.6929	0
1544	2.1119	182.84	120.418	2.2561	-0.0796	2344.076923	0.045122199	-0.0079574	20	0	9.9998	65.6926	0
1545	2.112	183.12	120.453	2.2563	-0.0796	2347.666667	0.045126599	-0.0079552	20	0	9.9998	65.6926	0
1546	2.1121	183.46	120.492	2.2567	-0.0795	2352.102564	0.045133549	-0.0079512	20	0	10.0002	65.6926	0
1547	2.1122	183.78	120.53	2.257	-0.0795	2356.102564	0.045140449	-0.0079464	20	0	9.9998	65.6926	0
1548	2.1122	184.12	120.573	2.2574	-0.0794	2360.512821	0.045147399	-0.0079402	20	0	10.0002	65.6928	0
1549	2.1123	184.45	120.617	2.2578	-0.0794	2364.74359	0.045156199	-0.0079354	20	0	10.0006	65.6931	0
1550	2.1124	184.78	120.66	2.2583	-0.0793	2368.948718	0.045165049	-0.0079276	20	0	9.9998	65.6932	0
1551	2.1125	185.16	120.707	2.2587	-0.0792	2373.794872	0.045173849	-0.007922	20	0	10.0002	65.6934	0
1552	2.1126	185.52	120.756	2.2591	-0.0791	2378.435897	0.045182049	-0.0079142	20	0	10.0006	65.6932	0
1553	2.1127	185.86	120.803	2.2598	-0.0791	2382.871795	0.045195299	-0.0079078	20	0	10.0006	65.6929	0
1554	2.1128	186.21	120.854	2.2603	-0.079	2387.282051	0.045205999	-0.0078984	20	0	10.0006	65.6926	0
1555	2.1128	186.59	120.904	2.2607	-0.0789	2392.128205	0.045213549	-0.0078904	20	0	10.0006	65.6924	0
1556	2.1129	186.96	120.958	2.2614	-0.0788	2396.974359	0.045228699	-0.0078818	20	0	10.001	65.6921	0
1557	2.113	187.36	121.015	2.2621	-0.0787	2402.051282	0.045242549	-0.0078708	20	0	10.0006	65.6918	0
1558	2.1131	187.75	121.07	2.2626	-0.0786	2407.102564	0.045252649	-0.0078612	20	0	9.9998	65.6914	0
1559	2.1132	188.12	121.13	2.2635	-0.0785	2411.74359	0.045270899	-0.0078502	20	0	10.0002	65.6911	0
1560	2.1133	188.48	121.189	2.2641	-0.0784	2416.384615	0.045282899	-0.0078392	20	0	10.001	65.6908	0
1561	2.1134	188.86	121.255	2.2649	-0.0782	2421.230769	0.045297399	-0.0078234	20	0	10.001	65.6905	0
1562	2.1135	189.3	121.329	2.266	-0.0781	2426.923077	0.045320699	-0.0078084	20	0	9.9998	65.6904	0
1563	2.1135	189.68	121.399	2.2669	-0.0779	2431.769231	0.045337699	-0.0077912	20	0	10.0002	65.6904	0
1564	2.1136	190.09	121.477	2.2678	-0.0777	2437.025641	0.045356599	-0.0077746	20	0	10.0006	65.6903	0
1565	2.1137	190.53	121.556	2.269	-0.0776	2442.717949	0.045380549	-0.0077564	20	0	10.001	65.6902	0
1566	2.1138	190.98	121.632	2.27	-0.0774	2448.410256	0.045400099	-0.007736	20	0	10.0002	65.69	0
1567	2.1139	191.4	121.714	2.2712	-0.0772	2453.897436	0.045424699	-0.007717	20	0	9.9998	65.6899	0
1568	2.114	191.85	121.796	2.2723	-0.077	2459.589744	0.045445499	-0.0076966	20	0	10.0014	65.6897	0
1569	2.1141	192.29	121.875	2.2733	-0.0768	2465.282051	0.045466899	-0.007676	20	0	10.001	65.6893	0
1570	2.1141	192.73	121.96	2.2745	-0.0765	2470.948718	0.045490849	-0.0076548	20	0	10.0006	65.6889	0
1571	2.1142	193.18	122.04	2.2757	-0.0764	2476.641026	0.045513549	-0.007635	20	0	10.0006	65.6885	0
1572	2.1143	193.67	122.128	2.2768	-0.0761	2482.974359	0.045536849	-0.0076122	20	0	10.0006	65.6885	0
1573	2.1144	194.12	122.216	2.2781	-0.0759	2488.666667	0.045562699	-0.0075878	20	0	10.0014	65.6885	0
1574	2.1145	194.61	122.3	2.2792	-0.0757	2495	0.045584099	-0.0075664	20	0	10.0002	65.6882	0
1575	2.1146	195.07	122.39	2.2805	-0.0754	2500.897436	0.045609949	-0.007542	20	0	10.001	65.6879	0
1576	2.1147	195.58	122.482	2.2818	-0.0752	2507.410256	0.045635149	-0.0075176	20	0	10.0002	65.6876	0
1577	2.1148	196.04	122.568	2.283	-0.0749	2513.333333	0.045659749	-0.007493	20	0	10.0006	65.6875	0
1578	2.1148	196.55	122.661	2.2842	-0.0747	2519.846154	0.045683699	-0.0074662	20	0	10.0006	65.6874	0
1579	2.1149	197.03	122.748	2.2853	-0.0744	2525.974359	0.045706999	-0.0074426	20	0	10.0002	65.6873	0
1580	2.115	197.54	122.844	2.2867	-0.0742	2532.512821	0.045733499	-0.007415	20	0	10.0006	65.6872	0
1581	2.1151	198.08	122.941	2.2881	-0.0739	2539.461538	0.045761849	-0.0073858	20	0	10.0014	65.6867	0
1582	2.1152	198.55	123.031	2.2894	-0.0736	2545.564103	0.045787049	-0.0073614	20	0	10.0014	65.6863	0
1583	2.1153	199.1	123.128	2.2907	-0.0733	2552.512821	0.045814749	-0.0073306	20	0	10.001	65.6859	0
1584	2.1154	199.64	123.227	2.292	-0.073	2559.487179	0.045840599	-0.007303	20	0	10.001	65.6855	0
1585	2.1155	200.12	123.32	2.2933	-0.0727	2565.589744	0.045865799	-0.0072746	20	0	10.0014	65.6853	0
1586	2.1155	200.66	123.419	2.2948	-0.0725	2572.538462	0.045895449	-0.0072456	20	0	10.0002	65.6849	0
1587	2.1156	201.18	123.515	2.2961	-0.0722	2579.282051	0.045921299	-0.0072164	20	0	10.0002	65.6848	0
1588	2.1157	201.74	123.616	2.2975	-0.0719	2586.461538	0.045949649	-0.0071856	20	0	10.0006	65.6846	0
1589	2.1158	202.27	123.719	2.2989	-0.0715	2593.205128	0.045977349	-0.007154	20	0	10.0002	65.6845	0
1590	2.1159	202.85	123.815	2.3003	-0.0712	2600.589744	0.046005699	-0.0071242	20	0	10.0006	65.6843	0
1591	2.116	203.39	123.92	2.3019	-0.0709	2607.538462	0.046037849	-0.0070926	20	0	10.001	65.684	0
1592	2.1161	203.95	124.024	2.3033	-0.0706	2614.692308	0.046066849	-0.0070602	20	0	10.001	65.6837	0
1593	2.1161	204.47	124.123	2.3047	-0.0703	2621.435897	0.046093949	-0.007028	20	0	10.0002	65.6835	0
1594	2.1162	205.06	124.23	2.3062	-0.0699	2629.025641	0.046124199	-0.0069924	19.99	0	10.0002	65.6835	0
1595	2.1163	205.59	124.33	2.3077	-0.0696	2635.769231	0.046154449	-0.0069616	20	0	10.0002	65.6835	0
1596	2.1164	206.18	124.438	2.3091	-0.0693	2643.358974	0.046182799	-0.0069254	20	0	9.9998	65.6835	0
1597	2.1165	206.79	124.547	2.3108	-0.0689	2651.153846	0.046215599	-0.00689	20	0	10.001	65.6834	0
1598	2.1166	207.32	124.65	2.3123	-0.0686	2657.897436	0.046245849	-0.006856	20	0	10.0006	65.6832	0
1599	2.1167	207.91	124.761	2.3138	-0.0682	2665.487179	0.046276099	-0.0068198	20	0	10.0006	65.683	0
1600	2.1168	208.52	124.872	2.3155	-0.0678	2673.282051	0.046309499	-0.0067804	20	0	10.0006	65.6826	0
1601	2.1168	209.08	124.978	2.3171	-0.0674	2680.461538	0.046342899	-0.0067448	20	0	10.0006	65.6823	0
1602	2.1169	209.7	125.091	2.3186	-0.0671	2688.461538	0.046372499	-0.0067062	20	0	10.0002	65.6821	0
1603	2.117	210.24	125.197	2.3202	-0.0667	2695.410256	0.046404649	-0.0066676	20	0	10.0006	65.6819	0
1604	2.1171	210.88	125.311	2.3219	-0.0663	2703.641026	0.046438649	-0.006629	20	0	10.0006	65.6819	0
1605	2.1172	211.48	125.425	2.3236	-0.0659	2711.230769	0.046472049	-0.0065896	20	0	10.0002	65.6817	0
1606	2.1173	212.05	125.534	2.3252	-0.0655	2718.589744	0.046504199	-0.006551	20	0	10.0002	65.6815	0
1607	2.1174	212.66	125.65	2.3268	-0.0651	2726.410256	0.046536999	-0.0065108	20	0	10.0002	65.6815	0
1608	2.1174	213.27	125.759	2.3284	-0.0647	2734.205128	0.046568499	-0.0064712	20	0	10.0002	65.6813	0
1609	2.1175	213.88	125.877	2.3303	-0.0643	2742	0.046606299	-0.0064288	20	0	10.0002	65.6811	0
1610	2.1176	214.52	125.995	2.332	-0.0639	2750.205128	0.046639049	-0.0063878	20	0	10.0006	65.6811	0
1611	2.1177	215.16	126.107	2.3336	-0.0635	2758.435897	0.046672449	-0.0063468	20	0	10.0006	65.681	0
1612	2.1178	215.78	126.225	2.3355	-0.0631	2766.435897	0.046709049	-0.006305	20	0	10.0002	65.6808	0
1613	2.1179	216.41	126.344	2.3372	-0.0626	2774.461538	0.046743699	-0.0062608	20	0	10.0002	65.6808	0
1614	2.118	217.02	126.457	2.3388	-0.0622	2782.25641	0.046776449	-0.0062182	20	0	10.0006	65.6808	0
1615	2.1181	217.66	126.577	2.3407	-0.0617	2790.461538	0.046814249	-0.0061724	20	0	10.0006	65.6806	0
1616	2.1181	218.3	126.699	2.3425	-0.0613	2798.692308	0.046849549	-0.0061276	20	0	10.0006	65.6804	0
1617	2.1182	218.94	126.814	2.3442	-0.0609	2806.897436	0.046883599	-0.006085	20	0	10.0006	65.6802	0
1618	2.1183	219.55	126.937	2.3459	-0.0604	2814.717949	0.046918899	-0.0060368	19.99	0	10.001	65.68	0
1619	2.1184	220.16	127.053	2.3476	-0.0599	2822.512821	0.046952899	-0.0059942	19.99	0	10.001	65.6798	0
1620	2.1185	220.85	127.177	2.3496	-0.0595	2831.358974	0.046992599	-0.005947	20	0	10.0002	65.6797	0
1621	2.1186	221.52	127.301	2.3514	-0.059	2840	0.047027299	-0.0058982	19.99	0	10.001	65.6796	0
1622	2.1187	222.13	127.417	2.3531	-0.0585	2847.794872	0.047062549	-0.0058516	20	0	10.0002	65.6795	0
1623	2.1187	222.82	127.542	2.355	-0.058	2856.641026	0.047100399	-0.0058034	20	0	10.001	65.6792	0
1624	2.1188	223.46	127.667	2.3568	-0.0575	2864.871795	0.047136949	-0.0057546	20	0	10.0002	65.679	0
1625	2.1189	224.1	127.785	2.3586	-0.0571	2873.076923	0.047172849	-0.0057074	20	0	9.9998	65.6788	0
1626	2.119	224.77	127.913	2.3607	-0.0566	2881.717949	0.047213199	-0.005656	20	0	10.0006	65.6788	0
1627	2.1191	225.38	128.031	2.3624	-0.0561	2889.512821	0.047247849	-0.0056096	20	0	10.0006	65.6788	0
1628	2.1192	226.06	128.158	2.3643	-0.0556	2898.153846	0.047286299	-0.0055576	20	0	10.0002	65.6788	0
1629	2.1193	226.73	128.287	2.3664	-0.055	2906.794872	0.047327249	-0.0055046	20	0	10.0002	65.6788	0
1630	2.1194	227.4	128.408	2.3682	-0.0546	2915.435897	0.047364449	-0.0054566	20	0	10.0006	65.6787	0
1631	2.1194	228.06	128.534	2.3702	-0.054	2923.871795	0.047404149	-0.0054038	19.99	0	10.0006	65.6785	0
1632	2.1195	228.75	128.664	2.3722	-0.0535	2932.717949	0.047443199	-0.0053502	20	0	10.0002	65.6783	0
1633	2.1196	229.39	128.785	2.3739	-0.053	2940.948718	0.047478499	-0.005299	20	0	10.0002	65.6781	0
1634	2.1197	230.08	128.914	2.3759	-0.0525	2949.794872	0.047518849	-0.0052484	20	0	10.0002	65.6779	0
1635	2.1198	230.73	129.035	2.3779	-0.052	2958.025641	0.047558549	-0.0051956	20	0	10.0002	65.6778	0
1636	2.1199	231.42	129.165	2.3798	-0.0514	2966.871795	0.047596999	-0.0051412	20	0	10.0002	65.6778	0
1637	2.12	232.11	129.295	2.3819	-0.0509	2975.717949	0.047637299	-0.0050852	20	0	10.0006	65.6776	0
1638	2.1201	232.75	129.417	2.3837	-0.0504	2983.948718	0.047674499	-0.0050364	20	0	10.0006	65.6776	0
1639	2.1201	233.45	129.548	2.3858	-0.0498	2993	0.047716699	-0.0049788	20	0	10.0002	65.6775	0
1640	2.1202	234.15	129.679	2.3878	-0.0492	3001.871795	0.047755799	-0.0049244	20	0	10.0006	65.6775	0
1641	2.1203	234.79	129.802	2.3896	-0.0487	3010.076923	0.047791699	-0.0048724	20	0	9.9998	65.6775	0
1642	2.1204	235.48	129.934	2.3918	-0.0481	3018.923077	0.047835799	-0.0048148	20	0	9.9993	65.6775	0
1643	2.1205	236.13	130.058	2.3938	-0.0476	3027.358974	0.047875499	-0.0047644	20	0	10.0002	65.6777	0
1644	2.1206	236.84	130.19	2.3958	-0.0471	3036.435897	0.047915249	-0.0047068	20	0	10.0002	65.6777	0
1645	2.1207	237.55	130.322	2.398	-0.0465	3045.487179	0.047959349	-0.0046492	20	0	10.0006	65.6778	0
1646	2.1207	238.19	130.446	2.3999	-0.046	3053.717949	0.047997149	-0.0045964	20	0	10.0002	65.6778	0
1647	2.1208	238.91	130.579	2.4018	-0.0454	3062.974359	0.048036849	-0.0045388	20	0	10.001	65.6777	0
1648	2.1209	239.6	130.711	2.404	-0.0448	3071.820513	0.048080349	-0.004482	20	0	10.0002	65.6776	0
1649	2.121	240.26	130.835	2.4059	-0.0443	3080.25641	0.048118799	-0.004427	20	0	10.001	65.6774	0
1650	2.1211	240.95	130.967	2.4079	-0.0437	3089.102564	0.048158499	-0.0043686	20	0	10.0006	65.6768	0
1651	2.1212	241.61	131.092	2.4101	-0.0431	3097.538462	0.048202599	-0.0043142	19.99	0	9.9998	65.6768	0
1652	2.1213	242.33	131.223	2.4121	-0.0425	3106.820513	0.048242299	-0.0042542	20	0	10.0002	65.6768	0
1653	2.1214	243.02	131.356	2.4143	-0.042	3115.666667	0.048285799	-0.0041974	20	0	9.9993	65.677	0
1654	2.1214	243.66	131.48	2.4163	-0.0414	3123.897436	0.048326099	-0.0041414	20	0	10.0002	65.6772	0
1655	2.1215	244.39	131.612	2.4184	-0.0408	3133.153846	0.048367699	-0.0040832	20	0	10.0002	65.6774	0
1656	2.1216	245.08	131.744	2.4206	-0.0402	3142	0.048411199	-0.0040224	20	0	9.9998	65.6774	0
1657	2.1217	245.73	131.869	2.4226	-0.0397	3150.435897	0.048452799	-0.0039672	20	0	10.0006	65.6775	0
1658	2.1218	246.44	132.002	2.4246	-0.0391	3159.512821	0.048491249	-0.0039066	20	0	10.0002	65.6775	0
1659	2.1219	247.1	132.126	2.4266	-0.0385	3167.923077	0.048532799	-0.0038514	20	0	10.001	65.6775	0
1660	2.122	247.77	132.26	2.4288	-0.0379	3176.564103	0.048576299	-0.0037922	20	0	9.9998	65.6774	0
1661	2.122	248.5	132.393	2.431	-0.0373	3185.846154	0.048619149	-0.0037324	20	0	10.0006	65.6772	0
1662	2.1221	249.15	132.518	2.4329	-0.0367	3194.282051	0.048658849	-0.003674	20	0	10.0002	65.6768	0
1663	2.1222	249.86	132.651	2.4351	-0.0361	3203.333333	0.048702949	-0.0036148	20	0	10.0006	65.6762	0
1664	2.1223	250.52	132.776	2.4371	-0.0356	3211.769231	0.048742699	-0.003558	19.99	0	9.9998	65.6759	0
1665	2.1224	251.19	132.909	2.4393	-0.035	3220.410256	0.048785549	-0.0034982	20	0	10.0002	65.6759	0
1666	2.1225	251.92	133.042	2.4414	-0.0344	3229.692308	0.048827749	-0.0034358	20	0	10.0002	65.6761	0
1667	2.1226	252.57	133.167	2.4434	-0.0338	3238.128205	0.048868699	-0.0033784	20	0	10.0006	65.6763	0
1668	2.1227	253.28	133.299	2.4455	-0.0332	3247.179487	0.048910949	-0.00332	20	0	9.9998	65.6767	0
1669	2.1227	253.97	133.433	2.4477	-0.0326	3256.025641	0.048954399	-0.0032576	20	0	10.0002	65.6769	0
1670	2.1228	254.63	133.557	2.4498	-0.032	3264.461538	0.048995999	-0.003201	20	0	9.9993	65.6772	0
1671	2.1229	255.33	133.689	2.4518	-0.0314	3273.512821	0.049036349	-0.0031394	20	0	9.9998	65.6775	0
1672	2.123	255.96	133.813	2.4539	-0.0308	3281.538462	0.049077299	-0.0030826	20	0	9.9998	65.6775	0
1673	2.1231	256.67	133.945	2.456	-0.0302	3290.589744	0.049120799	-0.003022	20	0	9.9993	65.6775	0
1674	2.1232	257.36	134.077	2.4582	-0.0296	3299.435897	0.049164299	-0.002962	20	0	9.9993	65.6776	0
1675	2.1233	258.01	134.201	2.4603	-0.029	3307.871795	0.049205849	-0.0029028	20	0	10.0006	65.6777	0
1676	2.1234	258.69	134.332	2.4624	-0.0284	3316.512821	0.049247449	-0.0028414	20	0	10.0002	65.6779	0
1677	2.1234	259.41	134.463	2.4645	-0.0278	3325.794872	0.049290949	-0.0027806	20	0	10.0002	65.6779	0
1678	2.1235	260.02	134.585	2.4667	-0.0272	3333.589744	0.049334449	-0.0027232	19.99	0	10.0006	65.6778	0
1679	2.1236	260.73	134.716	2.4688	-0.0266	3342.641026	0.049376649	-0.0026632	20	0	10.0002	65.6776	0
1680	2.1237	261.4	134.847	2.4709	-0.026	3351.282051	0.049418249	-0.0026024	19.99	0	10.0006	65.6773	0
1681	2.1238	262.06	134.968	2.4729	-0.0255	3359.717949	0.049457949	-0.0025458	20	0	10.0006	65.6769	0
1682	2.1239	262.72	135.099	2.4751	-0.0248	3368.153846	0.049502049	-0.0024826	20	0	10.0006	65.6763	0
1683	2.124	263.37	135.221	2.4772	-0.0243	3376.589744	0.049543649	-0.0024258	20	0	10.001	65.6759	0
1684	2.124	264.03	135.349	2.4793	-0.0236	3385.025641	0.049585899	-0.0023636	20	0	10.0002	65.6754	0
1685	2.1241	264.71	135.479	2.4816	-0.023	3393.666667	0.049631249	-0.0023028	20	0	9.9998	65.6751	0
1686	2.1242	265.35	135.6	2.4835	-0.0225	3401.871795	0.049669049	-0.0022454	20	0	9.9993	65.6752	0
1687	2.1243	266	135.727	2.4856	-0.0218	3410.307692	0.049711899	-0.0021838	20	0	9.9998	65.6752	0
1688	2.1244	266.63	135.847	2.4875	-0.0213	3418.307692	0.049750349	-0.002127	20	0	10.0002	65.6755	0
1689	2.1245	267.32	135.973	2.4897	-0.0207	3427.179487	0.049794499	-0.0020672	20	0	9.9998	65.6758	0
1690	2.1246	267.98	136.1	2.492	-0.0201	3435.589744	0.049839849	-0.0020064	20	0	9.9998	65.6759	0
1691	2.1247	268.62	136.218	2.4939	-0.0195	3443.820513	0.049877649	-0.0019488	20	0	10.0002	65.6761	0
1692	2.1247	269.29	136.345	2.496	-0.0189	3452.461538	0.049919249	-0.0018874	20	0	9.9989	65.6763	0
1693	2.1248	269.92	136.471	2.4981	-0.0183	3460.461538	0.049962749	-0.0018282	20	0	9.9998	65.6764	0
1694	2.1249	270.51	136.587	2.5001	-0.0177	3468.051282	0.050001199	-0.0017714	20	0	10.0006	65.6764	0
1695	2.125	271.18	136.712	2.5022	-0.0171	3476.692308	0.050044049	-0.0017116	20	0	10.0006	65.6763	0
1696	2.1251	271.84	136.837	2.5043	-0.0165	3485.128205	0.050086899	-0.00165	20	0	10.0006	65.6761	0
1697	2.1252	272.45	136.954	2.5062	-0.0159	3492.923077	0.050124049	-0.001594	20	0	10.0006	65.6758	0
1698	2.1253	273.11	137.078	2.5083	-0.0153	3501.358974	0.050166899	-0.0015342	20	0	10.0006	65.6754	0
1699	2.1253	273.68	137.193	2.5103	-0.0148	3508.717949	0.050206649	-0.0014774	20	0	10.0014	65.6749	0
1700	2.1254	274.34	137.316	2.5123	-0.0142	3517.153846	0.050246949	-0.001419	20	0	10.0006	65.6744	0
1701	2.1255	274.98	137.439	2.5145	-0.0136	3525.384615	0.050289799	-0.00136	20	0	10.0002	65.6742	0
1702	2.1256	275.57	137.553	2.5164	-0.013	3532.974359	0.050328249	-0.001304	20	0	10.0002	65.6743	0
1703	2.1257	276.2	137.675	2.5184	-0.0125	3540.974359	0.050368599	-0.0012456	20	0	9.9993	65.6744	0
1704	2.1258	276.8	137.787	2.5204	-0.0119	3548.769231	0.050408899	-0.0011904	20	0	10.0002	65.6745	0
1705	2.1259	277.41	137.908	2.5225	-0.0113	3556.564103	0.050449899	-0.0011328	20	0	9.9998	65.6746	0
1706	2.126	278	138.027	2.5245	-0.0107	3564.153846	0.050490199	-0.0010738	20	0	10.0002	65.6749	0
1707	2.126	278.6	138.139	2.5265	-0.0102	3571.74359	0.050529899	-0.0010186	20	0	9.9998	65.6752	0
1708	2.1261	279.24	138.257	2.5284	-0.0096	3579.974359	0.050568999	-0.000961	20	0	10.0002	65.6752	0
1709	2.1262	279.83	138.375	2.5305	-0.009	3587.564103	0.050609299	-0.0009034	20	0	9.9993	65.6755	0
1710	2.1263	280.39	138.485	2.5324	-0.0085	3594.717949	0.050647149	-0.000849	20	0	9.9998	65.6755	0
1711	2.1264	281.01	138.601	2.5343	-0.0079	3602.717949	0.050685599	-0.0007914	20	0	10.0006	65.6758	0
1712	2.1265	281.59	138.71	2.5364	-0.0074	3610.102564	0.050727149	-0.000737	20	0	10.0002	65.6758	0
1713	2.1266	282.16	138.825	2.5382	-0.0068	3617.487179	0.050764999	-0.0006796	20	0	10.001	65.6757	0
1714	2.1266	282.76	138.94	2.5403	-0.0062	3625.076923	0.050805299	-0.0006212	20	0	10.0006	65.6754	0
1715	2.1267	283.31	139.048	2.5421	-0.0057	3632.230769	0.050842499	-0.00057	20	0	10.001	65.6752	0
1716	2.1268	283.91	139.162	2.5441	-0.0051	3639.820513	0.050882199	-0.000514	20	0	10.001	65.6747	0
1717	2.1269	284.51	139.274	2.546	-0.0046	3647.615385	0.050920649	-0.0004572	20	0	10.001	65.6743	0
1718	2.127	285.01	139.379	2.548	-0.004	3653.948718	0.050959699	-0.0004028	20	0	10.001	65.6738	0
1719	2.1271	285.6	139.49	2.5497	-0.0035	3661.538462	0.050994999	-0.0003492	20	0	10.0002	65.6734	0
1720	2.1272	286.19	139.601	2.5517	-0.0029	3669.128205	0.051034099	-0.0002924	20	0	10.0002	65.6734	0
1721	2.1273	286.68	139.703	2.5536	-0.0024	3675.435897	0.051071249	-0.0002412	20	0	9.9993	65.6734	0
1722	2.1273	287.28	139.812	2.5554	-0.0019	3683.025641	0.051107199	-0.0001876	20	0	9.9998	65.6734	0
1723	2.1274	287.8	139.913	2.5572	-0.0014	3689.769231	0.051143749	-0.0001378	20	0	10.0002	65.6737	0
1724	2.1275	288.34	140.021	2.5591	-0.0008	3696.717949	0.051181549	-8.26E-05	20	0	9.9989	65.6738	0
1725	2.1276	288.92	140.127	2.5608	-0.0003	3704.102564	0.051215599	-2.90E-05	20	0	9.9998	65.674	0
1726	2.1277	289.41	140.227	2.5626	0.0002	3710.435897	0.051252749	2.12E-05	20	0	9.9993	65.6741	0
1727	2.1278	289.96	140.332	2.5645	0.0007	3717.384615	0.051290549	7.16E-05	20	0	10.0002	65.6741	0
1728	2.1279	290.43	140.429	2.5663	0.0012	3723.487179	0.051325249	0.0001222	20	0	10.0006	65.6744	0
1729	2.128	290.99	140.533	2.5682	0.0018	3730.666667	0.051363049	0.000175	20	0	10.0002	65.6743	0
1730	2.128	291.52	140.636	2.5699	0.0023	3737.410256	0.051398349	0.0002278	20	0	10.0006	65.6742	0
1731	2.1281	291.99	140.731	2.5716	0.0028	3743.512821	0.051432999	0.000275	20	0	10.0002	65.674	0
1732	2.1282	292.5	140.833	2.5735	0.0033	3750.051282	0.051470799	0.000327	20	0	9.9998	65.6738	0
1733	2.1283	293.03	140.934	2.5752	0.0038	3756.794872	0.051504849	0.0003784	20	0	10.001	65.6736	0
1734	2.1284	293.52	141.027	2.5769	0.0043	3763.102564	0.051538249	0.0004256	20	0	10.0002	65.6732	0
1735	2.1285	294	141.125	2.5787	0.0048	3769.230769	0.051573549	0.0004762	20	0	10.001	65.6729	0
1736	2.1286	294.51	141.223	2.5805	0.0053	3775.769231	0.051609449	0.0005266	20	0	10.0002	65.6727	0
1737	2.1286	294.99	141.315	2.5821	0.0057	3781.871795	0.051641599	0.000573	20	0	10.0002	65.6728	0
1738	2.1287	295.48	141.41	2.5837	0.0062	3788.205128	0.051673749	0.000622	20	0	9.9993	65.6731	0
1739	2.1288	295.91	141.5	2.5852	0.0067	3793.666667	0.051704599	0.0006684	20	0	10.0002	65.6734	0
1740	2.1289	296.38	141.594	2.5871	0.0072	3799.794872	0.051741799	0.000719	20	0	10.0006	65.6736	0
1741	2.129	296.86	141.688	2.5887	0.0077	3805.897436	0.051773949	0.0007686	20	0	9.9998	65.6739	0
1742	2.1291	297.32	141.774	2.5903	0.0081	3811.794872	0.051805449	0.000812	20	0	10.0002	65.6741	0
1743	2.1292	297.78	141.867	2.5919	0.0086	3817.692308	0.051838849	0.0008608	20	0	9.9993	65.6742	0
1744	2.1293	298.22	141.952	2.5934	0.009	3823.384615	0.051868449	0.0009042	20	0	10.0002	65.6743	0
1745	2.1293	298.65	142.042	2.5951	0.0095	3828.871795	0.051901849	0.0009508	20	0	9.9998	65.6746	0
1746	2.1294	299.11	142.132	2.5967	0.01	3834.769231	0.051933349	0.0009988	20	0	10.0002	65.6747	0
1747	2.1295	299.54	142.215	2.5982	0.0104	3840.25641	0.051964249	0.0010422	20	0	10.0002	65.6747	0
1748	2.1296	299.97	142.303	2.5998	0.0109	3845.74359	0.051995749	0.0010896	20	0	10.0002	65.6751	0
1749	2.1297	300.39	142.389	2.6014	0.0113	3851.205128	0.052027249	0.0011336	20	0	10.0002	65.6751	0
1750	2.1298	300.79	142.47	2.6029	0.0118	3856.282051	0.052057499	0.0011762	20	0	10.0006	65.6753	0
1751	2.1299	301.2	142.555	2.6044	0.0122	3861.538462	0.052088399	0.001222	20	0	9.9998	65.6753	0
1752	2.1299	301.63	142.639	2.6059	0.0127	3867.025641	0.052118649	0.0012662	20	0	10.0002	65.6752	0
1753	2.13	302.01	142.716	2.6074	0.0131	3871.871795	0.052148899	0.0013072	20	0	10.0002	65.6751	0
1754	2.1301	302.4	142.798	2.6089	0.0135	3876.923077	0.052178499	0.0013528	20	0	10.001	65.6749	0
1755	2.1302	302.79	142.873	2.6102	0.0139	3881.974359	0.052204999	0.0013922	20	0	10.0006	65.6747	0
1756	2.1303	303.17	142.953	2.6117	0.0144	3886.820513	0.052234599	0.0014364	20	0	10.0006	65.6743	0
1757	2.1304	303.57	143.031	2.6132	0.0148	3891.897436	0.052264849	0.0014782	20	0	10.0014	65.6738	0
1758	2.1305	303.95	143.105	2.6145	0.0152	3896.74359	0.052290699	0.00152	20	0	10.0006	65.6732	0
1759	2.1306	304.29	143.182	2.6161	0.0156	3901.153846	0.052321549	0.0015618	20	0	10.0014	65.6727	0
1760	2.1306	304.69	143.258	2.6174	0.0161	3906.230769	0.052348649	0.0016052	20	0	10.0002	65.6724	0
1761	2.1307	305.01	143.328	2.6187	0.0164	3910.435897	0.052373899	0.0016438	20	0	9.9998	65.6722	0
1762	2.1308	305.38	143.402	2.6201	0.0168	3915.076923	0.052402849	0.001684	20	0	10.0002	65.6722	0
1763	2.1309	305.7	143.471	2.6214	0.0172	3919.282051	0.052428699	0.0017218	20	0	9.9993	65.6723	0
1764	2.131	306.05	143.543	2.6228	0.0176	3923.717949	0.052456449	0.0017636	20	0	9.9998	65.6725	0
1765	2.1311	306.39	143.613	2.6242	0.018	3928.128205	0.052484149	0.0018022	20	0	10.0006	65.6725	0
1766	2.1312	306.69	143.679	2.6254	0.0184	3931.923077	0.052508099	0.0018392	20	0	9.9998	65.6725	0
1767	2.1312	307.02	143.746	2.6267	0.0188	3936.153846	0.052533299	0.0018802	20	0	9.9998	65.6726	0
1768	2.1313	307.35	143.814	2.6281	0.0192	3940.358974	0.052562299	0.0019174	20	0	10.0006	65.6728	0
1769	2.1314	307.63	143.876	2.6292	0.0195	3943.948718	0.052584349	0.0019544	20	0	10.0002	65.673	0
1770	2.1315	307.94	143.942	2.6305	0.0199	3947.948718	0.052609549	0.0019906	20	0	10.0006	65.673	0
1771	2.1316	308.24	144.003	2.6317	0.0203	3951.74359	0.052634149	0.002027	20	0	9.9998	65.673	0
1772	2.1317	308.53	144.066	2.6329	0.0206	3955.538462	0.052658099	0.0020624	20	0	10.0006	65.673	0
1773	2.1318	308.83	144.128	2.6341	0.021	3959.333333	0.052682049	0.0021002	20	0	10.001	65.6729	0
1774	2.1319	309.09	144.186	2.6352	0.0213	3962.692308	0.052703449	0.0021326	20	0	10.0002	65.6728	0
1775	2.1319	309.39	144.246	2.6364	0.0217	3966.487179	0.052728049	0.0021688	20	0	10.0002	65.6726	0
1776	2.132	309.6	144.302	2.6375	0.022	3969.230769	0.052750749	0.002202	20	0	10.0002	65.6724	0
1777	2.1321	309.9	144.359	2.6387	0.0224	3973.025641	0.052773449	0.0022366	20	0	10.0002	65.6724	0
1778	2.1322	310.14	144.416	2.6397	0.0227	3976.179487	0.052794849	0.0022706	20	0	10.0002	65.6721	0
1779	2.1323	310.39	144.469	2.6409	0.023	3979.358974	0.052818149	0.0023028	20	0	10.0006	65.6718	0
1780	2.1324	310.62	144.523	2.642	0.0234	3982.307692	0.052840249	0.0023352	20	0	10.0002	65.6716	0
1781	2.1325	310.85	144.577	2.6429	0.0237	3985.25641	0.052858499	0.0023676	20	0	9.9998	65.6715	0
1782	2.1326	311.08	144.626	2.6439	0.024	3988.205128	0.052878649	0.002399	20	0	9.9998	65.6714	0
1783	2.1326	311.29	144.677	2.645	0.0243	3990.948718	0.052900099	0.002429	20	0	9.9998	65.6714	0
1784	2.1327	311.52	144.723	2.6458	0.0246	3993.897436	0.052915849	0.0024582	20	0	10.0002	65.6714	0
1785	2.1328	311.72	144.771	2.6469	0.0249	3996.410256	0.052937299	0.002489	20	0	10.0006	65.6715	0
1786	2.1329	311.93	144.819	2.6478	0.0252	3999.153846	0.052955549	0.0025182	20	0	10.0002	65.6718	0
1787	2.133	312.15	144.863	2.6487	0.0255	4001.897436	0.052973849	0.0025474	20	0	9.9998	65.6718	0
1788	2.1331	312.3	144.908	2.6496	0.0258	4003.794872	0.052991449	0.0025756	20	0	9.9998	65.6721	0
1789	2.1332	312.53	144.952	2.6505	0.026	4006.74359	0.053009749	0.002604	20	0	9.9989	65.6726	0
1790	2.1332	312.66	144.992	2.6513	0.0263	4008.435897	0.053026149	0.0026292	20	0	9.9998	65.6731	0
1791	2.1333	312.87	145.034	2.6522	0.0266	4011.179487	0.053043149	0.0026562	20	0	9.9998	65.6736	0
1792	2.1334	313	145.073	2.6529	0.0268	4012.871795	0.053058299	0.0026836	20	0	9.9998	65.6738	0
1793	2.1335	313.15	145.111	2.6537	0.0271	4014.769231	0.053074049	0.002709	20	0	10.0002	65.6742	0
1794	2.1336	313.33	145.148	2.6545	0.0273	4017.076923	0.053090399	0.0027342	20	0	10.0002	65.6742	0
1795	2.1337	313.45	145.182	2.6551	0.0276	4018.564103	0.053102999	0.0027586	20	0	9.9998	65.6742	0
1796	2.1338	313.6	145.219	2.6559	0.0278	4020.461538	0.053118149	0.0027814	20	0	9.9998	65.6742	0
1797	2.1339	313.73	145.253	2.6567	0.0281	4022.128205	0.053133249	0.0028052	20	0	10.0006	65.6743	0
1798	2.1339	313.84	145.283	2.6574	0.0283	4023.615385	0.053147149	0.0028264	20	0	10.0006	65.6742	0
1799	2.134	313.97	145.314	2.658	0.0285	4025.307692	0.053159099	0.0028492	20	0	10.001	65.6741	0
1800	2.1341	314.09	145.344	2.6586	0.0287	4026.769231	0.053171699	0.002869	20	0	10.0006	65.6739	0
1801	2.1343	314.25	145.398	2.6597	0.0291	4028.871795	0.053194399	0.00291	20	0	10.0002	65.6736	0
1802	2.1344	314.35	145.423	2.6603	0.0293	4030.153846	0.053205749	0.0029282	20	0	10.0006	65.6734	0
1803	2.1345	314.53	145.472	2.6614	0.0296	4032.461538	0.053228449	0.0029644	20	0	10.0006	65.6727	0
1804	2.1347	314.68	145.514	2.6625	0.03	4034.358974	0.053249249	0.002996	20	0	10.001	65.6721	0
1805	2.135	314.81	145.568	2.6637	0.0304	4036.051282	0.053273799	0.0030408	20	0	9.9998	65.6714	0
1806	2.1352	314.93	145.611	2.6648	0.0308	4037.512821	0.053295249	0.003081	20	0	10.0006	65.671	0
1807	2.1359	314.81	145.669	2.6666	0.0315	4036.051282	0.053331149	0.0031536	20	0	9.9998	65.6714	0
1808	2.1361	314.7	145.671	2.6667	0.0317	4034.564103	0.053334949	0.0031686	20	0	9.9998	65.6719	0
1809	2.1364	314.56	145.665	2.6671	0.0318	4032.871795	0.053341249	0.0031844	20	0	9.9993	65.6729	0
1810	2.1365	314.38	145.655	2.6672	0.0319	4030.564103	0.053343749	0.0031922	20	0	10.0006	65.6732	0
1811	2.1367	314.2	145.642	2.6672	0.032	4028.25641	0.053344999	0.0031986	20	0	10.0002	65.6735	0
1812	2.1368	314.1	145.634	2.6672	0.032	4026.974359	0.053344999	0.003201	20	0	10.0006	65.6738	0
1813	2.137	313.89	145.616	2.6672	0.0321	4024.230769	0.053343749	0.0032056	20	0	9.9989	65.6738	0
1814	2.1371	313.78	145.607	2.6673	0.0321	4022.769231	0.053346299	0.0032088	20	0	9.9998	65.6741	0
1815	2.1372	313.63	145.597	2.6673	0.0321	4020.871795	0.053346299	0.0032104	20	0	10.0006	65.6745	0
1816	2.1372	313.5	145.585	2.6673	0.0321	4019.179487	0.053345649	0.0032128	20	0	10.0006	65.6747	0
1817	2.1373	313.35	145.575	2.6673	0.0322	4017.282051	0.053345649	0.0032158	20	0	9.9998	65.6748	0
1818	2.1374	313.22	145.563	2.6672	0.0322	4015.589744	0.053343749	0.0032174	20	0	10.0002	65.6748	0
1819	2.1375	313.05	145.552	2.6673	0.0322	4013.487179	0.053346299	0.0032182	20	0	10.0002	65.6748	0
1820	2.1376	312.87	145.54	2.6672	0.0322	4011.179487	0.053344999	0.0032198	20	0	9.9993	65.6748	0
1821	2.1377	312.69	145.526	2.6672	0.0322	4008.846154	0.053344999	0.0032198	20	0	9.9998	65.6748	0
1822	2.1378	312.53	145.513	2.6672	0.0322	4006.74359	0.053344399	0.0032214	20	0	10.0002	65.6748	0
1823	2.1378	312.36	145.498	2.6672	0.0322	4004.641026	0.053344399	0.003223	20	0	10.0006	65.6747	0
1824	2.1379	312.15	145.484	2.6672	0.0322	4001.897436	0.053344999	0.003223	20	0	10.0002	65.6746	0
1825	2.138	311.95	145.468	2.6672	0.0323	3999.384615	0.053343149	0.0032254	20	0	9.9998	65.6745	0
1826	2.1381	311.74	145.453	2.6671	0.0323	3996.641026	0.053342499	0.0032254	20	0	10.0002	65.6745	0
1827	2.1382	311.54	145.437	2.6671	0.0322	3994.102564	0.053341249	0.0032246	20	0	9.9998	65.6744	0
1828	2.1383	311.34	145.42	2.6671	0.0323	3991.564103	0.053342499	0.0032262	20	0	10.0006	65.6744	0
1829	2.1384	311.1	145.402	2.6671	0.0322	3988.410256	0.053341849	0.0032246	20	0	10.0006	65.6744	0
1830	2.1385	310.85	145.383	2.667	0.0322	3985.25641	0.053339949	0.003223	20	0	10.0006	65.6743	0
1831	2.1385	310.65	145.365	2.6671	0.0322	3982.717949	0.053341249	0.0032246	20	0	10.001	65.6743	0
1832	2.1386	310.42	145.346	2.6669	0.0322	3979.769231	0.053338099	0.0032246	20	0	10.0002	65.6743	0
1833	2.1387	310.16	145.325	2.6668	0.0322	3976.410256	0.053336799	0.0032238	20	0	10.0002	65.6743	0
1834	2.1388	309.9	145.306	2.6667	0.0322	3973.025641	0.053334299	0.0032222	20	0	10.0002	65.6743	0
1835	2.1389	309.63	145.283	2.6667	0.0322	3969.666667	0.053333049	0.0032214	20	0	9.9998	65.6742	0
1836	2.139	309.39	145.263	2.6664	0.0322	3966.487179	0.053328649	0.0032198	20	0	9.9993	65.6742	0
1837	2.1391	309.09	145.24	2.6664	0.0322	3962.692308	0.053327999	0.0032198	20	0	10.0002	65.6741	0
1838	2.1391	308.83	145.217	2.6663	0.0322	3959.333333	0.053325499	0.0032166	20	0	9.9998	65.6741	0
1839	2.1392	308.53	145.194	2.6661	0.0322	3955.538462	0.053321049	0.0032158	20	0	10.0002	65.6741	0
1840	2.1393	308.27	145.168	2.6661	0.0322	3952.153846	0.053321699	0.0032158	20	0	10.0002	65.674	0
1841	2.1394	307.97	145.141	2.6658	0.0321	3948.358974	0.053315399	0.0032128	20	0	10.0006	65.6739	0
1842	2.1395	307.61	145.116	2.6656	0.0321	3943.74359	0.053311599	0.0032112	20	0	10.0006	65.6737	0
1843	2.1396	307.35	145.088	2.6653	0.0321	3940.358974	0.053306549	0.0032088	20	0	10.0002	65.6735	0
1844	2.1397	307.02	145.06	2.6652	0.0321	3936.153846	0.053304699	0.0032072	20	0	9.9998	65.6733	0
1845	2.1398	306.71	145.033	2.6649	0.032	3932.153846	0.053297749	0.003204	20	0	10.0006	65.6732	0
1846	2.1398	306.38	145.003	2.6648	0.032	3927.923077	0.053295849	0.0032002	20	0	10.0006	65.673	0
1847	2.1399	306.08	144.974	2.6644	0.032	3924.128205	0.053288949	0.0031994	20	0	10.0006	65.6729	0
1848	2.14	305.72	144.942	2.6643	0.032	3919.487179	0.053285149	0.0031954	20	0	10.0006	65.6729	0
1849	2.1401	305.36	144.909	2.6638	0.0319	3914.871795	0.053276949	0.0031906	20	0	9.9998	65.6729	0
1850	2.1402	305.05	144.877	2.6636	0.0319	3910.846154	0.053272549	0.0031868	20	0	10.0002	65.6729	0
1851	2.1403	304.67	144.842	2.6632	0.0318	3906	0.053264999	0.0031828	20	0	9.9998	65.6729	0
1852	2.1404	304.32	144.809	2.663	0.0318	3901.589744	0.053259299	0.0031788	20	0	10.0002	65.6729	0
1853	2.1405	303.96	144.771	2.6626	0.0317	3896.948718	0.053251749	0.0031734	20	0	10.0002	65.6728	0
1854	2.1405	303.55	144.733	2.6621	0.0317	3891.666667	0.053242299	0.0031678	20	0	10.0002	65.6727	0
1855	2.1406	303.24	144.697	2.6617	0.0316	3887.666667	0.053234099	0.003163	20	0	10.0002	65.6726	0
1856	2.1407	302.84	144.656	2.6614	0.0316	3882.615385	0.053228449	0.0031576	20	0	9.9998	65.6726	0
1857	2.1408	302.43	144.614	2.6609	0.0315	3877.333333	0.053217699	0.0031512	20	0	10.0002	65.6727	0
1858	2.1409	302.07	144.573	2.6603	0.0314	3872.717949	0.053205749	0.0031442	20	0	10.0006	65.6727	0
1859	2.141	301.66	144.526	2.6598	0.0314	3867.435897	0.053196899	0.003137	20	0	10.0002	65.6728	0
1860	2.1411	301.28	144.483	2.6592	0.0313	3862.589744	0.053184949	0.00313	20	0	9.9998	65.6728	0
1861	2.1411	300.89	144.432	2.6586	0.0312	3857.538462	0.053172949	0.0031196	20	0	9.9998	65.6728	0
1862	2.1412	300.46	144.382	2.658	0.0311	3852.051282	0.053160999	0.0031102	20	0	9.9998	65.6728	0
1863	2.1413	300.07	144.333	2.6574	0.031	3847	0.053148399	0.0031024	20	0	10.0002	65.6729	0
1864	2.1414	299.61	144.281	2.6566	0.0309	3841.102564	0.053131999	0.0030928	20	0	10.0002	65.6729	0
1865	2.1415	299.18	144.225	2.6558	0.0308	3835.615385	0.053116899	0.003081	20	0	10.0002	65.6729	0
1866	2.1416	298.77	144.174	2.6551	0.0307	3830.333333	0.053101149	0.0030692	20	0	9.9998	65.6729	0
1867	2.1417	298.32	144.116	2.6541	0.0306	3824.666667	0.053081599	0.0030582	20	0	10.0002	65.6729	0
1868	2.1418	297.86	144.055	2.6533	0.0305	3818.74359	0.053066449	0.0030456	20	0	10.0002	65.6731	0
1869	2.1418	297.44	143.997	2.6525	0.0303	3813.282051	0.053049449	0.0030338	20	0	9.9993	65.6731	0
1870	2.1419	296.98	143.932	2.6515	0.0302	3807.384615	0.053029299	0.0030188	20	0	9.9993	65.6733	0
1871	2.142	296.56	143.868	2.6504	0.03	3802.102564	0.053007249	0.0030014	20	0	9.9993	65.6736	0
1872	2.1421	296.12	143.793	2.6492	0.0298	3796.410256	0.052983299	0.002981	20	0	9.9993	65.6739	0
1873	2.1422	295.64	143.715	2.648	0.0296	3790.307692	0.052959349	0.002962	20	0	9.9998	65.6744	0
1874	2.1423	295.2	143.641	2.6468	0.0294	3784.615385	0.052935399	0.0029416	20	0	10.0002	65.6746	0
1875	2.1424	294.71	143.559	2.6453	0.0292	3778.282051	0.052906399	0.0029202	20	0	9.9998	65.675	0
1876	2.1424	294.23	143.482	2.6442	0.029	3772.179487	0.052883099	0.0029006	20	0	10.0002	65.6751	0
1877	2.1425	293.74	143.4	2.6427	0.0288	3765.846154	0.052854699	0.002876	20	0	9.9993	65.6755	0
1878	2.1426	293.21	143.317	2.6414	0.0285	3759.102564	0.052827599	0.0028524	20	0	10.0006	65.6758	0
1879	2.1427	292.75	143.238	2.6402	0.0283	3753.205128	0.052803049	0.0028288	20	0	9.9998	65.6758	0
1880	2.1428	292.22	143.152	2.6386	0.0281	3746.461538	0.052772799	0.002806	20	0	10.0002	65.6759	0
1881	2.1429	291.71	143.065	2.6372	0.0278	3739.923077	0.052743199	0.0027806	20	0	9.9998	65.6759	0
1882	2.143	291.21	142.983	2.6359	0.0276	3733.410256	0.052718599	0.0027578	20	0	10.0002	65.676	0
1883	2.1431	290.66	142.896	2.6345	0.0273	3726.435897	0.052689599	0.0027318	20	0	10.0002	65.676	0
1884	2.1431	290.2	142.814	2.6332	0.0271	3720.538462	0.052663749	0.002709	20	0	9.9998	65.6764	0
1885	2.1432	289.64	142.724	2.6317	0.0268	3713.384615	0.052634799	0.002683	20	0	10.0002	65.6765	0
1886	2.1433	289.13	142.634	2.6302	0.0265	3706.846154	0.052603249	0.0026546	20	0	10.001	65.6768	0
1887	2.1434	288.61	142.549	2.6287	0.0263	3700.102564	0.052574899	0.0026308	20	0	9.9993	65.677	0
1888	2.1435	288.05	142.456	2.6273	0.026	3692.923077	0.052545299	0.0026032	20	0	9.9993	65.677	0
1889	2.1436	287.49	142.363	2.6257	0.0257	3685.769231	0.052513799	0.0025742	20	0	10.0006	65.6771	0
1890	2.1437	286.96	142.275	2.6243	0.0255	3679.025641	0.052486049	0.0025474	20	0	9.9998	65.6772	0
1891	2.1437	286.36	142.179	2.6227	0.0252	3671.230769	0.052453299	0.0025182	20	0	9.9998	65.6773	0
1892	2.1438	285.85	142.084	2.6212	0.0249	3664.692308	0.052423649	0.0024874	20	0	10.0002	65.6772	0
1893	2.1439	285.3	141.993	2.6197	0.0246	3657.74359	0.052393399	0.0024606	20	0	9.9998	65.6773	0
1894	2.144	284.73	141.895	2.618	0.0243	3650.358974	0.052359999	0.0024298	20	0	10.0002	65.6774	0
1895	2.1441	284.17	141.803	2.6165	0.024	3643.205128	0.052329749	0.0024014	20	0	10.0002	65.6776	0
1896	2.1442	283.59	141.703	2.6149	0.0237	3635.820513	0.052298249	0.0023676	20	0	9.9993	65.6776	0
1897	2.1443	283.02	141.603	2.6133	0.0234	3628.435897	0.052265499	0.002336	20	0	9.9998	65.6776	0
1898	2.1444	282.44	141.508	2.6116	0.0231	3621.051282	0.052232699	0.0023052	20	0	9.9998	65.6777	0
1899	2.1444	281.83	141.408	2.6099	0.0227	3613.25641	0.052198049	0.0022722	20	0	9.9998	65.6781	0
1900	2.1445	281.28	141.306	2.6082	0.0224	3606.102564	0.052164649	0.0022398	20	0	9.9998	65.6781	0
1901	2.1446	280.68	141.209	2.6068	0.0221	3598.512821	0.052135649	0.0022082	20	0	10.0002	65.6782	0
1902	2.1447	280.08	141.105	2.605	0.0217	3590.717949	0.052099099	0.0021728	20	0	10.0006	65.6785	0
1903	2.1448	279.5	141.007	2.6033	0.0214	3583.333333	0.052066349	0.0021404	20	0	10.0002	65.6786	0
1904	2.1449	278.91	140.902	2.6016	0.0211	3575.74359	0.052032949	0.0021058	20	0	10.0002	65.6786	0
1905	2.145	278.3	140.796	2.5998	0.0207	3567.948718	0.051996399	0.0020696	20	0	10.0002	65.6787	0
1906	2.1451	277.71	140.695	2.5982	0.0203	3560.358974	0.051964899	0.002034	20	0	9.9998	65.679	0
1907	2.1451	277.1	140.588	2.5964	0.02	3552.564103	0.051928949	0.001997	20	0	9.9998	65.6791	0
1908	2.1452	276.46	140.48	2.5947	0.0196	3544.358974	0.051893049	0.0019608	20	0	10.0002	65.6795	0
1909	2.1453	275.88	140.378	2.593	0.0193	3536.974359	0.051860249	0.0019268	20	0	10.0002	65.6797	0
1910	2.1454	275.24	140.268	2.5912	0.0189	3528.74359	0.051824999	0.0018866	20	0	10.0002	65.6797	0
1911	2.1455	274.65	140.164	2.5895	0.0185	3521.153846	0.051790299	0.001848	20	0	9.9998	65.6797	0
1912	2.1456	273.99	140.053	2.5877	0.0181	3512.74359	0.051753749	0.0018086	20	0	10.0002	65.6799	0
1913	2.1457	273.37	139.941	2.5857	0.0177	3504.717949	0.051713449	0.0017676	20	0	9.9989	65.6799	0
1914	2.1457	272.76	139.835	2.5839	0.0173	3496.923077	0.051678749	0.0017274	20	0	9.9998	65.68	0
1915	2.1458	272.12	139.722	2.5821	0.0169	3488.717949	0.051642849	0.0016864	20	0	10.0002	65.6803	0
1916	2.1459	271.48	139.608	2.5803	0.0164	3480.487179	0.051605649	0.0016446	20	0	10.0006	65.6809	0
1917	2.146	270.85	139.5	2.5784	0.016	3472.487179	0.051568499	0.0016036	20	0	9.9998	65.6809	0
1918	2.1461	270.2	139.385	2.5765	0.0156	3464.051282	0.051530649	0.001561	20	0	10.0006	65.6809	0
1919	2.1462	269.59	139.276	2.5747	0.0152	3456.25641	0.051494749	0.0015192	20	0	10.0006	65.681	0
1920	2.1463	268.91	139.16	2.5728	0.0148	3447.615385	0.051456949	0.001475	20	0	10.0006	65.6808	0
1921	2.1464	268.26	139.043	2.5709	0.0143	3439.179487	0.051418499	0.0014308	20	0	9.9993	65.6808	0
1922	2.1464	267.65	138.933	2.5691	0.0139	3431.384615	0.051382599	0.0013884	20	0	9.9998	65.6808	0
1923	2.1465	266.97	138.815	2.5671	0.0134	3422.74359	0.051342899	0.0013418	20	0	9.9998	65.6808	0
1924	2.1466	266.35	138.704	2.5653	0.013	3414.74359	0.051306949	0.0012976	20	0	10.0002	65.681	0
1925	2.1467	265.68	138.585	2.5634	0.0125	3406.102564	0.051267899	0.001252	20	0	10.0002	65.6812	0
1926	2.1468	264.98	138.465	2.5614	0.0121	3397.230769	0.051228199	0.0012062	20	0	10.0006	65.6814	0
1927	2.1469	264.38	138.353	2.5596	0.0116	3389.435897	0.051192249	0.0011612	20	0	10.0002	65.6814	0
1928	2.147	263.69	138.232	2.5576	0.0111	3380.589744	0.051151949	0.0011132	20	0	10.0002	65.6814	0
1929	2.147	263.01	138.11	2.5556	0.0106	3371.948718	0.051111599	0.0010642	20	0	9.9998	65.6815	0
1930	2.1471	262.39	137.996	2.5537	0.0102	3363.948718	0.051074399	0.0010186	20	0	9.9993	65.6815	0
1931	2.1472	261.7	137.874	2.5516	0.0097	3355.076923	0.051032199	0.0009704	20	0	10.0002	65.6817	0
1932	2.1473	261.07	137.759	2.5498	0.0093	3347.076923	0.050996249	0.0009262	20	0	10.0006	65.6818	0
1933	2.1474	260.35	137.636	2.5477	0.0088	3337.794872	0.050954049	0.0008758	20	0	9.9998	65.682	0
1934	2.1475	259.71	137.512	2.5457	0.0083	3329.589744	0.050913099	0.0008262	20	0	9.9998	65.6822	0
1935	2.1476	259.05	137.397	2.5438	0.0078	3321.153846	0.050876549	0.0007812	20	0	9.9998	65.6825	0
1936	2.1477	258.36	137.271	2.5417	0.0073	3312.307692	0.050834949	0.0007292	20	0	10.0002	65.6828	0
1937	2.1477	257.69	137.146	2.5397	0.0068	3303.666667	0.050794599	0.0006788	20	0	9.9998	65.6832	0
1938	2.1478	257.03	137.028	2.5378	0.0063	3295.230769	0.050756149	0.0006314	20	0	10.0002	65.6832	0
1939	2.1479	256.34	136.901	2.5355	0.0058	3286.384615	0.050710799	0.0005802	20	0	9.9998	65.6834	0
1940	2.148	255.61	136.775	2.5334	0.0053	3277.102564	0.050668549	0.0005282	20	0	10.0002	65.6835	0
1941	2.1481	254.97	136.657	2.5316	0.0048	3268.897436	0.050631399	0.0004784	20	0	10.0006	65.6835	0
1942	2.1482	254.25	136.53	2.5295	0.0043	3259.615385	0.050589149	0.000428	20	0	9.9998	65.6835	0
1943	2.1483	253.63	136.411	2.5275	0.0038	3251.615385	0.050550099	0.0003776	20	0	10.0006	65.6835	0
1944	2.1484	252.93	136.283	2.5255	0.0032	3242.74359	0.050509099	0.000324	20	0	10.0002	65.6835	0
1945	2.1484	252.24	136.156	2.5233	0.0027	3233.897436	0.050465649	0.000272	20	0	9.9989	65.6835	0
1946	2.1485	251.57	136.036	2.5213	0.0022	3225.25641	0.050425299	0.0002214	20	0	9.9998	65.6837	0
1947	2.1486	250.9	135.907	2.5192	0.0017	3216.615385	0.050384949	0.000167	20	0	9.9998	65.6841	0
1948	2.1487	250.21	135.787	2.5173	0.0012	3207.769231	0.050345249	0.0001158	20	0	9.9998	65.6843	0
1949	2.1488	249.53	135.658	2.5151	0.0006	3199.128205	0.050302399	6.06E-05	20	0	10.0006	65.6851	0
1950	2.1489	248.83	135.528	2.5131	0	3190.076923	0.050261449	4.60E-06	20	0	10.001	65.6853	0
1951	2.149	248.15	135.407	2.511	-0.0005	3181.435897	0.050219849	-4.72E-05	20	0	10.0006	65.6852	0
1952	2.149	247.46	135.279	2.5088	-0.001	3172.564103	0.050176999	-0.0001016	20	0	10.0002	65.6851	0
1953	2.1491	246.75	135.149	2.5068	-0.0016	3163.512821	0.050135399	-0.0001568	20	0	10.0006	65.6849	0
1954	2.1492	246.11	135.027	2.5049	-0.0021	3155.282051	0.050097599	-0.0002112	20	0	9.9998	65.6849	0
1955	2.1493	245.42	134.897	2.5027	-0.0027	3146.435897	0.050054099	-0.0002664	20	0	10.0006	65.6848	0
1956	2.1494	244.72	134.768	2.5005	-0.0032	3137.384615	0.050009999	-0.0003248	20	0	10.0002	65.6846	0
1957	2.1495	244.06	134.646	2.4986	-0.0038	3128.948718	0.049971549	-0.0003776	20	0	10.0002	65.6845	0
1958	2.1496	243.33	134.515	2.4964	-0.0043	3119.666667	0.049927449	-0.0004336	20	0	9.9998	65.6845	0
1959	2.1497	242.68	134.392	2.4944	-0.0049	3111.230769	0.049888999	-0.0004888	20	0	9.9998	65.6845	0
1960	2.1497	242.02	134.261	2.4925	-0.0055	3102.820513	0.049849299	-0.0005486	20	0	9.9993	65.6847	0
1961	2.1498	241.3	134.129	2.4901	-0.0061	3093.538462	0.049802649	-0.0006062	20	0	10.0002	65.6847	0
1962	2.1499	240.64	134.006	2.4881	-0.0066	3085.102564	0.049762349	-0.0006606	20	0	10.0002	65.6849	0
1963	2.15	239.93	133.874	2.4859	-0.0072	3076.051282	0.049718849	-0.000722	20	0	9.9998	65.6849	0
1964	2.1501	239.22	133.742	2.4839	-0.0078	3066.974359	0.049677249	-0.0007804	20	0	10.0002	65.6852	0
1965	2.1502	238.6	133.618	2.4818	-0.0084	3058.974359	0.049636949	-0.0008388	20	0	9.9998	65.6854	0
1966	2.1503	237.86	133.486	2.4797	-0.009	3049.487179	0.049593449	-0.0008972	20	0	9.9993	65.6859	0
1967	2.1503	237.2	133.362	2.4776	-0.0095	3041.051282	0.049551849	-0.0009532	20	0	9.9998	65.6863	0
1968	2.1504	236.53	133.23	2.4755	-0.0102	3032.410256	0.049510899	-0.001017	20	0	9.9998	65.6866	0
1969	2.1505	235.84	133.098	2.4734	-0.0107	3023.564103	0.049468049	-0.0010746	20	0	10.0014	65.6865	0
1970	2.1506	235.2	132.974	2.4713	-0.0113	3015.358974	0.049426449	-0.0011312	20	0	10.0002	65.6862	0
1971	2.1507	234.49	132.842	2.4692	-0.0119	3006.282051	0.049384849	-0.001192	20	0	10.001	65.686	0
1972	2.1508	233.83	132.717	2.4672	-0.0125	2997.846154	0.049343249	-0.0012488	20	0	10.0006	65.6856	0
1973	2.1509	233.14	132.584	2.465	-0.0131	2989	0.049300399	-0.0013102	20	0	10.0006	65.6852	0
1974	2.151	232.47	132.452	2.4629	-0.0137	2980.358974	0.049257549	-0.0013702	20	0	10.0002	65.6848	0
1975	2.151	231.79	132.327	2.4609	-0.0143	2971.717949	0.049218499	-0.0014278	20	0	10.0006	65.6846	0
1976	2.1511	231.12	132.195	2.4587	-0.0149	2963.076923	0.049174999	-0.0014884	20	0	10.0002	65.6844	0
1977	2.1512	230.43	132.064	2.4567	-0.0155	2954.230769	0.049133399	-0.0015508	20	0	10.0002	65.6843	0
1978	2.1513	229.81	131.94	2.4546	-0.0161	2946.230769	0.049092449	-0.001606	20	0	9.9998	65.6843	0
1979	2.1514	229.11	131.807	2.4524	-0.0167	2937.358974	0.049048949	-0.0016706	20	0	9.9998	65.6843	0
1980	2.1515	228.46	131.684	2.4505	-0.0173	2928.948718	0.049009249	-0.0017274	20	0	10.0002	65.6846	0
1981	2.1516	227.78	131.552	2.4483	-0.0179	2920.307692	0.048965749	-0.001788	20	0	9.9998	65.6848	0
1982	2.1516	227.13	131.421	2.4462	-0.0185	2911.871795	0.048924149	-0.0018496	20	0	9.9989	65.6848	0
1983	2.1517	226.45	131.296	2.4443	-0.0191	2903.230769	0.048885749	-0.0019072	20	0	9.9993	65.6849	0
1984	2.1518	225.78	131.166	2.4421	-0.0197	2894.589744	0.048841599	-0.0019686	20	0	9.9998	65.6854	0
1985	2.1519	225.1	131.034	2.44	-0.0203	2885.948718	0.048800649	-0.00203	20	0	9.9993	65.6858	0
1986	2.152	224.48	130.912	2.438	-0.0209	2877.923077	0.048760949	-0.0020868	20	0	9.9989	65.6862	0
1987	2.1521	223.82	130.781	2.436	-0.0215	2869.512821	0.048719349	-0.0021476	20	0	9.9989	65.6868	0
1988	2.1522	223.2	130.658	2.434	-0.0221	2861.487179	0.048679049	-0.002206	20	0	9.9993	65.6873	0
1989	2.1523	222.51	130.529	2.4318	-0.0227	2852.641026	0.048636799	-0.0022674	20	0	10.001	65.6878	0
1990	2.1523	221.85	130.399	2.4298	-0.0233	2844.205128	0.048595849	-0.0023282	20	0	10.0002	65.6876	0
1991	2.1524	221.24	130.277	2.4279	-0.0238	2836.410256	0.048557399	-0.0023848	20	0	10.0006	65.6873	0
1992	2.1525	220.58	130.147	2.4258	-0.0245	2827.974359	0.048515149	-0.0024456	20	0	10.0014	65.6869	0
1993	2.1526	219.91	130.017	2.4236	-0.0251	2819.333333	0.048472949	-0.0025056	20	0	10.0006	65.6866	0
1994	2.1527	219.3	129.897	2.4218	-0.0256	2811.538462	0.048435749	-0.0025622	20	0	10.001	65.6863	0
[truncated: 18,360 more rows]
